# Supplementary material for: Omics Derived Biomarkers and Novel Drug Targets for Improved Intervention in Advanced Prostate Cancer
Source: MDPI journal article supplement (doi:10.3390/diagnostics10090658), 2020-08-31
Supplement: s1 [file s1]

**Table S1. List of selected manuscripts after applying citation threshold**

| Title                                                                                        | Authors                                                                                                                                                                                                                                                                                                                                                                                                                                                                                                                                                                                                                                                                                      | Journal                         | Publication Year | Volume | Issue | Total Citations | Average per Year |
|----------------------------------------------------------------------------------------------|----------------------------------------------------------------------------------------------------------------------------------------------------------------------------------------------------------------------------------------------------------------------------------------------------------------------------------------------------------------------------------------------------------------------------------------------------------------------------------------------------------------------------------------------------------------------------------------------------------------------------------------------------------------------------------------------|---------------------------------|------------------|--------|-------|-----------------|------------------|
| GEPIA: a web server for cancer and normal gene expression profiling and interactive analyses | Tang, Zefang; Li, Chenwei; Kang, Boxi; Gao, Ge; Li, Cheng; Zhang, Zemin                                                                                                                                                                                                                                                                                                                                                                                                                                                                                                                                                                                                                      | NUCLEIC ACIDS RESEARCH          | 2017             | 45     | W1    | 1218            | 304,5            |
| The landscape of long noncoding RNAs in the human transcriptome                              | Iyer, Matthew K.; Niknafs, Yashar S.; Malik, Rohit; Singhal, Udit; Sahu, Anirban; Hosono, Yasuyuki; Barrette, Terrence R.; Prensner, John R.; Evans, Joseph R.; Zhao, Shuang; Poliakov, Anton; Cao, Xuhong; Dhanasekaran, Saravana M.; Wu, Yi-Mi; Robinson, Dan R.; Beer, David G.; Feng, Felix Y.; Iyer, Hariharan K.; Chinnaiyan, Arul M.                                                                                                                                                                                                                                                                                                                                                  | NATURE GENETICS                 | 2015             | 47     | 3     | 1100            | 183,33           |
| Long Noncoding RNAs in Cancer Pathways                                                       | Schmitt, Adam M.; Chang, Howard Y.                                                                                                                                                                                                                                                                                                                                                                                                                                                                                                                                                                                                                                                           | CANCER CELL                     | 2016             | 29     | 4     | 1076            | 215,2            |
| DNA-Repair Defects and Olaparib in Metastatic Prostate Cancer                                | Mateo, J.; Carreira, S.; Sandhu, S.; Miranda, S.; Mossop, H.; Perez-Lopez, R.; Rodrigues, D. Nava; Robinson, D.; Omlin, A.; Tunariu, N.; Boysen, G.; Porta, N.; Flohr, P.; Gillman, A.; Figueiredo, I.; Paulding, C.; Seed, G.; Jain, S.; Ralph, C.; Protheroe, A.; Hussain, S.; Jones, R.; Elliott, T.; McGovern, U.; Bianchini, D.; Goodall, J.; Zafeiriou, Z.; Williamson, C. T.; Ferraldeschi, R.; Riisnaes, R.; Ebbs, B.; Fowler, G.; Roda, D.; Yuan, W.; Wu, Y. -M.; Cao, X.; Brough, R.; Pemberton, H.; A'Hern, R.; Swain, A.; Kunju, L. P.; Eeles, R.; Attard, G.; Lord, C. J.; Ashworth, A.; Rubin, M. A.; Knudsen, K. E.; Feng, F. Y.; Chinnaiyan, A. M.; Hall, E.; de Bono, J. S. | NEW ENGLAND JOURNAL OF MEDICINE | 2015             | 373    | 18    | 935             | 155,83           |

|                                                                                      |                                                                                                                                                                                                                                                                                                                                                                                                                                                                                                                                                                     |                       |      |     |       |     |        |
|--------------------------------------------------------------------------------------|---------------------------------------------------------------------------------------------------------------------------------------------------------------------------------------------------------------------------------------------------------------------------------------------------------------------------------------------------------------------------------------------------------------------------------------------------------------------------------------------------------------------------------------------------------------------|-----------------------|------|-----|-------|-----|--------|
| The evolutionary history of lethal metastatic prostate cancer                        | Gundem, Gunes; Van Loo, Peter; Kremeyer, Barbara; Alexandrov, Ludmil B.; Tubio, Jose M. C.; Papaemmanuil, Elli; Brewer, Daniel S.; Kallio, Heini M. L.; Hoegnas, Gunilla; Annala, Matti; Kivinummi, Kati; Goody, Victoria; Latimer, Calli; O'Meara, Sarah; Dawson, Kevin J.; Isaacs, William; Emmert-Buck, Michael R.; Nykter, Matti; Foster, Christopher; Kote-Jarai, Zsofia; Easton, Douglas; Whitaker, Hayley C.; Neal, David E.; Cooper, Colin S.; Eeles, Rosalind A.; Visakorpi, Tapio; Campbell, Peter J.; McDermott, Ultan; Wedge, David C.; Bova, G. Steven | NATURE                | 2015 | 520 | 7547  | 604 | 100,67 |
| Divergent clonal evolution of castration-resistant neuroendocrine prostate cancer    | Beltran, Himisha; Prandi, Davide; Mosquera, Juan Miguel; Benelli, Matteo; Puca, Loredana; Cyrta, Joanna; Marotz, Clarisse; Giannopoulou, Eugenia; Chakravarthi, Balabhadrapatruni V. S. K.; Varambally, Sooryanarayana; Tomlins, Scott A.; Nanus, David M.; Tagawa, Scott T.; Van Allen, Eliezer M.; Elemento, Olivier; Sboner, Andrea; Garraway, Levi A.; Rubin, Mark A.; Demichelis, Francesca                                                                                                                                                                    | NATURE MEDICINE       | 2016 | 22  | 3     | 485 | 97     |
| Long Noncoding RNA and Cancer: A New Paradigm                                        | Bhan, Arunoday; Soleimani, Milad; Mandal, Subhrangsu S.                                                                                                                                                                                                                                                                                                                                                                                                                                                                                                             | CANCER RESEARCH       | 2017 | 77  | 15    | 457 | 114,25 |
| Prostate cancer                                                                      | Attard, Gerhard; Parker, Chris; Eeles, Ros A.; Schroder, Fritz; Tomlins, Scott A.; Tannock, Ian; Drake, Charles G.; de Bono, Johann S.                                                                                                                                                                                                                                                                                                                                                                                                                              | LANCET                | 2016 | 387 | 10013 | 434 | 86,8   |
| Targeting metastasis                                                                 | Steeg, Patricia S.                                                                                                                                                                                                                                                                                                                                                                                                                                                                                                                                                  | NATURE REVIEWS CANCER | 2016 | 16  | 4     | 413 | 82,6   |
| Emerging mechanisms of resistance to androgen receptor inhibitors in prostate cancer | Watson, Philip A.; Arora, Vivek K.; Sawyers, Charles L.                                                                                                                                                                                                                                                                                                                                                                                                                                                                                                             | NATURE REVIEWS CANCER | 2015 | 15  | 12    | 407 | 67,83  |

|                                                                                                                                          |                                                                                                                                                                                                                                                                                                                                                                                                                                                                                                                                                                                                                                                                      |                                                                  |      |    |    |     |      |
|------------------------------------------------------------------------------------------------------------------------------------------|----------------------------------------------------------------------------------------------------------------------------------------------------------------------------------------------------------------------------------------------------------------------------------------------------------------------------------------------------------------------------------------------------------------------------------------------------------------------------------------------------------------------------------------------------------------------------------------------------------------------------------------------------------------------|------------------------------------------------------------------|------|----|----|-----|------|
| Prostate Cancer, Version 1.2016<br>Featured Updates to the NCCN<br>Guidelines                                                            | Mohler, James L.; Armstrong, Andrew J.;<br>Bahnson, Robert R.; D'Amico, Anthony<br>Victor; Davis, Brian J.; Eastham, James A.;<br>Enke, Charles A.; Farrington, Thomas A.;<br>Higano, Celestia S.; Horwitz, Eric M.;<br>Hurwitz, Michael; Kane, Christopher J.;<br>Kawachi, Mark H.; Kuettel, Michael; Lee,<br>Richard J.; Meeks, Joshua J.; Penson,<br>David F.; Plimack, Elizabeth R.; Pow-Sang,<br>Julio M.; Raben, David; Richey, Sylvia;<br>Roach, Mack, III; Rosenfeld, Stan;<br>Schaeffer, Edward; Skolarus, Ted A.; Small,<br>Eric J.; Sonpavde, Guru; Srinivas, Sandy;<br>Strope, Seth A.; Tward, Jonathan; Shead,<br>Dorothy A.; Freedman-Cass, Deborah A. | JOURNAL OF THE<br>NATIONAL<br>COMPREHENSIVE<br>CANCER<br>NETWORK | 2016 | 14 | 1  | 393 | 78,6 |
| Emerging applications of<br>metabolomics in drug discovery<br>and precision medicine                                                     | Wishart, David S.                                                                                                                                                                                                                                                                                                                                                                                                                                                                                                                                                                                                                                                    | NATURE REVIEWS<br>DRUG DISCOVERY                                 | 2016 | 15 | 7  | 349 | 69,8 |
| Mechanisms of long noncoding<br>RNA function in development and<br>disease                                                               | Schmitz, Sandra U.; Grote, Phillip;<br>Herrmann, Bernhard G.                                                                                                                                                                                                                                                                                                                                                                                                                                                                                                                                                                                                         | CELLULAR AND<br>MOLECULAR LIFE<br>SCIENCES                       | 2016 | 73 | 13 | 286 | 57,2 |
| Substantial interindividual and<br>limited intraindividual genomic<br>diversity among tumors from men<br>with metastatic prostate cancer | Kumar, Akash; Coleman, Ilsa; Morrissey,<br>Colm; Zhang, Xiaotun; True, Lawrence D.;<br>Gulati, Roman; Etzioni, Ruth; Bolouri,<br>Hamid; Montgomery, Bruce; White,<br>Thomas; Lucas, Jared M.; Brown, Lisha G.;<br>Dumpit, Ruth F.; DeSarkar, Navonil; Higano,<br>Celestia; Yu, Evan Y.; Coleman, Roger;<br>Schultz, Nikolaus; Fang, Min; Lange, Paul<br>H.; Shendure, Jay; Vessella, Robert L.;<br>Nelson, Peter S.                                                                                                                                                                                                                                                  | NATURE MEDICINE                                                  | 2016 | 22 | 4  | 267 | 53,4 |

|                                                                                                                                               |                                                                                                                                                                                                                                                                                                                                                                                                                                                |                                |      |    |     |     |       |
|-----------------------------------------------------------------------------------------------------------------------------------------------|------------------------------------------------------------------------------------------------------------------------------------------------------------------------------------------------------------------------------------------------------------------------------------------------------------------------------------------------------------------------------------------------------------------------------------------------|--------------------------------|------|----|-----|-----|-------|
| Androgen Receptor Gene Aberrations in Circulating Cell-Free DNA: Biomarkers of Therapeutic Resistance in Castration-Resistant Prostate Cancer | Azad, Arun A.; Volik, Stanislav V.; Wyatt, Alexander W.; Haegert, Anne; Le Bihan, Stephane; Bell, Robert H.; Anderson, Shawn A.; McConeghy, Brian; Shukin, Robert; Bazov, Jenny; Youngren, Jack; Paris, Pamela; Thomas, George; Small, Eric J.; Wang, Yuzhuo; Gleave, Martin E.; Collins, Colin C.; Chi, Kim N.                                                                                                                                | CLINICAL CANCER RESEARCH       | 2015 | 21 | 10  | 236 | 39,33 |
| Plasma AR and abiraterone-resistant prostate cancer                                                                                           | Romanel, Alessandro; Tandefelt, Delila Gasi; Conteduca, Vincenza; Jayaram, Anuradha; Casiraghi, Nicola; Wetterskog, Daniel; Salvi, Samanta; Amadori, Dino; Zafeiriou, Zafeiris; Rescigno, Pasquale; Bianchini, Diletta; Gurioli, Giorgia; Casadio, Valentina; Carreira, Suzanne; Goodall, Jane; Wingate, Anna; Ferraldeschi, Roberta; Tunariu, Nina; Flohr, Penny; De Giorgi, Ugo; de Bono, Johann S.; Demichelis, Francesca; Attard, Gerhardt | SCIENCE TRANSLATIONAL MEDICINE | 2015 | 7  | 312 | 225 | 37,5  |

|                                                                            |                                                                                                                                                                                                                                                                                                                                                                                                                                                                                                                                                                                                                                                                                                                                                                                                                                                                                                                                                                                                                                                                                                                                                                                       |                                       |      |    |   |     |      |
|----------------------------------------------------------------------------|---------------------------------------------------------------------------------------------------------------------------------------------------------------------------------------------------------------------------------------------------------------------------------------------------------------------------------------------------------------------------------------------------------------------------------------------------------------------------------------------------------------------------------------------------------------------------------------------------------------------------------------------------------------------------------------------------------------------------------------------------------------------------------------------------------------------------------------------------------------------------------------------------------------------------------------------------------------------------------------------------------------------------------------------------------------------------------------------------------------------------------------------------------------------------------------|---------------------------------------|------|----|---|-----|------|
| Spatial genomic heterogeneity within localized, multifocal prostate cancer | Boutros, Paul C.; Fraser, Michael; Harding, Nicholas J.; de Borja, Richard; Trudel, Dominique; Lalonde, Emilie; Meng, Alice; Hennings-Yeomans, Pablo H.; McPherson, Andrew; Sabelnykova, Veronica Y.; Zia, Amin; Fox, Natalie S.; Livingstone, Julie; Shiah, Yu-Jia; Wang, Jianxin; Beck, Timothy A.; Have, Cherry L.; Chong, Taryne; Sam, Michelle; Johns, Jeremy; Timms, Lee; Buchner, Nicholas; Wong, Ada; Watson, John D.; Simmons, Trent T.; P'ng, Christine; Zafarana, Gaetano; Nguyen, Francis; Luo, Xuemei; Chu, Kenneth C.; Prokopec, Stephenie D.; Sykes, Jenna; Dal Pra, Alan; Berlin, Alejandro; Brown, Andrew; Chan-Seng-Yue, Michelle A.; Yousif, Fouad; Denroche, Robert E.; Chong, Lauren C.; Chen, Gregory M.; Jung, Esther; Fung, Clement; Starmans, Maud H. W.; Chen, Hanbo; Govind, Shaylan K.; Hawley, James; D'Costa, Alister; Pintilie, Melania; Waggott, Daryl; Hach, Faraz; Lambin, Philippe; Muthuswamy, Lakshmi B.; Cooper, Colin; Eeles, Rosalind; Neal, David; Tetu, Bernard; Sahinalp, Cenk; Stein, Lincoln D.; Fleshner, Neil; Shah, Sohrab P.; Collins, Colin C.; Hudson, Thomas J.; McPherson, John D.; van der Kwast, Theodorus; Bristow, Robert G. | NATURE GENETICS                       | 2015 | 47 | 7 | 219 | 36,5 |
| Sphingolipids and their metabolism in physiology and disease               | Hannun, Yusuf A.; Obeid, Lina M.                                                                                                                                                                                                                                                                                                                                                                                                                                                                                                                                                                                                                                                                                                                                                                                                                                                                                                                                                                                                                                                                                                                                                      | NATURE REVIEWS MOLECULAR CELL BIOLOGY | 2018 | 19 | 3 | 216 | 72   |

|                                                                                                                                                                            |                                                                                                                                                                                                                                                                                                                                                                                                                                                                                                                                                                                                                                                                                                                                                                                                                                                                                                                                                                                                                                                                                                                                                                                                                                                                     |                     |      |    |   |     |       |
|----------------------------------------------------------------------------------------------------------------------------------------------------------------------------|---------------------------------------------------------------------------------------------------------------------------------------------------------------------------------------------------------------------------------------------------------------------------------------------------------------------------------------------------------------------------------------------------------------------------------------------------------------------------------------------------------------------------------------------------------------------------------------------------------------------------------------------------------------------------------------------------------------------------------------------------------------------------------------------------------------------------------------------------------------------------------------------------------------------------------------------------------------------------------------------------------------------------------------------------------------------------------------------------------------------------------------------------------------------------------------------------------------------------------------------------------------------|---------------------|------|----|---|-----|-------|
| Analysis of the genetic phylogeny of multifocal prostate cancer identifies multiple independent clonal expansions in neoplastic and morphologically normal prostate tissue | Cooper, Colin S.; Eeles, Rosalind; Wedge, David C.; Van Loo, Peter; Gundem, Gunes; Alexandrov, Ludmil B.; Kremeyer, Barbara; Butler, Adam; Lynch, Andrew G.; Camacho, Niedzica; Massie, Charlie E.; Kay, Jonathan; Luxton, Hayley J.; Edwards, Sandra; Kote-Jarai, Zsafia; Dennis, Nening; Merson, Sue; Leongamornlert, Daniel; Zamora, Jorge; Corbishley, Cathy; Thomas, Sarah; Nik-Zainal, Serena; O'Meara, Sarah; Matthews, Lucy; Clark, Jeremy; Hurst, Rachel; Mithen, Richard; Bristow, Robert G.; Boutros, Paul C.; Fraser, Michael; Cooke, Susanna; Raine, Keiran; Jones, David; Menzies, Andrew; Stebbings, Lucy; Hinton, Jon; Teague, Jon; McLaren, Stuart; Mudie, Laura; Hardy, Claire; Anderson, Elizabeth; Joseph, Olivia; Goody, Victoria; Robinson, Ben; Maddison, Mark; Gamble, Stephen; Greenman, Christopher; Berney, Dan; Hazell, Steven; Livni, Naomi; Fisher, Cyril; Ogden, Christopher; Kumar, Pardeep; Thompson, Alan; Woodhouse, Christopher; Nicol, David; Mayer, Erik; Dudderidge, Tim; Shah, Nimish C.; Gnanapragasam, Vincent; Voet, Thierry; Campbell, Peter; Futreal, Andrew; Easton, Douglas; Warren, Anne Y.; Foster, Christopher S.; Stratton, Michael R.; Whitaker, Hayley C.; McDermott, Ultan; Brewer, Daniel S.; Neal, David E. | NATURE GENETICS     | 2015 | 47 | 4 | 215 | 35,83 |
| Differentiation of mammary tumors and reduction in metastasis upon Malat1 lncRNA loss                                                                                      | Arun, Gayatri; Diermeier, Sarah; Akerman, Martin; Chang, Kung-Chi; Wilkinson, J. Erby; Hearn, Stephen; Kim, Youngsoo; MacLeod, A. Robert; Krainer, Adrian R.; Norton, Larry; Brogi, Edi; Egeblad, Mikala; Spector, David L.                                                                                                                                                                                                                                                                                                                                                                                                                                                                                                                                                                                                                                                                                                                                                                                                                                                                                                                                                                                                                                         | GENES & DEVELOPMENT | 2016 | 30 | 1 | 212 | 42,4  |

|                                                                                       |                                                                                                                                                                                                                                                                                                                                                                                                                                                                                                                                                                              |                       |      |     |      |     |      |
|---------------------------------------------------------------------------------------|------------------------------------------------------------------------------------------------------------------------------------------------------------------------------------------------------------------------------------------------------------------------------------------------------------------------------------------------------------------------------------------------------------------------------------------------------------------------------------------------------------------------------------------------------------------------------|-----------------------|------|-----|------|-----|------|
| Long noncoding RNAs in cancer: mechanisms of action and technological advancements    | Bartonicek, Nenad; Maag, Jesper L. V.; Dinger, Marcel E.                                                                                                                                                                                                                                                                                                                                                                                                                                                                                                                     | MOLECULAR CANCER      | 2016 | 15  |      | 206 | 41,2 |
| Integrative clinical genomics of metastatic cancer                                    | Robinson, Dan R.; Wu, Yi-Mi; Lonigro, Robert J.; Vats, Pankaj; Cobain, Erin; Everett, Jessica; Cao, Xuhong; Rabban, Erica; Kumar-Sinha, Chandan; Raymond, Victoria; Schuetze, Scott; Alva, Ajjai; Siddiqui, Javed; Chugh, Rashmi; Worden, Francis; Zalupski, Mark M.; Innis, Jeffrey; Mody, Rajen J.; Tomlins, Scott A. .; Lucas, David; Baker, Laurence H.; Ramnath, Nithya; Schott, Ann F.; Hayes, Daniel F.; Vijai, Joseph; Offit, Kenneth; Stoffel, Elena M.; Roberts, J. Scott; Smith, David C.; Kunju, Lakshmi P.; Talpaz, Moshe; Cieslik, Marcin; Chinnaiyan, Arul M. | NATURE                | 2017 | 548 | 7667 | 202 | 50,5 |
| Tracking the origins and drivers of subclonal metastatic expansion in prostate cancer | Hong, Matthew K. H.; Macintyre, Geoff; Wedge, David C.; Van Loo, Peter; Patel, Keval; Lunke, Sebastian; Alexandrov, Ludmil B.; Sloggett, Clare; Cmero, Marek; Marass, Francesco; Tsui, Dana; Mangiola, Stefano; Lonie, Andrew; Naeem, Haroon; Sapre, Nikhil; Phal, Pramit M.; Kurganovs, Natalie; Chin, Xiaowen; Kerger, Michael; Warren, Anne Y.; Neal, David; Gnanapragasam, Vincent; Rosenfeld, Nitzan; Pedersen, John S.; Ryan, Andrew; Haviv, Izhak; Costello, Anthony J.; Corcoran, Niall M.; Hovens, Christopher M.                                                   | NATURE COMMUNICATIONS | 2015 | 6   |      | 189 | 31,5 |
| Abscopal effects of radiation therapy: A clinical review for the radiobiologist       | Siva, Shankar; MacManus, Michael P.; Martin, Roger F.; Martin, Olga A.                                                                                                                                                                                                                                                                                                                                                                                                                                                                                                       | CANCER LETTERS        | 2015 | 356 | 1    | 183 | 30,5 |

|                                                              |                                                                                                                                                                                                                                                                                                                                                                                                                                                                                                                                                                                                                                                                                                                                                                                                                                                                                                                                                                                                                                                                                                                                                                                                                                                                                        |        |      |     |      |     |       |
|--------------------------------------------------------------|----------------------------------------------------------------------------------------------------------------------------------------------------------------------------------------------------------------------------------------------------------------------------------------------------------------------------------------------------------------------------------------------------------------------------------------------------------------------------------------------------------------------------------------------------------------------------------------------------------------------------------------------------------------------------------------------------------------------------------------------------------------------------------------------------------------------------------------------------------------------------------------------------------------------------------------------------------------------------------------------------------------------------------------------------------------------------------------------------------------------------------------------------------------------------------------------------------------------------------------------------------------------------------------|--------|------|-----|------|-----|-------|
| Genomic hallmarks of localized, non-indolent prostate cancer | Fraser, Michael; Sabelnykova, Veronica Y.; Yamaguchi, Takafumi N.; Heisler, Lawrence E.; Livingstone, Julie; Huang, Vincent; Shiah, Yu-Jia; Yousif, Fouad; Lin, Xihui; Masella, Andre P.; Fox, Natalie S.; Xie, Michael; Prokopec, Stephenie D.; Berlin, Alejandro; Lalonde, Emilie; Ahmed, Musaddeque; Trudel, Dominique; Luo, Xuemei; Beck, Timothy A.; Meng, Alice; Zhang, Junyan; D'Costa, Alister; Denroche, Robert E.; Kong, Haiying; Espiritu, Shadrielle Melijah G.; Chua, Melvin L. K.; Wong, Ada; Chong, Taryne; Sam, Michelle; Johns, Jeremy; Timms, Lee; Buchner, Nicholas B.; Orain, Michele; Picard, Valerie; Hovington, Helene; Murison, Alexander; Kron, Ken; Harding, Nicholas J.; P'ng, Christine; Houlahan, Kathleen E.; Chu, Kenneth C.; Lo, Bryan; Francis Nguyen; Li, Constance H.; Sun, Ren X.; de Borja, Richard; Cooper, Christopher I.; Hopkins, Julia F.; Govind, Shaylan K.; Fung, Clement; Waggott, Daryl; Green, Jeffrey; Haider, Syed; Chan-Seng-Yue, Michelle A.; Jung, Esther; Wang, Zhiyuan; Bergeron, Alain; Dal Pra, Alan; Lacombe, Louis; Collins, Colin C.; Sahinalp, Cenk; Lupien, Mathieu; Fleshner, Neil E.; He, Housheng H.; Fradet, Yves; Tetu, Bernard; van der Kwast, Theodorus; McPherson, John D.; Bristow, Robert G.; Boutros, Paul C. | NATURE | 2017 | 541 | 7637 | 175 | 43,75 |
|--------------------------------------------------------------|----------------------------------------------------------------------------------------------------------------------------------------------------------------------------------------------------------------------------------------------------------------------------------------------------------------------------------------------------------------------------------------------------------------------------------------------------------------------------------------------------------------------------------------------------------------------------------------------------------------------------------------------------------------------------------------------------------------------------------------------------------------------------------------------------------------------------------------------------------------------------------------------------------------------------------------------------------------------------------------------------------------------------------------------------------------------------------------------------------------------------------------------------------------------------------------------------------------------------------------------------------------------------------------|--------|------|-----|------|-----|-------|



|                                                                     |                                                                                                                                                                                                                                                                                                                                                                                                                                                                                                                                                                                                                                                                                                                                                |                  |      |    |   |     |       |
|---------------------------------------------------------------------|------------------------------------------------------------------------------------------------------------------------------------------------------------------------------------------------------------------------------------------------------------------------------------------------------------------------------------------------------------------------------------------------------------------------------------------------------------------------------------------------------------------------------------------------------------------------------------------------------------------------------------------------------------------------------------------------------------------------------------------------|------------------|------|----|---|-----|-------|
| The long tail of oncogenic drivers in prostate cancer               | Armenia, Joshua; Wankowicz, Stephanie A. M.; Liu, David; Gao, Jianjiong; Kundra, Ritika; Reznik, Ed; Chatila, Walid K.; Chakravarty, Debyani; Han, G. Celine; Coleman, Ilsa; Montgomery, Bruce; Pritchard, Colin; Morrissey, Colm; Barbieri, Christopher E.; Beltran, Himisha; Sboner, Andrea; Zafeiriou, Zafeiris; Miranda, Susana; Bielski, Craig M.; Penson, Alexander V.; Tolonen, Charlotte; Huang, Franklin W.; Robinson, Dan; Wu, Yi Mi; Lonigro, Robert; Garraway, Levi A.; Demichelis, Francesca; Kantoff, Philip W.; Taplin, Mary-Ellen; Abida, Wassim; Taylor, Barry S.; Scher, Howard I.; Nelson, Peter S.; de Bono, Johann S.; Rubin, Mark A.; Sawyers, Charles L.; Chinnaiyan, Arul M.; Schultz, Nikolaus; Van Allen, Eliezer M. | NATURE GENETICS  | 2018 | 50 | 5 | 161 | 53,67 |
| Targeting YAP-Dependent MDSC Infiltration Impairs Tumor Progression | Wang, Guocan; Lu, Xin; Dey, Prasenjit; Deng, Pingna; Wu, Chia Chin; Jiang, Shan; Fang, Zhuangna; Zhao, Kuo; Konaparthi, Ramakrishna; Hua, Sujun; Zhang, Jianhua; Li-Ning-Tapia, Elsa M.; Kapoor, Avnish; Wu, Chang-Jiun; Patel, Neelay Bhaskar; Guo, Zhenglin; Ramamoorthy, Vandhana; Tieu, Trang N.; Heffernan, Tim; Zhao, Di; Shang, Xiaoying; Khadka, Sunada; Hou, Pingping; Hu, Baoli; Jin, Eun-Jung; Yao, Wantong; Pan, Xiaolu; Ding, Zhihu; Shi, Yanxia; Li, Liren; Chang, Qing; Troncoso, Patricia; Logethetis, Christopher J.; McArthur, Mark J.; Chin, Lynda; Wang, Y. Alan; DePinho, Ronaldo A.                                                                                                                                      | CANCER DISCOVERY | 2016 | 6  | 1 | 149 | 29,8  |

|                                                                                                                                                                                                                                 |                                                                                                                                                                                                                                                                         |                              |      |     |    |     |       |
|---------------------------------------------------------------------------------------------------------------------------------------------------------------------------------------------------------------------------------|-------------------------------------------------------------------------------------------------------------------------------------------------------------------------------------------------------------------------------------------------------------------------|------------------------------|------|-----|----|-----|-------|
| MethHC: a database of DNA methylation and gene expression in human cancer                                                                                                                                                       | Huang, Wei-Yun; Hsu, Sheng-Da; Huang, Hsi-Yuan; Sun, Yi-Ming; Chou, Chih-Hung; Weng, Shun-Long; Huang, Hsien-Da                                                                                                                                                         | NUCLEIC ACIDS RESEARCH       | 2015 | 43  | D1 | 149 | 24,83 |
| Long Noncoding RNA in Cancer: Wiring Signaling Circuitry                                                                                                                                                                        | Lin, Chunru; Yang, Liuqing                                                                                                                                                                                                                                              | TRENDS IN CELL BIOLOGY       | 2018 | 28  | 4  | 145 | 48,33 |
| Implementing Genome-Driven Oncology                                                                                                                                                                                             | Hyman, David M.; Taylor, Barry S.; Baselga, Jose                                                                                                                                                                                                                        | CELL                         | 2017 | 168 | 4  | 145 | 36,25 |
| A Biopsy-based 17-gene Genomic Prostate Score Predicts Recurrence After Radical Prostatectomy and Adverse Surgical Pathology in a Racially Diverse Population of Men with Clinically Low- and Intermediate-risk Prostate Cancer | Cullen, Jennifer; Rosner, Inger L.; Brand, Timothy C.; Zhang, Nan; Tsiatis, Athanasios C.; Moncur, Joel; Ali, Amina; Chen, Yongmei; Knezevic, Dejan; Maddala, Tara; Lawrence, H. Jeffrey; Febbo, Phillip G.; Srivastava, Shiv; Sesterhenn, Isabell A.; McLeod, David G. | EUROPEAN UROLOGY             | 2015 | 68  | 1  | 141 | 23,5  |
| Active Surveillance for the Management of Localized Prostate Cancer (Cancer Care Ontario Guideline): American Society of Clinical Oncology Clinical Practice Guideline Endorsement                                              | Chen, Ronald C.; Rumble, R. Bryan; Loblaw, D. Andrew; Finelli, Antonio; Ehdaie, Behfar; Cooperberg, Matthew R.; Morgan, Scott C.; Tyldesley, Scott; Haluschak, John J.; Tan, Winston; Justman, Stewart; Jain, Suneil                                                    | JOURNAL OF CLINICAL ONCOLOGY | 2016 | 34  | 18 | 140 | 28    |
| The Landscape of Circular RNA in Cancer                                                                                                                                                                                         | Vo, Josh N.; Cieslik, Marcin; Zhang, Yajia; Shukla, Sudhanshu; Xiao, Lanbo; Zhang, Yuping; Wu, Yi-Mi; Dhanasekaran, Saravana M.; Engelke, Carl G.; Cao, Xuhong; Robinson, Dan R.; Nesvizhskii, Alexey I.; Chinnaiyan, Arul M.                                           | CELL                         | 2019 | 176 | 4  | 137 | 68,5  |
| Current and future perspectives of liquid biopsies in genomics-driven oncology                                                                                                                                                  | Heitzer, Ellen; Haque, Imran S.; Roberts, Charles E. S.; Speicher, Michael R.                                                                                                                                                                                           | NATURE REVIEWS GENETICS      | 2019 | 20  | 2  | 136 | 68    |

|                                                                                                                                     |                                                                                                                                                                                                                                                                         |                               |      |    |    |     |       |
|-------------------------------------------------------------------------------------------------------------------------------------|-------------------------------------------------------------------------------------------------------------------------------------------------------------------------------------------------------------------------------------------------------------------------|-------------------------------|------|----|----|-----|-------|
| Exosomes secreted under hypoxia enhance invasiveness and stemness of prostate cancer cells by targeting adherens junction molecules | Ramteke, Anand; Ting, Harold; Agarwal, Chapla; Mateen, Samiha; Somasagara, Ranganathan; Hussain, Anowar; Graner, Michael; Frederick, Barbara; Agarwal, Rajesh; Deep, Gagan                                                                                              | MOLECULAR CARCINOGENESIS      | 2015 | 54 | 7  | 135 | 22,5  |
| Genomic Alterations in Cell-Free DNA and Enzalutamide Resistance in Castration-Resistant Prostate Cancer                            | Wyatt, Alexander W.; Azad, Arun A.; Volik, Stanislav V.; Annala, Matti; Beja, Kevin; McConeghy, Brian; Haegert, Anne; Warner, Evan W.; Mo, Fan; Brahmbhatt, Sonal; Shukin, Robert; Le Bihan, Stephane; Gleave, Martin E.; Nykter, Matti; Collins, Colin C.; Chi, Kim N. | JAMA ONCOLOGY                 | 2016 | 2  | 12 | 132 | 26,4  |
| Retinoic acid receptors: From molecular mechanisms to cancer therapy                                                                | di Masi, Alessandra; Leboffe, Loris; De Marinis, Elisabetta; Pagano, Francesca; Cicconi, Laura; Rochette-Egly, Cecile; Lo-Coco, Francesco; Ascenzi, Paolo; Nervi, Clara                                                                                                 | MOLECULAR ASPECTS OF MEDICINE | 2015 | 41 |    | 130 | 21,67 |
| Understanding the Mechanisms of Androgen Deprivation Resistance in Prostate Cancer at the Molecular Level                           | Karantanos, Theodoros; Evans, Christopher P.; Tombal, Bertrand; Thompson, Timothy C.; Montironi, Rodolfo; Isaacs, William B.                                                                                                                                            | EUROPEAN UROLOGY              | 2015 | 67 | 3  | 129 | 21,5  |
| Kinase-targeted cancer therapies: progress, challenges and future directions                                                        | Bhullar, Khushwant S.; Orrego Lagaron, Naiara; McGowan, Eileen M.; Parmar, Indu; Jha, Amitabh; Hubbard, Basil P.; Rupasinghe, H. P. Vasantha                                                                                                                            | MOLECULAR CANCER              | 2018 | 17 |    | 128 | 42,67 |
| Genomic Classifier Identifies Men With Adverse Pathology After Radical Prostatectomy Who Benefit From Adjuvant Radiation Therapy    | Den, Robert B.; Yousefi, Kasra; Trabulsi, Edouard J.; Abdollah, Firas; Choeurng, Voleak; Feng, Felix Y.; Dicker, Adam P.; Lallas, Costas D.; Gomella, Leonard G.; Davicioni, Elai; Karnes, R. Jeffrey                                                                   | JOURNAL OF CLINICAL ONCOLOGY  | 2015 | 33 | 8  | 127 | 21,17 |
| The Role of Cholesterol in Cancer                                                                                                   | Kuzu, Omer F.; Noory, Mohammad A.; Robertson, Gavin P.                                                                                                                                                                                                                  | CANCER RESEARCH               | 2016 | 76 | 8  | 126 | 25,2  |

|                                                                                                                                    |                                                                                                                                                                                                                                                                                                                                                                                                                                                                                                                                                                                                                    |                                                 |      |      |    |     |       |
|------------------------------------------------------------------------------------------------------------------------------------|--------------------------------------------------------------------------------------------------------------------------------------------------------------------------------------------------------------------------------------------------------------------------------------------------------------------------------------------------------------------------------------------------------------------------------------------------------------------------------------------------------------------------------------------------------------------------------------------------------------------|-------------------------------------------------|------|------|----|-----|-------|
| Large oncosomes contain distinct protein cargo and represent a separate functional class of tumor-derived extracellular vesicles   | Minciocchi, Valentina R.; You, Sungyong; Spinelli, Cristiana; Morley, Samantha; Zandian, Mandana; Aspuria, Paul-Joseph; Cavallini, Lorenzo; Ciardiello, Chiara; Sobreiro, Mariana Reis; Morello, Matteo; Kharmate, Geetanjali; Jang, Su Chul; Kim, Dae-Kyum; Hosseini-Beheshti, Elham; Guns, Emma Tomlinson; Gleave, Martin; Gho, Yong Song; Mathivanan, Suresh; Yang, Wei; Freeman, Michael R.; Di Vizio, Dolores                                                                                                                                                                                                 | ONCOTARGET                                      | 2015 | 6    | 13 | 120 | 20    |
| Galectin expression in cancer diagnosis and prognosis: A systematic review                                                         | Thijssen, Victor L.; Heusschen, Roy; Caers, Jo; Griffioen, Arjan W.                                                                                                                                                                                                                                                                                                                                                                                                                                                                                                                                                | BIOCHIMICA ET BIOPHYSICA ACTA-REVIEWS ON CANCER | 2015 | 1855 | 2  | 116 | 19,33 |
| Anticancer Molecular Mechanisms of Resveratrol                                                                                     | Varoni, Elena M.; Lo Faro, Alfredo Fabrizio; Sharifi-Rad, Javad; Iriti, Marcello                                                                                                                                                                                                                                                                                                                                                                                                                                                                                                                                   | FRONTIERS IN NUTRITION                          | 2016 | 3    |    | 115 | 23    |
| Development and Validation of a Scalable Next-Generation Sequencing System for Assessing Relevant Somatic Variants in Solid Tumors | Hovelson, Daniel H.; McDaniel, Andrew S.; Cani, Andi K.; Johnson, Bryan; Rhodes, Kate; Williams, Paul D.; Bandla, Santhoshi; Bien, Geoffrey; Choppa, Paul; Hyland, Fiona; Gottimukkala, Rajesh; Liu, Guoying; Manivannan, Manimozhi; Schageman, Jeoffrey; Ballesteros-Villagrana, Efren; Grasso, Catherine S.; Quist, Michael J.; Yadati, Venkata; Amin, Anmol; Siddiqui, Javed; Betz, Bryan L.; Knudsen, Karen E.; Cooney, Kathleen A.; Feng, Felix Y.; Roh, Michael H.; Nelson, Peter S.; Liu, Chia-Jen; Beer, David G.; Wyngaard, Peter; Chinnaiyan, Arul M.; Sadis, Seth; Rhodes, Daniel R.; Tomlins, Scott A. | NEOPLASIA                                       | 2015 | 17   | 4  | 115 | 19,17 |
| Long Noncoding RNAs in Cancer: From Function to Translation                                                                        | Sahu, Anirban; Singhal, Udit; Chinnaiyan, Arul M.                                                                                                                                                                                                                                                                                                                                                                                                                                                                                                                                                                  | TRENDS IN CANCER                                | 2015 | 1    | 2  | 113 | 18,83 |

|                                                                                                                                      |                                                                                                                                                                                                                                                                                                                                                         |                           |      |    |    |     |       |
|--------------------------------------------------------------------------------------------------------------------------------------|---------------------------------------------------------------------------------------------------------------------------------------------------------------------------------------------------------------------------------------------------------------------------------------------------------------------------------------------------------|---------------------------|------|----|----|-----|-------|
| Cell-free DNA (cfDNA): Clinical Significance and Utility in Cancer Shaped By Emerging Technologies                                   | Volik, Stanislav; Alcaide, Miguel; Morin, Ryan D.; Collins, Colin                                                                                                                                                                                                                                                                                       | MOLECULAR CANCER RESEARCH | 2016 | 14 | 10 | 110 | 22    |
| Circulating Tumor DNA Genomics Correlate with Resistance to Abiraterone and Enzalutamide in Prostate Cancer                          | Annala, Matti; Vandekerkhove, Gillian; Khalaf, Daniel; Taavitsainen, Sinja; Beja, Kevin; Warner, Evan W.; Sunderland, Katherine; Kollmannsberger, Christian; Eigl, Bernhard J.; Finch, Daygen; Oja, Conrad D.; Vergidis, Joanna; Zulfiqar, Muhammad; Azad, Arun A.; Nykter, Matti; Gleave, Martin E.; Wyatt, Alexander W.; Chi, Kim N.                  | CANCER DISCOVERY          | 2018 | 8  | 4  | 108 | 36    |
| Oligometastatic prostate cancer: definitions, clinical outcomes, and treatment considerations                                        | Tosoian, Jeffrey J.; Gorin, Michael A.; Ross, Ashley E.; Pienta, Kenneth J.; Tran, Phuoc T.; Schaeffer, Edward M.                                                                                                                                                                                                                                       | NATURE REVIEWS UROLOGY    | 2017 | 14 | 1  | 108 | 27    |
| Precision diagnostics: moving towards protein biomarker signatures of clinical utility in cancer                                     | Borrebaeck, Carl A. K.                                                                                                                                                                                                                                                                                                                                  | NATURE REVIEWS CANCER     | 2017 | 17 | 3  | 103 | 25,75 |
| Genomic Predictors of Outcome in Prostate Cancer                                                                                     | Bostrom, Peter J.; Bjartell, Anders S.; Catto, James W. F.; Eggener, Scott E.; Lilja, Hans; Loeb, Stacy; Schalken, Jack; Schlomm, Thorsten; Cooperberg, Matthew R.                                                                                                                                                                                      | EUROPEAN UROLOGY          | 2015 | 68 | 6  | 103 | 17,17 |
| Tissue-based Genomics Augments Post-prostatectomy Risk Stratification in a Natural History Cohort of Intermediate- and High-Risk Men | Ross, Ashley E.; Johnson, Michael H.; Yousefi, Kasra; Davicioni, Elai; Netto, George J.; Marchionni, Luigi; Fedor, Helen L.; Glavaris, Stephanie; Choeurng, Voleak; Buerki, Christine; Erho, Nicholas; Lam, Lucia L.; Humphreys, Elizabeth B.; Faraj, Sheila; Bezerra, Stephania M.; Han, Misop; Partin, Alan W.; Trock, Bruce J.; Schaeffer, Edward M. | EUROPEAN UROLOGY          | 2016 | 69 | 1  | 102 | 20,4  |

|                                                                                                                                                         |                                                                                                                                                                                                                                                                                                                                                                                                   |                                                                                 |      |     |     |     |       |
|---------------------------------------------------------------------------------------------------------------------------------------------------------|---------------------------------------------------------------------------------------------------------------------------------------------------------------------------------------------------------------------------------------------------------------------------------------------------------------------------------------------------------------------------------------------------|---------------------------------------------------------------------------------|------|-----|-----|-----|-------|
| Combined Value of Validated Clinical and Genomic Risk Stratification Tools for Predicting Prostate Cancer Mortality in a High-risk Prostatectomy Cohort | Cooperberg, Matthew R.; Davicioni, Elai; Crisan, Anamaria; Jenkins, Robert B.; Ghadessi, Mercedeh; Karnes, R. Jeffrey                                                                                                                                                                                                                                                                             | EUROPEAN UROLOGY                                                                | 2015 | 67  | 2   | 102 | 17    |
| Using data-independent, high-resolution mass spectrometry in protein biomarker research: Perspectives and clinical applications                         | Sajic, Tatjana; Liu, Yansheng; Aebersold, Ruedi                                                                                                                                                                                                                                                                                                                                                   | PROTEOMICS CLINICAL APPLICATIONS                                                | 2015 | 9   | 3-4 | 101 | 16,83 |
| Cholesterol uptake disruption, in association with chemotherapy, is a promising combined metabolic therapy for pancreatic adenocarcinoma                | Guillaumond, Fabienne; Bidaut, Ghislain; Ouaisi, Mehdi; Servais, Stephane; Gouirand, Victoire; Olivares, Orianne; Lac, Sophie; Borge, Laurence; Roques, Julie; Gayet, Odile; Pinault, Michelle; Guimaraes, Cyrille; Nigri, Jeremy; Loncle, Celine; Lavaut, Marie-Noelle; Garcia, Stephane; Tailleux, Anne; Staels, Bart; Calvo, Ezequiel; Tomasini, Richard; Iovanna, Juan Lucio; Vasseur, Sophie | PROCEEDINGS OF THE NATIONAL ACADEMY OF SCIENCES OF THE UNITED STATES OF AMERICA | 2015 | 112 | 8   | 101 | 16,83 |
| Long noncoding RNAs and tumorigenesis: genetic associations, molecular mechanisms, and therapeutic strategies                                           | Zhang, Fan; Zhang, Liang; Zhang, Caiguo                                                                                                                                                                                                                                                                                                                                                           | TUMOR BIOLOGY                                                                   | 2016 | 37  | 1   | 100 | 20    |
| Mindfulness Meditation for Younger Breast Cancer Survivors: A Randomized Controlled Trial                                                               | Bower, Julianne E.; Crosswell, Alexandra D.; Stanton, Annette L.; Crespi, Catherine M.; Winston, Diana; Arevalo, Jesusa; Ma, Jeffrey; Cole, Steve W.; Ganz, Patricia A.                                                                                                                                                                                                                           | CANCER                                                                          | 2015 | 121 | 8   | 100 | 16,67 |
| Targeted protein degradation by PROTACs                                                                                                                 | Neklesa, Taavi K.; Winkler, James D.; Crews, Craig M.                                                                                                                                                                                                                                                                                                                                             | PHARMACOLOGY & THERAPEUTICS                                                     | 2017 | 174 |     | 99  | 24,75 |

|                                                                                                          |                                                                                                                                                                                                                                                                                                                                                                                                                                                                                                                                                                                                                                                                                                                                                                                                                                                                          |               |      |   |    |    |      |
|----------------------------------------------------------------------------------------------------------|--------------------------------------------------------------------------------------------------------------------------------------------------------------------------------------------------------------------------------------------------------------------------------------------------------------------------------------------------------------------------------------------------------------------------------------------------------------------------------------------------------------------------------------------------------------------------------------------------------------------------------------------------------------------------------------------------------------------------------------------------------------------------------------------------------------------------------------------------------------------------|---------------|------|---|----|----|------|
| Breast Cancer Risk From Modifiable and Nonmodifiable Risk Factors Among White Women in the United States | Maas, Paige; Barrdahl, Myrto; Joshi, Amit D.; Auer, Paul L.; Gaudet, Mia M.; Milne, Roger L.; Schumacher, Fredrick R.; Anderson, William F.; Check, David; Chattopadhyay, Subham; Baglietto, Laura; Berg, Christine D.; Chanock, Stephen J.; Cox, David G.; Figueroa, Jonine D.; Gail, Mitchell H.; Graubard, Barry I.; Haiman, Christopher A.; Hankinson, Susan E.; Hoover, Robert N.; Isaacs, Claudine; Kolonel, Laurence N.; Le Marchand, Loic; Lee, I-Min; Lindstrom, Sara; Overvad, Kim; Romieu, Isabelle; Sanchez, Maria-Jose; Southey, Melissa C.; Stram, Daniel O.; Tumino, Rosario; VanderWeele, Tyler J.; Willett, Walter C.; Zhang, Shumin; Buring, Julie E.; Canzian, Federico; Gapstur, Susan M.; Henderson, Brian E.; Hunter, David J.; Giles, Graham G.; Prentice, Ross L.; Ziegler, Regina G.; Kraft, Peter; Garcia-Closas, Montse; Chatterjee, Nilanjan | JAMA ONCOLOGY | 2016 | 2 | 10 | 98 | 19,6 |
|----------------------------------------------------------------------------------------------------------|--------------------------------------------------------------------------------------------------------------------------------------------------------------------------------------------------------------------------------------------------------------------------------------------------------------------------------------------------------------------------------------------------------------------------------------------------------------------------------------------------------------------------------------------------------------------------------------------------------------------------------------------------------------------------------------------------------------------------------------------------------------------------------------------------------------------------------------------------------------------------|---------------|------|---|----|----|------|

|                                                                                                  |                                                                                                                                                                                                                                                                                                                                                                                                                                                                                                                                                                                                                                                                                                                                                                                                                                                                                                                                                                                                                                                                                                                                                                                                                                                                                                                                            |                                                      |      |    |   |    |    |
|--------------------------------------------------------------------------------------------------|--------------------------------------------------------------------------------------------------------------------------------------------------------------------------------------------------------------------------------------------------------------------------------------------------------------------------------------------------------------------------------------------------------------------------------------------------------------------------------------------------------------------------------------------------------------------------------------------------------------------------------------------------------------------------------------------------------------------------------------------------------------------------------------------------------------------------------------------------------------------------------------------------------------------------------------------------------------------------------------------------------------------------------------------------------------------------------------------------------------------------------------------------------------------------------------------------------------------------------------------------------------------------------------------------------------------------------------------|------------------------------------------------------|------|----|---|----|----|
| The OncoArray Consortium: A Network for Understanding the Genetic Architecture of Common Cancers | Amos, Christopher I.; Dennis, Joe; Wang, Zhaoming; Byun, Jinyoung; Schumacher, Fredrick R.; Gayther, Simon A.; Casey, Graham; Hunter, David J.; Sellers, Thomas A.; Gruber, Stephen B.; Dunning, Alison M.; Michailidou, Kyriaki; Fachal, Laura; Doheny, Kimberly; Spurdle, Amanda B.; Li, Yafang; Xiao, Xiangjun; Romm, Jane; Pugh, Elizabeth; Coetzee, Gerhard A.; Hazelett, Dennis J.; Bojesen, Stig E.; Caga-Anan, Charlissee; Haiman, Christopher A.; Kamal, Ahsan; Luccarini, Craig; Tessier, Daniel; Vincent, Daniel; Bacot, Francois; Van den Berg, David J.; Nelson, Stefanie; Demetriades, Stephen; Goldgar, David E.; Couch, Fergus J.; Forman, Judith L.; Giles, Graham G.; Conti, David V.; Bickeboeller, Heike; Risch, Angela; Waldenberger, Melanie; Brueske-Hohlfeld, Irene; Hicks, Belynda D.; Ling, Hua; McGuffog, Lesley; Lee, Andrew; Kuchenbaecker, Karoline; Soucy, Penny; Manz, Judith; Cunningham, Julie M.; Butterbach, Katja; Kote-Jarai, Zsofia; Kraft, Peter; FitzGerald, Liesel; Lindstrom, Sara; Adams, Marcia; McKay, James D.; Phelan, Catherine M.; Benlloch, Sara; Kelemen, Linda E.; Brennan, Paul; Riggan, Marjorie; O'Mara, Tracy A.; Shen, Hongbing; Shi, Yongyong; Thompson, Deborah J.; Goodman, Marc T.; Nielsen, Sune F.; Berchuck, Andrew; Laboissiere, Sylvie; Schmit, Stephanie L.; Shelford, | CANCER<br>EPIDEMIOLOGY<br>BIOMARKERS &<br>PREVENTION | 2017 | 26 | 1 | 96 | 24 |
|--------------------------------------------------------------------------------------------------|--------------------------------------------------------------------------------------------------------------------------------------------------------------------------------------------------------------------------------------------------------------------------------------------------------------------------------------------------------------------------------------------------------------------------------------------------------------------------------------------------------------------------------------------------------------------------------------------------------------------------------------------------------------------------------------------------------------------------------------------------------------------------------------------------------------------------------------------------------------------------------------------------------------------------------------------------------------------------------------------------------------------------------------------------------------------------------------------------------------------------------------------------------------------------------------------------------------------------------------------------------------------------------------------------------------------------------------------|------------------------------------------------------|------|----|---|----|----|



|                                                                                                                                                                                                           |                                                                                                                                                                                                                                                                                                                                                                                                                                                                                                               |                          |      |    |    |    |       |
|-----------------------------------------------------------------------------------------------------------------------------------------------------------------------------------------------------------|---------------------------------------------------------------------------------------------------------------------------------------------------------------------------------------------------------------------------------------------------------------------------------------------------------------------------------------------------------------------------------------------------------------------------------------------------------------------------------------------------------------|--------------------------|------|----|----|----|-------|
| A Genomic Classifier Improves Prediction of Metastatic Disease Within 5 Years After Surgery in Node-negative High-risk Prostate Cancer Patients Managed by Radical Prostatectomy Without Adjuvant Therapy | Klein, Eric A.; Yousefi, Kasra; Haddad, Zaid; Choeurng, Voleak; Buerki, Christine; Stephenson, Andrew J.; Li, Jianbo; Kattan, Michael W.; Magi-Galluzzi, Cristina; Davicioni, Elai                                                                                                                                                                                                                                                                                                                            | EUROPEAN UROLOGY         | 2015 | 67 | 4  | 96 | 16    |
| A common classification framework for neuroendocrine neoplasms: an International Agency for Research on Cancer (IARC) and World Health Organization (WHO) expert consensus proposal                       | Rindi, Guido; Klimstra, David S.; Abedi-Ardekani, Behnoush; Asa, Sylvia L.; Bosman, Frederik T.; Brambilla, Elisabeth; Busam, Klaus J.; de Krijger, Ronald R.; Dietel, Manfred; El-Naggar, Adel K.; Fernandez-Cuesta, Lynnette; Kloeppel, Guenter; McCluggage, W. Glenn; Moch, Holger; Ohgaki, Hiroko; Rakha, Emad A.; Reed, Nicholas S.; Rous, Brian A.; Sasano, Hironobu; Scarpa, Aldo; Scoazec, Jean-Yves; Travis, William D.; Tallini, Giovanni; Trouillas, Jacqueline; van Krieken, J. Han; Cree, Ian A. | MODERN PATHOLOGY         | 2018 | 31 | 12 | 95 | 31,67 |
| Subclonal Genomic Architectures of Primary and Metastatic Colorectal Cancer Based on Intratumoral Genetic Heterogeneity                                                                                   | Kim, Tae-Min; Jung, Seung-Hyun; An, Chang Hyeok; Lee, Sung Hak; Baek, In-Pyo; Kim, Min Sung; Park, Sung-Won; Rhee, Je-Keun; Lee, Sug-Hyung; Chung, Yeun-Jun                                                                                                                                                                                                                                                                                                                                                   | CLINICAL CANCER RESEARCH | 2015 | 21 | 19 | 94 | 15,67 |
| Augmenting antitumor immune responses with epigenetic modifying agents                                                                                                                                    | Heninger, Erika; Krueger, Timothy E. G.; Lang, Joshua M.                                                                                                                                                                                                                                                                                                                                                                                                                                                      | FRONTIERS IN IMMUNOLOGY  | 2015 | 6  |    | 94 | 15,67 |

|                                                                                                                                                |                                                                                                                                                                                                                                                                                                                                                                                                                                                                                                                                                                                                                                                 |                                |      |    |    |    |       |
|------------------------------------------------------------------------------------------------------------------------------------------------|-------------------------------------------------------------------------------------------------------------------------------------------------------------------------------------------------------------------------------------------------------------------------------------------------------------------------------------------------------------------------------------------------------------------------------------------------------------------------------------------------------------------------------------------------------------------------------------------------------------------------------------------------|--------------------------------|------|----|----|----|-------|
| Clinical and Genomic Characterization of Treatment-Emergent Small-Cell Neuroendocrine Prostate Cancer: A Multi-institutional Prospective Study | Aggarwal, Rahul; Huang, Jiaoti; Alumkal, Joshi J.; Zhang, Li; Feng, Felix Y.; Thomas, George V.; Weinstein, Alana S.; Friedl, Verena; Zhang, Can; Witte, Owen N.; Lloyd, Paul; Gleave, Martin; Evans, Christopher P.; Youngren, Jack; Beer, Tomasz M.; Rettig, Matthew; Wong, Christopher K.; True, Lawrence; Foye, Adam; Playdle, Denise; Ryan, Charles J.; Lara, Primo; Chi, Kim N.; Uzunangelov, Vlado; Sokolov, Artem; Newton, Yulia; Beltran, Himisha; Demichelis, Francesca; Rubin, Mark A.; Stuart, Joshua M.; Small, Eric J.                                                                                                            | JOURNAL OF CLINICAL ONCOLOGY   | 2018 | 36 | 24 | 93 | 31    |
| Genomic instability in human cancer: Molecular insights and opportunities for therapeutic attack and prevention through diet and nutrition     | Ferguson, Lynnette R.; Chen, Helen; Collins, Andrew R.; Connell, Marisa; Damia, Giovanna; Dasgupta, Santanu; Malhotra, Meenakshi; Meeker, Alan K.; Amedei, Amedeo; Amin, Amr; Ashraf, S. Salman; Aquilano, Katia; Azmi, Asfar S.; Bhakta, Dipita; Bilsland, Alan; Boosani, Chandra S.; Chen, Sophie; Ciriolo, Maria Rosa; Fujii, Hiromasa; Guha, Gunjan; Halicka, Dorota; Helferich, William G.; Keith, W. Nicol; Mohammed, Sulma I.; Niccolai, Elena; Yang, Xujuan; Honoki, Kanya; Parslow, Virginia R.; Prakash, Satya; Rezazadeh, Sarallah; Shackelford, Rodney E.; Sidransky, David; Tran, Phuoc T.; Yang, Eddy S.; Maxwell, Christopher A. | SEMINARS IN CANCER BIOLOGY     | 2015 | 35 |    | 93 | 15,5  |
| SUMOylation-Mediated Regulation of Cell Cycle Progression and Cancer                                                                           | Eifler, Karolin; Vertegaal, Alfred C. O.                                                                                                                                                                                                                                                                                                                                                                                                                                                                                                                                                                                                        | TRENDS IN BIOCHEMICAL SCIENCES | 2015 | 40 | 12 | 93 | 15,5  |
| Therapeutic Targeting of Long Non-Coding RNAs in Cancer                                                                                        | Arun, Gayatri; Diermeier, Sarah D.; Spector, David L.                                                                                                                                                                                                                                                                                                                                                                                                                                                                                                                                                                                           | TRENDS IN MOLECULAR MEDICINE   | 2018 | 24 | 3  | 91 | 30,33 |

|                                                                                                                                         |                                                                                                                                                                                                                                                                                                                                                   |                                 |      |     |    |    |       |
|-----------------------------------------------------------------------------------------------------------------------------------------|---------------------------------------------------------------------------------------------------------------------------------------------------------------------------------------------------------------------------------------------------------------------------------------------------------------------------------------------------|---------------------------------|------|-----|----|----|-------|
| Clinical implications of PTEN loss in prostate cancer                                                                                   | Jamaspishvili, Tamara; Berman, David M.; Ross, Ashley E.; Scher, Howard I.; De Marzo, Angelo M.; Squire, Jeremy A.; Lotan, Tamara L.                                                                                                                                                                                                              | NATURE REVIEWS UROLOGY          | 2018 | 15  | 4  | 90 | 30    |
| Landscape of Phosphatidylinositol-3-Kinase Pathway Alterations Across 19 784 Diverse Solid Tumors                                       | Millis, Sherri Z.; Ikeda, Sadakatsu; Reddy, Sandeep; Gatalica, Zoran; Kurzrock, Razelle                                                                                                                                                                                                                                                           | JAMA ONCOLOGY                   | 2016 | 2   | 12 | 89 | 17,8  |
| The role of exosomes and miRNAs in drug-resistance of cancer cells                                                                      | Bach, Duc-Hiep; Hong, Ji-Young; Park, Hyen Joo; Lee, Sang Kook                                                                                                                                                                                                                                                                                    | INTERNATIONAL JOURNAL OF CANCER | 2017 | 141 | 2  | 86 | 21,5  |
| Population-based multicase-control study in common tumors in Spain (MCC-Spain): rationale and study design                              | Castano-Vinyals, Gemma; Aragones, Nuria; Perez-Gomez, Beatriz; Martin, Vicente; Llorca, Javier; Moreno, Victor; Altzibar, Jone M.; Ardanaz, Eva; de Sanjose, Silvia; Juan Jimenez-Moleon, Jose; Tardon, Adonina; Alguacil, Juan; Peiro, Rosana; Marcos-Gragera, Rafael; Navarro, Carmen; Pollan, Marina; Kogevinas, Manolis                       | GACETA SANITARIA                | 2015 | 29  | 4  | 86 | 14,33 |
| The long noncoding RNA Malat1: Its physiological and pathophysiological functions                                                       | Zhang, Xuejing; Hamblin, Milton H.; Yin, Ke-Jie                                                                                                                                                                                                                                                                                                   | RNA BIOLOGY                     | 2017 | 14  | 12 | 85 | 21,25 |
| Integration of copy number and transcriptomics provides risk stratification in prostate cancer: A discovery and validation cohort study | Ross-Adams, H.; Lamb, A. D.; Dunning, M. J.; Halim, S.; Lindberg, J.; Massie, C. M.; Egevad, L. A.; Russell, R.; Ramos-Montoya, A.; Vowler, S. L.; Sharma, N. L.; Kay, J.; Whitaker, H.; Clark, J.; Hurst, R.; Gnanapragasam, V. J.; Shah, N. C.; Warren, A. Y.; Cooper, C. S.; Lynch, A. G.; Stark, R.; Mills, I. G.; Groenberg, H.; Neal, D. E. | EBIOMEDICINE                    | 2015 | 2   | 9  | 85 | 14,17 |

|                                                                                                                                                   |                                                                                                                                                                                                                                                                                                                                                                                                                                                                  |                           |      |     |    |    |       |
|---------------------------------------------------------------------------------------------------------------------------------------------------|------------------------------------------------------------------------------------------------------------------------------------------------------------------------------------------------------------------------------------------------------------------------------------------------------------------------------------------------------------------------------------------------------------------------------------------------------------------|---------------------------|------|-----|----|----|-------|
| Development and validation of a 24-gene predictor of response to postoperative radiotherapy in prostate cancer: a matched, retrospective analysis | Zhao, Shuang G.; Chang, S. Laura; Spratt, Daniel E.; Erho, Nicholas; Yu, Menggang; Ashab, Hussam Al-Deen; Alshalalfa, Mohammed; Speers, Corey; Tomlins, Scott A.; Davicioni, Elai; Dicker, Adam P.; Carroll, Peter R.; Cooperberg, Matthew R.; Freedland, Stephen J.; Karnes, R. Jeffrey; Ross, Ashley E.; Schaeffer, Edward M.; Den, Robert B.; Nguyen, Paul L.; Feng, Felix Y.                                                                                 | LANCET ONCOLOGY           | 2016 | 17  | 11 | 84 | 16,8  |
| Identification of prostate cancer biomarkers in urinary exosomes                                                                                  | Overbye, Anders; Skotland, Tore; Koehler, Christian J.; Thiede, Bernd; Seierstad, Therese; Berge, Viktor; Sandvig, Kirsten; Llorente, Alicia                                                                                                                                                                                                                                                                                                                     | ONCOTARGET                | 2015 | 6   | 30 | 84 | 14    |
| Technical challenges of working with extracellular vesicles                                                                                       | Ramirez, Marcel I.; Amorim, Maria G.; Gadelha, Catarina; Milic, Ivana; Welsh, Joshua A.; Freitas, Vanessa M.; Nawaz, Muhammad; Akbar, Naveed; Couch, Yvonne; Makin, Laura; Cooke, Fiona; Vettore, Andre L.; Batista, Patricia X.; Freezor, Roberta; Pezuk, Julia A.; Rosa-Fernandes, Livia; Carreira, Ana Claudia O.; Devitt, Andrew; Jacobs, Laura; Silva, Israel T.; Coakley, Gillian; Nunes, Diana N.; Carter, Dave; Palmisano, Giuseppe; Dias-Neto, Emmanuel | NANOSCALE                 | 2018 | 10  | 3  | 83 | 27,67 |
| MYC Deregulation in Primary Human Cancers                                                                                                         | Kalkat, Manpreet; De Melo, Jason; Hickman, Katherine Ashley; Lourenco, Corey; Redel, Cornelia; Resetca, Diana; Tamachi, Aaliya; Tu, William B.; Penn, Linda Z.                                                                                                                                                                                                                                                                                                   | GENES                     | 2017 | 8   | 6  | 82 | 20,5  |
| Genome-wide association studies of cancer: current insights and future perspectives                                                               | Sud, Amit; Kinnersley, Ben; Houlston, Richard S.                                                                                                                                                                                                                                                                                                                                                                                                                 | NATURE REVIEWS CANCER     | 2017 | 17  | 11 | 80 | 20    |
| Tumour-suppressive microRNA-144-5p directly targets CCNE1/2 as potential prognostic markers in bladder cancer                                     | Matsushita, R.; Seki, N.; Chiyomaru, T.; Inoguchi, S.; Ishihara, T.; Goto, Y.; Nishikawa, R.; Mataka, H.; Tatarano, S.; Itesako, T.; Nakagawa, M.; Enokida, H.                                                                                                                                                                                                                                                                                                   | BRITISH JOURNAL OF CANCER | 2015 | 113 | 2  | 80 | 13,33 |

|                                                                                                                                              |                                                                                                                                                                                                                                            |                                        |      |    |    |    |       |
|----------------------------------------------------------------------------------------------------------------------------------------------|--------------------------------------------------------------------------------------------------------------------------------------------------------------------------------------------------------------------------------------------|----------------------------------------|------|----|----|----|-------|
| PTEN loss is associated with upgrading of prostate cancer from biopsy to radical prostatectomy                                               | Lotan, Tamara L.; Carvalho, Filipe L. F.; Peskoe, Sarah B.; Hicks, Jessica L.; Good, Jennifer; Fedor, Helen L.; Humphreys, Elizabeth; Han, Misop; Platz, Elizabeth A.; Squire, Jeremy A.; De Marzo, Angelo M.; Berman, David M.            | MODERN PATHOLOGY                       | 2015 | 28 | 1  | 80 | 13,33 |
| Clinical utility of circulating non-coding RNAs - an update                                                                                  | Anfossi, Simone; Babayan, Anna; Pantel, Klaus; Calin, George A.                                                                                                                                                                            | NATURE REVIEWS CLINICAL ONCOLOGY       | 2018 | 15 | 9  | 79 | 26,33 |
| Androgen receptor variant-driven prostate cancer: clinical implications and therapeutic targeting                                            | Antonarakis, E. S.; Armstrong, A. J.; Dehm, S. M.; Luo, J.                                                                                                                                                                                 | PROSTATE CANCER AND PROSTATIC DISEASES | 2016 | 19 | 3  | 79 | 15,8  |
| Decipher Genomic Classifier Measured on Prostate Biopsy Predicts Metastasis Risk                                                             | Klein, Eric A.; Haddad, Zaid; Yousefi, Kasra; Lam, Lucia L. C.; Wang, Qiqi; Choeurng, Voleak; Palmer-Aronsten, Beatrix; Buerki, Christine; Davicioni, Elai; Li, Jianbo; Kattan, Michael W.; Stephenson, Andrew J.; Magi-Galluzzi, Cristina | UROLOGY                                | 2016 | 90 |    | 79 | 15,8  |
| Update on Systemic Prostate Cancer Therapies: Management of Metastatic Castration-resistant Prostate Cancer in the Era of Precision Oncology | Nuhn, Philipp; De Bono, Johann S.; Fizazi, Karim; Freedland, Stephen J.; Grilli, Maurizio; Kantoff, Philip W.; Sonpavde, Guru; Sternberg, Cora N.; Yegnasubramanian, Srinivasan; Antonarakis, Emmanuel S.                                  | EUROPEAN UROLOGY                       | 2019 | 75 | 1  | 78 | 39    |
| Inferring expressed genes by whole-genome sequencing of plasma DNA                                                                           | Ulz, Peter; Thallinger, Gerhard G.; Auer, Martina; Graf, Ricarda; Kashofer, Karl; Jahn, Stephan W.; Abete, Luca; Pristauz, Ganda; Petru, Edgar; Geigl, Jochen B.; Heitzer, Ellen; Speicher, Michael R.                                     | NATURE GENETICS                        | 2016 | 48 | 10 | 78 | 15,6  |

|                                                                                                                                                           |                                                                                                                                                                                                                                                                   |                                  |      |      |   |    |       |
|-----------------------------------------------------------------------------------------------------------------------------------------------------------|-------------------------------------------------------------------------------------------------------------------------------------------------------------------------------------------------------------------------------------------------------------------|----------------------------------|------|------|---|----|-------|
| Combined Tumor Suppressor Defects Characterize Clinically Defined Aggressive Variant Prostate Cancers                                                     | Aparicio, Ana M.; Shen, Li; Tapia, Elsa Li Ning; Lu, Jing-Fang; Chen, Hsiang-Chun; Zhang, Jiexin; Wu, Guanglin; Wang, Xuemei; Troncoso, Patricia; Corn, Paul; Thompson, Timothy C.; Broom, Bradley; Baggerly, Keith; Maity, Sankar N.; Logothetis, Christopher J. | CLINICAL CANCER RESEARCH         | 2016 | 22   | 6 | 78 | 15,6  |
| Automated Multiplexed ECL Immunoarrays for Cancer Biomarker Proteins                                                                                      | Kadimisetty, Karteek; Malla, Spundana; Sardesai, Naimish P.; Joshi, Amit A.; Faria, Ronaldo C.; Lee, Norman H.; Rusling, James F.                                                                                                                                 | ANALYTICAL CHEMISTRY             | 2015 | 87   | 8 | 78 | 13    |
| DNA Repair in Prostate Cancer: Biology and Clinical Implications                                                                                          | Mateo, Joaquin; Boysen, Gunther; Barbieri, Christopher E.; Bryant, Helen E.; Castro, Elena; Nelson, Pete S.; Olmos, David; Pritchard, Colin C.; Rubin, Mark A.; de Bono, Johann S.                                                                                | EUROPEAN UROLOGY                 | 2017 | 71   | 3 | 77 | 19,25 |
| Tumor-suppressive microRNA-223 inhibits cancer cell migration and invasion by targeting ITGA3/ITGB1 signaling in prostate cancer                          | Kurozumi, Akira; Goto, Yusuke; Matsushita, Ryosuke; Fukumoto, Ichiro; Kato, Mayuko; Nishikawa, Rika; Sakamoto, Shinichi; Enokida, Hideki; Nakagawa, Masayuki; Ichikawa, Tomohiko; Seki, Naohiko                                                                   | CANCER SCIENCE                   | 2016 | 107  | 1 | 77 | 15,4  |
| MiRNA-based therapeutic intervention of cancer                                                                                                            | Naidu, Srivatsava; Magee, Peter; Garofalo, Michela                                                                                                                                                                                                                | JOURNAL OF HEMATOLOGY & ONCOLOGY | 2015 | 8    |   | 77 | 12,83 |
| Long Noncoding RNAs as New Architects in Cancer Epigenetics, Prognostic Biomarkers, and Potential Therapeutic Targets                                     | Meseure, Didier; Alsibai, Kinan Drak; Nicolas, Andre; Bieche, Ivan; Morillon, Antonin                                                                                                                                                                             | BIOMED RESEARCH INTERNATIONAL    | 2015 | 2015 |   | 77 | 12,83 |
| Intratumoral and Intertumoral Genomic Heterogeneity of Multifocal Localized Prostate Cancer Impacts Molecular Classifications and Genomic Prognosticators | Wei, Lei; Wang, Jianmin; Lampert, Erika; Schlanger, Simon; DePriest, Adam D.; Hu, Qiang; Gomez, Eduardo Cortes; Murakam, Mitsuko; Glenn, Sean T.; Conroy, Jeffrey; Morrison, Carl; Azabdaftari, Gissou; Mohler, James L.; Liu, Song; Heemers, Hannelore V.        | EUROPEAN UROLOGY                 | 2017 | 71   | 2 | 76 | 19    |

|                                                                                                                                       |                                                                                                                                                                                                                                                                                                                                             |                                   |      |      |    |    |       |
|---------------------------------------------------------------------------------------------------------------------------------------|---------------------------------------------------------------------------------------------------------------------------------------------------------------------------------------------------------------------------------------------------------------------------------------------------------------------------------------------|-----------------------------------|------|------|----|----|-------|
| miR-195 Inhibits Tumor Progression by Targeting RPS6KB1 in Human Prostate Cancer                                                      | Cai, Chao; Chen, Qing-Biao; Han, Zhao-Dong; Zhang, Yan-Qiong; He, Hui-Chan; Chen, Jia-Hong; Chen, Yan-Ru; Yang, Sheng-Bang; Wu, Yong-Ding; Zeng, Yan-Ru; Qin, Guo-Qiang; Liang, Yu-Xiang; Dai, Qi-Shan; Jiang, Fu-Neng; Wu, Shu-lin; Zeng, Guo-Hua; Zhong, Wei-De; Wu, Chin-Lee                                                             | CLINICAL CANCER RESEARCH          | 2015 | 21   | 21 | 76 | 12,67 |
| Extracellular vesicles: potential applications in cancer diagnosis, prognosis, and epidemiology                                       | Verma, Mukesh; Lam, Tram Kim; Hebert, Elizabeth; Divi, Rao L.                                                                                                                                                                                                                                                                               | BMC CLINICAL PATHOLOGY            | 2015 | 15   |    | 75 | 12,5  |
| Circulating tumor DNA and liquid biopsy: opportunities, challenges, and recent advances in detection technologies                     | Gorgannezhad, Lena; Umer, Muhammad; Islam, Md. Nazmul; Nam-Trung Nguyen; Shiddiky, Muhammad J. A.                                                                                                                                                                                                                                           | LAB ON A CHIP                     | 2018 | 18   | 8  | 74 | 24,67 |
| Long Noncoding RNAs in Cancer and Therapeutic Potential                                                                               | Renganathan, Arun; Felley-Bosco, Emanuela                                                                                                                                                                                                                                                                                                   | LONG NON CODING RNA BIOLOGY       | 2017 | 1008 |    | 74 | 18,5  |
| High expression of AFAP1-AS1 is associated with poor survival and short-term recurrence in pancreatic ductal adenocarcinoma           | Ye, Yibiao; Chen, Jie; Zhou, Yu; Fu, Zhiqiang; Zhou, Quanbo; Wang, YingXue; Gao, Wenchao; Zheng, ShangYou; Zhao, Xiaohui; Chen, Tao; Chen, Rufu                                                                                                                                                                                             | JOURNAL OF TRANSLATIONAL MEDICINE | 2015 | 13   |    | 74 | 12,33 |
| Molecular Pathways: Novel Approaches for Improved Therapeutic Targeting of Hedgehog Signaling in Cancer Stem Cells                    | Justilien, Verline; Fields, Alan P.                                                                                                                                                                                                                                                                                                         | CLINICAL CANCER RESEARCH          | 2015 | 21   | 3  | 74 | 12,33 |
| Intrinsic BET inhibitor resistance in SPOP-mutated prostate cancer is mediated by BET protein stabilization and AKT-mTORC1 activation | Zhang, Pingzhao; Wang, Dejie; Zhao, Yu; Ren, Shancheng; Gao, Kun; Ye, Zhenqing; Wang, Shangqian; Pan, Chun-Wu; Zhu, Yasheng; Yan, Yuqian; Yang, Yinhui; Wu, Di; He, Yundong; Zhang, Jun; Lu, Daru; Liu, Xiuping; Yu, Long; Zhao, Shimin; Li, Yao; Lin, Dong; Wang, Yuzhuo; Wang, Liguu; Chen, Yu; Sun, Yinghao; Wang, Chenji; Huang, Haojie | NATURE MEDICINE                   | 2017 | 23   | 9  | 72 | 18    |

|                                                                                                                                           |                                                                                                                                                                                                                                                                                                                                                                                                                                |                                 |      |     |   |    |      |
|-------------------------------------------------------------------------------------------------------------------------------------------|--------------------------------------------------------------------------------------------------------------------------------------------------------------------------------------------------------------------------------------------------------------------------------------------------------------------------------------------------------------------------------------------------------------------------------|---------------------------------|------|-----|---|----|------|
| Phosphoproteome Integration Reveals Patient-Specific Networks in Prostate Cancer                                                          | Drake, Justin M.; Paull, Evan O.; Graham, Nicholas A.; Lee, John K.; Smith, Bryan A.; Titz, Bjoern; Stoyanova, Tanya; Faltermeyer, Claire M.; Uzunangelov, Vladislav; Carlin, Daniel E.; Fleming, Daniel Teo; Wong, Christopher K.; Newton, Yulia; Sudha, Sud; Vashisht, Ajay A.; Huang, Jiaoti; Wohlschlegel, James A.; Graeber, Thomas G.; Witte, Owen N.; Stuart, Joshua M.                                                 | CELL                            | 2016 | 166 | 4 | 72 | 14,4 |
| PSA and beyond: alternative prostate cancer biomarkers                                                                                    | Saini, Sharanjot                                                                                                                                                                                                                                                                                                                                                                                                               | CELLULAR ONCOLOGY               | 2016 | 39  | 2 | 72 | 14,4 |
| Metabolomic analysis of prostate cancer risk in a prospective cohort: The alpha-tocolpherol, beta-carotene cancer prevention (ATBC) study | Mondul, Alison M.; Moore, Steven C.; Weinstein, Stephanie J.; Karoly, Edward D.; Sampson, Joshua N.; Albanes, Demetrius                                                                                                                                                                                                                                                                                                        | INTERNATIONAL JOURNAL OF CANCER | 2015 | 137 | 9 | 72 | 12   |
| Exosomes Released from Breast Cancer Carcinomas Stimulate Cell Movement                                                                   | Harris, Dinari A.; Patel, Sajni H.; Gucek, Marjan; Hendrix, An; Westbroek, Wendy; Taraska, Justin W.                                                                                                                                                                                                                                                                                                                           | PLOS ONE                        | 2015 | 10  | 3 | 72 | 12   |
| The Interaction between Epigenetics, Nutrition and the Development of Cancer                                                              | Bishop, Karen S.; Ferguson, Lynnette R.                                                                                                                                                                                                                                                                                                                                                                                        | NUTRIENTS                       | 2015 | 7   | 2 | 72 | 12   |
| Inhibition of fatty acid desaturation is detrimental to cancer cell survival in metabolically compromised environments                    | Peck, Barrie; Schug, Zachary T.; Zhang, Qifeng; Dankworth, Beatrice; Jones, Dylan T.; Smethurst, Elizabeth; Patel, Rachana; Mason, Susan; Jiang, Ming; Saunders, Rebecca; Howell, Michael; Mitter, Richard; Spencer-Dene, Bradley; Stamp, Gordon; McGarry, Lynn; James, Daniel; Shanks, Emma; Aboagye, Eric O.; Critchlow, Susan E.; Leung, Hing Y.; Harris, Adrian L.; Wakelam, Michael J. O.; Gottlieb, Eyal; Schulze, Almut | CANCER & METABOLISM             | 2016 | 4   |   | 71 | 14,2 |



|                                                                                                                        |                                                                                                                                                                                                                                                                                                                                                                         |                                                                                 |      |     |    |    |       |
|------------------------------------------------------------------------------------------------------------------------|-------------------------------------------------------------------------------------------------------------------------------------------------------------------------------------------------------------------------------------------------------------------------------------------------------------------------------------------------------------------------|---------------------------------------------------------------------------------|------|-----|----|----|-------|
| Genome-wide CRISPR screen identifies HNRNPL as a prostate cancer dependency regulating RNA splicing                    | Fei, Teng; Chen, Yiwen; Xiao, Tengfei; Li, Wei; Cato, Laura; Zhang, Peng; Cotter, Maura B.; Bowden, Michaela; Lis, Rosina T.; Zhao, Shuang G.; Wu, Qiu; Feng, Felix Y.; Loda, Massimo; He, Housheng Hansen; Liu, X. Shirley; Brown, Myles                                                                                                                               | PROCEEDINGS OF THE NATIONAL ACADEMY OF SCIENCES OF THE UNITED STATES OF AMERICA | 2017 | 114 | 26 | 70 | 17,5  |
| A Prospective Investigation of PTEN Loss and ERG Expression in Lethal Prostate Cancer                                  | Ahearn, Thomas U.; Pettersson, Andreas; Ebot, Ericka M.; Gerke, Travis; Graff, Rebecca E.; Morais, Carlos L.; Hicks, Jessica L.; Wilson, Kathryn M.; Rider, Jennifer R.; Sesso, Howard D.; Fiorentino, Michelangelo; Flavin, Richard; Finn, Stephen; Giovannucci, Edward L.; Loda, Massimo; Stampfer, Meir J.; De Marzo, Angelo M.; Mucci, Lorelei A.; Lotan, Tamara L. | JNCI-JOURNAL OF THE NATIONAL CANCER INSTITUTE                                   | 2016 | 108 | 2  | 70 | 14    |
| Novel Biomarker Signature That May Predict Aggressive Disease in African American Men With Prostate Cancer             | Yamoah, Kosj; Johnson, Michael H.; Choeurng, Voleak; Faisal, Farzana A.; Yousefi, Kasra; Haddad, Zaid; Ross, Ashley E.; Alshalafa, Mohammed; Den, Robert; Lal, Priti; Feldman, Michael; Dicker, Adam P.; Klein, Eric A.; Davicioni, Elai; Rebbeck, Timothy R.; Schaeffer, Edward M.                                                                                     | JOURNAL OF CLINICAL ONCOLOGY                                                    | 2015 | 33  | 25 | 70 | 11,67 |
| Targeting the adaptive molecular landscape of castration-resistant prostate cancer                                     | Wyatt, Alexander W.; Gleave, Martin E.                                                                                                                                                                                                                                                                                                                                  | EMBO MOLECULAR MEDICINE                                                         | 2015 | 7   | 7  | 70 | 11,67 |
| Role of exosomal proteins in cancer diagnosis                                                                          | Li, Weihua; Li, Chuanyun; Zhou, Tong; Liu, Xiuhong; Liu, Xiaoni; Li, Xiuhui; Chen, Dexi                                                                                                                                                                                                                                                                                 | MOLECULAR CANCER                                                                | 2017 | 16  |    | 69 | 17,25 |
| SRRM4 Drives Neuroendocrine Transdifferentiation of Prostate Adenocarcinoma Under Androgen Receptor Pathway Inhibition | Li, Yanan; Donmez, Nilgun; Sahinalp, Cenk; Xie, Ning; Wang, Yuwei; Xue, Hui; Mo, Fan; Beltran, Himisha; Gleave, Martin; Wang, Yuzhuo; Collins, Colin; Dong, Xuesen                                                                                                                                                                                                      | EUROPEAN UROLOGY                                                                | 2017 | 71  | 1  | 69 | 17,25 |

|                                                                                                                                          |                                                                                                                                                                                                                                                                                                                                                                                                                         |                                             |      |     |    |    |       |
|------------------------------------------------------------------------------------------------------------------------------------------|-------------------------------------------------------------------------------------------------------------------------------------------------------------------------------------------------------------------------------------------------------------------------------------------------------------------------------------------------------------------------------------------------------------------------|---------------------------------------------|------|-----|----|----|-------|
| Development and Clinical Validation of an In Situ Biopsy-Based Multimarker Assay for Risk Stratification in Prostate Cancer              | Blume-Jensen, Peter; Berman, David M.; Rimm, David L.; Shipitsin, Michail; Putzi, Mathew; Nifong, Thomas P.; Small, Clayton; Choudhury, Sibgat; Capela, Teresa; Coupal, Louis; Ernst, Christina; Hurley, Aeron; Kaprelyants, Alex; Chang, Hua; Giladi, Eldar; Nardone, Julie; Dunyak, James; Loda, Massimo; Klein, Eric A.; Magi-Galluzzi, Cristina; Latour, Mathieu; Epstein, Jonathan I.; Kantoff, Philip; Saad, Fred | CLINICAL CANCER RESEARCH                    | 2015 | 21  | 11 | 69 | 11,5  |
| The association between germline BRCA2 variants and sensitivity to platinum-based chemotherapy among men with metastatic prostate cancer | Pomerantz, Mark M.; Spisak, Sandor; Jia, Li; Cronin, Angel M.; Csabai, Istvan; Ledet, Elisa; Sartor, A. Oliver; Rainville, Irene; O'Connor, Edward P.; Herbert, Zachary T.; Szallasi, Zoltan; Oh, William K.; Kantoff, Philip W.; Garber, Judy E.; Schrag, Deborah; Kibel, Adam S.; Freedman, Matthew L.                                                                                                                | CANCER                                      | 2017 | 123 | 18 | 68 | 17    |
| Truncation and constitutive activation of the androgen receptor by diverse genomic rearrangements in prostate cancer                     | Henzler, Christine; Li, Yingming; Yang, Rendong; McBride, Terri; Ho, Yeung; Sprenger, Cynthia; Liu, Gang; Coleman, Ilsa; Lakely, Bryce; Li, Rui; Ma, Shihong; Landman, Sean R.; Kumar, Vipin; Hwang, Tae Hyun; Raj, Ganesh V.; Higano, Celestia S.; Morrissey, Colm; Nelson, Peter S.; Plymate, Stephen R.; Dehm, Scott M.                                                                                              | NATURE COMMUNICATIONS                       | 2016 | 7   |    | 68 | 13,6  |
| MicroRNAs as Biomarkers for Diagnosis, Prognosis and Theranostics in Prostate Cancer                                                     | Bertoli, Gloria; Cava, Claudia; Castiglioni, Isabella                                                                                                                                                                                                                                                                                                                                                                   | INTERNATIONAL JOURNAL OF MOLECULAR SCIENCES | 2016 | 17  | 3  | 68 | 13,6  |
| Landscape of gene fusions in epithelial cancers: seq and ye shall find                                                                   | Kumar-Sinha, Chandan; Kalyana-Sundaram, Shanker; Chinnaiyan, Arul M.                                                                                                                                                                                                                                                                                                                                                    | GENOME MEDICINE                             | 2015 | 7   |    | 68 | 11,33 |
| Therapeutic Implications for Overcoming Radiation Resistance in Cancer Therapy                                                           | Kim, Byeong Mo; Hong, Yunkyung; Lee, Seunghoon; Liu, Pengda; Lim, Ji Hong; Lee, Yong Heon; Lee, Tae Ho; Chang, Kyu Tae; Hong, Yonggeun                                                                                                                                                                                                                                                                                  | INTERNATIONAL JOURNAL OF MOLECULAR SCIENCES | 2015 | 16  | 11 | 68 | 11,33 |

|                                                                                                                                       |                                                                                                                                                                                                                                                                                                                                 |                                   |      |     |      |    |       |
|---------------------------------------------------------------------------------------------------------------------------------------|---------------------------------------------------------------------------------------------------------------------------------------------------------------------------------------------------------------------------------------------------------------------------------------------------------------------------------|-----------------------------------|------|-----|------|----|-------|
| Assessing the Clinical Impact of Risk Prediction Models With Decision Curves: Guidance for Correct Interpretation and Appropriate Use | Kerr, Kathleen F.; Brown, Marshall D.; Zhu, Kehao; Janes, Holly                                                                                                                                                                                                                                                                 | JOURNAL OF CLINICAL ONCOLOGY      | 2016 | 34  | 21   | 67 | 13,4  |
| A novel multi-tissue RNA diagnostic of healthy ageing relates to cognitive health status                                              | Sood, Sanjana; Gallagher, Iain J.; Lunnon, Katie; Rullman, Eric; Keohane, Aoife; Crossland, Hannah; Phillips, Bethan E.; Cederholm, Tommy; Jensen, Thomas; van Loon, Luc J. C.; Lannfelt, Lars; Kraus, William E.; Atherton, Philip J.; Howard, Robert; Gustafsson, Thomas; Hodges, Angela; Timmons, James A.                   | GENOME BIOLOGY                    | 2015 | 16  |      | 67 | 11,17 |
| Synthetic essentiality of chromatin remodelling factor CHD1 in PTEN-deficient cancer                                                  | Zhao, Di; Lu, Xin; Wang, Guocan; Lan, Zhengdao; Liao, Wenting; Li, Jun; Liang, Xin; Chen, Jasper Robin; Shah, Sagar; Shang, Xiaoying; Tang, Ming; Deng, Pingna; Dey, Prasenjit; Chakravarti, Deepavali; Chen, Peiwen; Spring, Denise J.; Navone, Nora M.; Troncoso, Patricia; Zhang, Jianhua; Wang, Y. Alan; DePinho, Ronald A. | NATURE                            | 2017 | 542 | 7642 | 65 | 16,25 |
| SOX9 drives WNT pathway activation in prostate cancer                                                                                 | Ma, Fen; Ye, Huihui; He, Housheng Hansen; Gerrin, Sean J.; Chen, Sen; Tanenbaum, Benjamin A.; Cai, Changmeng; Sowalsky, Adam G.; He, Lingfeng; Wang, Hongyun; Balk, Steven P.; Yuan, Xin                                                                                                                                        | JOURNAL OF CLINICAL INVESTIGATION | 2016 | 126 | 5    | 65 | 13    |
| ROR-gamma drives androgen receptor expression and represents a therapeutic target in castration-resistant prostate cancer             | Wang, Junjian; Zou, June X.; Xue, Xiaoqian; Cai, Demin; Zhang, Yan; Duan, Zhijian; Xiang, Qiuping; Yang, Joy C.; Louie, Maggie C.; Borowsky, Alexander D.; Gao, Allen C.; Evans, Christopher P.; Lam, Kit S.; Xu, Jianzhen; Kung, Hsing-Jien; Evans, Ronald M.; Xu, Yong; Chen, Hong-Wu                                         | NATURE MEDICINE                   | 2016 | 22  | 5    | 65 | 13    |

|                                                                                                                                                                     |                                                                                                                                                                                                                                                                                                                                                                                                                                                   |                                           |      |     |      |    |       |
|---------------------------------------------------------------------------------------------------------------------------------------------------------------------|---------------------------------------------------------------------------------------------------------------------------------------------------------------------------------------------------------------------------------------------------------------------------------------------------------------------------------------------------------------------------------------------------------------------------------------------------|-------------------------------------------|------|-----|------|----|-------|
| Stem cell and neurogenic gene-expression profiles link prostate basal cells to aggressive prostate cancer                                                           | Zhang, Dingxiao; Park, Daechan; Zhong, Yi; Lu, Yue; Rycaj, Kiera; Gong, Shuai; Chen, Xin; Liu, Xin; Chao, Hsueh-Ping; Whitney, Pamela; Calhoun-Davis, Tammy; Takata, Yoko; Shen, Jianjun; Iyer, Vishwanath R.; Tang, Dean G.                                                                                                                                                                                                                      | NATURE COMMUNICATIONS                     | 2016 | 7   |      | 65 | 13    |
| MicroRNA expression signature of castration-resistant prostate cancer: the microRNA-221/222 cluster functions as a tumour suppressor and disease progression marker | Goto, Yusuke; Kojima, Satoko; Nishikawa, Rika; Kurozumi, Akira; Kato, Mayuko; Enokida, Hideki; Matsushita, Ryosuke; Yamazaki, Kazuto; Ishida, Yasuo; Nakagawa, Masayuki; Naya, Yukio; Ichikawa, Tomohiko; Seki, Naohiko                                                                                                                                                                                                                           | BRITISH JOURNAL OF CANCER                 | 2015 | 113 | 7    | 65 | 10,83 |
| SPOP mutation leads to genomic instability in prostate cancer                                                                                                       | Boysen, Gunther; Barbieri, Christopher E.; Prandi, Davide; Blattner, Mirjam; Chae, Sung-Suk; Dahija, Arun; Nataraj, Srilakshmi; Huang, Dennis; Marotz, Clarisse; Xu, Limei; Huang, Julie; Lecca, Paola; Chhangawala, Sagar; Liu, Deli; Zhou, Pengbo; Sboner, Andrea; de Bono, Johann S.; Demichelis, Francesca; Houvras, Yariv; Rubin, Mark A.                                                                                                    | ELIFE                                     | 2015 | 4   |      | 65 | 10,83 |
| CRISPR screens identify genomic ribonucleotides as a source of PARP-trapping lesions                                                                                | Zimmermann, Michal; Murina, Olga; Reijns, Martin A. M.; Agathangelou, Angelo; Challis, Rachel; Tarnauskaite, Zygimante; Muir, Morwenna; Fluteau, Adeline; Aregger, Michael; McEwan, Andrea; Yuan, Wei; Clarke, Matthew; Lambros, Maryou B.; Paneesha, Shankara; Moss, Paul; Chandrashekhara, Megha; Angers, Stephane; Moffat, Jason; Brunton, Valerie G.; Hart, Traver; de Bono, Johann; Stankovic, Tatjana; Jackson, Andrew P.; Durocher, Daniel | NATURE                                    | 2018 | 559 | 7713 | 64 | 21,33 |
| The role of long noncoding RNAs in cancer: the dark matter matters                                                                                                  | Hu, Xiaowen; Sood, Anil K.; Dang, Chi V.; Zhang, Lin                                                                                                                                                                                                                                                                                                                                                                                              | CURRENT OPINION IN GENETICS & DEVELOPMENT | 2018 | 48  |      | 64 | 21,33 |

|                                                                                                                                                 |                                                                                                                                                                     |                                 |      |     |    |    |       |
|-------------------------------------------------------------------------------------------------------------------------------------------------|---------------------------------------------------------------------------------------------------------------------------------------------------------------------|---------------------------------|------|-----|----|----|-------|
| The NOTCH1-MYC highway toward T-cell acute lymphoblastic leukemia                                                                               | Sanchez-Martin, Marta; Ferrando, Adolfo                                                                                                                             | BLOOD                           | 2017 | 129 | 9  | 64 | 16    |
| Higher plasma levels of lysophosphatidylcholine 18:0 are related to a lower risk of common cancers in a prospective metabolomics study          | Kuehn, Tilman; Floegel, Anna; Sookthai, Disorn; Johnson, Theron; Rolle-Kampczyk, Ulrike; Otto, Wolfgang; von Bergen, Martin; Boeing, Heiner; Kaaks, Rudolf          | BMC MEDICINE                    | 2016 | 14  |    | 64 | 12,8  |
| Integrated Proteomic and Glycoproteomic Analyses of Prostate Cancer Cells Reveal Glycoprotein Alteration in Protein Abundance and Glycosylation | Shah, Punit; Wang, Xiangchun; Yang, Weiming; Eshghi, Shadi Toghi; Sun, Shisheng; Hoti, Naseruddin; Chen, Lijun; Yang, Shuang; Pasay, Jered; Rubin, Abby; Zhang, Hui | MOLECULAR & CELLULAR PROTEOMICS | 2015 | 14  | 10 | 64 | 10,67 |

|                                                                                                    |                                                                                                                                                                                                                                                                                                                                                                                                                                                                                                                                                                                                                                                                                                                                                                                                                                                                                                                                                                                                                                                                                                                                                                                                                                                                                                              |                        |      |    |    |    |       |
|----------------------------------------------------------------------------------------------------|--------------------------------------------------------------------------------------------------------------------------------------------------------------------------------------------------------------------------------------------------------------------------------------------------------------------------------------------------------------------------------------------------------------------------------------------------------------------------------------------------------------------------------------------------------------------------------------------------------------------------------------------------------------------------------------------------------------------------------------------------------------------------------------------------------------------------------------------------------------------------------------------------------------------------------------------------------------------------------------------------------------------------------------------------------------------------------------------------------------------------------------------------------------------------------------------------------------------------------------------------------------------------------------------------------------|------------------------|------|----|----|----|-------|
| Sequencing of prostate cancers identifies new cancer genes, routes of progression and drug targets | Wedge, David C.; Gundem, Gunes; Mitchell, Thomas; Woodcock, Dan J.; Martincorena, Inigo; Ghor, Mohammed; Zamora, Jorge; Butler, Adam; Whitaker, Hayley; Kote-Jarai, Zsofia; Alexandrov, Ludmil B.; Van Loo, Peter; Massie, Charlie E.; Dentre, Stefan; Warren, Anne Y.; Verrill, Clare; Berney, Dan M.; Dennis, Nening; Merson, Sue; Hawkins, Steve; Howat, William; Lu, Yong-Jie; Lambert, Adam; Kay, Jonathan; Kremeyer, Barbara; Karaszi, Katalin; Luxton, Hayley; Camacho, Niedzica; Marsden, Luke; Edwards, Sandra; Matthews, Lucy; Bo, Valeria; Leongamornlert, Daniel; McLaren, Stuart; Ng, Anthony; Yu, Yongwei; Zhang, Hongwei; Dadaev, Tokhir; Thomas, Sarah; Easton, Douglas F.; Ahmed, Mahbub; Bancroft, Elizabeth; Fisher, Cyril; Livni, Naomi; Nicol, David; Tavaré, Simon; Gill, Pelvender; Greenman, Christopher; Khoo, Vincent; Van As, Nicholas; Kumar, Pardeep; Ogden, Christopher; Cahill, Declan; Thompson, Alan; Mayer, Erik; Rowe, Edward; Dudderidge, Tim; Gnanapragasam, Vincent; Shah, Nimish C.; Raine, Keiran; Jones, David; Menzies, Andrew; Stebbings, Lucy; Teague, Jon; Hazell, Steven; Corbishley, Cathy; de Bono, Johann; Attard, Gerhardt; Isaacs, William; Visakorpi, Tapio; Fraser, Michael; Boutros, Paul C.; Bristow, Robert G.; Workman, Paul; Sander, Chris; Hamdy, | NATURE GENETICS        | 2018 | 50 | 5  | 62 | 20,67 |
| WNT signalling in prostate cancer                                                                  | Murillo-Garzon, Virginia; Kypta, Robert                                                                                                                                                                                                                                                                                                                                                                                                                                                                                                                                                                                                                                                                                                                                                                                                                                                                                                                                                                                                                                                                                                                                                                                                                                                                      | NATURE REVIEWS UROLOGY | 2017 | 14 | 11 | 62 | 15,5  |

|                                                                                                         |                                                                                                                                                                                                                |                                                                                                  |      |     |      |    |       |
|---------------------------------------------------------------------------------------------------------|----------------------------------------------------------------------------------------------------------------------------------------------------------------------------------------------------------------|--------------------------------------------------------------------------------------------------|------|-----|------|----|-------|
| Accession of Tumor Heterogeneity by Multiplex Transcriptome Profiling of Single Circulating Tumor Cells | Gorges, Tobias M.; Kuske, Andra; Roeck, Katharina; Mauermann, Oliver; Mueller, Volkmar; Peine, Sven; Verpoort, Karl; Novosadova, Vendula; Kubista, Mikael; Riethdorf, Sabine; Pantel, Klaus                    | CLINICAL CHEMISTRY                                                                               | 2016 | 62  | 11   | 62 | 12,4  |
| The role of epigenetics in genetic and environmental epidemiology                                       | Ladd-Acosta, Christine; Fallin, M. Daniele                                                                                                                                                                     | EPIGENOMICS                                                                                      | 2016 | 8   | 2    | 62 | 12,4  |
| The use of exome capture RNA-seq for highly degraded RNA with application to clinical cancer sequencing | Cieslik, Marcin; Chugh, Rashmi; Wu, Yi-Mi; Wu, Ming; Brennan, Christine; Lonigro, Robert; Su, Fengyun; Wang, Rui; Siddiqui, Javed; Mehra, Rohit; Cao, Xuhong; Lucas, David; Chinnaiyan, Arul M.; Robinson, Dan | GENOME RESEARCH                                                                                  | 2015 | 25  | 9    | 62 | 10,33 |
| MEXPRESS: visualizing expression, DNA methylation and clinical TCGA data                                | Koch, Alexander; De Meyer, Tim; Jeschke, Jana; Van Criekinge, Wim                                                                                                                                              | BMC GENOMICS                                                                                     | 2015 | 16  |      | 62 | 10,33 |
| The elements of life and medicines                                                                      | Chellan, Prinessa; Sadler, Peter J.                                                                                                                                                                            | PHILOSOPHICAL TRANSACTIONS OF THE ROYAL SOCIETY A-MATHEMATICAL PHYSICAL AND ENGINEERING SCIENCES | 2015 | 373 | 2037 | 62 | 10,33 |
| Functional significance of aberrantly expressed microRNAs in prostate cancer                            | Goto, Yusuke; Kurozumi, Akira; Enokida, Hideki; Ichikawa, Tomohiko; Seki, Naohiko                                                                                                                              | INTERNATIONAL JOURNAL OF UROLOGY                                                                 | 2015 | 22  | 3    | 62 | 10,33 |
| Serum-Based miRNAs in the Prediction and Detection of Recurrence in Melanoma Patients                   | Fleming, Nathaniel H.; Zhong, Judy; da Silva, Ines Pires; de Miera, Eleazar Vega-Saenz; Brady, Bobbi; Han, Sung Won; Hanniford, Doug; Wang, Jinhua; Shapiro, Richard L.; Hernando, Eva; Osman, Iman            | CANCER                                                                                           | 2015 | 121 | 1    | 62 | 10,33 |

|                                                                                                               |                                                                                                                                                                                                                                                                                                                           |                                                 |      |      |   |    |       |
|---------------------------------------------------------------------------------------------------------------|---------------------------------------------------------------------------------------------------------------------------------------------------------------------------------------------------------------------------------------------------------------------------------------------------------------------------|-------------------------------------------------|------|------|---|----|-------|
| Concordance of Circulating Tumor DNA and Matched Metastatic Tissue Biopsy in Prostate Cancer                  | Wyatt, Alexander W.; Annala, Matti; Aggarwal, Rahul; Beja, Kevin; Feng, Felix; Youngren, Jack; Foye, Adam; Lloyd, Paul; Nykter, Matti; Beer, Tomasz M.; Alumkal, Joshi J.; Thomas, George V.; Reiter, Robert E.; Rettig, Matthew B.; Evans, Christopher P.; Gao, Allen C.; Chi, Kim N.; Small, Eric J.; Gleave, Martin E. | JNCI-JOURNAL OF THE NATIONAL CANCER INSTITUTE   | 2018 | 110  | 1 | 61 | 20,33 |
| Understanding the Effectiveness of Natural Compound Mixtures in Cancer through Their Molecular Mode of Action | Aung, Thazin Nwe; Qu, Zhipeng; Kortschak, R. Daniel; Adelson, David L.                                                                                                                                                                                                                                                    | INTERNATIONAL JOURNAL OF MOLECULAR SCIENCES     | 2017 | 18   | 3 | 61 | 15,25 |
| Biology and evolution of poorly differentiated neuroendocrine tumors                                          | Rickman, David S.; Beltran, Himisha; Demichelis, Francesca; Rubin, Mark A.                                                                                                                                                                                                                                                | NATURE MEDICINE                                 | 2017 | 23   | 6 | 60 | 15    |
| JAK-STAT signaling in cancer: From cytokines to non-coding genome                                             | Pencik, Jan; Ha Thi Thanh Pham; Schmoellerl, Johannes; Javaheri, Tahereh; Schlederer, Michaela; Culig, Zoran; Merkel, Olaf; Moriggl, Richard; Grebien, Florian; Kenner, Lukas                                                                                                                                             | CYTOKINE                                        | 2016 | 87   |   | 60 | 12    |
| Regulation of prostate cancer progression by the tumor microenvironment                                       | Shiao, Stephen L.; Chu, Gina Chia-Yi; Chung, Leland W. K.                                                                                                                                                                                                                                                                 | CANCER LETTERS                                  | 2016 | 380  | 1 | 60 | 12    |
| Analysis of DNA methylation in cancer: location revisited                                                     | Koch, Alexander; Joosten, Sophie C.; Feng, Zheng; de Ruijter, Tim C.; Draht, Muriel X.; Melotte, Veerle; Smits, Kim M.; Veeck, Jurgen; Herman, James G.; Van Neste, Leander; Van Criekinge, Wim; De Meyer, Tim; van Engeland, Manon                                                                                       | NATURE REVIEWS CLINICAL ONCOLOGY                | 2018 | 15   | 7 | 59 | 19,67 |
| Targeting EZH2 in cancer therapy                                                                              | Yamagishi, Makoto; Uchimar, Kaoru                                                                                                                                                                                                                                                                                         | CURRENT OPINION IN ONCOLOGY                     | 2017 | 29   | 5 | 59 | 14,75 |
| Tumor evolution: Linear, branching, neutral or punctuated?                                                    | Davis, Alexander; Gao, Ruli; Navin, Nicholas                                                                                                                                                                                                                                                                              | BIOCHIMICA ET BIOPHYSICA ACTA-REVIEWS ON CANCER | 2017 | 1867 | 2 | 59 | 14,75 |



|                                                                                                                                 |                                                                                                                                                                                                                                                                                                                                                                                                                                                                                                                                                                                                                                                                                                                                                                                                                      |                                                                                 |      |     |    |    |       |
|---------------------------------------------------------------------------------------------------------------------------------|----------------------------------------------------------------------------------------------------------------------------------------------------------------------------------------------------------------------------------------------------------------------------------------------------------------------------------------------------------------------------------------------------------------------------------------------------------------------------------------------------------------------------------------------------------------------------------------------------------------------------------------------------------------------------------------------------------------------------------------------------------------------------------------------------------------------|---------------------------------------------------------------------------------|------|-----|----|----|-------|
| The Epithelial-to-Mesenchymal Transition-Like Process in Glioblastoma: An Updated Systematic Review and In Silico Investigation | Iser, Isabele C.; Pereira, Mariana B.; Lenz, Guido; Wink, Marcia R.                                                                                                                                                                                                                                                                                                                                                                                                                                                                                                                                                                                                                                                                                                                                                  | MEDICINAL RESEARCH REVIEWS                                                      | 2017 | 37  | 2  | 59 | 14,75 |
| Genomic, pathological, and clinical heterogeneity as drivers of personalized medicine in prostate cancer                        | Fraser, Michael; Berlin, Alejandro; Bristow, Robert G.; van der Kwast, Theodorus                                                                                                                                                                                                                                                                                                                                                                                                                                                                                                                                                                                                                                                                                                                                     | UROLOGIC ONCOLOGY-SEMINARS AND ORIGINAL INVESTIGATIONS                          | 2015 | 33  | 2  | 59 | 9,83  |
| Genomic correlates of clinical outcome in advanced prostate cancer                                                              | Abida, Wassim; Cyrta, Joanna; Heller, Glenn; Prandi, Davide; Armenia, Joshua; Coleman, Ilsa; Cieslik, Marcin; Benelli, Matteo; Robinson, Dan; Van Allen, Eliezer M.; Sboner, Andrea; Fedrizzi, Tarcisio; Mosquera, Juan Miguel; Robinson, Brian D.; De Sarkar, Navonil; Kunju, Lakshmi P.; Tomlins, Scott; Wu, Yi Mi; Rodrigues, Daniel Nava; Loda, Massimo; Gopalan, Anuradha; Reuter, Victor E.; Pritchard, Colin C.; Mateo, Joaquin; Bianchini, Diletta; Miranda, Susana; Carreira, Suzanne; Rescigno, Pasquale; Filipenko, Julie; Vinson, Jacob; Montgomery, Robert B.; Beltran, Himisha; Heath, Elisabeth I.; Scher, Howard I.; Kantoff, Philip W.; Taplin, Mary-ellen; Schultz, Nikolaus; deBono, Johann S.; Demichelis, Francesca; Nelson, Peter S.; Rubin, Mark A.; Chinnaiyan, Arul M.; Sawyers, Charles L. | PROCEEDINGS OF THE NATIONAL ACADEMY OF SCIENCES OF THE UNITED STATES OF AMERICA | 2019 | 116 | 23 | 58 | 29    |

|                                                                                                        |                                                                                                                                                                                                                                                                                                                                                                                                                                                                                                                                                                                                                                                                                                                                                                                                                               |                  |      |     |      |    |       |
|--------------------------------------------------------------------------------------------------------|-------------------------------------------------------------------------------------------------------------------------------------------------------------------------------------------------------------------------------------------------------------------------------------------------------------------------------------------------------------------------------------------------------------------------------------------------------------------------------------------------------------------------------------------------------------------------------------------------------------------------------------------------------------------------------------------------------------------------------------------------------------------------------------------------------------------------------|------------------|------|-----|------|----|-------|
| Widespread and Functional RNA Circularization in Localized Prostate Cancer                             | Chen, Sujun; Huang, Vincent; Xu, Xin; Livingstone, Julie; Soares, Fraser; Jeon, Jouhyun; Zeng, Yong; Hua, Junjie Tony; Petricca, Jessica; Guo, Haiyang; Wang, Miranda; Yousif, Fouad; Zhang, Yuzhe; Donmez, Nilgun; Ahmed, Musaddeque; Volik, Stas; Lapuk, Anna; Chua, Melvin L. K.; Heisler, Lawrence E.; Foucal, Adrien; Fox, Natalie S.; Fraser, Michael; Bhandari, Vinayak; Shiah, Yu-Jia; Guan, Jiansheng; Li, Jixi; Orain, Michele; Picard, Valerie; Hovington, Helene; Bergeron, Alain; Lacombe, Louis; Fradet, Yves; Tetu, Bernard; Liu, Stanley; Feng, Felix; Wu, Xue; Shao, Yang W.; Komor, Malgorzata A.; Sahinalp, Cenk; Collins, Colin; Hoogstrate, Youri; de Jong, Mark; Fijneman, Remond J. A.; Fei, Teng; Jenster, Guido; van der Kwast, Theodorus; Bristow, Robert G.; Boutros, Paul C.; He, Housheng Hansen | CELL             | 2019 | 176 | 4    | 58 | 29    |
| Minimal functional driver gene heterogeneity among untreated metastases                                | Reiter, Johannes G.; Makohon-Moore, Alvin P.; Gerold, Jeffrey M.; Heyde, Alexander; Attiyeh, Marc A.; Kohutek, Zachary A.; Tokheim, Collin J.; Brown, Alexia; DeBlasio, Rayne M.; Niyazov, Juliana; Zucker, Amanda; Karchin, Rachel; Kinzler, Kenneth W.; Iacobuzio-Donahue, Christine A.; Vogelstein, Bert; Nowak, Martin A.                                                                                                                                                                                                                                                                                                                                                                                                                                                                                                 | SCIENCE          | 2018 | 361 | 6406 | 58 | 19,33 |
| A Pan-cancer Analysis of the Expression and Clinical Relevance of Small Nucleolar RNAs in Human Cancer | Gong, Jing; Li, Yajuan; Liu, Chun-Jie; Xiang, Yu; Li, Chunlai; Ye, Youqiong; Zhang, Zhao; Hawke, David H.; Park, Peter K.; Diao, Lixia; Putkey, John A.; Yang, Liuqing; Guo, An-Yuan; Lin, Chunru; Han, Leng                                                                                                                                                                                                                                                                                                                                                                                                                                                                                                                                                                                                                  | CELL REPORTS     | 2017 | 21  | 7    | 58 | 14,5  |
| Prostate cancer, PI3K, PTEN and prognosis                                                              | Wise, Helen M.; Hermida, Miguel A.; Leslie, Nicholas R.                                                                                                                                                                                                                                                                                                                                                                                                                                                                                                                                                                                                                                                                                                                                                                       | CLINICAL SCIENCE | 2017 | 131 | 3    | 58 | 14,5  |

|                                                                                                                                  |                                                                                                                                                                                                                                                                                                                                                                                                                                                                                                                |                          |      |    |    |    |      |
|----------------------------------------------------------------------------------------------------------------------------------|----------------------------------------------------------------------------------------------------------------------------------------------------------------------------------------------------------------------------------------------------------------------------------------------------------------------------------------------------------------------------------------------------------------------------------------------------------------------------------------------------------------|--------------------------|------|----|----|----|------|
| Molecular profiling of prostate cancer derived exosomes may reveal a predictive signature for response to docetaxel              | Kharaziha, Pedram; Chioureas, Dimitris; Rutishauser, Dorothea; Baltatzis, George; Lennartsson, Lena; Fonseca, Pedro; Azimi, Alireza; Hultenby, Kjell; Zubarev, Roman; Ullen, Anders; Yachnin, Jeffrey; Nilsson, Sten; Panaretakis, Theocharis                                                                                                                                                                                                                                                                  | ONCOTARGET               | 2015 | 6  | 25 | 58 | 9,67 |
| Utilization of a Genomic Classifier for Prediction of Metastasis Following Salvage Radiation Therapy after Radical Prostatectomy | Freedland, Stephen J.; Choeurng, Voleak; Howard, Lauren; De Hoedt, Amanda; du Plessis, Marguerite; Yousefi, Kasra; Lam, Lucia L.; Buerki, Christine; Ra, Seong; Robbins, Bruce; Trabulsi, Edouard J.; Shah, Nikhil L.; Abdollah, Firas; Feng, Felix Y.; Davicioni, Elai; Dicker, Adam P.; Karnes, Robert J.; Den, Robert B.                                                                                                                                                                                    | EUROPEAN UROLOGY         | 2016 | 70 | 4  | 57 | 11,4 |
| Genetic polymorphisms and paclitaxel- or docetaxel-induced toxicities: A systematic review                                       | Frederiks, C. N.; Lam, S. W.; Guchelaar, H. J.; Boven, E.                                                                                                                                                                                                                                                                                                                                                                                                                                                      | CANCER TREATMENT REVIEWS | 2015 | 41 | 10 | 57 | 9,5  |
| Associations of Luminal and Basal Subtyping of Prostate Cancer With Prognosis and Response to Androgen Deprivation Therapy       | Zhao, Shuang G.; Chang, S. Laura; Erho, Nicholas; Yu, Menggang; Lehrer, Jonathan; Alshalalfa, Mohammed; Speers, Corey; Cooperberg, Matthew R.; Kim, Won; Ryan, Charles J.; Den, Robert B.; Freedland, Stephen J.; Posadas, Edwin; Sandler, Howard; Klein, Eric A.; Black, Peter; Seiler, Roland; Tomlins, Scott A.; Chinnaiyan, Arul M.; Jenkins, Robert B.; Davicioni, Elai; Ross, Ashley E.; Schaeffer, Edward M.; Nguyen, Paul L.; Carroll, Peter R.; Karnes, R. Jeffrey; Spratt, Daniel E.; Feng, Felix Y. | JAMA ONCOLOGY            | 2017 | 3  | 12 | 56 | 14   |
| Pan-cancer analysis of bi-allelic alterations in homologous recombination DNA repair genes                                       | Riaz, Nadeem; Bleclua, Pedro; Lim, Raymond S.; Shen, Ronglai; Higginson, Daniel S.; Weinhold, Nils; Norton, Larry; Weigelt, Britta; Powell, Simon N.; Reis-Filho, Jorge S.                                                                                                                                                                                                                                                                                                                                     | NATURE COMMUNICATIONS    | 2017 | 8  |    | 56 | 14   |

|                                                                                                                                  |                                                                                                                                                                                                                                                                                                                                                                                                                                                                                                                                                                                                                                                                                                                                                              |                              |      |    |    |    |       |
|----------------------------------------------------------------------------------------------------------------------------------|--------------------------------------------------------------------------------------------------------------------------------------------------------------------------------------------------------------------------------------------------------------------------------------------------------------------------------------------------------------------------------------------------------------------------------------------------------------------------------------------------------------------------------------------------------------------------------------------------------------------------------------------------------------------------------------------------------------------------------------------------------------|------------------------------|------|----|----|----|-------|
| Proteomic profiling of NCI-60 extracellular vesicles uncovers common protein cargo and cancer type-specific biomarkers           | Hurwitz, Stephanie N.; Rider, Mark A.; Bundy, Joseph L.; Liu, Xia; Singh, Rakesh K.; Meckes, David G., Jr.                                                                                                                                                                                                                                                                                                                                                                                                                                                                                                                                                                                                                                                   | ONCOTARGET                   | 2016 | 7  | 52 | 56 | 11,2  |
| Dual-strand tumor-suppressor microRNA-145 (miR-145-5p and miR-145-3p) coordinately targeted MTDH in lung squamous cell carcinoma | Mataki, Hiroko; Seki, Naohiko; Mizuno, Keiko; Nohata, Nijiro; Kamikawaji, Kazuto; Kumamoto, Tomohiro; Koshizuka, Keiichi; Goto, Yusuke; Inoue, Hiromasa                                                                                                                                                                                                                                                                                                                                                                                                                                                                                                                                                                                                      | ONCOTARGET                   | 2016 | 7  | 44 | 56 | 11,2  |
| LncRNAs as new biomarkers to differentiate triple negative breast cancer from non-triple negative breast cancer                  | Lv, Mingming; Xu, Pengfei; Wu, Ying; Huang, Lei; Li, Wenqu; Lv, Shanshan; Wu, Xiaowei; Zeng, Xin; Shen, Rong; Jia, Xuemei; Yin, Yongmei; Gu, Yun; Yuan, Hongyan; Xie, Hui; Fu, Ziyi                                                                                                                                                                                                                                                                                                                                                                                                                                                                                                                                                                          | ONCOTARGET                   | 2016 | 7  | 11 | 54 | 10,8  |
| Prostate cancer in East Asia: evolving trend over the last decade                                                                | Zhu, Yao; Wang, Hong-Kai; Qu, Yuan-Yuan; Ye, Ding-Wei                                                                                                                                                                                                                                                                                                                                                                                                                                                                                                                                                                                                                                                                                                        | ASIAN JOURNAL OF ANDROLOGY   | 2015 | 17 | 1  | 54 | 9     |
| Development and Validation of a Novel Integrated Clinical-Genomic Risk Group Classification for Localized Prostate Cancer        | Spratt, Daniel E.; Zhang, Jingbin; Santiago-Jimenez, Maria; Dess, Robert T.; Davis, John W.; Den, Robert B.; Dicker, Adam P.; Kane, Christopher J.; Pollack, Alan; Stoyanova, Radka; Abdollah, Firas; Ross, Ashley E.; Cole, Adam; Uchio, Edward; Randall, Josh M.; Hao Nguyen; Zhao, Shuang G.; Mehra, Rohit; Glass, Andrew G.; Lam, Lucia L. C.; Chelliserry, Jijumon; du Plessis, Marguerite; Choeurng, Voleak; Aranes, Maria; Kolisnik, Tyler; Margrave, Jennifer; Alter, Jason; Jordan, Jennifer; Buerki, Christine; Yousefi, Kasra; Haddad, Zaid; Davicioni, Elai; Trabulsi, Edouard J.; Loeb, Stacy; Tewari, Ashutosh; Carroll, Peter R.; Weinmann, Sheila; Schaeffer, Edward M.; Klein, Eric A.; Karnes, R. Jeffrey; Feng, Felix Y.; Nguyen, Paul L. | JOURNAL OF CLINICAL ONCOLOGY | 2018 | 36 | 6  | 53 | 17,67 |

|                                                                                                                      |                                                                                                                                                                                                                                                                                     |                                                   |      |     |    |    |       |
|----------------------------------------------------------------------------------------------------------------------|-------------------------------------------------------------------------------------------------------------------------------------------------------------------------------------------------------------------------------------------------------------------------------------|---------------------------------------------------|------|-----|----|----|-------|
| MetaLnc9 Facilitates Lung Cancer Metastasis via a PGK1-Activated AKT/mTOR Pathway                                    | Yu, Tao; Zhao, Yingjun; Hu, Zhixiang; Li, Jing; Chu, Dandan; Zhang, Jiwei; Li, Zhe; Chen, Bing; Zhang, Xiao; Pan, Hongyu; Li, Shengli; Lin, Hechun; Liu, Lei; Yan, Mingxia; He, Xianghuo; Yao, Ming                                                                                 | CANCER RESEARCH                                   | 2017 | 77  | 21 | 53 | 13,25 |
| Integrated Classification of Prostate Cancer Reveals a Novel Luminal Subtype with Poor Outcome                       | You, Sungyong; Knudsen, Beatrice S.; Erho, Nicholas; Alshalalfa, Mohammed; Takhar, Mandeep; Ashab, Hussam Al-deen; Davicioni, Elai; Karnes, R. Jeffrey; Klein, Eric A.; Den, Robert B.; Ross, Ashley E.; Schaeffer, Edward M.; Garraway, Isla P.; Kim, Jayoung; Freeman, Michael R. | CANCER RESEARCH                                   | 2016 | 76  | 17 | 53 | 10,6  |
| Genomic Analysis of Tumor Microenvironment Immune Types across 14 Solid Cancer Types: Immunotherapeutic Implications | Chen, Yu-Pei; Zhang, Yu; Lv, Jia-Wei; Li, Ying-Qin; Wang, Ya-Qin; He, Qing-Mei; Yang, Xiao-Jing; Sun, Ying; Mao, Yan-Ping; Yun, Jing-Ping; Liu, Na; Ma, Jun                                                                                                                         | THERANOSTICS                                      | 2017 | 7   | 14 | 52 | 13    |
| Urine metabolic fingerprinting using LC-MS and GC-MS reveals metabolite changes in prostate cancer: A pilot study    | Struck-Lewicka, Wiktoria; Kordalewska, Marta; Bujak, Renata; Mpanga, Arlette Yumba; Markuszewski, Marcin; Jacyna, Julia; Matuszewski, Marcin; Kaliszan, Roman; Markuszewski, Michal J.                                                                                              | JOURNAL OF PHARMACEUTICAL AND BIOMEDICAL ANALYSIS | 2015 | 111 |    | 52 | 8,67  |
| Whole Transcriptome Sequencing Reveals Extensive Unspliced mRNA in Metastatic Castration-Resistant Prostate Cancer   | Sowalsky, Adam G.; Xia, Zheng; Wang, Liguu; Zhao, Hao; Chen, Shaoyong; Bubley, Glenn J.; Balk, Steven P.; Li, Wei                                                                                                                                                                   | MOLECULAR CANCER RESEARCH                         | 2015 | 13  | 1  | 52 | 8,67  |
| Cholesterol lowering: role in cancer prevention and treatment                                                        | Murai, Toshiyuki                                                                                                                                                                                                                                                                    | BIOLOGICAL CHEMISTRY                              | 2015 | 396 | 1  | 52 | 8,67  |
| Genomic Markers in Prostate Cancer Decision Making                                                                   | Cucchiara, Vito; Cooperberg, Matthew R.; Dall'Era, Marc; Lin, Daniel W.; Montorsi, Francesco; Schalken, Jack A.; Evans, Christopher P.                                                                                                                                              | EUROPEAN UROLOGY                                  | 2018 | 73  | 4  | 51 | 17    |
| Clinical applications of the CellSearch platform in cancer patients                                                  | Riethdorf, Sabine; O'Flaherty, Linda; Hille, Claudia; Pantel, Klaus                                                                                                                                                                                                                 | ADVANCED DRUG DELIVERY REVIEWS                    | 2018 | 125 |    | 51 | 17    |

|                                                                                                                                                                 |                                                                                                                                                                                                                                                                                                                                                                                                                                                                                                                                                            |                                                    |      |    |    |    |       |
|-----------------------------------------------------------------------------------------------------------------------------------------------------------------|------------------------------------------------------------------------------------------------------------------------------------------------------------------------------------------------------------------------------------------------------------------------------------------------------------------------------------------------------------------------------------------------------------------------------------------------------------------------------------------------------------------------------------------------------------|----------------------------------------------------|------|----|----|----|-------|
| LuCaP Prostate Cancer Patient-Derived Xenografts Reflect the Molecular Heterogeneity of Advanced Disease and Serve as Models for Evaluating Cancer Therapeutics | Nguyen, Holly M.; Vessella, Robert L.; Morrissey, Colm; Brown, Lisha G.; Coleman, Ilsa M.; Higano, Celestia S.; Mostaghel, Elahe A.; Zhang, Xiaotun; True, Lawrence D.; Lam, Hung-Ming; Roudier, Martine; Lange, Paul H.; Nelson, Peter S.; Corey, Eva                                                                                                                                                                                                                                                                                                     | PROSTATE                                           | 2017 | 77 | 6  | 51 | 12,75 |
| Yin Yang 1 is associated with cancer stem cell transcription factors (SOX2, OCT4, BMI1) and clinical implication                                                | Kaufhold, Samantha; Garban, Hermes; Bonavida, Benjamin                                                                                                                                                                                                                                                                                                                                                                                                                                                                                                     | JOURNAL OF EXPERIMENTAL & CLINICAL CANCER RESEARCH | 2016 | 35 |    | 51 | 10,2  |
| Large extracellular vesicles carry most of the tumour DNA circulating in prostate cancer patient plasma                                                         | Vagner, Tatyana; Spinelli, Cristiana; Minciocchi, Valentina R.; Balaj, Leonora; Zandian, Mandana; Conley, Andrew; Zijlstra, Andries; Freeman, Michael R.; Demichelis, Francesca; De, Subhajyoti; Posadas, Edwin M.; Tanaka, Hisashi; Di Vizio, Dolores                                                                                                                                                                                                                                                                                                     | JOURNAL OF EXTRACELLULAR VESICLES                  | 2018 | 7  | 1  | 50 | 16,67 |
| Opposing effects of cancer-type-specific SPOP mutants on BET protein degradation and sensitivity to BET inhibitors                                              | Janouskova, Hana; El Tekle, Geniver; Bellini, Elisa; Udeshi, Namrata D.; Rinaldi, Anna; Ulbricht, Anna; Bernasocchi, Tiziano; Civenni, Gianluca; Losa, Marco; Svinkina, Tanya; Bielski, Craig M.; Kryukov, Gregory V.; Cascione, Luciano; Napoli, Sara; Enchev, Radoslav I.; Mutch, David G.; Carney, Michael E.; Berchuck, Andrew; Winterhoff, Boris J. N.; Broaddus, Russell R.; Schraml, Peter; Moch, Holger; Bertoni, Francesco; Catapano, Carlo V.; Peter, Matthias; Carr, Steven A.; Garraway, Levi A.; Wild, Peter J.; Theurillat, Jean-Philippe P. | NATURE MEDICINE                                    | 2017 | 23 | 9  | 50 | 12,5  |
| Meta-analysis of miRNA expression profiles for prostate cancer recurrence following radical prostatectomy                                                       | Pashaei, Elnaz; Pashaei, Elham; Ahmady, Maryam; Ozen, Mustafa; Aydin, Nizamettin                                                                                                                                                                                                                                                                                                                                                                                                                                                                           | PLOS ONE                                           | 2017 | 12 | 6  | 50 | 12,5  |
| Roles of long noncoding RNAs in colorectal cancer metastasis                                                                                                    | Li, He; Ma, Si-Qing; Huang, Jin; Chen, Xiao-Ping; Zhou, Hong-Hao                                                                                                                                                                                                                                                                                                                                                                                                                                                                                           | ONCOTARGET                                         | 2017 | 8  | 24 | 50 | 12,5  |

|                                                                                                                                                           |                                                                                                                                                                                                                                                                                                                                                                                                                                                                                                                                                                                 |                            |      |    |    |    |       |
|-----------------------------------------------------------------------------------------------------------------------------------------------------------|---------------------------------------------------------------------------------------------------------------------------------------------------------------------------------------------------------------------------------------------------------------------------------------------------------------------------------------------------------------------------------------------------------------------------------------------------------------------------------------------------------------------------------------------------------------------------------|----------------------------|------|----|----|----|-------|
| Patient derived organoids to model rare prostate cancer phenotypes                                                                                        | Puca, Loredana; Bareja, Rohan; Prandi, Davide; Shaw, Reid; Benelli, Matteo; Karthaus, Wouter R.; Hess, Judy; Sigouros, Michael; Donoghue, Adam; Kossai, Myriam; Gao, Dong; Cyrta, Joanna; Sailer, Verena; Vosoughi, Aram; Pauli, Chantal; Churakova, Yelena; Cheung, Cynthia; Deonaraine, Lesa Dayal; McNary, Terra J.; Rosati, Rachele; Tagawa, Scott T.; Nanus, David M.; Mosquera, Juan Miguel; Sawyers, Charles L.; Chen, Yu; Inghirami, Giorgio; Rao, Rema A.; Grandori, Carla; Elemento, Olivier; Sboner, Andrea; Demichelis, Francesca; Rubin, Mark A.; Beitrah, Himisha | NATURE COMMUNICATIONS      | 2018 | 9  |    | 49 | 16,33 |
| Role of miRNAs in human cancer metastasis: Implications for therapeutic intervention                                                                      | Jafri, Mohammad Alam; Al-Qahtani, Mohammed Hussein; Shay, Jerry William                                                                                                                                                                                                                                                                                                                                                                                                                                                                                                         | SEMINARS IN CANCER BIOLOGY | 2017 | 44 |    | 49 | 12,25 |
| The Proteome of Primary Prostate Cancer                                                                                                                   | Iglesias-Gato, Diego; Wikstrom, Pernilla; Tyanova, Stefka; Lavallee, Charlotte; Thysell, Elin; Carlsson, Jessica; Hagglof, Christina; Cox, Juergen; Andren, Ove; Stattin, Par; Egevad, Lars; Widmark, Anders; Bjartell, Anders; Collins, Colin C.; Bergh, Anders; Geiger, Tamar; Mann, Matthias; Flores-Morales, Amilcar                                                                                                                                                                                                                                                        | EUROPEAN UROLOGY           | 2016 | 69 | 5  | 49 | 9,8   |
| Integration of lipidomics and transcriptomics unravels aberrant lipid metabolism and defines cholesteryl oleate as potential biomarker of prostate cancer | Li, Jia; Ren, Shancheng; Piao, Hai-long; Wang, Fubo; Yin, Peiyuan; Xu, Chuanliang; Lu, Xin; Ye, Guozhu; Shao, Yaping; Yan, Min; Zhao, Xinjie; Sun, Yinghao; Xu, Guowang                                                                                                                                                                                                                                                                                                                                                                                                         | SCIENTIFIC REPORTS         | 2016 | 6  |    | 49 | 9,8   |
| EpCAM-Independent Enrichment of Circulating Tumor Cells in Metastatic Breast Cancer                                                                       | Schneck, Helen; Gierke, Berthold; Uppenkamp, Frauke; Behrens, Bianca; Niederacher, Dieter; Stoecklein, Nikolas H.; Templin, Markus F.; Pawlak, Michael; Fehm, Tanja; Neubauer, Hans                                                                                                                                                                                                                                                                                                                                                                                             | PLOS ONE                   | 2015 | 10 | 12 | 49 | 8,17  |

|                                                                                                                                                                                                  |                                                                                                                                                                                                                              |                                              |      |    |    |    |      |
|--------------------------------------------------------------------------------------------------------------------------------------------------------------------------------------------------|------------------------------------------------------------------------------------------------------------------------------------------------------------------------------------------------------------------------------|----------------------------------------------|------|----|----|----|------|
| Urinary Volatile Organic Compounds for the Detection of Prostate Cancer                                                                                                                          | Khalid, Tanzeela; Aggio, Raphael; White, Paul; Costello, Ben De Lacy; Persad, Raj; Al-Kateb, Huda; Jones, Peter; Probert, Chris S.; Ratcliffe, Norman                                                                        | PLOS ONE                                     | 2015 | 10 | 11 | 49 | 8,17 |
| Mouse hospital and co-clinical trial project-from bench to bedside                                                                                                                               | Clohessy, John G.; Pandolfi, Pier Paolo                                                                                                                                                                                      | NATURE REVIEWS CLINICAL ONCOLOGY             | 2015 | 12 | 8  | 49 | 8,17 |
| IGFBP7, a novel tumor stroma marker, with growth-promoting effects in colon cancer through a paracrine tumor-stroma interaction                                                                  | Rupp, C.; Scherzer, M.; Rudisch, A.; Unger, C.; Haslinger, C.; Schweifer, N.; Artaker, M.; Nivarthi, H.; Moriggl, R.; Hengstschlaeger, M.; Kerjaschki, D.; Sommergruber, W.; Dolznig, H.; Garin-Chesa, P.                    | ONCOGENE                                     | 2015 | 34 | 7  | 49 | 8,17 |
| Identification of novel long non-coding RNAs in clear cell renal cell carcinoma                                                                                                                  | Blondeau, Jasmine J. C.; Deng, Mario; Syring, Isabella; Schroedter, Sarah; Schmidt, Doris; Perner, Sven; Mueller, Stefan C.; Ellinger, Joerg                                                                                 | CLINICAL EPIGENETICS                         | 2015 | 7  |    | 49 | 8,17 |
| Insights into Chemoresistance of Prostate Cancer                                                                                                                                                 | Zhang, Wei; Meng, Yan; Liu, Na; Wen, Xiao-Fei; Yang, Tao                                                                                                                                                                     | INTERNATIONAL JOURNAL OF BIOLOGICAL SCIENCES | 2015 | 11 | 10 | 49 | 8,17 |
| The crucial role of multiomic approach in cancer research and clinically relevant outcomes                                                                                                       | Lu, Miaolong; Zhan, Xianquan                                                                                                                                                                                                 | EPMA JOURNAL                                 | 2018 | 9  | 1  | 48 | 16   |
| Comprehensive Profiling of the Androgen Receptor in Liquid Biopsies from Castration-resistant Prostate Cancer Reveals Novel Intra-AR Structural Variation and Splice Variant Expression Patterns | De laere, Bram; van Dam, Pieter-Jan; Whittington, Tom; Mayrhofer, Markus; Diaz, Emanuela Henao; Van den Eynden, Gert; Vandebroek, Jean; Del-Favero, Jurgen; Van Laere, Steven; Dirix, Luc; Gronberg, Henrik; Lindberg, Johan | EUROPEAN UROLOGY                             | 2017 | 72 | 2  | 48 | 12   |
| Identification of androgen-responsive lncRNAs as diagnostic and prognostic markers for prostate cancer                                                                                           | Wan, Xuechao; Huang, Wenhua; Yang, Shu; Zhang, Yalong; Pu, Honglei; Fu, Fangqiu; Huang, Yan; Wu, Hai; Li, Tao; Li, Yao                                                                                                       | ONCOTARGET                                   | 2016 | 7  | 37 | 48 | 9,6  |
| Biomarker Discovery in Human Prostate Cancer: an Update in Metabolomics Studies                                                                                                                  | Lima, Ana Rita; Bastos, Maria de Lourdes; Carvalho, Marcia; de Pinho, Paula Guedes                                                                                                                                           | TRANSLATIONAL ONCOLOGY                       | 2016 | 9  | 4  | 48 | 9,6  |



|                                                                                                                                                                                |                                                                                                                                                                                                                                                           |                                             |      |    |    |    |       |
|--------------------------------------------------------------------------------------------------------------------------------------------------------------------------------|-----------------------------------------------------------------------------------------------------------------------------------------------------------------------------------------------------------------------------------------------------------|---------------------------------------------|------|----|----|----|-------|
| Targeting the fibroblast growth factor receptor family in cancer                                                                                                               | Hallinan, Niamh; Finn, Stephen; Cuffe, Sinead; Rafee, Shereen; O'Byrne, Kenneth; Gately, Kathy                                                                                                                                                            | CANCER TREATMENT REVIEWS                    | 2016 | 46 |    | 48 | 9,6   |
| Prostate cancer stem cells: the role of androgen and estrogen receptors                                                                                                        | Di Zazzo, Erika; Galasso, Giovanni; Giovannelli, Pia; Di Donato, Marzia; Di Santi, Annalisa; Cernera, Gustavo; Rossi, Valentina; Abbondanza, Ciro; Moncharmont, Bruno; Sinisi, Antonio Agostino; Castoria, Gabriella; Migliaccio, Antimo                  | ONCOTARGET                                  | 2016 | 7  | 1  | 48 | 9,6   |
| Supervised Multi-View Canonical Correlation Analysis (SMVCCA): Integrating Histologic and Proteomic Features for Predicting Recurrent Prostate Cancer                          | Lee, George; Singanamalli, Asha; Wang, Haibo; Feldman, Michael D.; Master, Stephen R.; Shih, Natalie N. C.; Spangler, Elaine; Rebbeck, Timothy; Tomaszewski, John E.; Madabhushi, Anant                                                                   | IEEE TRANSACTIONS ON MEDICAL IMAGING        | 2015 | 34 | 1  | 48 | 8     |
| Recent Advances in Prostate Cancer Treatment and Drug Discovery                                                                                                                | Nevedomskaya, Ekaterina; Baumgart, Simon J.; Haendler, Bernard                                                                                                                                                                                            | INTERNATIONAL JOURNAL OF MOLECULAR SCIENCES | 2018 | 19 | 5  | 47 | 15,67 |
| Personalized Proteome Profiles of Healthy and Tumor Human Colon Organoids Reveal Both Individual Diversity and Basic Features of Colorectal Cancer                             | Cristobal, Alba; van den Toom, Henk W. P.; van de Wetering, Marc; Clevers, Hans; Heck, Albert J. R.; Mohammed, Shabaz                                                                                                                                     | CELL REPORTS                                | 2017 | 18 | 1  | 47 | 11,75 |
| Inhibition of the hedgehog pathway in patients with basal-cell nevus syndrome: final results from the multicentre, randomised, double-blind, placebo-controlled, phase 2 trial | Tang, Jean Y.; Ally, Mina S.; Chanana, Anita M.; Mackay-Wiggan, Julian M.; Aszterbaum, Michelle; Lindgren, Joselyn A.; Ulerio, Grace; Rezaee, Melika R.; Gildengorin, Ginny; Marji, Jackleen; Clark, Charlotte; Bickers, David R.; Epstein, Ervin H., Jr. | LANCET ONCOLOGY                             | 2016 | 17 | 12 | 47 | 9,4   |

|                                                                                                                                      |                                                                                                                                                                                                                                                                                                                                                                                                                                                                                                          |                                                                                 |      |     |    |    |      |
|--------------------------------------------------------------------------------------------------------------------------------------|----------------------------------------------------------------------------------------------------------------------------------------------------------------------------------------------------------------------------------------------------------------------------------------------------------------------------------------------------------------------------------------------------------------------------------------------------------------------------------------------------------|---------------------------------------------------------------------------------|------|-----|----|----|------|
| FOXA1 overexpression mediates endocrine resistance by altering the ER transcriptome and IL-8 expression in ER-positive breast cancer | Fu, Xiaoyong; Jeselsohn, Rinath; Pereira, Resel; Hollingsworth, Emporia F.; Creighton, Chad J.; Li, Fugen; Shea, Martin; Nardone, Agostina; De Angelis, Carmine; Heiser, Laura M.; Anur, Pavana; Wang, Nicholas; Grasso, Catherine S.; Spellman, Paul T.; Griffith, Obi L.; Tsimelzon, Anna; Gutierrez, Carolina; Huang, Shixia; Edwards, Dean P.; Trivedi, Meghana V.; Rimawi, Mothaffar F.; Lopez-Terrada, Dolores; Hilsenbeck, Susan G.; Gray, Joe W.; Brown, Myles; Osborne, C. Kent; Schiff, Rachel | PROCEEDINGS OF THE NATIONAL ACADEMY OF SCIENCES OF THE UNITED STATES OF AMERICA | 2016 | 113 | 43 | 47 | 9,4  |
| A genetic basis for the variation in the vulnerability of cancer to DNA damage                                                       | Yard, Brian D.; Adams, Drew J.; Chie, Eui Kyu; Tamayo, Pablo; Battaglia, Jessica S.; Gopal, Priyanka; Rogacki, Kevin; Pearson, Bradley E.; Phillips, James; Raymond, Daniel P.; Pennell, Nathan A.; Almeida, Francisco; Cheah, Jaime H.; Clemons, Paul A.; Shamji, Alykhan; Peacock, Craig D.; Schreiber, Stuart L.; Hammerman, Peter S.; Abazeed, Mohamed E.                                                                                                                                            | NATURE COMMUNICATIONS                                                           | 2016 | 7   |    | 47 | 9,4  |
| Altered Glycosylation in Prostate Cancer                                                                                             | Drake, Richard R.; Jones, E. Ellen; Powers, Thomas W.; Nyalwidhe, Julius O.                                                                                                                                                                                                                                                                                                                                                                                                                              | GLYCOSYLATION AND CANCER                                                        | 2015 | 126 |    | 47 | 7,83 |

|                                                                                                                          |                                                                                                                                                                                                                                                                                                                                                                                                                                                                                                                                                                                                                                                                    |                                             |      |     |   |    |       |
|--------------------------------------------------------------------------------------------------------------------------|--------------------------------------------------------------------------------------------------------------------------------------------------------------------------------------------------------------------------------------------------------------------------------------------------------------------------------------------------------------------------------------------------------------------------------------------------------------------------------------------------------------------------------------------------------------------------------------------------------------------------------------------------------------------|---------------------------------------------|------|-----|---|----|-------|
| Analysis of the androgen receptor-regulated lncRNA landscape identifies a role for ARLNC1 in prostate cancer progression | Zhang, Yajia; Pitchiaya, Sethuramasundaram; Cieslik, Marcin; Niknafs, Yashar S.; Tien, Jean C. -Y.; Hosono, Yasuyuki; Iyer, Matthew K.; Yazdani, Sahr; Subramaniam, Shruthi; Shukla, Sudhanshu K.; Jiang, Xia; Wang, Lisha; Liu, Tzu-Ying; Uhl, Michael; Gawronski, Alexander R.; Qiao, Yuanyuan; Xiao, Lanbo; Dhanasekaran, Saravana M.; Juckette, Kristin M.; Kunju, Lakshmi P.; Cao, Xuhong; Patel, Utsav; Batish, Mona; Shukla, Girish C.; Paulsen, Michelle T.; Ljungman, Mats; Jiang, Hui; Mehra, Rohit; Backofen, Rolf; Sahinalp, Cenk S.; Freier, Susan M.; Watt, Andrew T.; Guo, Shuling; Wei, John T.; Feng, Felix Y.; Malik, Rohit; Chinnaiyan, Arul M. | NATURE GENETICS                             | 2018 | 50  | 6 | 46 | 15,33 |
| Metabolomic Biomarkers of Prostate Cancer: Prediction, Diagnosis, Progression, Prognosis, and Recurrence                 | Kelly, Rachel S.; Heiden, Matthew G. Vander; Giovannucci, Edward; Mucci, Lorelei A.                                                                                                                                                                                                                                                                                                                                                                                                                                                                                                                                                                                | CANCER EPIDEMIOLOGY BIOMARKERS & PREVENTION | 2016 | 25  | 6 | 46 | 9,2   |
| Urinary Exosomes: The Potential for Biomarker Utility, Intercellular Signaling and Therapeutics in Urological Malignancy | Franzen, Carrie A.; Blackwell, Robert H.; Foreman, Kimberly E.; Kuo, Paul C.; Flanigan, Robert C.; Gupta, Gopal N.                                                                                                                                                                                                                                                                                                                                                                                                                                                                                                                                                 | JOURNAL OF UROLOGY                          | 2016 | 195 | 5 | 46 | 9,2   |
| Gene regulatory mechanisms underpinning prostate cancer susceptibility                                                   | Whittington, Thomas; Gao, Ping; Song, Wei; Ross-Adams, Helen; Lamb, Alastair D.; Yang, Yuehong; Svezia, Ilaria; Klevebring, Daniel; Mills, Ian G.; Karlsson, Robert; Halim, Silvia; Dunning, Mark J.; Egevad, Lars; Warren, Anne Y.; Neal, David E.; Gronberg, Henrik; Lindberg, Johan; Wei, Gong-Hong; Wiklund, Fredrik                                                                                                                                                                                                                                                                                                                                           | NATURE GENETICS                             | 2016 | 48  | 4 | 46 | 9,2   |

|                                                                                                                                               |                                                                                                                                                                                                                                                                                        |                                                    |      |     |    |    |       |
|-----------------------------------------------------------------------------------------------------------------------------------------------|----------------------------------------------------------------------------------------------------------------------------------------------------------------------------------------------------------------------------------------------------------------------------------------|----------------------------------------------------|------|-----|----|----|-------|
| Techniques of using circulating tumor DNA as a liquid biopsy component in cancer management                                                   | Elazezy, Maha; Joosse, Simon A.                                                                                                                                                                                                                                                        | COMPUTATIONAL AND STRUCTURAL BIOTECHNOLOGY JOURNAL | 2018 | 16  |    | 45 | 15    |
| Impact of novel miR-145-3p regulatory networks on survival in patients with castration-resistant prostate cancer                              | Goto, Yusuke; Kurozumi, Akira; Arai, Takayuki; Nohata, Nijiro; Kojima, Satoko; Okato, Atsushi; Kato, Mayuko; Yamazaki, Kazuto; Ishida, Yasuo; Naya, Yukio; Ichikawa, Tomohiko; Seki, Naohiko                                                                                           | BRITISH JOURNAL OF CANCER                          | 2017 | 117 | 3  | 45 | 11,25 |
| Cooperative Dynamics of AR and ER Activity in Breast Cancer                                                                                   | D'Amato, Nicholas C.; Gordon, Michael A.; Babbs, Beatrice; Spoelstra, Nicole S.; Butterfield, Kiel T. Carson; Torkko, Kathleen C.; Phan, Vernon T.; Barton, Valerie N.; Rogers, Thomas J.; Sartorius, Carol A.; Elias, Anthony; Gertz, Jason; Jacobsen, Britta M.; Richer, Jennifer K. | MOLECULAR CANCER RESEARCH                          | 2016 | 14  | 11 | 45 | 9     |
| Targeting bet bromodomain proteins in solid tumors                                                                                            | Sahai, Vaibhav; Redig, Amanda J.; Collier, Katharine A.; Eckerdt, Frank D.; Munshi, Hidayatullah G.                                                                                                                                                                                    | ONCOTARGET                                         | 2016 | 7   | 33 | 45 | 9     |
| Genomic and Epigenomic Alterations in Cancer                                                                                                  | Chakravarthi, Balabhadrapatruni V. S. K.; Nepal, Saroj; Varambally, Sooryanarayana                                                                                                                                                                                                     | AMERICAN JOURNAL OF PATHOLOGY                      | 2016 | 186 | 7  | 45 | 9     |
| Integrin beta 4 and vinculin contained in exosomes are potential markers for progression of prostate cancer associated with taxane-resistance | Kawakami, Kyojiro; Fujita, Yasunori; Kato, Taku; Mizutani, Kosuke; Kameyama, Koji; Tsumoto, Hiroki; Miura, Yuri; Deguchi, Takashi; Ito, Masafumi                                                                                                                                       | INTERNATIONAL JOURNAL OF ONCOLOGY                  | 2015 | 47  | 1  | 45 | 7,5   |
| Selenium and Chronic Diseases: A Nutritional Genomics Perspective                                                                             | Meplan, Catherine                                                                                                                                                                                                                                                                      | NUTRIENTS                                          | 2015 | 7   | 5  | 45 | 7,5   |

|                                                                                                        |                                                                                                                                                                                                                                                                                  |                           |      |     |    |    |      |
|--------------------------------------------------------------------------------------------------------|----------------------------------------------------------------------------------------------------------------------------------------------------------------------------------------------------------------------------------------------------------------------------------|---------------------------|------|-----|----|----|------|
| Tumour heterogeneity poses a significant challenge to cancer biomarker research                        | Cyll, Karolina; Ersvaer, Elin; Vlatkovic, Ljiljana; Pradhan, Manohar; Kildal, Wanja; Kjaer, Marte Avranden; Kleppe, Andreas; Hveem, Tarjei S.; Carlsen, Birgitte; Gill, Silje; Loffeler, Sven; Haug, Erik Skaaheim; Waehre, Hakon; Sooriakumaran, Prasanna; Danielsen, Havard E. | BRITISH JOURNAL OF CANCER | 2017 | 117 | 3  | 44 | 11   |
| DNMT1 Inhibition Reprograms Pancreatic Cancer Stem Cells via Upregulation of the miR-17-92 Cluster     | Zagorac, Sladjana; Alcalá, Sonia; Fernandez Bayon, Gustavo; Kheir, Tony Bou; Schoenhals, Matthieu; Gonzalez-Neira, Anna; Fernandez Fraga, Mario; Aicher, Alexandra; Heeschen, Christopher; Sainz, Bruno, Jr.                                                                     | CANCER RESEARCH           | 2016 | 76  | 15 | 44 | 8,8  |
| Treatment of the Primary Tumor in Metastatic Prostate Cancer: Current Concepts and Future Perspectives | Bayne, Christopher E.; Williams, Stephen B.; Cooperberg, Matthew R.; Gleave, Martin E.; Graefen, Markus; Montorsi, Francesco; Novara, Giacomo; Smaldone, Marc C.; Sooriakumaran, Prasanna; Wiklund, Peter N.; Chapin, Brian F.                                                   | EUROPEAN UROLOGY          | 2016 | 69  | 5  | 44 | 8,8  |
| DNA damage response and prostate cancer: defects, regulation and therapeutic implications              | Karanika, S.; Karantanos, T.; Li, L.; Corn, P. G.; Thompson, T. C.                                                                                                                                                                                                               | ONCOGENE                  | 2015 | 34  | 22 | 44 | 7,33 |
| Polycomb-mediated silencing in neuroendocrine prostate cancer                                          | Clermont, Pier-Luc; Lin, Dong; Crea, Francesco; Wu, Rebecca; Xue, Hui; Wang, Yuwei; Thu, Kelsie L.; Lam, Wan L.; Collins, Colin C.; Wang, Yuzhuo; Helgason, Cheryl D.                                                                                                            | CLINICAL EPIGENETICS      | 2015 | 7   |    | 44 | 7,33 |

|                                                                                                                                                              |                                                                                                                                                                                                                                                                                                                                                                         |                                                  |      |    |    |    |      |
|--------------------------------------------------------------------------------------------------------------------------------------------------------------|-------------------------------------------------------------------------------------------------------------------------------------------------------------------------------------------------------------------------------------------------------------------------------------------------------------------------------------------------------------------------|--------------------------------------------------|------|----|----|----|------|
| Second-Generation HSP90 Inhibitor Onalespib Blocks mRNA Splicing of Androgen Receptor Variant 7 in Prostate Cancer Cells                                     | Ferraldeschi, Roberta; Welti, Jonathan; Powers, Marissa V.; Yuan, Wei; Smyth, Tomoko; Seed, George; Riisnaes, Ruth; Hedayat, Somaieh; Wang, Hannah; Crespo, Mateus; Rodrigues, Daniel Nava; Figueiredo, Ines; Miranda, Susana; Carreira, Suzanne; Lyons, John F.; Sharp, Swee; Plymate, Stephen R.; Attard, Gerhardt; Wallis, Nicola; Workman, Paul; de Bono, Johann S. | CANCER RESEARCH                                  | 2016 | 76 | 9  | 43 | 8,6  |
| Integrated gene and miRNA expression analysis of prostate cancer associated fibroblasts supports a prominent role for interleukin-6 in fibroblast activation | Doldi, Valentina; Callari, Maurizio; Giannoni, Elisa; D'Aiuto, Francesca; Maffezzini, Massimo; Valdagni, Riccardo; Chiarugi, Paola; Gandellini, Paolo; Zaffaroni, Nadia                                                                                                                                                                                                 | ONCOTARGET                                       | 2015 | 6  | 31 | 43 | 7,17 |
| Cooperative integration between HEDGEHOG-GLI signalling and other oncogenic pathways: implications for cancer therapy                                        | Pandolfi, Silvia; Stecca, Barbara                                                                                                                                                                                                                                                                                                                                       | EXPERT REVIEWS IN MOLECULAR MEDICINE             | 2015 | 17 |    | 43 | 7,17 |
| Diverse genetic-driven immune landscapes dictate tumor progression through distinct mechanisms                                                               | Bezzi, Marco; Seitzer, Nina; Ishikawa, Tomoki; Reschke, Markus; Chen, Ming; Wang, Guocan; Mitchell, Caitlin; Ng, Christopher; Katon, Jesse; Lunardi, Andrea; Signoretti, Sabina; Clohessy, John G.; Zhang, Jiangwen; Pandolfi, Pier Paolo                                                                                                                               | NATURE MEDICINE                                  | 2018 | 24 | 2  | 42 | 14   |
| Using circulating cell-free DNA to monitor personalized cancer therapy                                                                                       | Oellerich, Michael; Schuetz, Ekkehard; Beck, Julia; Kanzow, Philipp; Plowman, Piers N.; Weiss, Glen J.; Walson, Philip D.                                                                                                                                                                                                                                               | CRITICAL REVIEWS IN CLINICAL LABORATORY SCIENCES | 2017 | 54 | 3  | 42 | 10,5 |
| Perspectives of long non-coding RNAs in cancer                                                                                                               | Rao, Arunagiri Kuha Deva Magendhra; Rajkumar, Thangarajan; Mani, Samson                                                                                                                                                                                                                                                                                                 | MOLECULAR BIOLOGY REPORTS                        | 2017 | 44 | 2  | 42 | 10,5 |

|                                                                                                                                                                           |                                                                                                                                                                                                                                                                                                                                                                                                             |                                            |      |     |    |    |       |
|---------------------------------------------------------------------------------------------------------------------------------------------------------------------------|-------------------------------------------------------------------------------------------------------------------------------------------------------------------------------------------------------------------------------------------------------------------------------------------------------------------------------------------------------------------------------------------------------------|--------------------------------------------|------|-----|----|----|-------|
| Metabolomic Profiling of Extracellular Vesicles and Alternative Normalization Methods Reveal Enriched Metabolites and Strategies to Study Prostate Cancer-Related Changes | Puhka, Maija; Takatalo, Maarit; Nordberg, Maria-Elisa; Valkonen, Sami; Nandania, Jatin; Aatonen, Maria; Yliperttula, Marjo; Laitinen, Saara; Velagapudi, Vidya; Mirtti, Tuomas; Kallioniemi, Olli; Rannikko, Antti; Siljander, Pia R-M; Af Hallstrom, Taija Maria                                                                                                                                           | THERANOSTICS                               | 2017 | 7   | 16 | 42 | 10,5  |
| Analytic validation of a clinical-grade PTEN immunohistochemistry assay in prostate cancer by comparison with PTEN FISH                                                   | Lotan, Tamara L.; Wei, Wei; Ludkovski, Olga; Morais, Carlos L.; Guedes, Liana B.; Jamaspishvili, Tamara; Lopez, Karen; Hawley, Sarah T.; Feng, Ziding; Fazli, Ladan; Hurtado-Coll, Antonio; McKenney, Jesse K.; Simko, Jeffrey; Carroll, Peter R.; Gleave, Martin; Lin, Daniel W.; Nelson, Peter S.; Thompson, Ian M.; True, Lawrence D.; Brooks, James D.; Lance, Raymond; Troyer, Dean; Squire, Jeremy A. | MODERN PATHOLOGY                           | 2016 | 29  | 8  | 42 | 8,4   |
| Advances in Therapeutic Cancer Vaccines                                                                                                                                   | Wong, Karrie K.; Li, WeiWei Aileen; Mooney, David J.; Dranoff, Glenn                                                                                                                                                                                                                                                                                                                                        | TUMOR IMMUNOLOGY                           | 2016 | 130 |    | 42 | 8,4   |
| Biodegradable nano-films for capture and non-invasive release of circulating tumor cells                                                                                  | Li, Wei; Reategui, Eduardo; Park, Myoung-Hwan; Castleberry, Steven; Deng, Jason Z.; Hsu, Bryan; Mayner, Sarah; Jensen, Anne E.; Sequist, Lecia V.; Maheswaran, Shyamala; Haber, Daniel A.; Toner, Mehmet; Stott, Shannon L.; Hammond, Paula T.                                                                                                                                                              | BIOMATERIALS                               | 2015 | 65  |    | 42 | 7     |
| Regulation of the glucocorticoid receptor via a BET-dependent enhancer drives antiandrogen resistance in prostate cancer                                                  | Shah, Neel; Wang, Ping; Wongvipat, John; Karthaus, Wouter R.; Abida, Wassim; Armenia, Joshua; Rockowitz, Shira; Drier, Yotam; Bernstein, Bradley E.; Long, Henry W.; Freedman, Matthew L.; Arora, Vivek K.; Zheng, Deyou; Sawyers, Charles L.                                                                                                                                                               | ELIFE                                      | 2017 | 6   |    | 41 | 10,25 |
| miRNAs as novel biomarkers in the management of prostate cancer                                                                                                           | Filella, Xavier; Foj, Laura                                                                                                                                                                                                                                                                                                                                                                                 | CLINICAL CHEMISTRY AND LABORATORY MEDICINE | 2017 | 55  | 5  | 41 | 10,25 |

|                                                                                                                                                                  |                                                                                                                                                                                                                                                                                                                                                                |                                                                                 |      |     |    |    |       |
|------------------------------------------------------------------------------------------------------------------------------------------------------------------|----------------------------------------------------------------------------------------------------------------------------------------------------------------------------------------------------------------------------------------------------------------------------------------------------------------------------------------------------------------|---------------------------------------------------------------------------------|------|-----|----|----|-------|
| miR-375 induces docetaxel resistance in prostate cancer by targeting SEC23A and YAP1                                                                             | Wang, Yuan; Lieberman, Rachel; Pan, Jing; Zhang, Qi; Du, Meijun; Zhang, Peng; Nevalainen, Marja; Kohli, Manish; Shenoy, Niraj K.; Meng, Hui; You, Ming; Wang, Liang                                                                                                                                                                                            | MOLECULAR CANCER                                                                | 2016 | 15  |    | 41 | 8,2   |
| Resistance to docetaxel in prostate cancer is associated with androgen receptor activation and loss of KDM5D expression                                          | Komura, Kazumasa; Jeong, Seong Ho; Hinohara, Kunihiko; Qu, Fangfang; Wang, Xiaodong; Hiraki, Masayuki; Azuma, Haruhito; Lee, Gwo-Shu Mary; Kantoff, Philip W.; Sweeney, Christopher J.                                                                                                                                                                         | PROCEEDINGS OF THE NATIONAL ACADEMY OF SCIENCES OF THE UNITED STATES OF AMERICA | 2016 | 113 | 22 | 41 | 8,2   |
| Challenges for CTC-based liquid biopsies: low CTC frequency and diagnostic leukapheresis as a potential solution                                                 | Stoecklein, Nikolas H.; Fischer, Johannes C.; Niederacher, Dieter; Terstappen, Leon W. M. M.                                                                                                                                                                                                                                                                   | EXPERT REVIEW OF MOLECULAR DIAGNOSTICS                                          | 2016 | 16  | 2  | 41 | 8,2   |
| A Somatic Acquired Enhancer of the Androgen Receptor Is a Noncoding Driver in Advanced Prostate Cancer                                                           | Takeda, David Y.; Spisak, Sandor; Seo, Ji-Heui; Bell, Connor; O'Connor, Edward; Korthauer, Keegan; Ribli, Dezso; Csabai, Istvan; Solymosi, Norbert; Szallasi, Zoltan; Stillman, David R.; Cejas, Paloma; Qiu, Xintao; Long, Henry W.; Tisza, Viktoria; Nuzzo, Pier Vitale; Rohanizadegan, Mersedeh; Pomerantz, Mark M.; Hahn, William C.; Freedman, Matthew L. | CELL                                                                            | 2018 | 174 | 2  | 40 | 13,33 |
| The Metabolic Phenotype of Prostate Cancer                                                                                                                       | Eidelman, Eric; Twum-Ampofo, Jeffrey; Ansari, Jamal; Siddiqui, Mohammad Minhaj                                                                                                                                                                                                                                                                                 | FRONTIERS IN ONCOLOGY                                                           | 2017 | 7   |    | 40 | 10    |
| Subgroups of Castration-resistant Prostate Cancer Bone Metastases Defined Through an Inverse Relationship Between Androgen Receptor Activity and Immune Response | Ylitalo, Erik Bovinder; Thysell, Elin; Jernberg, Emma; Lundholm, Marie; Crnalic, Sead; Egevad, Lars; Stattin, Par; Widmark, Anders; Bergh, Anders; Wikstrom, Pernilla                                                                                                                                                                                          | EUROPEAN UROLOGY                                                                | 2017 | 71  | 5  | 40 | 10    |



|                                                                                                                                                                                                                                          |                                                                                                                                                                                                                                                                                                                                            |                              |      |     |    |    |      |
|------------------------------------------------------------------------------------------------------------------------------------------------------------------------------------------------------------------------------------------|--------------------------------------------------------------------------------------------------------------------------------------------------------------------------------------------------------------------------------------------------------------------------------------------------------------------------------------------|------------------------------|------|-----|----|----|------|
| Integrative analyses of transcriptome sequencing identify novel functional lncRNAs in esophageal squamous cell carcinoma                                                                                                                 | Li, C-Q; Huang, G-W; Wu, Z-Y; Xu, Y-J; Li, X-C; Xue, Y-J; Zhu, Y.; Zhao, J-M; Li, M.; Zhang, J.; Wu, J-Y; Lei, F.; Wang, Q-Y; Li, S.; Zheng, C-P; Ai, B.; Tang, Z-D; Feng, C-C; Liao, L-D; Wang, S-H; Shen, J-H; Liu, Y-J; Bai, X-F; He, J-Z; Cao, H-H; Wu, B-L; Wang, M-R; Lin, D-C; Koeffler, H. P.; Wang, L-D; Li, X.; Li, E-M; Xu, L-Y | ONCOGENESIS                  | 2017 | 6   |    | 40 | 10   |
| Lysine acetylation and cancer: A proteomics perspective                                                                                                                                                                                  | Gil, Jeovanis; Ramirez-Torres, Alberto; Encarnacion-Guevara, Sergio                                                                                                                                                                                                                                                                        | JOURNAL OF PROTEOMICS        | 2017 | 150 |    | 40 | 10   |
| Monitoring cancer prognosis, diagnosis and treatment efficacy using metabolomics and lipidomics                                                                                                                                          | Armitage, Emily G.; Southam, Andrew D.                                                                                                                                                                                                                                                                                                     | METABOLOMICS                 | 2016 | 12  | 9  | 40 | 8    |
| Expression Profile Analysis of microRNAs in Prostate Cancer by Next-Generation Sequencing                                                                                                                                                | Song, Chunjiao; Chen, Huan; Wang, Tingzhang; Zhang, Weiguang; Ru, Guomei; Lang, Juan                                                                                                                                                                                                                                                       | PROSTATE                     | 2015 | 75  | 5  | 40 | 6,67 |
| Genomic Classifier Augments the Role of Pathological Features in Identifying Optimal Candidates for Adjuvant Radiation Therapy in Patients With Prostate Cancer: Development and Internal Validation of a Multivariable Prognostic Model | Dalela, Deepansh; Santiago-Jimenez, Maria; Yousefi, Kasra; Karnes, R. Jeffrey; Ross, Ashley E.; Den, Robert B.; Freedland, Stephen J.; Schaeffer, Edward M.; Dicker, Adam P.; Menon, Mani; Briganti, Alberto; Davicioni, Elai; Abdollah, Firas                                                                                             | JOURNAL OF CLINICAL ONCOLOGY | 2017 | 35  | 18 | 39 | 9,75 |
| Proteomic analysis of urinary extracellular vesicles from high Gleason score prostate cancer                                                                                                                                             | Fujita, Kazutoshi; Kume, Hideaki; Matsuzaki, Kyosuke; Kawashima, Atsunari; Ujike, Takeshi; Nagahara, Akira; Uemura, Motohide; Miyagawa, Yasushi; Tomonaga, Takeshi; Nonomura, Norio                                                                                                                                                        | SCIENTIFIC REPORTS           | 2017 | 7   |    | 39 | 9,75 |
| The biology of DHX9 and its potential as a therapeutic target                                                                                                                                                                            | Lee, Teresa; Pelletier, Jerry                                                                                                                                                                                                                                                                                                              | ONCOTARGET                   | 2016 | 7   | 27 | 39 | 7,8  |
| Novel diagnostic and prognostic classifiers for prostate cancer identified by genome-wide microRNA profiling                                                                                                                             | Kristensen, Helle; Thomsen, Anni R.; Haldrup, Christa; Dyrskjot, Lars; Hoyer, Soren; Borre, Michael; Mouritzen, Peter; Orntoft, Torben F.; Sorensen, Karina Dalsgaard                                                                                                                                                                      | ONCOTARGET                   | 2016 | 7   | 21 | 39 | 7,8  |

|                                                                                                                |                                                                                                                                                                                                                                                           |                                                                      |      |     |    |    |     |
|----------------------------------------------------------------------------------------------------------------|-----------------------------------------------------------------------------------------------------------------------------------------------------------------------------------------------------------------------------------------------------------|----------------------------------------------------------------------|------|-----|----|----|-----|
| Exosomes confer pro-survival signals to alter the phenotype of prostate cells in their surrounding environment | Hosseini-Beheshti, Elham; Choi, Wendy; Weiswald, Louis-Bastien; Kharmate, Geetanjali; Ghaffari, Mazyar; Roshan-Moniri, Mani; Hassona, Mohamed D.; Chan, Leslie; Chin, Mei Yieng; Tai, Isabella T.; Rennie, Paul S.; Fazli, Ladan; Guns, Emma S. Tomlinson | ONCOTARGET                                                           | 2016 | 7   | 12 | 39 | 7,8 |
| JARID1D Is a Suppressor and Prognostic Marker of Prostate Cancer Invasion and Metastasis                       | Li, Na; Dhar, Shilpa S.; Chen, Tsai-Yu; Kan, Pu-Yeh; Wei, Yongkun; Kim, Jae-Hwan; Chan, Chia-Hsin; Lin, Hui-Kuan; Hung, Mien-Chie; Lee, Min Gyu                                                                                                           | CANCER RESEARCH                                                      | 2016 | 76  | 4  | 39 | 7,8 |
| Genome-wide analysis of microRNA and mRNA expression signatures in cancer                                      | Li, Ming-hui; Fu, Sheng-bo; Xiao, Hua-sheng                                                                                                                                                                                                               | ACTA PHARMACOLOGICA SINICA                                           | 2015 | 36  | 10 | 39 | 6,5 |
| Biomarkers in prostate cancer - Current clinical utility and future perspectives                               | Kretschmer, Alexander; Tilki, Derya                                                                                                                                                                                                                       | CRITICAL REVIEWS IN ONCOLOGY HEMATOLOGY                              | 2017 | 120 |    | 38 | 9,5 |
| Targeting genomic rearrangements in tumor cells through Cas9-mediated insertion of a suicide gene              | Chen, Zhang-Hui; Yu, Yan P.; Zuo, Ze-Hua; Nelson, Joel B.; Michalopoulos, George K.; Monga, Satdatshan; Liu, Silvia; Tseng, George; Luo, Jian-Hua                                                                                                         | NATURE BIOTECHNOLOGY                                                 | 2017 | 35  | 6  | 38 | 9,5 |
| Metformin alters DNA methylation genome-wide via the H19/SAHH axis                                             | Zhong, T.; Men, Y.; Lu, L.; Geng, T.; Zhou, J.; Mitsunashi, A.; Shozu, M.; Maihle, N. J.; Carmichael, G. G.; Taylor, H. S.; Huang, Y.                                                                                                                     | ONCOGENE                                                             | 2017 | 36  | 17 | 38 | 9,5 |
| Prostate cancer biomarkers: Are we hitting the mark?                                                           | McGrath, Shannon; Christidis, Daniel; Perera, Marlon; Hong, Sung Kyu; Manning, Todd; Vela, Ian; Lawrentschuk, Nathan                                                                                                                                      | PROSTATE INTERNATIONAL                                               | 2016 | 4   | 4  | 38 | 7,6 |
| A long noncoding RNA signature for ulcerative colitis identifies IFNG-AS1 as an enhancer of inflammation       | Padua, David; Mahurkar-Joshi, Swapna; Law, Ivy Ka Man; Polyarchou, Christos; Vu, John P.; Pisegna, Joseph R.; Shih, David; Iliopoulos, Dimitrios; Pothoulakis, Charalabos                                                                                 | AMERICAN JOURNAL OF PHYSIOLOGY-GASTROINTESTINAL AND LIVER PHYSIOLOGY | 2016 | 311 | 3  | 38 | 7,6 |

|                                                                                                                                                    |                                                                                                                                                                                                                                                                                                                                                          |                               |      |     |    |    |      |
|----------------------------------------------------------------------------------------------------------------------------------------------------|----------------------------------------------------------------------------------------------------------------------------------------------------------------------------------------------------------------------------------------------------------------------------------------------------------------------------------------------------------|-------------------------------|------|-----|----|----|------|
| Association of multiparametric MRI quantitative imaging features with prostate cancer gene expression in MRI-targeted prostate biopsies            | Stoyanova, Radka; Pollack, Alan; Takhar, Mandeep; Lynne, Charles; Parra, Nestor; Lam, Lucia L. C.; Alshalalfa, Mohammed; Buerki, Christine; Castillo, Rosa; Jorda, Merce; Ashab, Hussam Al-deen; Kryvenko, Oleksandr N.; Punnen, Sanoj; Parekh, Dipen J.; Abramowitz, Matthew C.; Gillies, Robert J.; Davicioni, Elai; Erho, Nicholas; Ishkanian, Adrian | ONCOTARGET                    | 2016 | 7   | 33 | 38 | 7,6  |
| Prostate cancer radiomics and the promise of radiogenomics                                                                                         | Stoyanova, Radka; Takhar, Mandeep; Tschudi, Yohann; Ford, John C.; Solorzano, Gabriel; Erho, Nicholas; Balagurunathan, Yoganand; Punnen, Sanoj; Davicioni, Elai; Gillies, Robert J.; Pollack, Alan                                                                                                                                                       | TRANSLATIONAL CANCER RESEARCH | 2016 | 5   | 4  | 38 | 7,6  |
| Metabolic Reprogramming and Dependencies Associated with Epithelial Cancer Stem Cells Independent of the Epithelial-Mesenchymal Transition Program | Aguilar, Esther; Marin de Mas, Igor; Zodda, Erika; Marin, Silvia; Morrish, Fionnuala; Selivanov, Vitaly; Meca-Cortes, Oscar; Delowar, Hossain; Pons, Monica; Izquierdo, Ines; Celia-Terrassa, Toni; de Atauri, Pedro; Centelles, Josep J.; Hockenbery, David; Thomson, Timothy M.; Cascante, Marta                                                       | STEM CELLS                    | 2016 | 34  | 5  | 38 | 7,6  |
| Transcriptional profiling analysis and functional prediction of long noncoding RNAs in cancer                                                      | Yuan, Jiao; Yue, Haiyan; Zhang, Meiyang; Luo, Jianjun; Liu, Lihui; Wu, Wei; Xiao, Tengfei; Chen, Xiaowei; Chen, Xiaomin; Zhang, Dongdong; Xing, Rui; Tong, Xin; Wu, Nan; Zhao, Jian; Lu, Youyong; Guo, Mingzhou; Chen, Runsheng                                                                                                                          | ONCOTARGET                    | 2016 | 7   | 7  | 38 | 7,6  |
| Metabolic markers in blood can separate prostate cancer from benign prostatic hyperplasia                                                          | Giskeodegard, Guro F.; Hansen, Ailin Falkmo; Bertilsson, Helena; Gonzalez, Susana Villa; Kristiansen, Kare Andre; Bruheim, Per; Mjos, Svein A.; Angelsen, Anders; Bathen, Tone Frost; Tessem, May-Britt                                                                                                                                                  | BRITISH JOURNAL OF CANCER     | 2015 | 113 | 12 | 38 | 6,33 |

|                                                                                                                                                                         |                                                                                                                                                                                                                                                                                                                                          |                                       |      |     |    |    |       |
|-------------------------------------------------------------------------------------------------------------------------------------------------------------------------|------------------------------------------------------------------------------------------------------------------------------------------------------------------------------------------------------------------------------------------------------------------------------------------------------------------------------------------|---------------------------------------|------|-----|----|----|-------|
| TLR9 signaling through NF-kappa B/RELA and STAT3 promotes tumor-propagating potential of prostate cancer cells                                                          | Moreira, Dayson; Zhang, Qifang; Hossain, Dewan Md S.; Nechaev, Sergey; Li, Haiqing; Kowolik, Claudia M.; D'Apuzzo, Massimo; Forman, Stephen; Jones, Jeremy; Pal, Sumanta K.; Kortylewski, Marcin                                                                                                                                         | ONCOTARGET                            | 2015 | 6   | 19 | 38 | 6,33  |
| Flux balance analysis predicts essential genes in clear cell renal cell carcinoma metabolism                                                                            | Gatto, Francesco; Miess, Heike; Schulze, Almut; Nielsen, Jens                                                                                                                                                                                                                                                                            | SCIENTIFIC REPORTS                    | 2015 | 5   |    | 38 | 6,33  |
| Background, Current Role, and Potential Applications of Radiogenomics                                                                                                   | Pinker, Katja; Shitano, Fuki; Sala, Evis; Do, Richard K.; Young, Robert J.; Wibmer, Andreas G.; Hricak, Hedvig; Sutton, Elizabeth J.; Morris, Elizabeth A.                                                                                                                                                                               | JOURNAL OF MAGNETIC RESONANCE IMAGING | 2018 | 47  | 3  | 37 | 12,33 |
| Clinical variability and molecular heterogeneity in prostate cancer                                                                                                     | Shoag, Jonathan; Barbieri, Christopher E.                                                                                                                                                                                                                                                                                                | ASIAN JOURNAL OF ANDROLOGY            | 2016 | 18  | 4  | 37 | 7,4   |
| Molecular evidence that invasive adenocarcinoma can mimic prostatic intraepithelial neoplasia (PIN) and intraductal carcinoma through retrograde glandular colonization | Haffner, Michael C.; Weier, Christopher; Xu, Meng Meng; Vaghasia, Ajay; Guerel, Bora; Guemueskaya, Berrak; Esopi, David M.; Fedor, Helen; Tan, Hsueh-Li; Kulac, Ibrahim; Hicks, Jessica; Isaacs, William B.; Lotan, Tamara L.; Nelson, William G.; Yegnasubramanian, Srinivasan; De Marzo, Angelo M.                                     | JOURNAL OF PATHOLOGY                  | 2016 | 238 | 1  | 37 | 7,4   |
| Expression of androgen receptor splice variants in clinical breast cancers                                                                                              | Hickey, Theresa E.; Irvine, Connie M.; Dvinge, Heidi; Tarulli, Gerard A.; Hanson, Adrienne R.; Ryan, Natalie K.; Pickering, Marie A.; Birrell, Stephen N.; Hu, Dong Gui; Mackenzie, Peter I.; Russell, Roslin; Caldas, Carlos; Raj, Ganesh V.; Dehm, Scott M.; Plymate, Stephen R.; Bradley, Robert K.; Tilley, Wayne D.; Selth, Luke A. | ONCOTARGET                            | 2015 | 6   | 42 | 37 | 6,17  |

|                                                                                                                             |                                                                                                                                                                                                                                                                                                                                                                                                                                                                                             |                                  |      |     |     |    |      |
|-----------------------------------------------------------------------------------------------------------------------------|---------------------------------------------------------------------------------------------------------------------------------------------------------------------------------------------------------------------------------------------------------------------------------------------------------------------------------------------------------------------------------------------------------------------------------------------------------------------------------------------|----------------------------------|------|-----|-----|----|------|
| The GALNT9, BNC1 and CCDC8 genes are frequently epigenetically dysregulated in breast tumours that metastasise to the brain | Pangeni, Rajendra P.; Channathodiyil, Prasanna; Huen, David S.; Eagles, Lawrence W.; Johal, Balraj K.; Pasha, Dawar; Hadjistephanou, Natasa; Nevell, Oliver; Davies, Claire L.; Adewumi, Ayobami I.; Khanom, Hamida; Samra, Ikroop S.; Buzatto, Vanessa C.; Chandrasekaran, Preethi; Shinawi, Thoraia; Dawson, Timothy P.; Ashton, Katherine M.; Davis, Charles; Brodbelt, Andrew R.; Jenkinson, Michael D.; Bieche, Ivan; Latif, Farida; Darling, John L.; Warr, Tracy J.; Morris, Mark R. | CLINICAL EPIGENETICS             | 2015 | 7   |     | 37 | 6,17 |
| Unraveling the molecular repertoire of tears as a source of biomarkers: Beyond ocular diseases                              | Pieragostino, Damiana; D'Alessandro, Michele; di Ioia, Maria; Di Ilio, Carmine; Sacchetta, Paolo; Del Boccio, Piero                                                                                                                                                                                                                                                                                                                                                                         | PROTEOMICS CLINICAL APPLICATIONS | 2015 | 9   | 1-2 | 37 | 6,17 |
| Clinical and molecular features of treatment-related neuroendocrine prostate cancer                                         | Akamatsu, Shusuke; Inoue, Takahiro; Ogawa, Osamu; Gleave, Martin E.                                                                                                                                                                                                                                                                                                                                                                                                                         | INTERNATIONAL JOURNAL OF UROLOGY | 2018 | 25  | 4   | 36 | 12   |
| Cell-Cycle-Targeting MicroRNAs as Therapeutic Tools against Refractory Cancers                                              | Hydbring, Per; Wang, Yanan; Fassl, Anne; Li, Xiaoting; Matia, Veronica; Otto, Tobias; Choi, Yoon Jong; Sweeney, Katharine E.; Suski, Jan M.; Yin, Hao; Bogorad, Roman L.; Goel, Shom; Yuzugullu, Haluk; Kauffman, Kevin J.; Yang, Junghoon; Jin, Chong; Li, Yingxiang; Floris, Davide; Swanson, Richard; Ng, Kimmie; Sicinska, Ewa; Anders, Lars; Zhao, Jean J.; Polyak, Kornelia; Anderson, Daniel G.; Li, Cheng; Sicinski, Piotr                                                          | CANCER CELL                      | 2017 | 31  | 4   | 36 | 9    |
| Targeting mutant p53 in cancer: a long road to precision therapy                                                            | Mantovani, Fiamma; Walerych, Dawid; Del Sal, Giannino                                                                                                                                                                                                                                                                                                                                                                                                                                       | FEBS JOURNAL                     | 2017 | 284 | 6   | 36 | 9    |
| Targeting the SR-B1 Receptor as a Gateway for Cancer Therapy and Imaging                                                    | Mooberry, Linda K.; Sabnis, Nirupama A.; Panchoo, Marlyn; Nagarajan, Bhavani; Lacko, Andras G.                                                                                                                                                                                                                                                                                                                                                                                              | FRONTIERS IN PHARMACOLOGY        | 2016 | 7   |     | 36 | 7,2  |
| When Genome Maintenance Goes Badly Awry                                                                                     | Kass, Elizabeth M.; Moynahan, Mary Ellen; Jasin, Maria                                                                                                                                                                                                                                                                                                                                                                                                                                      | MOLECULAR CELL                   | 2016 | 62  | 5   | 36 | 7,2  |

|                                                                                                                                                       |                                                                                                                                                                                                                                                                                                                                                                                                                                                  |                                 |      |     |    |    |     |
|-------------------------------------------------------------------------------------------------------------------------------------------------------|--------------------------------------------------------------------------------------------------------------------------------------------------------------------------------------------------------------------------------------------------------------------------------------------------------------------------------------------------------------------------------------------------------------------------------------------------|---------------------------------|------|-----|----|----|-----|
| The marine triterpene glycoside frondoside A exhibits activity in vitro and in vivo in prostate cancer                                                | Dyshlovoy, Sergey A.; Menchinskaya, Ekaterina S.; Venz, Simone; Rast, Stefanie; Amann, Kerstin; Hauschild, Jessica; Otte, Katharina; Kalinin, Vladimir I.; Silchenko, Alexandra S.; Avilov, Sergey A.; Alsdorf, Winfried; Madanchi, Ramin; Bokemeyer, Carsten; Schumacher, Udo; Walther, Reinhard; Aminin, Dmitry L.; Fedorov, Sergey N.; Shubina, Larisa K.; Stonik, Valentin A.; Balabanov, Stefan; Honecker, Friedemann; von Amsberg, Gunhild | INTERNATIONAL JOURNAL OF CANCER | 2016 | 138 | 10 | 36 | 7,2 |
| Integration of Metabolomics and Transcriptomics Reveals Major Metabolic Pathways and Potential Biomarker Involved in Prostate Cancer                  | Ren, Shancheng; Shao, Yaping; Zhao, Xinjie; Hong, Christopher S.; Wang, Fubo; Lu, Xin; Li, Jia; Ye, Guozhu; Yan, Min; Zhuang, Zhengping; Xu, Chuanliang; Xu, Guowang; Sun, Yinghao                                                                                                                                                                                                                                                               | MOLECULAR & CELLULAR PROTEOMICS | 2016 | 15  | 1  | 36 | 7,2 |
| Androgen receptor profiling predicts prostate cancer outcome                                                                                          | Stelloo, Suzan; Nevedomskaya, Ekaterina; van der Poel, Henk G.; de Jong, Jeroen; van Leenders, Geert J. L. H.; Jenster, Guido; Wessels, Lodewyk F. A.; Bergman, Andries M.; Zwart, Wilbert                                                                                                                                                                                                                                                       | EMBO MOLECULAR MEDICINE         | 2015 | 7   | 11 | 36 | 6   |
| Differential regulation of metabolic pathways by androgen receptor (AR) and its constitutively active splice variant, AR-V7, in prostate cancer cells | Shafi, Ayesha A.; Putluri, Vasanta; Arnold, James M.; Tsouko, Efrosini; Maity, Suman; Roberts, Justin M.; Coarfa, Cristian; Frigo, Daniel E.; Putluri, Nagireddy; Sreekumar, Arun; Weigel, Nancy L.                                                                                                                                                                                                                                              | ONCOTARGET                      | 2015 | 6   | 31 | 36 | 6   |
| C/D-box snoRNA-derived RNA production is associated with malignant transformation and metastatic progression in prostate cancer                       | Martens-Uzunova, Elena S.; Hoogstrate, Youri; Kalsbeek, Anton; Pigmans, Bas; Vredenburg-van den Berg, Mirella; Dits, Natasja; Nielsen, Soren Jensby; Baker, Adam; Visakorpi, Tapio; Bangma, Chris; Jenster, Guido                                                                                                                                                                                                                                | ONCOTARGET                      | 2015 | 6   | 19 | 36 | 6   |
| Top2a identifies and provides epigenetic rationale for novel combination therapeutic strategies for aggressive prostate cancer                        | Kirk, Jason S.; Schaarschuch, Kevin; Dalimov, Zafardjan; Lasorsa, Elena; Ku, ShengYu; Ramakrishnan, Swathi; Hu, Qiang; Azabdaftari, Gissou; Wang, Jianmin; Pili, Roberto; Ellis, Leigh                                                                                                                                                                                                                                                           | ONCOTARGET                      | 2015 | 6   | 5  | 36 | 6   |

|                                                                                                                        |                                                                                                                                                                                                                                                                                                                                  |                                             |      |    |    |    |      |
|------------------------------------------------------------------------------------------------------------------------|----------------------------------------------------------------------------------------------------------------------------------------------------------------------------------------------------------------------------------------------------------------------------------------------------------------------------------|---------------------------------------------|------|----|----|----|------|
| CHD1 loss sensitizes prostate cancer to DNA damaging therapy by promoting error-prone double-strand break repair       | Shenoy, T. R.; Boysen, G.; Wang, M. Y.; Xu, Q. Z.; Guo, W.; Koh, F. M.; Wang, C.; Zhang, L. Z.; Wang, Y.; Gil, V.; Aziz, S.; Christova, R.; Rodrigues, D. N.; Crespo, M.; Rescigno, P.; Tunariu, N.; Riisnaes, R.; Zafeiriou, Z.; Flohr, P.; Yuan, W.; Knight, E.; Swain, A.; Ramalho-Santos, M.; Xu, D. Y.; de Bono, J.; Wu, H. | ANNALS OF ONCOLOGY                          | 2017 | 28 | 7  | 35 | 8,75 |
| Genomic Insight into the Role of lncRNAs in Cancer Susceptibility                                                      | Gao, Ping; Wei, Gong-Hong                                                                                                                                                                                                                                                                                                        | INTERNATIONAL JOURNAL OF MOLECULAR SCIENCES | 2017 | 18 | 6  | 35 | 8,75 |
| Prostate cancer heterogeneity: Discovering novel molecular targets for therapy                                         | Ciccarese, Chiara; Massari, Francesco; Iacovelli, Roberto; Fiorentino, Michelangelo; Montironi, Rodolfo; Di Nunno, Vincenzo; Giunchi, Francesca; Brunelli, Matteo; Tortora, Giampaolo                                                                                                                                            | CANCER TREATMENT REVIEWS                    | 2017 | 54 |    | 35 | 8,75 |
| Long non-coding RNA urothelial carcinoma associated 1 (UCA1) mediates radiation response in prostate cancer            | Ghiam, Alireza Fotouhi; Taeb, Samira; Huang, Xiaoyong; Huang, Vincent; Ray, Jessica; Scarcello, Seville; Hoey, Christianne; Jahangiri, Sahar; Fokas, Emmanouil; Loblaw, Andrew; Bristow, Robert G.; Vesprini, Danny; Boutros, Paul; Liu, Stanley K.                                                                              | ONCOTARGET                                  | 2017 | 8  | 3  | 35 | 8,75 |
| Upregulation of long non-coding RNA PRNCR1 in colorectal cancer promotes cell proliferation and cell cycle progression | Yang, Liu; Qiu, Mantang; Xu, Youtao; Wang, Jie; Zheng, Yanyan; Li, Ming; Xu, Lin; Yin, Rong                                                                                                                                                                                                                                      | ONCOLOGY REPORTS                            | 2016 | 35 | 1  | 35 | 7    |
| Transcriptome Sequencing Reveals PCAT5 as a Novel ERG-Regulated Long Noncoding RNA in Prostate Cancer                  | Ylipaa, Antti; Kivinummi, Kati; Kohvakka, Annika; Annala, Matti; Latonen, Leena; Scaravilli, Mauro; Kartasalo, Kimmo; Leppanen, Simo-Pekka; Karakurt, Serdar; Seppala, Janne; Yli-Harja, Olli; Tammela, Teuvo L. J.; Zhang, Wei; Visakorpi, Tapio; Nykter, Matti                                                                 | CANCER RESEARCH                             | 2015 | 75 | 19 | 35 | 5,83 |

|                                                                                                            |                                                                                                                                                                                                                                                                                                                                                                                                 |                                                                                 |      |     |    |    |       |
|------------------------------------------------------------------------------------------------------------|-------------------------------------------------------------------------------------------------------------------------------------------------------------------------------------------------------------------------------------------------------------------------------------------------------------------------------------------------------------------------------------------------|---------------------------------------------------------------------------------|------|-----|----|----|-------|
| DNA Damage Response Assessments in Human Tumor Samples Provide Functional Biomarkers of Radiosensitivity   | Willers, Henning; Gheorghiu, Liliana; Liu, Qi; Efstathiou, Jason A.; Wirth, Lori J.; Krause, Mechthild; von Neubeck, Claere                                                                                                                                                                                                                                                                     | SEMINARS IN RADIATION ONCOLOGY                                                  | 2015 | 25  | 4  | 35 | 5,83  |
| Potent organo-osmium compound shifts metabolism in epithelial ovarian cancer cells                         | Hearn, Jessica M.; Romero-Canelon, Isolda; Munro, Alison F.; Fu, Ying; Pizarro, Ana M.; Garnett, Mathew J.; McDermott, Ultan; Carragher, Neil O.; Sadler, Peter J.                                                                                                                                                                                                                              | PROCEEDINGS OF THE NATIONAL ACADEMY OF SCIENCES OF THE UNITED STATES OF AMERICA | 2015 | 112 | 29 | 35 | 5,83  |
| Metabolomics-Derived Prostate Cancer Biomarkers: Fact or Fiction?                                          | Kumar, Deepak; Gupta, Ashish; Mandhani, Anil; Sankhwar, Satya Narain                                                                                                                                                                                                                                                                                                                            | JOURNAL OF PROTEOME RESEARCH                                                    | 2015 | 14  | 3  | 35 | 5,83  |
| Comprehensive Evaluation of Programmed Death-Ligand 1 Expression in Primary and Metastatic Prostate Cancer | Haffner, Michael C.; Guner, Gunes; Taheri, Diana; Netto, George J.; Palsgrove, Doreen N.; Zheng, Qizhi; Guedes, Liana Benevides; Kim, Kunhwa; Tsai, Harrison; Esopi, David M.; Lotan, Tamara L.; Sharma, Rajni; Meeker, Alan K.; Chinnaiyan, Arul M.; Nelson, William G.; Yegnasubramania, Srinivasan; Luo, Jun; Mehra, Rohit; Antonarakis, Emmanuel S.; Drake, Charles G.; de Marzo, Angelo M. | AMERICAN JOURNAL OF PATHOLOGY                                                   | 2018 | 188 | 6  | 34 | 11,33 |
| Nutrigenomics in cancer: Revisiting the effects of natural compounds                                       | Braicu, Cornelia; Mehterov, Nikolay; Vladimirov, Boyan; Sarafian, Victoria; Nabavi, Seyed Mohammad; Atanasov, Atanas G.; Berindan-Neagoe, Ioana                                                                                                                                                                                                                                                 | SEMINARS IN CANCER BIOLOGY                                                      | 2017 | 46  |    | 34 | 8,5   |
| miR-143-3p targeting LIM domain kinase 1 suppresses the progression of triple-negative breast cancer cells | Li, Dengfeng; Hu, Jiashu; Song, Hongming; Xu, Hui; Wu, Chengyang; Zhao, Bingkun; Xie, Dan; Wu, Tianqi; Zhao, Junyong; Fang, Lin                                                                                                                                                                                                                                                                 | AMERICAN JOURNAL OF TRANSLATIONAL RESEARCH                                      | 2017 | 9   | 5  | 34 | 8,5   |



|                                                                                                                                                                                 |                                                                                                                                                                                                                                                                                                                                                                                                                                                                                                                                                                                                                                                                                                                                                                                                                                                 |                           |      |     |    |    |     |
|---------------------------------------------------------------------------------------------------------------------------------------------------------------------------------|-------------------------------------------------------------------------------------------------------------------------------------------------------------------------------------------------------------------------------------------------------------------------------------------------------------------------------------------------------------------------------------------------------------------------------------------------------------------------------------------------------------------------------------------------------------------------------------------------------------------------------------------------------------------------------------------------------------------------------------------------------------------------------------------------------------------------------------------------|---------------------------|------|-----|----|----|-----|
| Individual patient data meta-analysis shows a significant association between the ATM rs1801516 SNP and toxicity after radiotherapy in 5456 breast and prostate cancer patients | Andreassen, Christian Nicolaj; Rosenstein, Barry S.; Kerns, Sarah L.; Ostrer, Harry; De Ruyscher, Dirk; Cesaretti, Jamie A.; Barnett, Gillian C.; Dunning, Alison M.; Dorling, Leila; West, Catharine M. L.; Burnet, Neil G.; Elliott, Rebecca; Coles, Charlotte; Hall, Emma; Fachal, Laura; Vega, Ana; Gomez-Caamano, Antonio; Talbot, Christopher J.; Symonds, R. Paul; De Ruyck, Kim; Thierens, Hubert; Ost, Piet; Chang-Claude, Jenny; Seibold, Petra; Popanda, Odilia; Overgaard, Marie; Dearnaley, David; Sydes, Matthew R.; Azria, David; Koch, Christine Anne; Parliament, Matthew; Blackshaw, Michael; Sia, Michael; Fuentes-Raspall, Maria J.; Ramon y Cajal, Teresa; Barnadas, Agustin; Vesprini, Danny; Gutierrez-Enriquez, Sara; Molla, Meritxell; Diez, Orland; Yarnold, John R.; Overgaard, Jens; Bentzen, Soren M.; Alsner, Jan | RADIOTHERAPY AND ONCOLOGY | 2016 | 121 | 3  | 34 | 6,8 |
| The long non-coding RNA EPB41L4A-AS2 inhibits tumor proliferation and is associated with favorable prognoses in breast cancer and other solid tumors                            | Xu, Shouping; Wang, Peiyuan; You, Zilong; Meng, Hongxue; Mu, Guannan; Bai, Xianan; Zhang, Guangwen; Zhang, Jinfeng; Pang, Da                                                                                                                                                                                                                                                                                                                                                                                                                                                                                                                                                                                                                                                                                                                    | ONCOTARGET                | 2016 | 7   | 15 | 34 | 6,8 |
| Proteomic Profiling of Serum-Derived Exosomes from Ethnically Diverse Prostate Cancer Patients                                                                                  | Turay, David; Khan, Salma; Osterman, Carlos J. Diaz; Curtis, Matthew P.; Khaira, Balreet; Neidigh, Jonathan W.; Mirshahidi, Saied; Casiano, Carlos A.; Wall, Nathan R.                                                                                                                                                                                                                                                                                                                                                                                                                                                                                                                                                                                                                                                                          | CANCER INVESTIGATION      | 2016 | 34  | 1  | 34 | 6,8 |
| Adverse Pathologic Features at Radical Prostatectomy: Effect of Preoperative Risk on Oncologic Outcomes                                                                         | Imnadze, Mariam; Sjoberg, Daniel D.; Vickers, Andrew J.                                                                                                                                                                                                                                                                                                                                                                                                                                                                                                                                                                                                                                                                                                                                                                                         | EUROPEAN UROLOGY          | 2016 | 69  | 1  | 34 | 6,8 |

|                                                                                                                                                          |                                                                                                                                                                                                                                                                                                                                                                                                                                                                                                                                                                                                                                                                                                                                                                                                |                                 |      |     |    |    |      |
|----------------------------------------------------------------------------------------------------------------------------------------------------------|------------------------------------------------------------------------------------------------------------------------------------------------------------------------------------------------------------------------------------------------------------------------------------------------------------------------------------------------------------------------------------------------------------------------------------------------------------------------------------------------------------------------------------------------------------------------------------------------------------------------------------------------------------------------------------------------------------------------------------------------------------------------------------------------|---------------------------------|------|-----|----|----|------|
| Long Noncoding RNAs in Urine Are Detectable and May Enable Early Detection of Acute T Cell-Mediated Rejection of Renal Allografts                        | Lorenzen, Johan M.; Schauerte, Celina; Koelling, Melte; Huebner, Anika; Knapp, Monika; Haller, Hermann; Thuml, Thomas                                                                                                                                                                                                                                                                                                                                                                                                                                                                                                                                                                                                                                                                          | CLINICAL CHEMISTRY              | 2015 | 61  | 12 | 34 | 5,67 |
| A multicenter study shows PTEN deletion is strongly associated with seminal vesicle involvement and extracapsular extension in localized prostate cancer | Troyer, Dean A.; Jamaspishvili, Tamara; Wei, Wei; Feng, Ziding; Good, Jennifer; Hawley, Sarah; Fazli, Ladan; McKenney, Jesse K.; Simko, Jeff; Hurtado-Coll, Antonio; Carroll, Peter R.; Gleave, Martin; Lance, Raymond; Lin, Daniel W.; Nelson, Peter S.; Thompson, Ian M.; True, Lawrence D.; Brooks, James D.; Squire, Jeremy A.                                                                                                                                                                                                                                                                                                                                                                                                                                                             | PROSTATE                        | 2015 | 75  | 11 | 34 | 5,67 |
| Radiogenomics helps to achieve personalized therapy by evaluating patient responses to radiation treatment                                               | Guo, Zhen; Shu, Yan; Zhou, Honghao; Zhang, Wei; Wang, Hui                                                                                                                                                                                                                                                                                                                                                                                                                                                                                                                                                                                                                                                                                                                                      | CARCINOGENESIS                  | 2015 | 36  | 3  | 34 | 5,67 |
| Generalizability of established prostate cancer risk variants in men of African ancestry                                                                 | Han, Ying; Signorello, Lisa B.; Strom, Sara S.; Kittles, Rick A.; Rybicki, Benjamin A.; Stanford, Janet L.; Goodman, Phyllis J.; Berndt, Sonja I.; Carpten, John; Casey, Graham; Chu, Lisa; Conti, David V.; Rand, Kristin A.; Diver, W. Ryan; Hennis, Anselm J. M.; John, Esther M.; Kibel, Adam S.; Klein, Eric A.; Kolb, Suzanne; Le Marchand, Loic; Leske, M. Cristina; Murphy, Adam B.; Neslund-Dudas, Christine; Park, Jong Y.; Pettaway, Curtis; Rebbeck, Timothy R.; Gapstur, Susan M.; Zheng, S. Lilly; Wu, Suh-Yuh; Witte, John S.; Xu, Jianfeng; Isaacs, William; Ingles, Sue A.; Hsing, Ann; Easton, Douglas F.; Eeles, Rosalind A.; Schumacher, Fredrick R.; Chanock, Stephen; Nemesure, Barbara; Blot, William J.; Stram, Daniel O.; Henderson, Brian E.; Haiman, Christopher A. | INTERNATIONAL JOURNAL OF CANCER | 2015 | 136 | 5  | 34 | 5,67 |

|                                                                                               |                                                                                                                                                                                                                                                                                                                                                                                                                                                                                                                                                                                      |                                                          |      |    |    |    |      |
|-----------------------------------------------------------------------------------------------|--------------------------------------------------------------------------------------------------------------------------------------------------------------------------------------------------------------------------------------------------------------------------------------------------------------------------------------------------------------------------------------------------------------------------------------------------------------------------------------------------------------------------------------------------------------------------------------|----------------------------------------------------------|------|----|----|----|------|
| Polyphenols: dietary assessment and role in the prevention of cancers                         | Rothwell, Joseph A.; Knaze, Viktoria; Zamora-Ros, Raul                                                                                                                                                                                                                                                                                                                                                                                                                                                                                                                               | CURRENT OPINION IN CLINICAL NUTRITION AND METABOLIC CARE | 2017 | 20 | 6  | 33 | 8,25 |
| Metabolic characterization and pathway analysis of berberine protects against prostate cancer | Li, Xianna; Zhang, Aihua; Sun, Hui; Liu, Zhidong; Zhang, Tianlei; Qiu, Shi; Liu, Liang; Wang, Xijun                                                                                                                                                                                                                                                                                                                                                                                                                                                                                  | ONCOTARGET                                               | 2017 | 8  | 39 | 33 | 8,25 |
| Improving radiotherapy in cancer treatment: Promises and challenges                           | Chen, Helen H. W.; Kuo, Macus Tien                                                                                                                                                                                                                                                                                                                                                                                                                                                                                                                                                   | ONCOTARGET                                               | 2017 | 8  | 37 | 33 | 8,25 |
| Exome Sequencing of African-American Prostate Cancer Reveals Loss-of-Function ERF Mutations   | Huang, Franklin W.; Mosquera, Juan Miguel; Garofalo, Andrea; Oh, Coyin; Baco, Maria; Amin-Mansour, Ali; Rabasha, Bokang; Bahl, Samira; Mullane, Stephanie A.; Robinson, Brian D.; Aldubayan, Saud; Khani, Francesca; Karir, Beerinder; Kim, Eejung; Chimene-Weiss, Jeremy; Hofree, Matan; Romanel, Alessandro; Osborne, Joseph R.; Kim, Jong Wook; Azabdaftari, Gissou; Woloszynska-Read, Anna; Sfanos, Karen; De Marzo, Angelo M.; Demichelis, Francesca; Gabriel, Stacey; Van Allen, Eliezer M.; Mesirov, Jill; Tamayo, Pablo; Rubin, Mark A.; Powell, Isaac J.; Garraway, Levi A. | CANCER DISCOVERY                                         | 2017 | 7  | 9  | 33 | 8,25 |
| Label-free isolation of prostate circulating tumor cells using Vortex microfluidic technology | Renier, Corinne; Pao, Edward; Che, James; Liu, Haiyan E.; Lemaire, Clementine A.; Matsumoto, Melissa; Triboulet, Melanie; Srivinas, Sandy; Jeffrey, Stefanie S.; Rettig, Matthew; Kulkarni, Rajan P.; Di Carlo, Dino; Sollier-Christen, Elodie                                                                                                                                                                                                                                                                                                                                       | NPJ PRECISION ONCOLOGY                                   | 2017 | 1  |    | 33 | 8,25 |

|                                                                                                                                          |                                                                                                                                                                                                                                                                                                                                             |                                 |      |     |    |    |      |
|------------------------------------------------------------------------------------------------------------------------------------------|---------------------------------------------------------------------------------------------------------------------------------------------------------------------------------------------------------------------------------------------------------------------------------------------------------------------------------------------|---------------------------------|------|-----|----|----|------|
| LincRNA-p21: function and mechanism in cancer                                                                                            | Chen, Shaoyun; Liang, Hairong; Yang, Hui; Zhou, Kairu; Xu, Longmei; Liu, Jiaxian; Lai, Bei; Song, Li; Luo, Hao; Peng, Jianming; Liu, Zhidong; Xiao, Yongmei; Chen, Wen; Tang, Huanwen                                                                                                                                                       | MEDICAL ONCOLOGY                | 2017 | 34  | 5  | 33 | 8,25 |
| Targeted proteomics in urinary extracellular vesicles identifies biomarkers for diagnosis and prognosis of prostate cancer               | Sequeiros, Tamara; Rigau, Marina; Chiva, Cristina; Montes, Melania; Garcia-Grau, Iolanda; Garcia, Marta; Diaz, Sherley; Celma, Ana; Bijnsdorp, Irene; Campos, Alex; Di Mauro, Primiano; Borros, Salvador; Reventos, Jaume; Doll, Andreas; Paciucci, Rosanna; Pegtel, Michiel; de Torres, Ines; Sabido, Eduard; Morote, Juan; Olivan, Mireia | ONCOTARGET                      | 2017 | 8   | 3  | 33 | 8,25 |
| Liquid biopsy: ready to guide therapy in advanced prostate cancer?                                                                       | Hegemann, Miriam; Stenzl, Arnulf; Bedke, Jens; Chi, Kim N.; Black, Peter C.; Todenhofer, Tilman                                                                                                                                                                                                                                             | BJU INTERNATIONAL               | 2016 | 118 | 6  | 33 | 6,6  |
| Identification of candidate anti-cancer molecular mechanisms of compound kushen injection using functional genomics                      | Qu, Zhipeng; Cui, Jian; Harata-Lee, Yuka; Aung, Thazin Nwe; Feng, Qianjin; Raison, Joy M.; Kortschak, Robert Daniel; Adelson, David L.                                                                                                                                                                                                      | ONCOTARGET                      | 2016 | 7   | 40 | 33 | 6,6  |
| Proteomics analysis of malignant and benign prostate tissue by 2D DIGE/MS reveals new insights into proteins involved in prostate cancer | Davalieva, Katarina; Kostovska, Ivana Maleva; Kiprijanovska, Sanja; Markoska, Katerina; Kubelka-Sabit, Katerina; Filipovski, Vanja; Stavridis, Sotir; Stankov, Oliver; Komina, Selim; Petrusevska, Gordana; Polenakovic, Momir                                                                                                              | PROSTATE                        | 2015 | 75  | 14 | 33 | 5,5  |
| Elevated expression of UBE2T exhibits oncogenic properties in human prostate cancer                                                      | Wen, Mingxin; Kwon, Yongwon; Wang, Yongsheng; Mao, Jian-Hua; Wei, Guangwei                                                                                                                                                                                                                                                                  | ONCOTARGET                      | 2015 | 6   | 28 | 33 | 5,5  |
| Novel biomarkers and genomic tests in prostate cancer: a critical analysis                                                               | Falzarano, S. M.; Ferro, M.; Bollito, E.; Klein, E. A.; Carrieri, G.; Magi-Galluzzi, C.                                                                                                                                                                                                                                                     | MINERVA UROLOGICA E NEFROLOGICA | 2015 | 67  | 3  | 33 | 5,5  |
| Ligand-dependent genomic function of glucocorticoid receptor in triple-negative breast cancer                                            | Chen, Zhong; Lan, Xun; Wu, Dayong; Sunkel, Benjamin; Ye, Zhenqing; Huang, Jiaoti; Liu, Zhihua; Clinton, Steven K.; Jin, Victor X.; Wang, Qianben                                                                                                                                                                                            | NATURE COMMUNICATIONS           | 2015 | 6   |    | 33 | 5,5  |

|                                                                                                                                                |                                                                                                                                                                                                                                                                                                                                                                                                    |                                  |      |    |       |    |       |
|------------------------------------------------------------------------------------------------------------------------------------------------|----------------------------------------------------------------------------------------------------------------------------------------------------------------------------------------------------------------------------------------------------------------------------------------------------------------------------------------------------------------------------------------------------|----------------------------------|------|----|-------|----|-------|
| Transcriptome profiling of esophageal squamous cell carcinoma reveals a long noncoding RNA acting as a tumor suppressor                        | Wei, Guifeng; Luo, Huaxia; Sun, Yu; Li, Jiagen; Tian, Liqing; Liu, Wei; Liu, Lihui; Luo, Jianjun; He, Jie; Chen, Runsheng                                                                                                                                                                                                                                                                          | ONCOTARGET                       | 2015 | 6  | 19    | 33 | 5,5   |
| Capillary zone electrophoresis on-line coupled to mass spectrometry: A perspective application for clinical proteomics                         | Pejchinovski, Martin; Hrnjez, Dajana; Ramirez-Torres, Adela; Bitsika, Vasiliki; Mermelekas, George; Vlahou, Antonia; Zuerbig, Petra; Mischak, Harald; Metzger, Jochen; Koeck, Thomas                                                                                                                                                                                                               | PROTEOMICS CLINICAL APPLICATIONS | 2015 | 9  | 5-6   | 33 | 5,5   |
| Quantitative Nuclear Proteomics Identifies that miR-137-mediated EZH2 Reduction Regulates Resveratrol-induced Apoptosis of Neuroblastoma Cells | Ren, Xiaoqing; Bai, Xue; Zhang, Xuefei; Li, Zheyi; Tang, Lingfang; Zhao, Xuyang; Li, Zeyang; Ren, Yanfei; Wei, Shicheng; Wang, Qingsong; Liu, Cong; Ji, Jianguo                                                                                                                                                                                                                                    | MOLECULAR & CELLULAR PROTEOMICS  | 2015 | 14 | 2     | 33 | 5,5   |
| Proteomics analysis of urine reveals acute phase response proteins as candidate diagnostic biomarkers for prostate cancer                      | Davalieva, Katarina; Kiprijanovska, Sanja; Komina, Selim; Petrusevska, Gordana; Zografska, Natasha Chokrevska; Polenakovic, Momir                                                                                                                                                                                                                                                                  | PROTEOME SCIENCE                 | 2015 | 13 |       | 33 | 5,5   |
| Genetics and biology of prostate cancer                                                                                                        | Wang, Guocan; Zhao, Di; Spring, Denise J.; DePinho, Ronald A.                                                                                                                                                                                                                                                                                                                                      | GENES & DEVELOPMENT              | 2018 | 32 | 17-18 | 32 | 10,67 |
| Clinical Outcome of Prostate Cancer Patients with Germline DNA Repair Mutations: Retrospective Analysis from an International Study            | Mateo, Joaquin; Cheng, Heather H.; Beltran, Himisha; Dolling, David; Xu, Wen; Pritchard, Colin C.; Mossop, Helen; Rescigno, Pasquale; Perez-Lopez, Raquel; Sailer, Verena; Kolinsky, Michael; Balasopoulou, Ada; Bertan, Claudia; Nanus, David M.; Tagawa, Scott T.; Thorne, Heather; Montgomery, Bruce; Carreira, Suzanne; Sandhu, Shahneen; Rubin, Mark A.; Nelson, Peter S.; de Bono, Johann S. | EUROPEAN UROLOGY                 | 2018 | 73 | 5     | 32 | 10,67 |

|                                                                                                                                                          |                                                                                                                                                                                                                                                                                                                                                                                                                                                                    |                                         |      |    |    |    |   |
|----------------------------------------------------------------------------------------------------------------------------------------------------------|--------------------------------------------------------------------------------------------------------------------------------------------------------------------------------------------------------------------------------------------------------------------------------------------------------------------------------------------------------------------------------------------------------------------------------------------------------------------|-----------------------------------------|------|----|----|----|---|
| Ability of a Genomic Classifier to Predict Metastasis and Prostate Cancer-specific Mortality after Radiation or Surgery based on Needle Biopsy Specimens | Nguyen, Paul L.; Haddad, Zaid; Ross, Ashley E.; Martin, Neil E.; Deheshi, Samineh; Lam, Lucia L. C.; Chelliserry, Jijumon; Tosoian, Jeffrey J.; Lotan, Tamara L.; Spratt, Daniel E.; Stoyanova, Radka S.; Punnen, Sanoj; Ong, Kaye; Buerki, Christine; Aranes, Maria; Kolisnik, Tyler; Margrave, Jennifer; Yousefi, Kasra; Choeurng, Voleak; Davicioni, Elai; Trock, Bruce J.; Kane, Christopher J.; Pollack, Alan; Davis, John W.; Feng, Felix Y.; Klein, Eric A. | EUROPEAN UROLOGY                        | 2017 | 72 | 5  | 32 | 8 |
| Bioorthogonal Labeling of Human Prostate Cancer Tissue Slice Cultures for Glycoproteomics                                                                | Spiciarich, David R.; Nolley, Rosalie; Maund, Sophia L.; Purcell, Sean C.; Herschel, Jason; Iavarone, Anthony T.; Peehl, Donna M.; Bertozzi, Carolyn R.                                                                                                                                                                                                                                                                                                            | ANGEWANDTE CHEMIE-INTERNATIONAL EDITION | 2017 | 56 | 31 | 32 | 8 |
| Alternative splicing promotes tumour aggressiveness and drug resistance in African American prostate cancer                                              | Wang, Bi-Dar; Ceniccola, Kristin; Hwang, Sujin; Andrawis, Ramez; Horvath, Anelia; Freedman, Jennifer A.; Olender, Jacqueline; Knapp, Stefan; Ching, Travers; Garmire, Lana; Patel, Vyomesh; Garcia-Blanco, Mariano A.; Patierno, Steven R.; Lee, Norman H.                                                                                                                                                                                                         | NATURE COMMUNICATION S                  | 2017 | 8  |    | 32 | 8 |
| AKT1 and AKT2 isoforms play distinct roles during breast cancer progression through the regulation of specific downstream proteins                       | Riggio, Marina; Perrone, Maria C.; Polo, Maria L.; Rodriguez, Maria J.; May, Maria; Abba, Martin; Lanari, Claudia; Novaro, Virginia                                                                                                                                                                                                                                                                                                                                | SCIENTIFIC REPORTS                      | 2017 | 7  |    | 32 | 8 |
| Prostate Cancer Genetics: Variation by Race, Ethnicity, and Geography                                                                                    | Rebbeck, Timothy R.                                                                                                                                                                                                                                                                                                                                                                                                                                                | SEMINARS IN RADIATION ONCOLOGY          | 2017 | 27 | 1  | 32 | 8 |

|                                                                                                                                            |                                                                                                                                                                                                                                                                                                                                                                                                                                                                                                                               |                                  |      |    |    |    |      |
|--------------------------------------------------------------------------------------------------------------------------------------------|-------------------------------------------------------------------------------------------------------------------------------------------------------------------------------------------------------------------------------------------------------------------------------------------------------------------------------------------------------------------------------------------------------------------------------------------------------------------------------------------------------------------------------|----------------------------------|------|----|----|----|------|
| Meta-analysis of Genome Wide Association Studies Identifies Genetic Markers of Late Toxicity Following Radiotherapy for Prostate Cancer    | Kerns, Sarah L.; Dorling, Leila; Fachal, Laura; Bentzen, Soren; Pharoah, Paul D. P.; Barnes, Daniel R.; Gomez-Caamano, Antonio; Carballo, Ana M.; Dearnaley, David P.; Peleteiro, Paula; Gulliford, Sarah L.; Hall, Emma; Michailidou, Kyriaki; Carracedo, Angel; Sia, Michael; Stock, Richard; Stone, Nelson N.; Sydes, Matthew R.; Tyrer, Jonathan P.; Ahmed, Shahana; Parliament, Matthew; Ostrer, Harry; Rosenstein, Barry S.; Vega, Ana; Burnet, Neil G.; Dunning, Alison M.; Barnett, Gillian C.; West, Catharine M. L. | EBIOMEDICINE                     | 2016 | 10 |    | 32 | 6,4  |
| Application of a Clinical Whole-Transcriptome Assay for Staging and Prognosis of Prostate Cancer Diagnosed in Needle Core Biopsy Specimens | Knudsen, Beatrice S.; Kim, Hyung L.; Erho, Nicholas; Shin, Heesun; Alshatalfa, Mohammed; Lam, Lucia L. C.; Tenggara, Imelda; Chadwich, Karen; Van Der Kwast, Theo; Fleshner, Neil; Davicioni, Elai; Carroll, Peter R.; Cooperberg, Matthew R.; Chan, June M.; Simko, Jeffry P.                                                                                                                                                                                                                                                | JOURNAL OF MOLECULAR DIAGNOSTICS | 2016 | 18 | 3  | 32 | 6,4  |
| Incorporation of tissue-based genomic biomarkers into localized prostate cancer clinics                                                    | Moschini, Marco; Spahn, Martin; Mattei, Agostino; Cheville, John; Karnes, R. Jeffrey                                                                                                                                                                                                                                                                                                                                                                                                                                          | BMC MEDICINE                     | 2016 | 14 |    | 32 | 6,4  |
| Beyond proliferation: KLF5 promotes angiogenesis of bladder cancer through directly regulating VEGFA transcription                         | Gao, Yang; Wu, Kaijie; Chen, Yule; Zhou, Jiancheng; Du, Chong; Shi, Qi; Xu, Shan; Jia, Jing; Tang, Xiaoshuang; Li, Feng; Hui, Ke; He, Dalin; Guo, Peng                                                                                                                                                                                                                                                                                                                                                                        | ONCOTARGET                       | 2015 | 6  | 41 | 32 | 5,33 |
| Evaluation of Antioxidative and Cytotoxic Activities of Streptomyces pluripotens MUSC 137 Isolated from Mangrove Soil in Malaysia          | Ser, Hooi-Leng; Ab Mutalib, Nurul-Syakima; Yin, Wai-Fong; Chan, Kok-Gan; Goh, Bey-Hing; Lee, Learn-Han                                                                                                                                                                                                                                                                                                                                                                                                                        | FRONTIERS IN MICROBIOLOGY        | 2015 | 6  |    | 32 | 5,33 |
| Molecular landscape of prostate cancer: Implications for current clinical trials                                                           | Khemlina, Galina; Ikeda, Sadakatsu; Kurzrock, Razelle                                                                                                                                                                                                                                                                                                                                                                                                                                                                         | CANCER TREATMENT REVIEWS         | 2015 | 41 | 9  | 32 | 5,33 |

|                                                                                       |                                                                                                                                                                                                                                                                                                                                                                                                                                                                                                                                                                                                                                                                                                                                                                                                                                                                                                                                                                                                                                                                                                                                                    |                            |      |    |    |    |       |
|---------------------------------------------------------------------------------------|----------------------------------------------------------------------------------------------------------------------------------------------------------------------------------------------------------------------------------------------------------------------------------------------------------------------------------------------------------------------------------------------------------------------------------------------------------------------------------------------------------------------------------------------------------------------------------------------------------------------------------------------------------------------------------------------------------------------------------------------------------------------------------------------------------------------------------------------------------------------------------------------------------------------------------------------------------------------------------------------------------------------------------------------------------------------------------------------------------------------------------------------------|----------------------------|------|----|----|----|-------|
| Prediction of Individual Genetic Risk to Prostate Cancer Using a Polygenic Score      | Szulkin, Robert; Whittington, Thomas; Eklund, Martin; Aly, Markus; Eeles, Rosalind A.; Easton, Douglas; Kote-Jarai, ZSofia; Al Olama, Ali Amin; Benlloch, Sara; Muir, Kenneth; Giles, Graham G.; Southey, Melissa C.; Fitzgerald, Liesel M.; Henderson, Brian E.; Schumacher, Fredrick; Haiman, Christopher A.; Schleutker, Johanna; Wahlfors, Tiina; Tammela, Teuvo L. J.; Nordestgaard, Borge G.; Key, Tim J.; Travis, Ruth C.; Neal, David E.; Donovan, Jenny L.; Hamdy, Freddie C.; Pharoah, Paul; Pashayan, Nora; Khaw, Kay-Tee; Stanford, Janet L.; Thibodeau, Stephen N.; McDonnell, Shannon K.; Schaid, Daniel J.; Maier, Christiane; Vogel, Walther; Luedeke, Manuel; Herkommer, Kathleen; Kibel, Adam S.; Cybulski, Cezary; Lubinski, Jan; Kluzniak, Wojciech; Cannon-Albright, Lisa; Brenner, Hermann; Butterbach, Katja; Stegmaier, Christa; Park, Jong Y.; Sellers, Thomas; Lim, Hui-Yi; Slavov, Chavdar; Kaneva, Radka; Mitev, Vanio; Batra, Jyotsna; Clements, Judith A.; Spurdle, Amanda; Teixeira, Manuel R.; Paulo, Paula; Maia, Sofia; Pandha, Hardev; Michael, Agnieszka; Kierzek, Andrzej; Gronberg, Henrik; Wiklund, Fredrik | PROSTATE                   | 2015 | 75 | 13 | 32 | 5,33  |
| TRPM8 channel as a novel molecular target in androgen-regulated prostate cancer cells | Asuthkar, Swapna; Velpula, Kiran Kumar; Elustondo, Pia A.; Demirkhanyan, Lusine; Zakharian, Eleonora                                                                                                                                                                                                                                                                                                                                                                                                                                                                                                                                                                                                                                                                                                                                                                                                                                                                                                                                                                                                                                               | ONCOTARGET                 | 2015 | 6  | 19 | 32 | 5,33  |
| The Androgen Receptor in Breast Cancer                                                | Giovannelli, Pia; Di Donato, Marzia; Galasso, Giovanni; Di Zazzo, Erika; Bilancio, Antonio; Migliaccio, Antimo                                                                                                                                                                                                                                                                                                                                                                                                                                                                                                                                                                                                                                                                                                                                                                                                                                                                                                                                                                                                                                     | FRONTIERS IN ENDOCRINOLOGY | 2018 | 9  |    | 31 | 10,33 |



|                                                                                                                          |                                                                                                                                                                                                                                                                                                                  |                                             |      |     |    |    |       |
|--------------------------------------------------------------------------------------------------------------------------|------------------------------------------------------------------------------------------------------------------------------------------------------------------------------------------------------------------------------------------------------------------------------------------------------------------|---------------------------------------------|------|-----|----|----|-------|
| MiR-25-3p promotes the proliferation of triple negative breast cancer by targeting BTG2                                  | Chen, Hua; Pan, Hong; Qian, Yi; Zhou, Wenbin; Liu, Xiaolan                                                                                                                                                                                                                                                       | MOLECULAR CANCER                            | 2018 | 17  |    | 31 | 10,33 |
| The Role of Gut Microbiome in the Pathogenesis of Prostate Cancer: A Prospective, Pilot Study                            | Golombos, David M.; Ayangbesan, Abimbola; O'Malley, Padraic; Lewicki, Patrick; Barlow, LaMont; Barbieri, Christopher E.; Chan, Chrystal; DuLong, Casey; Abu-Ali, Galeb; Huttenhower, Curtis; Scherr, Douglas S.                                                                                                  | UROLOGY                                     | 2018 | 111 |    | 31 | 10,33 |
| Nucleic Acid Aptamers: Emerging Applications in Medical Imaging, Nanotechnology, Neurosciences, and Drug Delivery        | Rothlisberger, Pascal; Gasse, Cecile; Hollenstein, Marcel                                                                                                                                                                                                                                                        | INTERNATIONAL JOURNAL OF MOLECULAR SCIENCES | 2017 | 18  | 11 | 31 | 7,75  |
| Circulating mRNAs and miRNAs as candidate markers for the diagnosis and prognosis of prostate cancer                     | de Souza, Marilesia Ferreira; Kuasne, Hellen; Barros-Filho, Mateus de Camargo; Cilio, Heloisa Lizotti; Marchi, Fabio Albuquerque; Fuganti, Paulo Emilio; Paschoal, Alexandre Rossi; Rogatto, Silvia Regina; de Syllos Colus, Ilce Mara                                                                           | PLOS ONE                                    | 2017 | 12  | 9  | 31 | 7,75  |
| Comprehensive proteomics analysis of exosomes derived from human seminal plasma                                          | Yang, C.; Guo, W. -b.; Zhang, W. -s.; Bian, J.; Yang, J. -k.; Zhou, Q. -z.; Chen, M. -k.; Peng, W.; Qi, T.; Wang, C. -y.; Liu, C. -d.                                                                                                                                                                            | ANDROLOGY                                   | 2017 | 5   | 5  | 31 | 7,75  |
| Patient-derived xenografts as in vivo models for research in urological malignancies                                     | Inoue, Takahiro; Terada, Naoki; Kobayashi, Takashi; Ogawa, Osamu                                                                                                                                                                                                                                                 | NATURE REVIEWS UROLOGY                      | 2017 | 14  | 5  | 31 | 7,75  |
| Comprehensive Drug Testing of Patient-derived Conditionally Reprogrammed Cells from Castration-resistant Prostate Cancer | Saeed, Khalid; Rahkama, Vesa; Eldfors, Samuli; Bychkov, Dmitry; Mpindi, John Patrick; Yadav, Bhagwan; Paavolainen, Lassi; Aittokallio, Tero; Heckman, Caroline; Wennerberg, Krister; Peehl, Donna M.; Horvath, Peter; Mirtti, Tuomas; Rannikko, Antti; Kallioniemi, Olli; Ostling, Paivi; af Hallstrom, Taija M. | EUROPEAN UROLOGY                            | 2017 | 71  | 3  | 31 | 7,75  |

|                                                                                                                                                                   |                                                                                                                                                                                                                                                                                                                           |                                   |      |     |   |    |      |
|-------------------------------------------------------------------------------------------------------------------------------------------------------------------|---------------------------------------------------------------------------------------------------------------------------------------------------------------------------------------------------------------------------------------------------------------------------------------------------------------------------|-----------------------------------|------|-----|---|----|------|
| The Emergence of Precision Urologic Oncology: A Collaborative Review on Biomarker-driven Therapeutics                                                             | Barbieri, Christopher E.; Chinnaiyan, Arul M.; Lerner, Seth P.; Swanton, Charles; Rubin, Mark A.                                                                                                                                                                                                                          | EUROPEAN UROLOGY                  | 2017 | 71  | 2 | 31 | 7,75 |
| Multi-institutional Analysis Shows that Low PCAT-14 Expression Associates with Poor Outcomes in Prostate Cancer                                                   | White, Nicole M.; Zhao, Shuang G.; Zhang, Jin; Rozycki, Emily B.; Dang, Ha X.; McFadden, Sandra D.; Eteleeb, Abdallah M.; Alshalalfa, Mohammed; Vergara, Ismael A.; Erho, Nicholas; Arbeit, Jeffrey M.; Karnes, Robert Jeffrey; Den, Robert B.; Davicioni, Elai; Maher, Christopher A.                                    | EUROPEAN UROLOGY                  | 2017 | 71  | 2 | 31 | 7,75 |
| Dysregulation of miR-212 Promotes Castration Resistance through hnRNPH1-Mediated Regulation of AR and AR-V7: Implications for Racial Disparity of Prostate Cancer | Yang, Yijun; Jia, Dingwu; Kim, Hogyoung; Elmageed, Zakaria Y. Abd; Datta, Amrita; Davis, Rodney; Srivastav, Sudesh; Moroz, Krzysztof; Crawford, Byron E.; Moparty, Krishnarao; Thomas, Raju; Hudson, Robert S.; Ambs, Stefan; Abdel-Mageed, Asim B.                                                                       | CLINICAL CANCER RESEARCH          | 2016 | 22  | 7 | 31 | 6,2  |
| Prostasomes as a source of diagnostic biomarkers for prostate cancer                                                                                              | Zijlstra, Carla; Stoorvogel, Willem                                                                                                                                                                                                                                                                                       | JOURNAL OF CLINICAL INVESTIGATION | 2016 | 126 | 4 | 31 | 6,2  |
| The Thr300Ala variant in ATG16L1 is associated with improved survival in human colorectal cancer and enhanced production of type I interferon                     | Grimm, Wesley A.; Messer, Jeannette S.; Murphy, Stephen F.; Nero, Thomas; Lodolce, James P.; Weber, Christopher R.; Logsdon, Mark F.; Bartulis, Sarah; Sylvester, Brooke E.; Springer, Amanda; Dougherty, Urszula; Niewold, Timothy B.; Kupfer, Sonia S.; Ellis, Nathan; Huo, Dezheng; Bissonnette, Marc; Boone, David L. | GUT                               | 2016 | 65  | 3 | 31 | 6,2  |
| Tumor-suppressive microRNAs (miR-26a/b, miR-29a/b/c and miR-218) concertedly suppressed metastasis-promoting LOXL2 in head and neck squamous cell carcinoma       | Fukumoto, Ichiro; Kikkawa, Naoko; Matsushita, Ryosuke; Kato, Mayuko; Kurozumi, Akira; Nishikawa, Rika; Goto, Yusuke; Koshizuka, Keiichi; Hanazawa, Toyoyuki; Enokida, Hideki; Nakagawa, Masayuki; Okamoto, Yoshitaka; Seki, Naohiko                                                                                       | JOURNAL OF HUMAN GENETICS         | 2016 | 61  | 2 | 31 | 6,2  |

|                                                                                                                     |                                                                                                                                                                                                                              |                                            |      |      |    |    |      |
|---------------------------------------------------------------------------------------------------------------------|------------------------------------------------------------------------------------------------------------------------------------------------------------------------------------------------------------------------------|--------------------------------------------|------|------|----|----|------|
| Virtues and Weaknesses of DNA Methylation as a Test for Cervical Cancer Prevention                                  | Lorincz, Attila T.                                                                                                                                                                                                           | ACTA CYTOLOGICA                            | 2016 | 60   | 6  | 31 | 6,2  |
| Targeting ion channels for cancer therapy by repurposing the approved drugs                                         | Kale, Vijay Pralhad; Amin, Shantu G.; Pandey, Manoj K.                                                                                                                                                                       | BIOCHIMICA ET BIOPHYSICA ACTA-BIOMEMBRANES | 2015 | 1848 | 10 | 31 | 5,17 |
| The Prediction of Radiotherapy Toxicity Using Single Nucleotide Polymorphism-Based Models: A Step Toward Prevention | Kerns, Sarah L.; Kundu, Suman; Oh, Jung Hun; Singhal, Sandeep K.; Janelins, Michelle; Travis, Lois B.; Deasy, Joseph O.; Janssens, A. Cecile J. E.; Ostrer, Harry; Parliament, Matthew; Usmani, Nawaid; Rosenstein, Barry S. | SEMINARS IN RADIATION ONCOLOGY             | 2015 | 25   | 4  | 31 | 5,17 |
| The genomic evolution of human prostate cancer                                                                      | Mitchell, T.; Neal, D. E.                                                                                                                                                                                                    | BRITISH JOURNAL OF CANCER                  | 2015 | 113  | 2  | 31 | 5,17 |
| Prostate cancer epigenetic biomarkers: next-generation technologies                                                 | Valdes-Mora, F.; Clark, S. J.                                                                                                                                                                                                | ONCOGENE                                   | 2015 | 34   | 13 | 31 | 5,17 |

|                                                                                                                         |                                                                                                                                                                                                                                                                                                                                                                                                                                                                                                                                                                                                                                                                                                                                                                                                                                                                                                                                                                                                                                                                                                                                                                                                                                                                                                                                                       |                          |      |    |    |    |      |
|-------------------------------------------------------------------------------------------------------------------------|-------------------------------------------------------------------------------------------------------------------------------------------------------------------------------------------------------------------------------------------------------------------------------------------------------------------------------------------------------------------------------------------------------------------------------------------------------------------------------------------------------------------------------------------------------------------------------------------------------------------------------------------------------------------------------------------------------------------------------------------------------------------------------------------------------------------------------------------------------------------------------------------------------------------------------------------------------------------------------------------------------------------------------------------------------------------------------------------------------------------------------------------------------------------------------------------------------------------------------------------------------------------------------------------------------------------------------------------------------|--------------------------|------|----|----|----|------|
| Fine-mapping of the HNF1B multicancer locus identifies candidate variants that mediate endometrial cancer risk          | Painter, Jodie N.; O'Mara, Tracy A.; Batra, Jyotsna; Cheng, Timothy; Lose, Felicity A.; Dennis, Joe; Michailidou, Kyriaki; Tyrer, Jonathan P.; Ahmed, Shahana; Ferguson, Kaltin; Healey, Catherine S.; Kaufmann, Susanne; Hillman, Kristine M.; Walpole, Carina; Moya, Leire; Pollock, Pamela; Jones, Angela; Howarth, Kimberley; Martin, Lynn; Gorman, Maggie; Hodgson, Shirley; Magdalena Echeverry De Polanco, Ma.; Sans, Monica; Carracedo, Angel; Castellvi-Bel, Sergi; Rojas-Martinez, Augusto; Santos, Erika; Teixeira, Manuel R.; Carvajal-Carmona, Luis; Shu, Xiao-Ou; Long, Jirong; Zheng, Wei; Xiang, Yong-Bing; Montgomery, Grant W.; Webb, Penelope M.; Scott, Rodney J.; McEvoy, Mark; Attia, John; Holliday, Elizabeth; Martin, Nicholas G.; Nyholt, Dale R.; Henders, Anjali K.; Fasching, Peter A.; Hein, Alexander; Beckmann, Matthias W.; Renner, Stefan P.; Doerk, Thilo; Hillemanns, Peter; Duerst, Matthias; Runnebaum, Ingo; Lambrechts, Diether; Coenegrachts, Lieve; Schrauwen, Stefanie; Amant, Frederic; Winterhoff, Boris; Dowdy, Sean C.; Goode, Ellen L.; Teoman, Attila; Salvesen, Helga B.; Trovik, Jone; Njolstad, Tormund S.; Werner, Henrica M. J.; Ashton, Katie; Proietto, Tony; Otton, Geoffrey; Tzortzatos, Gerasimos; Mints, Miriam; Tham, Emma; Hall, Per; Czene, Kamila; Liu, Jianjun; Li, Jingmei; Hopper, | HUMAN MOLECULAR GENETICS | 2015 | 24 | 5  | 31 | 5,17 |
| ER beta-Mediated Alteration of circATP2B1 and miR-204-3p Signaling Promotes Invasion of Clear Cell Renal Cell Carcinoma | Han, Zhenwei; Zhang, Yong; Sun, Yin; Chen, Jiaqi; Chang, Chawnshang; Wang, Xiaolu; Yeh, Shuyuan                                                                                                                                                                                                                                                                                                                                                                                                                                                                                                                                                                                                                                                                                                                                                                                                                                                                                                                                                                                                                                                                                                                                                                                                                                                       | CANCER RESEARCH          | 2018 | 78 | 10 | 30 | 10   |
| Long non-coding RNAs on the stage of cervical cancer (review)                                                           | Dong, Junxue; Su, Manman; Chang, Weiqin; Zhang, Kun; Wu, Shuying; Xu, Tianmin                                                                                                                                                                                                                                                                                                                                                                                                                                                                                                                                                                                                                                                                                                                                                                                                                                                                                                                                                                                                                                                                                                                                                                                                                                                                         | ONCOLOGY REPORTS         | 2017 | 38 | 4  | 30 | 7,5  |

|                                                                                                                                |                                                                                                                                                                                                                                                                                                                                                                                                                                                                                                                                                                                                                           |                                             |      |     |   |    |     |
|--------------------------------------------------------------------------------------------------------------------------------|---------------------------------------------------------------------------------------------------------------------------------------------------------------------------------------------------------------------------------------------------------------------------------------------------------------------------------------------------------------------------------------------------------------------------------------------------------------------------------------------------------------------------------------------------------------------------------------------------------------------------|---------------------------------------------|------|-----|---|----|-----|
| Correlation of B7-H3 with androgen receptor, immune pathways and poor outcome in prostate cancer: an expression-based analysis | Benzon, B.; Zhao, S. G.; Haffner, M. C.; Takhar, M.; Erho, N.; Yousefi, K.; Hurley, P.; Bishop, J. L.; Tosoian, J.; Ghabili, K.; Alshalalfa, M.; Glavaris, S.; Simons, B. W.; Tran, P.; Davicioni, E.; Karnes, R. J.; Boudadi, K.; Antonarakis, E. S.; Schaeffer, E. M.; Drake, C. G.; Feng, F.; Ross, A. E.                                                                                                                                                                                                                                                                                                              | PROSTATE CANCER AND PROSTATIC DISEASES      | 2017 | 20  | 1 | 30 | 7,5 |
| Identifying fusion transcripts using next generation sequencing                                                                | Kumar, Shailesh; Razzaq, Sundus Khalid; Vo, Angie Duy; Gautam, Mamta; Li, Hui                                                                                                                                                                                                                                                                                                                                                                                                                                                                                                                                             | WILEY INTERDISCIPLINARY REVIEWS-RNA         | 2016 | 7   | 6 | 30 | 6   |
| Liquid Biopsy in Lung Cancer A Perspective From Members of the Pulmonary Pathology Society                                     | Sholl, Lynette M.; Aisner, Dara L.; Allen, Timothy Craig; Beasley, Mary Beth; Cagle, Philip T.; Capelozzi, Vera L.; Dacic, Sanja; Hariri, Lida P.; Kerr, Keith M.; Lantuejoul, Sylvie; Mino-Kenudson, Mari; Raparia, Kirtee; Rekhtman, Natasha; Roy-Chowdhuri, Sinchita; Thunnissen, Eric; Tsao, Ming; Vivero, Marina; Yatabe, Yasushi                                                                                                                                                                                                                                                                                    | ARCHIVES OF PATHOLOGY & LABORATORY MEDICINE | 2016 | 140 | 8 | 30 | 6   |
| Six Novel Loci Associated with Circulating VEGF Levels Identified by a Meta-analysis of Genome-Wide Association Studies        | Choi, Seung Hoan; Ruggiero, Daniela; Sorice, Rossella; Song, Ci; Natile, Teresa; Smith, Albert Vernon; Concas, Maria Pina; Traglia, Michela; Barbieri, Caterina; Ndiaye, Ndeye Coumba; Stathopoulou, Maria G.; Lagou, Vasiliki; Maestrale, Giovanni Battista; Sala, Cinzia; Debette, Stephanie; Kovacs, Peter; Lind, Lars; Lamont, John; Fitzgerald, Peter; Toenjes, Anke; Gudnason, Vilmundur; Toniolo, Daniela; Pirastu, Mario; Bellenguez, Celine; Vasan, Ramachandran S.; Ingelsson, Erik; Leutenegger, Anne-Louise; Johnson, Andrew D.; DeStefano, Anita L.; Visvikis-Siest, Sophie; Seshadri, Sudha; Ciullo, Marina | PLOS GENETICS                               | 2016 | 12  | 2 | 30 | 6   |

|                                                                                                                                                                             |                                                                                                                                                                                                                                                                                                                                                                                                                                                                                                                                   |                                 |      |    |    |    |   |
|-----------------------------------------------------------------------------------------------------------------------------------------------------------------------------|-----------------------------------------------------------------------------------------------------------------------------------------------------------------------------------------------------------------------------------------------------------------------------------------------------------------------------------------------------------------------------------------------------------------------------------------------------------------------------------------------------------------------------------|---------------------------------|------|----|----|----|---|
| Getting to know the extracellular vesicle glycome                                                                                                                           | Gerlach, Jared Q.; Griffin, Matthew D.                                                                                                                                                                                                                                                                                                                                                                                                                                                                                            | MOLECULAR BIOSYSTEMS            | 2016 | 12 | 4  | 30 | 6 |
| Therapeutic targeting of replicative immortality                                                                                                                            | Yaswen, Paul; MacKenzie, Karen L.; Keith, W. Nicol; Hentosh, Patricia; Rodier, Francis; Zhu, Jiyue; Firestone, Gary L.; Matheu, Ander; Carnero, Amancio; Bilsland, Alan; Sundin, Tabetha; Honoki, Kanya; Fujii, Hiromasa; Georgakilas, Alexandros G.; Amedei, Amedeo; Amin, Amr; Helferich, Bill; Boosani, Chandra S.; Guha, Gunjan; Ciriolo, Maria Rosa; Chen, Sophie; Mohammed, Sulma I.; Azmi, Asfar S.; Bhakta, Dipita; Halicka, Dorota; Niccolai, Elena; Aquilano, Katia; Ashraf, S. Salman; Newsheen, Somaira; Yang, Xujuan | SEMINARS IN CANCER BIOLOGY      | 2015 | 35 |    | 30 | 5 |
| Aberrant GLI1 Activation in DNA Damage Response, Carcinogenesis and Chemoresistance                                                                                         | Palle, Komaraiah; Mani, Chinnadurai; Tripathi, Kaushlendra; Athar, Mohammad                                                                                                                                                                                                                                                                                                                                                                                                                                                       | CANCERS                         | 2015 | 7  | 4  | 30 | 5 |
| TMPRSS2: ERG blocks neuroendocrine and luminal cell differentiation to maintain prostate cancer proliferation                                                               | Mounir, Z.; Lin, F.; Lin, V. G.; Korn, J. M.; Yu, Y.; Valdez, R.; Aina, O. H.; Buchwalter, G.; Jaffe, A. B.; Korpai, M.; Zhu, P.; Brown, M.; Cardiff, R. D.; Rocnik, J. L.; Yang, Y.; Pagliarini, R.                                                                                                                                                                                                                                                                                                                              | ONCOGENE                        | 2015 | 34 | 29 | 30 | 5 |
| A genetic variant of MDM4 influences regulation by multiple microRNAs in prostate cancer                                                                                    | Stegeman, Shane; Moya, Leire; Selth, Luke A.; Spurdle, Amanda B.; Clements, Judith A.; Batra, Jyotsna                                                                                                                                                                                                                                                                                                                                                                                                                             | ENDOCRINE-RELATED CANCER        | 2015 | 22 | 2  | 30 | 5 |
| Secretome Analysis of an Osteogenic Prostate Tumor Identifies Complex Signaling Networks Mediating Cross-talk of Cancer and Stromal Cells Within the Tumor Microenvironment | Lee, Yu-Chen; Gajdosik, Martina Srajer; Josic, Djuro; Clifton, James G.; Logothetis, Christopher; Yu-Lee, Li-Yuan; Gallick, Gary E.; Maity, Sankar N.; Lin, Sue-Hwa                                                                                                                                                                                                                                                                                                                                                               | MOLECULAR & CELLULAR PROTEOMICS | 2015 | 14 | 3  | 30 | 5 |

|                                                                                                                                                  |                                                                                                                                                                                                                                                                                                                                                                                                                                                                                                                                                                |                                      |      |     |   |    |      |
|--------------------------------------------------------------------------------------------------------------------------------------------------|----------------------------------------------------------------------------------------------------------------------------------------------------------------------------------------------------------------------------------------------------------------------------------------------------------------------------------------------------------------------------------------------------------------------------------------------------------------------------------------------------------------------------------------------------------------|--------------------------------------|------|-----|---|----|------|
| Chromosomal Instability in Cell-Free DNA Is a Serum Biomarker for Prostate Cancer                                                                | Schuetz, Ekkehard; Akbari, Mohammad R.; Beck, Julia; Urnovitz, Howard; Zhang, William W.; Bornemann-Kolatzki, Kirsten; Mitchell, William M.; Nam, Robert K.; Narod, Steven A.                                                                                                                                                                                                                                                                                                                                                                                  | CLINICAL CHEMISTRY                   | 2015 | 61  | 1 | 30 | 5    |
| Genetic insights into the morass of metastatic heterogeneity                                                                                     | Hunter, Kent W.; Amin, Ruhul; Deasy, Sarah; Ngoc-Han Ha; Wakefield, Lalage                                                                                                                                                                                                                                                                                                                                                                                                                                                                                     | NATURE REVIEWS CANCER                | 2018 | 18  | 4 | 29 | 9,67 |
| The post-translational modification, SUMOylation, and cancer (Review)                                                                            | Han, Zhi-Jian; Feng, Yan-Hu; Gu, Bao-Hong; Li, Yu-Min; Chen, Hao                                                                                                                                                                                                                                                                                                                                                                                                                                                                                               | INTERNATIONAL JOURNAL OF ONCOLOGY    | 2018 | 52  | 4 | 29 | 9,67 |
| Genome-scale analysis to identify prognostic markers in patients with early-stage pancreatic ductal adenocarcinoma after pancreaticoduodenectomy | Liao, Xiwen; Huang, Ketuan; Huang, Rui; Liu, Xiaoguang; Han, Chuangye; Yu, Long; Yu, Tingdong; Yang, Chengkun; Wang, Xiangkun; Peng, Tao                                                                                                                                                                                                                                                                                                                                                                                                                       | ONCOTARGETS AND THERAPY              | 2017 | 10  |   | 29 | 7,25 |
| Characters, functions and clinical perspectives of long non-coding RNAs                                                                          | Wu, Ruifang; Su, Yuwen; Wu, Haijing; Dai, Yong; Zhao, Ming; Lu, Qianjin                                                                                                                                                                                                                                                                                                                                                                                                                                                                                        | MOLECULAR GENETICS AND GENOMICS      | 2016 | 291 | 3 | 29 | 5,8  |
| Transcriptomic profiling of urine extracellular vesicles reveals alterations of CDH3 in prostate cancer                                          | Royo, Felix; Zuniga-Garcia, Patricia; Torrano, Veronica; Loizaga, Ana; Sanchez-Mosquera, Pilar; Ugalde-Olano, Aitziber; Gonzalez, Esperanza; Cortazar, Ana R.; Palomo, Laura; Fernandez-Ruiz, Sonia; Lacasa-Viscasillas, Isabel; Berdasco, Maria; Sutherland, James D.; Barrio, Rosa; Zabala-Letona, Amaia; Martin-Martin, Natalia; Arruabarrena-Aristorena, Amaia; Valcarcel-Jimenez, Lorea; Caro-Maldonado, Alfredo; Gonzalez-Tampan, Jorge; Cachi-Fuentes, Guido; Esteller, Manel; Aransay, Ana M.; Unda, Miguel; Falcon-Perez, Juan M.; Carracedo, Arkaitz | ONCOTARGET                           | 2016 | 7   | 6 | 29 | 5,8  |
| The use of the NIS reporter gene for optimizing oncolytic virotherapy                                                                            | Miller, Amber; Russell, Stephen J.                                                                                                                                                                                                                                                                                                                                                                                                                                                                                                                             | EXPERT OPINION ON BIOLOGICAL THERAPY | 2016 | 16  | 1 | 29 | 5,8  |

|                                                                                                                                                         |                                                                                                                                                                                                                                                                                                                                                                                                                                                                    |                                               |      |    |   |    |      |
|---------------------------------------------------------------------------------------------------------------------------------------------------------|--------------------------------------------------------------------------------------------------------------------------------------------------------------------------------------------------------------------------------------------------------------------------------------------------------------------------------------------------------------------------------------------------------------------------------------------------------------------|-----------------------------------------------|------|----|---|----|------|
| A comprehensive analysis of genome-wide association studies to identify prostate cancer susceptibility loci for the Romanian population                 | Radavoi, George Daniel; Pricop, Catalin; Jinga, Viorel; Mates, Dana; Radoi, Viorica Elena; Jinga, Mariana; Ursu, Radu Roan; Bratu, Ovidiu Gabriel; Mischianu, Dan-Liviu Dorel; Iordache, Paul                                                                                                                                                                                                                                                                      | ROMANIAN JOURNAL OF MORPHOLOGY AND EMBRYOLOGY | 2016 | 57 | 2 | 29 | 5,8  |
| METABOLOMICS IN MEDICAL SCIENCES - TRENDS, CHALLENGES AND PERSPECTIVES                                                                                  | Klupczynska, Agnieszka; Dereziński, Paweł; Kokot, Zenon J.                                                                                                                                                                                                                                                                                                                                                                                                         | ACTA POLONIAE PHARMACEUTICA                   | 2015 | 72 | 4 | 29 | 4,83 |
| Theranostic phenomenon: promises and fallacies                                                                                                          | Diamandis, Eleftherios P.                                                                                                                                                                                                                                                                                                                                                                                                                                          | CLINICAL CHEMISTRY AND LABORATORY MEDICINE    | 2015 | 53 | 7 | 29 | 4,83 |
| Heterogeneity of PTEN and ERG expression in prostate cancer on core needle biopsies: implications for cancer risk stratification and biomarker sampling | Shah, Rajal B.; Bentley, James; Jeffery, Zach; DeMarzo, Angelo M.                                                                                                                                                                                                                                                                                                                                                                                                  | HUMAN PATHOLOGY                               | 2015 | 46 | 5 | 29 | 4,83 |
| Novel long non-coding RNAs are specific diagnostic and prognostic markers for prostate cancer                                                           | Bottcher, Rene; Hoogland, A. Marije; Dits, Natasja; Verhoef, Esther I.; Kweldam, Charlotte; Waranecki, Piotr; Bangma, Chris H.; van Leenders, Geert J. L. H.; Jenster, Guido                                                                                                                                                                                                                                                                                       | ONCOTARGET                                    | 2015 | 6  | 6 | 29 | 4,83 |
| Calcium calmodulin dependent kinase kinase 2-a novel therapeutic target for gastric adenocarcinoma                                                      | Subbannayya, Yashwanth; Syed, Nazia; Barbhuiya, Mustafa A.; Raja, Remya; Marimuthu, Arivusudar; Sahasrabuddhe, Nandini; Pinto, Sneha M.; Manda, Srikanth Srinivas; Renuse, Santosh; Manju, H. C.; Zameer, Mohammed Abdul Lateef; Sharma, Jyoti; Brait, Mariana; Srikumar, Kotteazeth; Carlos Roa, Juan; Kumar, M. Vijaya; Kumar, K. V. Veerendra; Prasad, T. S. Keshava; Ramaswamy, Girija; Kumar, Rekha Vijay; Pandey, Akhilesh; Gowda, Harsha; Chatterjee, Aditi | CANCER BIOLOGY & THERAPY                      | 2015 | 16 | 2 | 29 | 4,83 |



|                                                                                                                                                    |                                                                                                                                                                                                                                                                                                                                                                                                     |                                                                      |      |      |   |    |      |
|----------------------------------------------------------------------------------------------------------------------------------------------------|-----------------------------------------------------------------------------------------------------------------------------------------------------------------------------------------------------------------------------------------------------------------------------------------------------------------------------------------------------------------------------------------------------|----------------------------------------------------------------------|------|------|---|----|------|
| Metabolomic profiling for the identification of novel diagnostic markers in prostate cancer                                                        | Lucarelli, Giuseppe; Rutigliano, Monica; Galleggiante, Vanessa; Giglio, Andrea; Palazzo, Silvano; Ferro, Matteo; Simone, Cristiano; Bettocchi, Carlo; Battaglia, Michele; Ditunno, Pasquale                                                                                                                                                                                                         | EXPERT REVIEW OF MOLECULAR DIAGNOSTICS                               | 2015 | 15   | 9 | 29 | 4,83 |
| Proteomic signatures of extracellular vesicles secreted by nonmineralizing and mineralizing human osteoblasts and stimulation of tumor cell growth | Morhayim, Jess; van de Peppel, Jeroen; Demmers, Jeroen A. A.; Kocer, Gulistan; Nigg, Alex L.; van Driel, Marjolein; Chiba, Hideki; van Leeuwen, Johannes P.                                                                                                                                                                                                                                         | FASEB JOURNAL                                                        | 2015 | 29   | 1 | 29 | 4,83 |
| Innovation in metabolomics to improve personalized healthcare                                                                                      | Cacciatore, Stefano; Loda, Massimo                                                                                                                                                                                                                                                                                                                                                                  | COMPANION DIAGNOSTICS: FROM BIOMARKER IDENTIFICATION TO MARKET ENTRY | 2015 | 1346 |   | 29 | 4,83 |
| Progress in epigenetic histone modification analysis by mass spectrometry for clinical investigations                                              | Onder, Ozlem; Sidoli, Simone; Carroll, Martin; Garcia, Benjamin A.                                                                                                                                                                                                                                                                                                                                  | EXPERT REVIEW OF PROTEOMICS                                          | 2015 | 12   | 5 | 29 | 4,83 |
| Phosphatidylserine: A cancer cell targeting biomarker                                                                                              | Sharma, Bhupender; Kanwar, Shamsher S.                                                                                                                                                                                                                                                                                                                                                              | SEMINARS IN CANCER BIOLOGY                                           | 2018 | 52   |   | 28 | 9,33 |
| Comparison Between Adjuvant and Early-Salvage Postprostatectomy Radiotherapy for Prostate Cancer With Adverse Pathological Features                | Hwang, William L.; Tendulkar, Rahul D.; Niemierko, Andrzej; Agrawal, Shree; Stephans, Kevin L.; Spratt, Daniel E.; Hearn, Jason W.; Koontz, Bridget F.; Lee, W. Robert; Michalski, Jeff M.; Pisansky, Thomas M.; Liauw, Stanley L.; Abramowitz, Matthew C.; Pollack, Alan; Moghanaki, Drew; Anscher, Mitchell S.; Den, Robert B.; Zietman, Anthony L.; Stephenson, Andrew J.; Efsthathiou, Jason A. | JAMA ONCOLOGY                                                        | 2018 | 4    | 5 | 28 | 9,33 |

|                                                                                                                                                    |                                                                                                                                                                                                                                                                                                                                                                                                                                           |                          |      |    |    |    |      |
|----------------------------------------------------------------------------------------------------------------------------------------------------|-------------------------------------------------------------------------------------------------------------------------------------------------------------------------------------------------------------------------------------------------------------------------------------------------------------------------------------------------------------------------------------------------------------------------------------------|--------------------------|------|----|----|----|------|
| Resistance to BET Inhibitor Leads to Alternative Therapeutic Vulnerabilities in Castration-Resistant Prostate Cancer                               | Pawar, Aishwarya; Gollavilli, Paradesi Naidu; Wang, Shaomeng; Asangani, Irfan A.                                                                                                                                                                                                                                                                                                                                                          | CELL REPORTS             | 2018 | 22 | 9  | 28 | 9,33 |
| TOP2A and EZH2 Provide Early Detection of an Aggressive Prostate Cancer Subgroup                                                                   | Labbe, David P.; Sweeney, Christopher J.; Brown, Myles; Galbo, Phillip; Rosario, Spencer; Wadosky, Kristine M.; Ku, Sheng-Yu; Sjostrom, Martin; Alshalalfa, Mohammed; Erho, Nicholas; Davicioni, Elai; Karnes, R. Jeffrey; Schaeffer, Edward M.; Jenkins, Robert B.; Den, Robert B.; Ross, Ashley E.; Bowden, Michaela; Huang, Ying; Gray, Kathryn P.; Feng, Felix Y.; Spratt, Daniel E.; Goodrich, David W.; Eng, Kevin H.; Ellis, Leigh | CLINICAL CANCER RESEARCH | 2017 | 23 | 22 | 28 | 7    |
| Impact of Therapy on Genomics and Transcriptomics in High-Risk Prostate Cancer Treated with Neoadjuvant Docetaxel and Androgen Deprivation Therapy | Beltran, Himisha; Wyatt, Alexander W.; Chedgy, Edmund C.; Donoghue, Adam; Annala, Matti; Warner, Evan W.; Beja, Kevin; Sigouros, Michael; Mo, Fan; Fazli, Ladan; Collins, Colin C.; Eastham, James; Morris, Michael; Taplin, Mary-Ellen; Sboner, Andrea; Halabi, Susan; Gleave, Martin E.                                                                                                                                                 | CLINICAL CANCER RESEARCH | 2017 | 23 | 22 | 28 | 7    |
| DNA methylation variations are required for epithelial-to-mesenchymal transition induced by cancer-associated fibroblasts in prostate cancer cells | Pistore, C.; Giannoni, E.; Colangelo, T.; Rizzo, F.; Magnani, E.; Muccillo, L.; Giurato, G.; Mancini, M.; Rizzo, S.; Riccardi, M.; Sahnane, N.; Del Vescovo, V.; Kishore, K.; Mandruzzato, M.; Macchi, F.; Pelizzola, M.; Denti, M. A.; Furlan, D.; Weisz, A.; Colantuoni, V.; Chiarugi, P.; Bonapace, I. M.                                                                                                                              | ONCOGENE                 | 2017 | 36 | 40 | 28 | 7    |
| Targeting multiple pro-apoptotic signaling pathways with curcumin in prostate cancer cells                                                         | Rivera, Mariela; Ramos, Yanilda; Rodriguez-Valentin, Madeline; Lopez-Acevedo, Sheila; Cubano, Luis A.; Zou, Jin; Zhang, Qiang; Wang, Guangdi; Boukli, Nawal M.                                                                                                                                                                                                                                                                            | PLOS ONE                 | 2017 | 12 | 6  | 28 | 7    |

|                                                                                                                                                           |                                                                                                                                                                                                                                          |                                                                                 |      |     |    |    |     |
|-----------------------------------------------------------------------------------------------------------------------------------------------------------|------------------------------------------------------------------------------------------------------------------------------------------------------------------------------------------------------------------------------------------|---------------------------------------------------------------------------------|------|-----|----|----|-----|
| Phosphorylation-induced conformational dynamics in an intrinsically disordered protein and potential role in phenotypic heterogeneity                     | Kulkarni, Prakash; Jolly, Mohit Kumar; Jia, Dongya; Mooney, Steven M.; Bhargava, Ajay; Kagohara, Luciane T.; Chen, Yihong; Hao, Pengyu; He, Yanan; Veltri, Robert W.; Grishaev, Alexander; Weninger, Keith; Levine, Herbert; Orban, John | PROCEEDINGS OF THE NATIONAL ACADEMY OF SCIENCES OF THE UNITED STATES OF AMERICA | 2017 | 114 | 13 | 28 | 7   |
| Defining RNA Small Molecule Affinity Landscapes Enables Design of a Small Molecule Inhibitor of an Oncogenic Noncoding RNA                                | Velagapudi, Sai Pradeep; Luo, Yiling; Tran, Tuan; Haniff, Hafeez S.; Nakai, Yoshio; Fallahi, Mohammad; Martinez, Gustavo J.; Childs-Disney, Jessica L.; Disney, Matthew D.                                                               | ACS CENTRAL SCIENCE                                                             | 2017 | 3   | 3  | 28 | 7   |
| Exosomal proteins as prostate cancer biomarkers in urine: From mass spectrometry discovery to immunoassay-based validation                                | Wang, Ling; Skotland, Tore; Berge, Viktor; Sandvig, Kirsten; Llorente, Alicia                                                                                                                                                            | EUROPEAN JOURNAL OF PHARMACEUTICAL SCIENCES                                     | 2017 | 98  |    | 28 | 7   |
| PD-L1 promoter methylation is a prognostic biomarker for biochemical recurrence-free survival in prostate cancer patients following radical prostatectomy | Gevensleben, Heidrun; Holmes, Emily Eva; Goltz, Diane; Dietrich, Joern; Sailer, Verena; Ellinger, Joerg; Dietrich, Dimo; Kristiansen, Glen                                                                                               | ONCOTARGET                                                                      | 2016 | 7   | 48 | 28 | 5,6 |
| Translational and clinical implications of the genetic landscape of prostate cancer                                                                       | Spratt, Daniel E.; Zumsteg, Zachary S.; Feng, Felix Y.; Tomlins, Scott A.                                                                                                                                                                | NATURE REVIEWS CLINICAL ONCOLOGY                                                | 2016 | 13  | 10 | 28 | 5,6 |
| Proteomics and peptidomics: moving toward precision medicine in urological malignancies                                                                   | Di Meo, Ashley; Pasic, Maria D.; Yousef, George M.                                                                                                                                                                                       | ONCOTARGET                                                                      | 2016 | 7   | 32 | 28 | 5,6 |
| Novel drugs that target the metabolic reprogramming in renal cell cancer                                                                                  | van der Mijn, Johannes C.; Panka, David J.; Geissler, Andrew K.; Verheul, Henk. M.; Mier, James W.                                                                                                                                       | CANCER & METABOLISM                                                             | 2016 | 4   |    | 28 | 5,6 |

|                                                                                                                                                                                                                 |                                                                                                                                                                                    |                                                       |      |      |    |    |      |
|-----------------------------------------------------------------------------------------------------------------------------------------------------------------------------------------------------------------|------------------------------------------------------------------------------------------------------------------------------------------------------------------------------------|-------------------------------------------------------|------|------|----|----|------|
| Direct regulation of LAMP1 by tumor-suppressive microRNA-320a in prostate cancer                                                                                                                                | Okato, Atsushi; Goto, Yusuke; Kurozumi, Akira; Kato, Mayuko; Kojima, Satoko; Matsushita, Ryosuke; Yonemori, Masaya; Miyamoto, Kazutaka; Ichikawa, Tomohiko; Seki, Naohiko          | INTERNATIONAL JOURNAL OF ONCOLOGY                     | 2016 | 49   | 1  | 28 | 5,6  |
| MiR-301a Regulates E-Cadherin Expression and Is Predictive of Prostate Cancer Recurrence                                                                                                                        | Nam, Robert K.; Benatar, Tania; Wallis, Christopher J. D.; Amemiya, Yutaka; Yang, Wenyi; Garbens, Alaina; Naeim, Magda; Sherman, Christopher; Sugar, Linda; Seth, Arun             | PROSTATE                                              | 2016 | 76   | 10 | 28 | 5,6  |
| Promoter methylation of the immune checkpoint receptor PD-1 (PDCD1) is an independent prognostic biomarker for biochemical recurrence-free survival in prostate cancer patients following radical prostatectomy | Goltz, Diane; Gevensleben, Heidrun; Dietrich, Joern; Ellinger, Joerg; Landsberg, Jennifer; Kristiansen, Glen; Dietrich, Dima                                                       | ONCOIMMUNOLOGY                                        | 2016 | 5    | 10 | 28 | 5,6  |
| Cancer stem cells: a potential target for cancer therapy                                                                                                                                                        | Qiu, Hong; Fang, Xiaoguang; Luo, Qi; Ouyang, Gaoliang                                                                                                                              | CELLULAR AND MOLECULAR LIFE SCIENCES                  | 2015 | 72   | 18 | 28 | 4,67 |
| Metabolomic profiling of hormone-dependent cancers: a bird's eye view                                                                                                                                           | Lloyd, Stacy M.; Arnold, James; Sreekumar, Arun                                                                                                                                    | TRENDS IN ENDOCRINOLOGY AND METABOLISM                | 2015 | 26   | 9  | 28 | 4,67 |
| The Deubiquitinating Enzyme USP7 Regulates Androgen Receptor Activity by Modulating Its Binding to Chromatin                                                                                                    | Chen, Shu-Ting; Okada, Maiko; Nakato, Ryuichiro; Izumi, Kosuke; Bando, Masashige; Shirahige, Katsuhiko                                                                             | JOURNAL OF BIOLOGICAL CHEMISTRY                       | 2015 | 290  | 35 | 28 | 4,67 |
| Toward an integrated pipeline for protein biomarker development                                                                                                                                                 | Drabovich, Andrei P.; Martinez-Morillo, Eduardo; Diamandis, Eleftherios P.                                                                                                         | BIOCHIMICA ET BIOPHYSICA ACTA-PROTEINS AND PROTEOMICS | 2015 | 1854 | 6  | 28 | 4,67 |
| MiR-187 Targets the Androgen-Regulated Gene ALDH1A3 in Prostate Cancer                                                                                                                                          | Casanova-Salas, Irene; Masia, Esther; Arminan, Ana; Calatrava, Ana; Mancarella, Caterina; Rubio-Briones, Jose; Scotlandi, Katia; Vicent, Maria Jesus; Lopez-Guerrero, Jose Antonio | PLOS ONE                                              | 2015 | 10   | 5  | 28 | 4,67 |

|                                                                                                                    |                                                                                                                                                                                                                                                                                     |                       |      |    |   |    |      |
|--------------------------------------------------------------------------------------------------------------------|-------------------------------------------------------------------------------------------------------------------------------------------------------------------------------------------------------------------------------------------------------------------------------------|-----------------------|------|----|---|----|------|
| A Novel Urinary Long Non-Coding RNA Transcript Improves Diagnostic Accuracy in Patients Undergoing Prostate Biopsy | Zhang, Wei; Ren, Shan-Cheng; Shi, Xiao-Lei; Liu, Ya-wei; Zhu, Ya-Sheng; Jing, Tai-Le; Wang, Fu-Bo; Chen, Rui; Xu, Chuan-Liang; Wang, Hui-Qing; Wang, Hai-Feng; Wang, Yan; Liu, Bing; Li, Yao-Ming; Fang, Zi-Yu; Guo, Fei; Lu, Xin; Shen, Dan; Gao, Xu; Hou, Jian-Guo; Sun, Ying-Hao | PROSTATE              | 2015 | 75 | 6 | 28 | 4,67 |
| Label-free quantitative proteomic analysis reveals potential biomarkers and pathways in renal cell carcinoma       | Zhao, Zuohui; Wu, Fei; Ding, Sentai; Sun, Liang; Liu, Zhao; Ding, Kejia; Lu, Jiaju                                                                                                                                                                                                  | TUMOR BIOLOGY         | 2015 | 36 | 2 | 28 | 4,67 |
| IRE1 alpha-XBP1s pathway promotes prostate cancer by activating c-MYC signaling                                    | Sheng, Xia; Nenseth, Hatice Zeynep; Qu, Su; Kuzu, Omer F.; Frahnw, Turid; Simon, Lukas; Greene, Stephanie; Zeng, Qingping; Fazli, Ladan; Rennie, Paul S.; Mills, Ian G.; Danielsen, Havard; Theis, Fabian; Patterson, John B.; Jin, Yang; Saatcioglu, Fahri                         | NATURE COMMUNICATIONS | 2019 | 10 |   | 27 | 13,5 |

|                                                                                                                                                                    |                                                                                                                                                                                                                                                                                                                                                                                                                                                                                                                                                                                                                                                                                                                                                                                                                                                                                                                                                                           |                                             |      |     |    |    |   |
|--------------------------------------------------------------------------------------------------------------------------------------------------------------------|---------------------------------------------------------------------------------------------------------------------------------------------------------------------------------------------------------------------------------------------------------------------------------------------------------------------------------------------------------------------------------------------------------------------------------------------------------------------------------------------------------------------------------------------------------------------------------------------------------------------------------------------------------------------------------------------------------------------------------------------------------------------------------------------------------------------------------------------------------------------------------------------------------------------------------------------------------------------------|---------------------------------------------|------|-----|----|----|---|
| Immunogenomic analyses associate immunological alterations with mismatch repair defects in prostate cancer                                                         | Rodrigues, Daniel Nava; Rescigno, Pasquale; Liu, David; Yuan, Wei; Carreira, Suzanne; Lambros, Maryou B.; Seed, George; Mateo, Joaquin; Riisnaes, Ruth; Mullane, Stephanie; Margolis, Claire; Miao, Diana; Miranda, Susana; Dolling, David; Clarke, Matthew; Bertan, Claudia; Crespo, Mateus; Boysen, Gunther; Ferreira, Ana; Sharp, Adam; Figueiredo, Ines; Keliher, Daniel; Aldubayan, Saud; Burke, Kelly P.; Sumanasuriya, Semini; Fontes, Mariane Sousa; Bianchini, Diletta; Zafeiriou, Zafeiris; Mendes, Larissa Sena Teixeira; Mouw, Kent; Schweizer, Michael T.; Pritchard, Colin C.; Salipante, Stephen; Taplin, Mary- Ellen; Beltran, Himisha; Rubin, Mark A.; Cieslik, Marcin; Robinson, Dan; Heath, Elizabeth; Schultz, Nikolaus; Armenia, Joshua; Abida, Wassim; Scher, Howard; Lord, Christopher; D'Andrea, Alan; Sawyers, Charles L.; Chinnaiyan, Arul M.; Alimonti, Andrea; Nelson, Peter S.; Drake, Charles G.; Van Allen, Eliezer M.; de Bono, Johann S. | JOURNAL OF CLINICAL INVESTIGATION           | 2018 | 128 | 10 | 27 | 9 |
| Aptamer-based targeted therapy                                                                                                                                     | Zhu, Guizhi; Chen, Xiaoyuan                                                                                                                                                                                                                                                                                                                                                                                                                                                                                                                                                                                                                                                                                                                                                                                                                                                                                                                                               | ADVANCED DRUG DELIVERY REVIEWS              | 2018 | 134 |    | 27 | 9 |
| Multi-layered prevention and treatment of chronic inflammation, organ fibrosis and cancer associated with canonical WNT/beta-catenin signaling activation (Review) | Kato, Masaru                                                                                                                                                                                                                                                                                                                                                                                                                                                                                                                                                                                                                                                                                                                                                                                                                                                                                                                                                              | INTERNATIONAL JOURNAL OF MOLECULAR MEDICINE | 2018 | 42  | 2  | 27 | 9 |
| Dancing with the DNA damage response: next-generation anti-cancer therapeutic strategies                                                                           | Minchom, Anna; Aversa, Caterina; Lopez, Juanita                                                                                                                                                                                                                                                                                                                                                                                                                                                                                                                                                                                                                                                                                                                                                                                                                                                                                                                           | THERAPEUTIC ADVANCES IN MEDICAL ONCOLOGY    | 2018 | 10  |    | 27 | 9 |

|                                                                                                                        |                                                                                                                                                                                                                                                                                                                                                            |                                      |      |     |     |    |      |
|------------------------------------------------------------------------------------------------------------------------|------------------------------------------------------------------------------------------------------------------------------------------------------------------------------------------------------------------------------------------------------------------------------------------------------------------------------------------------------------|--------------------------------------|------|-----|-----|----|------|
| Revisiting the role of Wnt/beta-catenin signaling in prostate cancer                                                   | Schneider, Jeffrey A.; Logan, Susan K.                                                                                                                                                                                                                                                                                                                     | MOLECULAR AND CELLULAR ENDOCRINOLOGY | 2018 | 462 |     | 27 | 9    |
| Identifying DNA methylation biomarkers for non-endoscopic detection of Barrett's esophagus                             | Moinova, Helen R.; LaFramboise, Thomas; Lutterbaugh, James D.; Chandar, Apoorva Krishna; Dumot, John; Faulx, Ashley; Brock, Wendy; Cabrera, Omar De la Cruz; Guda, Kishore; Barnholtz-Sloan, Jill S.; Iyer, Prasad G.; Canto, Marcia I.; Wang, Jean S.; Shaheen, Nicholas J.; Thota, Prashanti N.; Willis, Joseph E.; Chak, Amitabh; Markowitz, Sanford D. | SCIENCE TRANSLATIONAL MEDICINE       | 2018 | 10  | 424 | 27 | 9    |
| Somatic Superenhancer Duplications and Hotspot Mutations Lead to Oncogenic Activation of the KLF5 Transcription Factor | Zhang, Xiaoyang; Choi, Peter S.; Francis, Joshua M.; Gao, Galen F.; Campbell, Joshua D.; Ramachandran, Aruna; Mitsuishi, Yoichiro; Ha, Gavin; Shih, Juliann; Vazquez, Francisca; Tsherniak, Aviad; Taylor, Alison M.; Zhou, Jin; Wu, Zhong; Berger, Ashton C.; Giannakis, Marios; Hahn, William C.; Cherniack, Andrew D.; Meyerson, Matthew                | CANCER DISCOVERY                     | 2018 | 8   | 1   | 27 | 9    |
| Precision medicine based on epigenomics: the paradigm of carcinoma of unknown primary                                  | Moran, Sebastian; Martinez-Cardus, Anna; Boussios, Stergios; Esteller, Manel                                                                                                                                                                                                                                                                               | NATURE REVIEWS CLINICAL ONCOLOGY     | 2017 | 14  | 11  | 27 | 6,75 |
| A Pyrrole-Imidazole Polyamide Is Active against Enzalutamide-Resistant Prostate Cancer                                 | Kurmis, Alexis A.; Yang, Fei; Welch, Timothy R.; Nickols, Nicholas G.; Dervan, Peter B.                                                                                                                                                                                                                                                                    | CANCER RESEARCH                      | 2017 | 77  | 9   | 27 | 6,75 |
| Prostate cancer proteomics: Current trends and future perspectives for biomarker discovery                             | Tanase, Cristiana Pistol; Codrici, Elena; Popescu, Ionela Daniela; Mihai, Simona; Enciu, Ana-Maria; Necula, Laura Georgiana; Preda, Adrian; Ismail, Gener; Albulescu, Radu                                                                                                                                                                                 | ONCOTARGET                           | 2017 | 8   | 11  | 27 | 6,75 |

|                                                                                                                                                                      |                                                                                                                                                                                                                                                                                                                                                                                                               |                                           |      |      |    |    |      |
|----------------------------------------------------------------------------------------------------------------------------------------------------------------------|---------------------------------------------------------------------------------------------------------------------------------------------------------------------------------------------------------------------------------------------------------------------------------------------------------------------------------------------------------------------------------------------------------------|-------------------------------------------|------|------|----|----|------|
| Oxidative Stress Gene Expression Profile Correlates with Cancer Patient Poor Prognosis: Identification of Crucial Pathways Might Select Novel Therapeutic Approaches | Leone, Alessandra; Roca, Maria Serena; Ciardiello, Chiara; Costantini, Susan; Budillon, Alfredo                                                                                                                                                                                                                                                                                                               | OXIDATIVE MEDICINE AND CELLULAR LONGEVITY | 2017 | 2017 |    | 27 | 6,75 |
| Extracellular Vesicles in Renal Pathophysiology                                                                                                                      | Pomatto, Margherita A. C.; Gai, Chiara; Bussolati, Benedetta; Camussi, Giovanni                                                                                                                                                                                                                                                                                                                               | FRONTIERS IN MOLECULAR BIOSCIENCES        | 2017 | 4    |    | 27 | 6,75 |
| Regulation of TPD52 by antitumor microRNA-218 suppresses cancer cell migration and invasion in lung squamous cell carcinoma                                          | Kumamoto, Tomohiro; Seki, Naohiko; Mataka, Hiroko; Mizuno, Keiko; Kamikawaji, Kazuto; Samukawa, Takuya; Koshizuka, Keiichi; Goto, Yusuke; Inoue, Hiromasa                                                                                                                                                                                                                                                     | INTERNATIONAL JOURNAL OF ONCOLOGY         | 2016 | 49   | 5  | 27 | 5,4  |
| Methylation analyses in liquid biopsy                                                                                                                                | Lissa, Delphine; Robles, Ana I.                                                                                                                                                                                                                                                                                                                                                                               | TRANSLATIONAL LUNG CANCER RESEARCH        | 2016 | 5    | 5  | 27 | 5,4  |
| A cancer specific hypermethylation signature of the TERT promoter predicts biochemical relapse in prostate cancer: A retrospective cohort study                      | Castelo-Branco, Pedro; Leao, Ricardo; Lipman, Tatiana; Campbell, Brittany; Lee, Donghyun; Price, Aryeh; Zhang, Cindy; Heidari, Abolfazl; Stephens, Derek; Boerno, Stefan; Coelho, Hugo; Gomes, Ana; Domingos, Celia; Apolonio, Joana D.; Schaefer, Georg; Bristow, Robert G.; Schweiger, Michal R.; Hamilton, Robert; Zlotta, Alexandre; Figueiredo, Arnaldo; Klocker, Helmut; Sueltmann, Holger; Tabori, Uri | ONCOTARGET                                | 2016 | 7    | 36 | 27 | 5,4  |
| The role of glycans in the development and progression of prostate cancer                                                                                            | Munkley, Jennifer; Mills, Ian G.; Elliott, David J.                                                                                                                                                                                                                                                                                                                                                           | NATURE REVIEWS UROLOGY                    | 2016 | 13   | 6  | 27 | 5,4  |
| The importance of non-nuclear AR signaling in prostate cancer progression and therapeutic resistance                                                                 | Zarif, Jelani C.; Miranti, Cindy K.                                                                                                                                                                                                                                                                                                                                                                           | CELLULAR SIGNALLING                       | 2016 | 28   | 5  | 27 | 5,4  |



|                                                                                                                                           |                                                                                                                                                                                                                                                                                                                                            |                                   |      |     |    |    |     |
|-------------------------------------------------------------------------------------------------------------------------------------------|--------------------------------------------------------------------------------------------------------------------------------------------------------------------------------------------------------------------------------------------------------------------------------------------------------------------------------------------|-----------------------------------|------|-----|----|----|-----|
| Regulation of androgen receptor splice variant AR3 by PCGEM1                                                                              | Zhang, Ziqiang; Zhou, Nanjiang; Huang, Jianguo; Ho, Tsui-Ting; Zhu, Zhuxian; Qiu, Zhongmin; Zhou, Xinchun; Bai, Chunxue; Wu, Fangting; Xu, Min; Mo, Yin-Yuan                                                                                                                                                                               | ONCOTARGET                        | 2016 | 7   | 13 | 27 | 5,4 |
| Long Noncoding RNA RGMB-AS1 Indicates a Poor Prognosis and Modulates Cell Proliferation, Migration and Invasion in Lung Adenocarcinoma    | Li, Ping; Zhang, Guojun; Li, Juan; Yang, Rui; Chen, Shanshan; Wu, Shujun; Zhang, Furui; Bai, Yong; Zhao, Huasi; Wang, Yuanyuan; Dun, Shaozhi; Chen, Xiaonan; Sun, Qianqian; Zhao, Guoqiang                                                                                                                                                 | PLOS ONE                          | 2016 | 11  | 3  | 27 | 5,4 |
| DNA methylome changes by estradiol benzoate and bisphenol A links early-life environmental exposures to prostate cancer risk              | Cheong, Ana; Zhang, Xiang; Cheung, Yuk-Yin; Tang, Wan-yee; Chen, Jing; Ye, Shu-Hua; Medvedovic, Mario; Leung, Yuet-Kin; Prins, Gail S.; Ho, Shuk-Mei                                                                                                                                                                                       | EPIGENETICS                       | 2016 | 11  | 9  | 27 | 5,4 |
| Proteomics analysis of vesicles isolated from plasma and urine of prostate cancer patients using a multiplex, aptamer-based protein array | Welton, Joanne Louise; Brennan, Paul; Gurney, Mark; Webber, Jason Paul; Spary, Lisa Kate; Carton, David Gil; Falcon-Perez, Juan Manuel; Walton, Sean Peter; Mason, Malcolm David; Tabi, Zsuzsanna; Clayton, Aled                                                                                                                           | JOURNAL OF EXTRACELLULAR VESICLES | 2016 | 5   |    | 27 | 5,4 |
| Epigenetic dysregulation of K(Ca)3.1 channels induces poor prognosis in lung cancer                                                       | Bulk, Etmar; Ay, Anne-Sophie; Hammadi, Mehdi; Ouadid-Ahidouch, Halima; Schelhaas, Sonja; Hascher, Antje; Rohde, Christian; Thoennissen, Nils H.; Wiewrodt, Rainer; Schmidt, Eva; Marra, Alessandro; Hillejan, Ludger; Jacobs, Andreas H.; Klein, Hans-Ulrich; Dugas, Martin; Berdel, Wolfgang E.; Mueller-Tidow, Carsten; Schwab, Albrecht | INTERNATIONAL JOURNAL OF CANCER   | 2015 | 137 | 6  | 27 | 4,5 |

|                                                                                                                                                                           |                                                                                                                                                                                                                                                                                                                                    |                  |      |    |    |    |     |
|---------------------------------------------------------------------------------------------------------------------------------------------------------------------------|------------------------------------------------------------------------------------------------------------------------------------------------------------------------------------------------------------------------------------------------------------------------------------------------------------------------------------|------------------|------|----|----|----|-----|
| Plasma genetic and genomic abnormalities predict treatment response and clinical outcome in advanced prostate cancer                                                      | Xia, Shu; Kohli, Manish; Du, Meijun; Dittmar, Rachel L.; Lee, Adam; Nandy, Debashis; Yuan, Tiezheng; Guo, Yongchen; Wang, Yuan; Tschannen, Michael R.; Worthey, Elizabeth; Jacob, Howard; See, William; Kilari, Deepak; Wang, Xuexia; Hovey, Raymond L.; Huang, Chiang-Ching; Wang, Liang                                          | ONCOTARGET       | 2015 | 6  | 18 | 27 | 4,5 |
| Precise quantitation of 136 urinary proteins by LC/MRM-MS using stable isotope labeled peptides as internal standards for biomarker discovery and/or verification studies | Percy, Andrew J.; Yang, Juncong; Hardie, Darryl B.; Chambers, Andrew G.; Tamura-Wells, Jessica; Borchers, Christoph H.                                                                                                                                                                                                             | METHODS          | 2015 | 81 |    | 27 | 4,5 |
| Discovery and characterization of long intergenic non-coding RNAs (lincRNA) module biomarkers in prostate cancer: an integrative analysis of RNA-Seq data                 | Cui, Weirong; Qian, Yulan; Zhou, Xiaoke; Lin, Yuxin; Jiang, Junfeng; Chen, Jiajia; Zhao, Zhongming; Shen, Bairong                                                                                                                                                                                                                  | BMC GENOMICS     | 2015 | 16 |    | 27 | 4,5 |
| Circulating Tumor DNA Abundance and Potential Utility in De Novo Metastatic Prostate Cancer                                                                               | Vandekerkhove, Gillian; Struss, Werner J.; Annala, Matti; Kallio, Heini M. L.; Khalaf, Daniel; Warner, Evan W.; Herberts, Cameron; Ritch, Elie; Beja, Kevin; Loktionova, Yulia; Hurtado-Coll, Antonio; Fazli, Ladan; So, Alan; Black, Peter C.; Nykter, Matti; Tammela, Teuvo; Chi, Kim N.; Gleave, Martin E.; Wyatt, Alexander W. | EUROPEAN UROLOGY | 2019 | 75 | 4  | 26 | 13  |

|                                                                                                                                                       |                                                                                                                                                                                                                                                                                                                                                                                                                                                                                                                                                                                                                                                                |                                                                                         |      |      |    |    |      |
|-------------------------------------------------------------------------------------------------------------------------------------------------------|----------------------------------------------------------------------------------------------------------------------------------------------------------------------------------------------------------------------------------------------------------------------------------------------------------------------------------------------------------------------------------------------------------------------------------------------------------------------------------------------------------------------------------------------------------------------------------------------------------------------------------------------------------------|-----------------------------------------------------------------------------------------|------|------|----|----|------|
| TP53 Outperforms Other Androgen Receptor Biomarkers to Predict Abiraterone or Enzalutamide Outcome in Metastatic Castration-Resistant Prostate Cancer | De Laere, Bram; Oeyen, Steffi; Mayrhofer, Markus; Whittington, Tom; van Dam, Pieter-Jan; Van Oyen, Peter; Ghysel, Christophe; Ampe, Jozef; Ost, Piet; Demey, Wim; Hoekx, Lucien; Schrijvers, Dirk; Brouwers, Barbara; Lybaert, Willem; Everaert, Els G.; De Maeseneer, Daan; Strijbos, Michiel; Bols, Alain; Fransis, Karen; Beije, Nick; de Kruijff, Inge E.; van Dam, Valerie; Brouwer, Anja; Goossens, Dirk; Heyrman, Lien; Van den Eynden, Gert G.; Rutten, Annemie; Del Favero, Jurgen; Rantalainen, Mattias; Rajan, Prabhakar; Sleijfer, Stefan; Ullen, Anders; Yachnin, Jeffrey; Gronberg, Henrik; Van Laere, Steven J.; Lindberg, Johan; Dirix, Luc Y. | CLINICAL CANCER RESEARCH                                                                | 2019 | 25   | 6  | 26 | 13   |
| Cell metabolomics identify regulatory pathways and targets of magnoline against prostate cancer                                                       | Sun, Hui; Zhang, Ai-hua; Liu, Shao-bo; Qiu, Shi; Li, Xian-na; Zhang, Tian-lei; Liu, Liang; Wang, Xi-jun                                                                                                                                                                                                                                                                                                                                                                                                                                                                                                                                                        | JOURNAL OF CHROMATOGRAPHY B-ANALYTICAL TECHNOLOGIES IN THE BIOMEDICAL AND LIFE SCIENCES | 2018 | 1102 |    | 26 | 8,67 |
| Aberrant RNA Splicing in Cancer and Drug Resistance                                                                                                   | Wang, Bi-Dar; Lee, Norman H.                                                                                                                                                                                                                                                                                                                                                                                                                                                                                                                                                                                                                                   | CANCERS                                                                                 | 2018 | 10   | 11 | 26 | 8,67 |
| Clinical and Genomic Characterization of Low-Prostate-specific Antigen, High-grade Prostate Cancer                                                    | Mahal, Brandon A.; Yang, David D.; Wang, Natalie Q.; Alshalalfa, Mohammed; Davicioni, Elai; Choeurng, Voleak; Schaeffer, Edward M.; Ross, Ashley E.; Spratt, Daniel E.; Den, Robert B.; Martin, Neil E.; Mouw, Kent W.; Orio, Peter F., III; Choueiri, Toni K.; Taplin, Mary-Ellen; Quoc-Dien Trinh; Feng, Felix Y.; Nguyen, Paul L.                                                                                                                                                                                                                                                                                                                           | EUROPEAN UROLOGY                                                                        | 2018 | 74   | 2  | 26 | 8,67 |

|                                                                                                               |                                                                                                                                                                                                                                                                                                                                                                                                                                                                                                                  |                                             |      |    |    |    |      |
|---------------------------------------------------------------------------------------------------------------|------------------------------------------------------------------------------------------------------------------------------------------------------------------------------------------------------------------------------------------------------------------------------------------------------------------------------------------------------------------------------------------------------------------------------------------------------------------------------------------------------------------|---------------------------------------------|------|----|----|----|------|
| Enduring epigenetic landmarks define the cancer microenvironment                                              | Pidsley, Ruth; Lawrence, Mitchell G.; Zotenko, Elena; Niranjana, Birunthi; Statham, Aaron; Song, Jenny; Chabanon, Roman M.; Qu, Wenjia; Wang, Hong; Richards, Michelle; Nair, Shalima S.; Armstrong, Nicola J.; Nim, Hieu T.; Papargiris, Melissa; Balanathan, Preetika; French, Hugh; Peters, Timothy; Norden, Sam; Ryan, Andrew; Pedersen, John; Kench, James; Daly, Roger J.; Horvath, Lisa G.; Stricker, Phillip; Frydenberg, Mark; Taylor, Renea A.; Stirzaker, Clare; Risbridger, Gail P.; Clark, Susan J. | GENOME RESEARCH                             | 2018 | 28 | 5  | 26 | 8,67 |
| A RNA-Sequencing approach for the identification of novel long non-coding RNA biomarkers in colorectal cancer | Yamada, Atsushi; Yu, Pingjian; Lin, Wei; Okugawa, Yoshinaga; Boland, C. Richard; Goel, Ajay                                                                                                                                                                                                                                                                                                                                                                                                                      | SCIENTIFIC REPORTS                          | 2018 | 8  |    | 26 | 8,67 |
| Prognostic and predictive biomarkers in prostate cancer: latest evidence and clinical implications            | Terada, Naoki; Akamatsu, Shusuke; Kobayashi, Takashi; Inoue, Takahiro; Ogawa, Osamu; Antonarakis, Emmanuel S.                                                                                                                                                                                                                                                                                                                                                                                                    | THERAPEUTIC ADVANCES IN MEDICAL ONCOLOGY    | 2017 | 9  | 8  | 26 | 6,5  |
| Development and Validation of a Three-gene Prognostic Signature for Patients with Hepatocellular Carcinoma    | Li, Binghua; Feng, Wendu; Luo, Ouyang; Xu, Tiancheng; Cao, Yajuan; Wu, Hongyan; Yu, Decai; Ding, Yitao                                                                                                                                                                                                                                                                                                                                                                                                           | SCIENTIFIC REPORTS                          | 2017 | 7  |    | 26 | 6,5  |
| The ovarian cancer oncobiome                                                                                  | Banerjee, Sagarika; Tian, Tian; Wei, Zhi; Shih, Natalie; Feldman, Michael D.; Alwine, James C.; Coukos, George; Robertson, Erle S.                                                                                                                                                                                                                                                                                                                                                                               | ONCOTARGET                                  | 2017 | 8  | 22 | 26 | 6,5  |
| Extracellular vesicles as a source for non-invasive biomarkers in bladder cancer progression                  | Andreu, Zoraida; Otta Oshiro, Renan; Redruello, Alberto; Lopez-Martin, Soraya; Gutierrez-Vazquez, Cristina; Morato, Esperanza; Isabel Marina, Ana; Olivier Gomez, Carlos; Yanez-Mo, Maria                                                                                                                                                                                                                                                                                                                        | EUROPEAN JOURNAL OF PHARMACEUTICAL SCIENCES | 2017 | 98 |    | 26 | 6,5  |

|                                                                                                                                        |                                                                                                                |                    |      |    |    |    |     |
|----------------------------------------------------------------------------------------------------------------------------------------|----------------------------------------------------------------------------------------------------------------|--------------------|------|----|----|----|-----|
| Sequential pathogenesis of metastatic VHL mutant clear cell renal cell carcinoma: putting it together with a translational perspective | Shenoy, N.; Pagliaro, L.                                                                                       | ANNALS OF ONCOLOGY | 2016 | 27 | 9  | 26 | 5,2 |
| Evaluation and consequences of heterogeneity in the circulating tumor cell compartment                                                 | Brouwer, Anja; De laere, Bram; Peeters, Dieter; Peeters, Marc; Salgado, Roberto; Dirix, Luc; Van Laere, Steven | ONCOTARGET         | 2016 | 7  | 30 | 26 | 5,2 |
| BET bromodomain-mediated interaction between ERG and BRD4 promotes prostate cancer cell invasion                                       | Blee, Alexandra M.; Liu, Shujun; Wang, Liguu; Huang, Haojie                                                    | ONCOTARGET         | 2016 | 7  | 25 | 26 | 5,2 |

|                                                                                                                                                      |                                                                                                                                                                                                                                                                                                                                                                                                                                                                                                                                                                                                                                                                                                                                                                                                                                                                                                                                                                                                                                                                                                                                                                                                                                                                                                                                                         |                          |      |    |    |    |      |
|------------------------------------------------------------------------------------------------------------------------------------------------------|---------------------------------------------------------------------------------------------------------------------------------------------------------------------------------------------------------------------------------------------------------------------------------------------------------------------------------------------------------------------------------------------------------------------------------------------------------------------------------------------------------------------------------------------------------------------------------------------------------------------------------------------------------------------------------------------------------------------------------------------------------------------------------------------------------------------------------------------------------------------------------------------------------------------------------------------------------------------------------------------------------------------------------------------------------------------------------------------------------------------------------------------------------------------------------------------------------------------------------------------------------------------------------------------------------------------------------------------------------|--------------------------|------|----|----|----|------|
| Integration of multiethnic fine-mapping and genomic annotation to prioritize candidate functional SNPs at prostate cancer susceptibility regions     | Han, Ying; Hazelett, Dennis J.; Wiklund, Fredrik; Schumacher, Fredrick R.; Stram, Daniel O.; Berndt, Sonja I.; Wang, Zhaoming; Rand, Kristin A.; Hoover, Robert N.; Machiela, Mitchell J.; Yeager, Merideth; Burdette, Laurie; Chung, Charles C.; Hutchinson, Amy; Yu, Kai; Xu, Jianfeng; Travis, Ruth C.; Key, Timothy J.; Siddiq, Afshan; Canzian, Federico; Takahashi, Atsushi; Kubo, Michiaki; Stanford, Janet L.; Kolb, Suzanne; Gapstur, Susan M.; Diver, W. Ryan; Stevens, Victoria L.; Strom, Sara S.; Pettaway, Curtis A.; Al Olama, Ali Amin; Kote-Jarai, Zsofia; Eeles, Rosalind A.; Yeboah, Edward D.; Tettey, Yao; Biritwum, Richard B.; Adjei, Andrew A.; Tay, Evelyn; Truelove, Ann; Niwa, Shelley; Chokkalingam, Anand P.; Isaacs, William B.; Chen, Constance; Lindstrom, Sara; Le Marchand, Loic; Giovannucci, Edward L.; Pomerantz, Mark; Long, Henry; Li, Fugen; Ma, Jing; Stampfer, Meir; John, Esther M.; Ingles, Sue A.; Kittles, Rick A.; Murphy, Adam B.; Blot, William J.; Signorello, Lisa B.; Zheng, Wei; Albanes, Demetrius; Virtamo, Jarmo; Weinstein, Stephanie; Nemesure, Barbara; Carpten, John; Leske, M. Cristina; Wu, Suh-Yuh; Hennis, Anselm J. M.; Rybicki, Benjamin A.; Neslund-Dudas, Christine; Hsing, Ann W.; Chu, Lisa; Goodman, Phyllis J.; Klein, Eric A.; Zheng, S. Lilly; Witte, John S.; Casey, Graham; | HUMAN MOLECULAR GENETICS | 2015 | 24 | 19 | 26 | 4,33 |
| An integrated genome-wide approach to discover deregulated microRNAs in non-small cell lung cancer: Clinical significance of miR-23b-3p deregulation | Begum, Shahnaz; Hayashi, Masamichi; Ogawa, Takenori; Jabboure, Fayez J.; Brait, Mariana; Izumchenko, Evgeny; Tabak, Sarit; Ahrendt, Steven A.; Westra, William H.; Koch, Wayne; Sidransky, David; Hoque, Mohammad O.                                                                                                                                                                                                                                                                                                                                                                                                                                                                                                                                                                                                                                                                                                                                                                                                                                                                                                                                                                                                                                                                                                                                    | SCIENTIFIC REPORTS       | 2015 | 5  |    | 26 | 4,33 |

|                                                                                                                                                                |                                                                                                                                                                                                                                                                                                                                                                                                                                                                                          |                               |      |      |   |    |      |
|----------------------------------------------------------------------------------------------------------------------------------------------------------------|------------------------------------------------------------------------------------------------------------------------------------------------------------------------------------------------------------------------------------------------------------------------------------------------------------------------------------------------------------------------------------------------------------------------------------------------------------------------------------------|-------------------------------|------|------|---|----|------|
| Androgen receptor non-nuclear regulation of prostate cancer cell invasion mediated by Src and matriptase                                                       | Zarif, Jelani C.; Lamb, Laura E.; Schulz, Veronique V.; Nollet, Eric A.; Miranti, Cindy K.                                                                                                                                                                                                                                                                                                                                                                                               | ONCOTARGET                    | 2015 | 6    | 9 | 26 | 4,33 |
| The histone chaperone HJURP is a new independent prognostic marker for luminal A breast carcinoma                                                              | de Oca, Rocio Montes; Gurard-Levin, Zachary A.; Berger, Frederique; Rehman, Haniya; Martel, Elise; Corpet, Armelle; de Koning, Leanne; Vassias, Isabelle; Wilson, Laurence O. W.; Meseure, Didier; Rey, Fabien; Savignoni, Alexia; Asselain, Bernard; Sastre-Garau, Xavier; Almouzni, Genevieve                                                                                                                                                                                          | MOLECULAR ONCOLOGY            | 2015 | 9    | 3 | 26 | 4,33 |
| Cracking the Code of Human Diseases Using Next-Generation Sequencing: Applications, Challenges, and Perspectives                                               | Precone, Vincenza; Del Monaco, Valentina; Esposito, Maria Valeria; De Palma, Fatima Domenica Elisa; Ruocco, Anna; Salvatore, Francesco; D'Argenio, Valeria                                                                                                                                                                                                                                                                                                                               | BIOMED RESEARCH INTERNATIONAL | 2015 | 2015 |   | 26 | 4,33 |
| A Phase II Trial of the Aurora Kinase A Inhibitor Alisertib for Patients with Castration-resistant and Neuroendocrine Prostate Cancer: Efficacy and Biomarkers | Beltran, Himisha; Oromendia, Clara; Danila, Daniel C.; Montgomery, Bruce; Hoimes, Christopher; Szmulewitz, Russell Z.; Vaishampayan, Ulka; Armstrong, Andrew J.; Stein, Mark; Pinski, Jacek; Mosquera, Juan M.; Sailer, Verena; Bareja, Rohan; Romanel, Alessandro; Gumpeni, Naveen; Sboner, Andrea; Dardenne, Etienne; Puca, Loredana; Prandi, Davide; Rubin, Mark A.; Scher, Howard I.; Rickman, David S.; Demichelis, Francesca; Nanus, David M.; Ballman, Karla V.; Tagawa, Scott T. | CLINICAL CANCER RESEARCH      | 2019 | 25   | 1 | 25 | 12,5 |

|                                                                                                                                                  |                                                                                                                                                                                                                                                                                                                                                                                                                                                                                                                                                                                                                                                                                                                                                                                                                                                                                                                                                                                                                                                                         |                          |      |    |    |    |      |
|--------------------------------------------------------------------------------------------------------------------------------------------------|-------------------------------------------------------------------------------------------------------------------------------------------------------------------------------------------------------------------------------------------------------------------------------------------------------------------------------------------------------------------------------------------------------------------------------------------------------------------------------------------------------------------------------------------------------------------------------------------------------------------------------------------------------------------------------------------------------------------------------------------------------------------------------------------------------------------------------------------------------------------------------------------------------------------------------------------------------------------------------------------------------------------------------------------------------------------------|--------------------------|------|----|----|----|------|
| Molecular Evolution of Early-Onset Prostate Cancer Identifies Molecular Risk Markers and Clinical Trajectories                                   | Gerhauser, Clarissa; Favero, Francesco; Risch, Thomas; Simon, Ronald; Feuerbach, Lars; Assenov, Yassen; Heckmann, Doreen; Sidiropoulos, Nikos; Waszak, Sebastian M.; Huebschmann, Daniel; Urbanucci, Alfonso; Girma, Etsehiwot G.; Kuryshv, Vladimir; Klimczak, Leszek J.; Saini, Natalie; Stuetz, Adrian M.; Weichenhan, Dieter; Boettcher, Lisa-Marie; Toth, Reka; Hendriksen, Josephine D.; Koop, Christina; Lutsik, Pavlo; Matzk, Soeren; Warnatz, Hans-Joerg; Amstislayskiy, Vyacheslav; Feuerstein, Clarissa; Raeder, Benjamin; Bogatyrova, Olga; Schmitz, Eva-Maria; Hube-Magg, Claudia; Kluth, Martina; Hulan, Hartwig; Graefen, Markus; Lawerenz, Chris; Henry, Gervaise H.; Yamaguchi, Takafumi N.; Malewska, Alicia; Meiners, Jan; Schilling, Daniela; Reisinger, Eva; Eils, Roland; Schlesner, Matthias; Strand, Douglas W.; Bristow, Robert G.; Boutros, Paul C.; von Kalle, Christof; Gordenin, Dmitry; Suelmann, Holger; Brors, Benedikt; Sauter, Guido; Plass, Christoph; Yaspo, Marie-Laure; Korbel, Jan O.; Schlomm, Thorsten; Weischenfeldt, Joachim | CANCER CELL              | 2018 | 34 | 6  | 25 | 8,33 |
| A PDX/Organoid Biobank of Advanced Prostate Cancers Captures Genomic and Phenotypic Heterogeneity for Disease Modeling and Therapeutic Screening | Beshiri, Michael L.; Tice, Caitlin M.; Tran, Crystal; Nguyen, Holly M.; Sowalsky, Adam G.; Agarwal, Supreet; Jansson, Keith H.; Yang, Qi; McGowen, Kerry M.; Yin, JuanJuan; Alilin, Aian Neil; Karzai, Fatima H.; Dahut, William L.; Corey, Eva; Kelly, Kathleen                                                                                                                                                                                                                                                                                                                                                                                                                                                                                                                                                                                                                                                                                                                                                                                                        | CLINICAL CANCER RESEARCH | 2018 | 24 | 17 | 25 | 8,33 |



|                                                                                                                       |                                                                                                                                                                                                                                                                                                                                                                                                                                                               |                                                                                 |      |     |    |    |      |
|-----------------------------------------------------------------------------------------------------------------------|---------------------------------------------------------------------------------------------------------------------------------------------------------------------------------------------------------------------------------------------------------------------------------------------------------------------------------------------------------------------------------------------------------------------------------------------------------------|---------------------------------------------------------------------------------|------|-----|----|----|------|
| Diverse AR-V7 cistromes in castration-resistant prostate cancer are governed by HoxB13                                | Chen, Zhong; Wu, Dayong; Thomas-Ahner, Jennifer M.; Lu, Changxue; Zhao, Pei; Zhang, Qingfu; Geraghty, Connor; Yan, Pearly S.; Hankey, William; Sunkel, Benjamin; Cheng, Xiaolong; Antonarakis, Emmanuel S.; Wang, Qi-En; Liu, Zhihua; Huang, Tim H-M; Jin, Victor X.; Clinton, Steven K.; Luo, Jun; Huang, Jiaoti; Wang, Qianben                                                                                                                              | PROCEEDINGS OF THE NATIONAL ACADEMY OF SCIENCES OF THE UNITED STATES OF AMERICA | 2018 | 115 | 26 | 25 | 8,33 |
| Treatment of Advanced Prostate Cancer-A Review of Current Therapies and Future Promise                                | Sumanasuriya, Semini; De Bono, Johann                                                                                                                                                                                                                                                                                                                                                                                                                         | COLD SPRING HARBOR PERSPECTIVES IN MEDICINE                                     | 2018 | 8   | 6  | 25 | 8,33 |
| GC-MS based metabolomics used for the identification of cancer volatile organic compounds as biomarkers               | Lubes, Giuseppe; Goodarzi, Mohammad                                                                                                                                                                                                                                                                                                                                                                                                                           | JOURNAL OF PHARMACEUTICAL AND BIOMEDICAL ANALYSIS                               | 2018 | 147 |    | 25 | 8,33 |
| Intratumoural evolutionary landscape of high-risk prostate cancer: the PROGENY study of genomic and immune parameters | Linch, M.; Goh, G.; Hiley, C.; Shanmugabavan, Y.; McGranahan, N.; Rowan, A.; Wong, Y. N. S.; King, H.; Furness, A.; Freeman, A.; Linares, J.; Akarca, A.; Herrero, J.; Rosenthal, R.; Harder, N.; Schmidt, G.; Wilson, G. A.; Birkbak, N. J.; Mitter, R.; Dentre, S.; Cathcart, P.; Arya, M.; Johnston, E.; Scott, R.; Hung, M.; Emberton, M.; Attard, G.; Szallasi, Z.; Punwani, S.; Quezada, S. A.; Marafioti, T.; Gerlinger, M.; Ahmed, H. U.; Swanton, C. | ANNALS OF ONCOLOGY                                                              | 2017 | 28  | 10 | 25 | 6,25 |
| Cell Cycle Control by PTEN                                                                                            | Brandmaier, Andrew; Hou, Sheng-Qi; Shen, Wen H.                                                                                                                                                                                                                                                                                                                                                                                                               | JOURNAL OF MOLECULAR BIOLOGY                                                    | 2017 | 429 | 15 | 25 | 6,25 |

|                                                                                                                                                          |                                                                                                                                                                                                                                                                                                                                                                                                        |                                             |      |     |    |    |      |
|----------------------------------------------------------------------------------------------------------------------------------------------------------|--------------------------------------------------------------------------------------------------------------------------------------------------------------------------------------------------------------------------------------------------------------------------------------------------------------------------------------------------------------------------------------------------------|---------------------------------------------|------|-----|----|----|------|
| Genomic landscape of high-grade meningiomas                                                                                                              | Bi, Wenya Linda; Greenwald, Noah F.; Abedalthagafi, Malak; Wala, Jeremiah; Gibson, Will J.; Agarwalla, Pankaj K.; Horowitz, Peleg; Schumacher, Steven E.; Esaulova, Ekaterina; Mei, Yu; Chevalier, Aaron; Ducar, Matthew A.; Thorner, Aaron R.; van Hummelen, Paul; Stemmer-Rachamimov, Anat O.; Artyomov, Maksym; Al-Mefty, Ossama; Dunn, Gavin P.; Santagata, Sandro; Dunn, Ian F.; Beroukhi, Rameen | NPJ GENOMIC MEDICINE                        | 2017 | 2   |    | 25 | 6,25 |
| Mitochondrial mutations and metabolic adaptation in pancreatic cancer                                                                                    | Hardie, Rae-Anne; van Dam, Ellen; Cowley, Mark; Han, Ting-Li; Balaban, Seher; Pajic, Marina; Pinese, Mark; Iconomou, Mary; Shearer, Robert F.; McKenna, Jessie; Miller, David; Waddell, Nicola; Pearson, John V.; Grimmond, Sean M.; Sazanov, Leonid; Biankin, Andrew V.; Villas-Boas, Silas; Hoy, Andrew J.; Turner, Nigel; Saunders, Darren N.                                                       | CANCER & METABOLISM                         | 2017 | 5   |    | 25 | 6,25 |
| Dissecting the Heterogeneity of Circulating Tumor Cells in Metastatic Breast Cancer: Going Far Beyond the Needle in the Haystack                         | Bulfoni, Michela; Turetta, Matteo; Del Ben, Fabio; Di Loreto, Carla; Beltrami, Antonio Paolo; Cesselli, Daniela                                                                                                                                                                                                                                                                                        | INTERNATIONAL JOURNAL OF MOLECULAR SCIENCES | 2016 | 17  | 10 | 25 | 5    |
| Systems Glycobiology: Integrating Glycogenomics, Glycoproteomics, Glycomics, and Other 'Omics Data Sets to Characterize Cellular Glycosylation Processes | Bennun, Sandra V.; Hizal, Deniz Baycin; Heffner, Kelley; Can, Ozge; Zhang, Hui; Betenbaugh, Michael J.                                                                                                                                                                                                                                                                                                 | JOURNAL OF MOLECULAR BIOLOGY                | 2016 | 428 | 16 | 25 | 5    |
| Copy number variations in urine cell free DNA as biomarkers in advanced prostate cancer                                                                  | Xia, Yun; Huang, Chiang-Ching; Dittmar, Rachel; Du, Meijun; Wang, Yuan; Liu, Hongyan; Shenoy, Niraj; Wang, Liang; Kohli, Manish                                                                                                                                                                                                                                                                        | ONCOTARGET                                  | 2016 | 7   | 24 | 25 | 5    |

|                                                                                                                                                  |                                                                                                                                                                                                                                                                                                                                                                                                          |                           |      |     |    |    |   |
|--------------------------------------------------------------------------------------------------------------------------------------------------|----------------------------------------------------------------------------------------------------------------------------------------------------------------------------------------------------------------------------------------------------------------------------------------------------------------------------------------------------------------------------------------------------------|---------------------------|------|-----|----|----|---|
| Validation of a Genomic Classifier for Predicting Post-Prostatectomy Recurrence in a Community Based Health Care Setting                         | Glass, Andrew G.; Leo, Michael C.; Haddad, Zaid; Yousefi, Kasra; du Plessis, Marguerite; Chen, Chuhe; Choeurng, Voleak; Abdollah, Firas; Robbins, Bruce; Ra, Seong; Richert-Boe, Kathryn E.; Buerki, Christine; Pearson, Kathy; Davicioni, Elai; Weinmann, Sheila                                                                                                                                        | JOURNAL OF UROLOGY        | 2016 | 195 | 6  | 25 | 5 |
| Targeted proteomics identifies liquid-biopsy signatures for extracapsular prostate cancer                                                        | Kim, Yune; Jeon, Jouhyun; Mejia, Salvador; Yao, Cindy Q.; Ignatchenko, Vladimir; Nyalwidhe, Julius O.; Gramolini, Anthony O.; Lance, Raymond S.; Troyer, Dean A.; Drake, Richard R.; Boutros, Paul C.; Semmes, O. John; Kislinger, Thomas                                                                                                                                                                | NATURE COMMUNICATIONS     | 2016 | 7   |    | 25 | 5 |
| Regulation of E3 ubiquitin ligase-1 (WWP1) by microRNA-452 inhibits cancer cell migration and invasion in prostate cancer                        | Goto, Yusuke; Kojima, Satoko; Kurozumi, Akira; Kato, Mayuko; Okato, Atsushi; Matsushita, Ryosuke; Ichikawa, Tomohiko; Seki, Naohiko                                                                                                                                                                                                                                                                      | BRITISH JOURNAL OF CANCER | 2016 | 114 | 10 | 25 | 5 |
| The Childhood Solid Tumor Network: A new resource for the developmental biology and oncology research communities                                | Stewart, Elizabeth; Federico, Sara; Karlstrom, Asa; Shelat, Anang; Sablauer, Andras; Pappo, Alberto; Dyer, Michael A.                                                                                                                                                                                                                                                                                    | DEVELOPMENTAL BIOLOGY     | 2016 | 411 | 2  | 25 | 5 |
| Distinct lymphocyte antigens 6 (Ly6) family members Ly6D, Ly6E, Ly6K and Ly6H drive tumorigenesis and clinical outcome                           | Luo, Linlin; McGarvey, Peter; Madhavan, Subha; Kumar, Rakesh; Gusev, Yuriy; Upadhyay, Geeta                                                                                                                                                                                                                                                                                                              | ONCOTARGET                | 2016 | 7   | 10 | 25 | 5 |
| Unscrambling the genomic chaos of osteosarcoma reveals extensive transcript fusion, recurrent rearrangements and frequent novel TP53 aberrations | Lorenz, Susanne; Baroy, Tale; Sun, Jinchang; Nome, Torfinn; Vodak, Daniel; Bryne, Jan-Christian; Hakelien, Anne-Mari; Fernandez-Cuesta, Lynnette; Moehlendick, Birte; Rieder, Harald; Szuhai, Karoly; Zaikova, Olga; Ahlquist, Terje C.; Thomassen, Gard O. S.; Skotheim, Rolf I.; Lothe, Ragnhild A.; Tarpey, Patrick S.; Campbell, Peter; Flanagan, Adrienne; Myklebost, Ola; Meza-Zepeda, Leonardo A. | ONCOTARGET                | 2016 | 7   | 5  | 25 | 5 |

|                                                                                                                                                                 |                                                                                                                                                                                                                                                  |                                     |      |     |     |    |      |
|-----------------------------------------------------------------------------------------------------------------------------------------------------------------|--------------------------------------------------------------------------------------------------------------------------------------------------------------------------------------------------------------------------------------------------|-------------------------------------|------|-----|-----|----|------|
| New blood markers detection technology: A leap in the diagnosis of gastric cancer                                                                               | Beeharry, Maneesh K.; Liu, Wen-Tao; Yan, Min; Zhu, Zheng-Gang                                                                                                                                                                                    | WORLD JOURNAL OF GASTROENTEROLOGY   | 2016 | 22  | 3   | 25 | 5    |
| Integration of tissue metabolomics, transcriptomics and immunohistochemistry reveals ERG- and gleason score-specific metabolomic alterations in prostate cancer | Meller, Sebastian; Meyer, Hellmuth-A; Bethan, Bianca; Dietrich, Dimo; Maldonado, Sandra Gonzalez; Lein, Michael; Montani, Matteo; Reszka, Regina; Schatz, Philipp; Peter, Erik; Stephan, Carsten; Jung, Klaus; Kamlage, Beate; Kristiansen, Glen | ONCOTARGET                          | 2016 | 7   | 2   | 25 | 5    |
| Urine metabolic phenotypes analysis of extrahepatic cholangiocarcinoma disease using ultra-high performance liquid chromatography-mass spectrometry             | Wang, Xinxin; Li, Jun; Zhang, Ai-Hua                                                                                                                                                                                                             | RSC ADVANCES                        | 2016 | 6   | 67  | 25 | 5    |
| High-throughput metabolomics to identify metabolites to serve as diagnostic biomarkers of prostate cancer                                                       | Li, Yuanfeng; Qiu, Shi; Zhang, Ai Hua                                                                                                                                                                                                            | ANALYTICAL METHODS                  | 2016 | 8   | 16  | 25 | 5    |
| MAPK/ERK signaling pathway-induced hyper-O-GlcNAcylation enhances cancer malignancy                                                                             | Zhang, Xinling; Ma, Leina; Qi, Jieqiong; Shan, Hui; Yu, Wengong; Gu, Yuchao                                                                                                                                                                      | MOLECULAR AND CELLULAR BIOCHEMISTRY | 2015 | 410 | 1-2 | 25 | 4,17 |
| Synergistic action of image-guided radiotherapy and androgen deprivation therapy                                                                                | Locke, Jennifer A.; Dal Pra, Alan; Supiot, Stephane; Warde, Pdraig; Bristow, Robert G.                                                                                                                                                           | NATURE REVIEWS UROLOGY              | 2015 | 12  | 4   | 25 | 4,17 |
| Circulating Tumor Cell Analysis in Metastatic Triple-Negative Breast Cancers                                                                                    | Magbanua, Mark Jesus M.; Carey, Lisa A.; DeLuca, Amy; Hwang, Jimmy; Scott, Janet H.; Rimawi, Mothaffar F.; Mayer, Erica L.; Marcom, P. Kelly; Liu, Minetta C.; Esteva, Francisco J.; Park, John W.; Rugo, Hope S.                                | CLINICAL CANCER RESEARCH            | 2015 | 21  | 5   | 25 | 4,17 |
| OTUB1 de-ubiquitinating enzyme promotes prostate cancer cell invasion in vitro and tumorigenesis in vivo                                                        | Iglesias-Gato, Diego; Chuan, Yin-Choy; Jiang, Ning; Svensson, Charlotte; Bao, Jing; Paul, Indranil; Egevad, Lars; Kessler, Benedikt M.; Wikstorm, Pernilla; Niu, Yuanjie; Flores-Morales, Amilcar                                                | MOLECULAR CANCER                    | 2015 | 14  |     | 25 | 4,17 |

|                                                                                                            |                                                                                                                                                                                                                                       |                                         |      |     |    |    |    |
|------------------------------------------------------------------------------------------------------------|---------------------------------------------------------------------------------------------------------------------------------------------------------------------------------------------------------------------------------------|-----------------------------------------|------|-----|----|----|----|
| Prevalence of Germline Variants in Prostate Cancer and Implications for Current Genetic Testing Guidelines | Nicolosi, Piper; Ledet, Elisa; Yang, Shan; Michalski, Scott; Freschi, Brandy; O'Leary, Erin; Esplin, Edward D.; Nussbaum, Robert L.; Sartor, Oliver                                                                                   | JAMA ONCOLOGY                           | 2019 | 5   | 4  | 24 | 12 |
| Polycomb- and Methylation-Independent Roles of EZH2 as a Transcription Activator                           | Kim, Jung; Lee, Yongik; Lu, Xiaodong; Song, Bing; Fong, Ka-Wing; Cao, Qi; Licht, Jonathan D.; Zhao, Jonathan C.; Yu, Jindan                                                                                                           | CELL REPORTS                            | 2018 | 25  | 10 | 24 | 8  |
| Cancer stem cells: Regulation programs, immunological properties and immunotherapy                         | Zhang, Dingxiao; Tang, Dean G.; Rycaj, Kiera                                                                                                                                                                                          | SEMINARS IN CANCER BIOLOGY              | 2018 | 52  |    | 24 | 8  |
| Mass Spectrometry-Based Chemical and Enzymatic Methods for Global Analysis of Protein Glycosylation        | Xiao, Haopeng; Suttapitugsakul, Suttipong; Sun, Fangxu; Wu, Ronghu                                                                                                                                                                    | ACCOUNTS OF CHEMICAL RESEARCH           | 2018 | 51  | 8  | 24 | 8  |
| FAM35A associates with REV7 and modulates DNAdamage responses of normal and BRCA1-defective cells          | Tomida, Junya; Takata, Kei-ichi; Bhetawal, Sarita; Person, Maria D.; Chao, Hsueh-Ping; Tang, Dean G.; Wood, Richard D.                                                                                                                | EMBO JOURNAL                            | 2018 | 37  | 12 | 24 | 8  |
| Microsatellite instability in prostate cancer by PCR or next-generation sequencing                         | Hempelmann, Jennifer A.; Lockwood, Christina M.; Konnick, Eric Q.; Schweizer, Michael T.; Antonarakis, Emmanuel S.; Lotan, Tamara L.; Montgomery, Bruce; Nelson, Peter S.; Klemfuss, Nola; Salipante, Stephen J.; Pritchard, Colin C. | JOURNAL FOR IMMUNOTHERAPY OF CANCER     | 2018 | 6   |    | 24 | 8  |
| AKR1C1 Activates STAT3 to Promote the Metastasis of Non-Small Cell Lung Cancer                             | Zhu, Hong; Chang, Lin-Lin; Yan, Fang-Jie; Hu, Yan; Zeng, Chen-Ming; Zhou, Tian-Yi; Yuan, Tao; Ying, Mei-Dan; Cao, Ji; He, Qiao-Jun; Yang, Bo                                                                                          | THERANOSTICS                            | 2018 | 8   | 3  | 24 | 8  |
| Urinary biomarkers in prostate cancer detection and monitoring progression                                 | Wu, DuoJia; Ni, Jie; Beretov, Julia; Cozzi, Paul; Willcox, Mark; Wasinger, Valerie; Walsh, Bradley; Graham, Peter; Li, Yong                                                                                                           | CRITICAL REVIEWS IN ONCOLOGY HEMATOLOGY | 2017 | 118 |    | 24 | 6  |
| Telomeres and telomerase in prostate cancer development and therapy                                        | Graham, Mindy Kim; Meeker, Alan                                                                                                                                                                                                       | NATURE REVIEWS UROLOGY                  | 2017 | 14  | 10 | 24 | 6  |

|                                                                                                                                                                                                |                                                                                                                                                                                                                                                                                                                                                                                                                                                                                                      |                          |      |     |    |    |   |
|------------------------------------------------------------------------------------------------------------------------------------------------------------------------------------------------|------------------------------------------------------------------------------------------------------------------------------------------------------------------------------------------------------------------------------------------------------------------------------------------------------------------------------------------------------------------------------------------------------------------------------------------------------------------------------------------------------|--------------------------|------|-----|----|----|---|
| Tunicamycin induced endoplasmic reticulum stress promotes apoptosis of prostate cancer cells by activating mTORC1                                                                              | Guha, Prasun; Kaptan, Engin; Gade, Padmaja; Kalvakolanu, Dhananjaya V.; Ahmed, Hafiz                                                                                                                                                                                                                                                                                                                                                                                                                 | ONCOTARGET               | 2017 | 8   | 40 | 24 | 6 |
| Decipher Test Impacts Decision Making Among Patients Considering Adjuvant and Salvage Treatment After Radical Prostatectomy: Interim Results From the Multicenter Prospective PRO-IMPACT Study | Gore, John L.; du Plessis, Marguerite G.; Santiago-Jimenez, Maria K.; Yousefi, Kasra K.; Thompson, Darby K.; Karsh, Lawrence P.; Lane, Brian R.; Franks, Michael T.; Chen, David S.; Bandyk, Mark P.; Bianco, Fernando J.; Brown, Gordon T.; Clark, William R.; Kibel, Adam S.; Kim, Hyung A.; Lowrance, William M.; Manoharan, Murugesan T.; Maroni, Paul U.; Perrapato, Scott, V; Sieber, Paul R.; Trabulsi, Edouard J.; Waterhouse, Robert C.; Davicioni, Elai T.; Lotan, Yair A.; Lin, Daniel W. | CANCER                   | 2017 | 123 | 15 | 24 | 6 |
| Autoantibody biomarkers for the detection of serous ovarian cancer                                                                                                                             | Katchman, Benjamin A.; Chowell, Diego; Wallstrom, Garrick; Vitonis, Allison F.; LaBaer, Joshua; Cramer, Daniel W.; Anderson, Karen S.                                                                                                                                                                                                                                                                                                                                                                | GYNECOLOGIC ONCOLOGY     | 2017 | 146 | 1  | 24 | 6 |
| Quantitative proteomics by SWATH-MS reveals sophisticated metabolic reprogramming in hepatocellular carcinoma tissues                                                                          | Gao, Yanyan; Wang, Xinzheng; Sang, Zhihong; Li, Zongcheng; Liu, Feng; Mao, Jie; Yan, Dan; Zhao, Yongqiang; Wang, Hongli; Li, Ping; Ying, Xiaomin; Zhang, Xuemin; He, Kun; Wang, Hongxia                                                                                                                                                                                                                                                                                                              | SCIENTIFIC REPORTS       | 2017 | 7   |    | 24 | 6 |
| Pan-Cancer Analysis of the Mediator Complex Transcriptome Identifies CDK19 and CDK8 as Therapeutic Targets in Advanced Prostate Cancer                                                         | Braegelmann, Johannes; Kluemper, Niklas; Offermann, Anne; Von Maessenhausen, Anne; Boehm, Diana; Deng, Mario; Queisser, Angela; Sanders, Christine; Syring, Isabella; Merseburger, Axel S.; Vogel, Wenzel; Sievers, Elisabeth; Vlasic, Ignacija; Carlsson, Jessica; Andren, Ove; Brossart, Peter; Duensing, Stefan; Svensson, Maria A.; Shaikhibrahim, Zaki; Kirfel, Jutta; Perner, Sven                                                                                                             | CLINICAL CANCER RESEARCH | 2017 | 23  | 7  | 24 | 6 |

|                                                                                                                                                                                              |                                                                                                                                                                                                                                                            |                                           |      |     |    |    |     |
|----------------------------------------------------------------------------------------------------------------------------------------------------------------------------------------------|------------------------------------------------------------------------------------------------------------------------------------------------------------------------------------------------------------------------------------------------------------|-------------------------------------------|------|-----|----|----|-----|
| Non-Genomic Actions of the Androgen Receptor in Prostate Cancer                                                                                                                              | Leung, Jacky K.; Sadar, Marianne D.                                                                                                                                                                                                                        | FRONTIERS IN ENDOCRINOLOGY                | 2017 | 8   |    | 24 | 6   |
| Amino Acid Profiles of Serum and Urine in Search for Prostate Cancer Biomarkers: a Pilot Study                                                                                               | Derezinski, Pawel; Klupczynska, Agnieszka; Sawicki, Wojciech; Palka, Jerzy A.; Kokot, Zenon J.                                                                                                                                                             | INTERNATIONAL JOURNAL OF MEDICAL SCIENCES | 2017 | 14  | 1  | 24 | 6   |
| Antibody-drug conjugate targeting CD46 eliminates multiple myeloma cells                                                                                                                     | Sherbenou, Daniel W.; Aftab, Blake T.; Su, Yang; Behrens, Christopher R.; Wiita, Arun; Logan, Aaron C.; Acosta-Alvear, Diego; Hann, Byron C.; Walter, Peter; Shuman, Marc A.; Wu, Xiaobo; Atkinson, John P.; Wolf, Jeffrey L.; Martin, Thomas G.; Liu, Bin | JOURNAL OF CLINICAL INVESTIGATION         | 2016 | 126 | 12 | 24 | 4,8 |
| OCT-4: a novel estrogen receptor-alpha collaborator that promotes tamoxifen resistance in breast cancer cells                                                                                | Bhatt, S.; Stender, J. D.; Joshi, S.; Wu, G.; Katzenellenbogen, B. S.                                                                                                                                                                                      | ONCOGENE                                  | 2016 | 35  | 44 | 24 | 4,8 |
| Effects of 8-Year Treatment of Long-Acting Testosterone Undecanoate on Metabolic Parameters, Urinary Symptoms, Bone Mineral Density, and Sexual Function in Men With Late-Onset Hypogonadism | Permpongkosol, Sompol; Khupulsup, Kalayanee; Leelaphiwat, Supatra; Pavavattananusorn, Sarawan; Thongpradit, Supranee; Petchthong, Thanom                                                                                                                   | JOURNAL OF SEXUAL MEDICINE                | 2016 | 13  | 8  | 24 | 4,8 |
| Protein Counting in Single Cancer Cells                                                                                                                                                      | Schubert, Stephanie M.; Walter, Stephanie R.; Manesse, Mael; Walt, David R.                                                                                                                                                                                | ANALYTICAL CHEMISTRY                      | 2016 | 88  | 5  | 24 | 4,8 |
| Differentially methylated genes and androgen receptor re-expression in small cell prostate carcinomas                                                                                        | Kleb, Brittany; Estecio, Marcos R. H.; Zhang, Jiexin; Tzelepid, Vassiliki; Chung, Woonbok; Jelinek, Jaroslav; Navone, Nora M.; Tahir, Salahaldin; Marquez, Victor E.; Issa, Jean-Pierre; Maity, Sankar; Aparicio, Ana                                      | EPIGENETICS                               | 2016 | 11  | 3  | 24 | 4,8 |
| Interplay among Drosophila transcription factors Ets21c, Fos and Ftz-F1 drives JNK-mediated tumor malignancy                                                                                 | Kuelshammer, Eva; Mundorf, Juliane; Kilinc, Merve; Frommolt, Peter; Wagle, Prerana; Uhlirova, Mirka                                                                                                                                                        | DISEASE MODELS & MECHANISMS               | 2015 | 8   | 10 | 24 | 4   |

|                                                                                                                                                 |                                                                                                                                                                                                                                                                                                                                                                                                                                                                                                                                                                                                                |                          |      |     |    |    |      |
|-------------------------------------------------------------------------------------------------------------------------------------------------|----------------------------------------------------------------------------------------------------------------------------------------------------------------------------------------------------------------------------------------------------------------------------------------------------------------------------------------------------------------------------------------------------------------------------------------------------------------------------------------------------------------------------------------------------------------------------------------------------------------|--------------------------|------|-----|----|----|------|
| Two new loci and gene sets related to sex determination and cancer progression are associated with susceptibility to testicular germ cell tumor | Kristiansen, Wenche; Karlsson, Robert; Rounge, Trine B.; Whittington, Thomas; Andreassen, Bettina K.; Magnusson, Patrik K.; Fossa, Sophie D.; Adami, Hans-Olov; Turnbull, Clare; Haugen, Trine B.; Grotmol, Tom; Wiklund, Fredrik                                                                                                                                                                                                                                                                                                                                                                              | HUMAN MOLECULAR GENETICS | 2015 | 24  | 14 | 24 | 4    |
| Colorimetric detection of both total genomic and loci-specific DNA methylation from limited DNA inputs                                          | Wee, Eugene J. H.; Ngo, Thu Ha; Trau, Matt                                                                                                                                                                                                                                                                                                                                                                                                                                                                                                                                                                     | CLINICAL EPIGENETICS     | 2015 | 7   |    | 24 | 4    |
| Effect of a genomic classifier test on clinical practice decisions for patients with high-risk prostate cancer after surgery                    | Badani, Ketan K.; Thompson, Darby J.; Brown, Gordon; Holmes, Daniel; Kella, Naveen; Albala, David; Singh, Amar; Buerki, Christine; Davicioni, Elai; Hornberger, John                                                                                                                                                                                                                                                                                                                                                                                                                                           | BJU INTERNATIONAL        | 2015 | 115 | 3  | 24 | 4    |
| Molecular Foundations for Personalized Therapy in Prostate Cancer                                                                               | Fisher, Kurt W.; Montironi, Rodolfo; Lopez Beltran, Antonio; Moch, Holger; Wang, Lisha; Scarpelli, Marina; Williamson, Sean R.; Koch, Michael O.; Cheng, Liang                                                                                                                                                                                                                                                                                                                                                                                                                                                 | CURRENT DRUG TARGETS     | 2015 | 16  | 2  | 24 | 4    |
| ARv7 Represses Tumor-Suppressor Genes in Castration-Resistant Prostate Cancer                                                                   | Cato, Laura; de Tribolet-Hardy, Jonas; Lee, Irene; Rottenberg, Jaice T.; Coleman, Ilsa; Melchers, Diana; Houtman, Rene; Xiao, Tengfei; Li, Wei; Uo, Takuma; Sun, Shihua; Kuznik, Nane C.; Goepfert, Bettina; Ozgun, Fatma; van Royen, Martin E.; Houtsmuller, Adriaan B.; Vadhi, Raga; Rao, Prakash K.; Li, Lewyn; Balk, Steven P.; Den, Robert B.; Trock, Bruce J.; Karnes, R. Jeffrey; Jenkins, Robert B.; Klein, Eric A.; Davicioni, Elai; Gruhl, Friederike J.; Long, Henry W.; Liu, X. Shirley; Cato, Andrew C. B.; Lack, Nathan A.; Nelson, Peter S.; Plymate, Stephen R.; Groner, Anna C.; Brown, Myles | CANCER CELL              | 2019 | 35  | 3  | 23 | 11,5 |



|                                                                                                                                        |                                                                                                                                                                                                                                                                                                                                                                                          |                                           |      |     |    |    |     |
|----------------------------------------------------------------------------------------------------------------------------------------|------------------------------------------------------------------------------------------------------------------------------------------------------------------------------------------------------------------------------------------------------------------------------------------------------------------------------------------------------------------------------------------|-------------------------------------------|------|-----|----|----|-----|
| Autoantibody biomarkers for the detection of serous ovarian cancer                                                                     | Katchman, Benjamin A.; Chowell, Diego; Wallstrom, Garrick; Vitonis, Allison F.; LaBaer, Joshua; Cramer, Daniel W.; Anderson, Karen S.                                                                                                                                                                                                                                                    | GYNECOLOGIC ONCOLOGY                      | 2017 | 146 | 1  | 24 | 6   |
| Database-augmented Mass Spectrometry Analysis of Exosomes Identifies Claudin 3 as a Putative Prostate Cancer Biomarker                 | Worst, Thomas Stefan; von Hardenberg, Jost; Gross, Julia Christina; Erben, Philipp; Schnoelzer, Martina; Hausser, Ingrid; Bugert, Peter; Michel, Maurice Stephan; Boutros, Michael                                                                                                                                                                                                       | MOLECULAR & CELLULAR PROTEOMICS           | 2017 | 16  | 6  | 24 | 6   |
| Quantitative proteomics by SWATH-MS reveals sophisticated metabolic reprogramming in hepatocellular carcinoma tissues                  | Gao, Yanyan; Wang, Xinzhen; Sang, Zhihong; Li, Zongcheng; Liu, Feng; Mao, Jie; Yan, Dan; Zhao, Yongqiang; Wang, Hongli; Li, Ping; Ying, Xiaomin; Zhang, Xuemin; He, Kun; Wang, Hongxia                                                                                                                                                                                                   | SCIENTIFIC REPORTS                        | 2017 | 7   |    | 24 | 6   |
| Cancer metastasis: issues and 'challenges                                                                                              | Qian, Chao-Nan; Mei, Yan; Zhang, Jian                                                                                                                                                                                                                                                                                                                                                    | CHINESE JOURNAL OF CANCER                 | 2017 | 36  |    | 24 | 6   |
| Pan-Cancer Analysis of the Mediator Complex Transcriptome Identifies CDK19 and CDK8 as Therapeutic Targets in Advanced Prostate Cancer | Braegelmann, Johannes; Kluemper, Niklas; Offermann, Anne; Von Maessenhausen, Anne; Boehm, Diana; Deng, Mario; Queisser, Angela; Sanders, Christine; Syring, Isabella; Merseburger, Axel S.; Vogel, Wenzel; Sievers, Elisabeth; Vlasic, Ignacija; Carlsson, Jessica; Andren, Ove; Brossart, Peter; Duensing, Stefan; Svensson, Maria A.; Shaikhibrahim, Zaki; Kirfel, Jutta; Perner, Sven | CLINICAL CANCER RESEARCH                  | 2017 | 23  | 7  | 24 | 6   |
| Amino Acid Profiles of Serum and Urine in Search for Prostate Cancer Biomarkers: a Pilot Study                                         | Derezinski, Pawel; Klupczynska, Agnieszka; Sawicki, Wojciech; Palka, Jerzy A.; Kokot, Zenon J.                                                                                                                                                                                                                                                                                           | INTERNATIONAL JOURNAL OF MEDICAL SCIENCES | 2017 | 14  | 1  | 24 | 6   |
| OCT-4: a novel estrogen receptor-alpha collaborator that promotes tamoxifen resistance in breast cancer cells                          | Bhatt, S.; Stender, J. D.; Joshi, S.; Wu, G.; Katzenellenbogen, B. S.                                                                                                                                                                                                                                                                                                                    | ONCOGENE                                  | 2016 | 35  | 44 | 24 | 4,8 |
| Sequencing Structural Variants in Cancer for Precision Therapeutics                                                                    | Macintyre, Geoff; Ylstra, Bauke; Brenton, James D.                                                                                                                                                                                                                                                                                                                                       | TRENDS IN GENETICS                        | 2016 | 32  | 9  | 24 | 4,8 |

|                                                                                                                                                                                              |                                                                                                                                                                                                                                   |                                   |      |    |    |    |     |
|----------------------------------------------------------------------------------------------------------------------------------------------------------------------------------------------|-----------------------------------------------------------------------------------------------------------------------------------------------------------------------------------------------------------------------------------|-----------------------------------|------|----|----|----|-----|
| Effects of 8-Year Treatment of Long-Acting Testosterone Undecanoate on Metabolic Parameters, Urinary Symptoms, Bone Mineral Density, and Sexual Function in Men With Late-Onset Hypogonadism | Permpongkosol, Sompol; Khupulsup, Kalayanee; Leelaphiwat, Supatra; Pavavattananusorn, Sarawan; Thongpradit, Supranee; Petchthong, Thanom                                                                                          | JOURNAL OF SEXUAL MEDICINE        | 2016 | 13 | 8  | 24 | 4,8 |
| CAPE suppresses migration and invasion of prostate cancer cells via activation of non-canonical Wnt signaling                                                                                | Tseng, Jen-Chih; Lin, Ching-Yu; Su, Liang-Chen; Fu, Hsiao-Hui; Yang, Shiaw-Der; Chuu, Chih-Pin                                                                                                                                    | ONCOTARGET                        | 2016 | 7  | 25 | 24 | 4,8 |
| Protein Counting in Single Cancer Cells                                                                                                                                                      | Schubert, Stephanie M.; Walter, Stephanie R.; Manesse, Mael; Walt, David R.                                                                                                                                                       | ANALYTICAL CHEMISTRY              | 2016 | 88 | 5  | 24 | 4,8 |
| Tissue Metabonomic Phenotyping for Diagnosis and Prognosis of Human Colorectal Cancer                                                                                                        | Tian, Yuan; Xu, Tangpeng; Huang, Jia; Zhang, Limin; Xu, Shan; Xiong, Bin; Wang, Yulan; Tang, Huiru                                                                                                                                | SCIENTIFIC REPORTS                | 2016 | 6  |    | 24 | 4,8 |
| Differentially methylated genes and androgen receptor re-expression in small cell prostate carcinomas                                                                                        | Kleb, Brittany; Estecio, Marcos R. H.; Zhang, Jiexin; Tzelepid, Vassiliki; Chung, Woonbok; Jelinek, Jaroslav; Navone, Nora M.; Tahir, Salahaldin; Marquez, Victor E.; Issa, Jean-Pierre; Maity, Sankar; Aparicio, Ana             | EPIGENETICS                       | 2016 | 11 | 3  | 24 | 4,8 |
| Two new loci and gene sets related to sex determination and cancer progression are associated with susceptibility to testicular germ cell tumor                                              | Kristiansen, Wenche; Karlsson, Robert; Rounge, Trine B.; Whittington, Thomas; Andreassen, Bettina K.; Magnusson, Patrik K.; Fossa, Sophie D.; Adami, Hans-Olov; Turnbull, Clare; Haugen, Trine B.; Grotmol, Tom; Wiklund, Fredrik | HUMAN MOLECULAR GENETICS          | 2015 | 24 | 14 | 24 | 4   |
| Colorimetric detection of both total genomic and loci-specific DNA methylation from limited DNA inputs                                                                                       | Wee, Eugene J. H.; Ngo, Thu Ha; Trau, Matt                                                                                                                                                                                        | CLINICAL EPIGENETICS              | 2015 | 7  |    | 24 | 4   |
| Targeting EZH2 for Cancer Therapy: Progress and Perspective                                                                                                                                  | Li, Chi Han; Chen, Yangchao                                                                                                                                                                                                       | CURRENT PROTEIN & PEPTIDE SCIENCE | 2015 | 16 | 6  | 24 | 4   |

|                                                                                                                                              |                                                                                                                                                                                                                                                                                                                                                                                                                                                                                                                                                          |                      |      |    |   |    |      |
|----------------------------------------------------------------------------------------------------------------------------------------------|----------------------------------------------------------------------------------------------------------------------------------------------------------------------------------------------------------------------------------------------------------------------------------------------------------------------------------------------------------------------------------------------------------------------------------------------------------------------------------------------------------------------------------------------------------|----------------------|------|----|---|----|------|
| Molecular Foundations for Personalized Therapy in Prostate Cancer                                                                            | Fisher, Kurt W.; Montironi, Rodolfo; Lopez Beltran, Antonio; Moch, Holger; Wang, Lisha; Scarpelli, Marina; Williamson, Sean R.; Koch, Michael O.; Cheng, Liang                                                                                                                                                                                                                                                                                                                                                                                           | CURRENT DRUG TARGETS | 2015 | 16 | 2 | 24 | 4    |
| Cell-free DNA profiling of metastatic prostate cancer reveals microsatellite instability, structural rearrangements and clonal hematopoiesis | Mayrhofer, Markus; De Laere, Bram; Whittington, Tom; Van Oyen, Peter; Ghysel, Christophe; Ampe, Jozef; Ost, Piet; Demey, Wim; Hoekx, Lucien; Schrijvers, Dirk; Brouwers, Barbara; Lybaert, Willem; Everaert, Els; De Maeseneer, Daan; Strijbos, Michiel; Bols, Alain; Fransis, Karen; Oeyen, Steffi; van Dam, Pieter-Jan; Van den Eynden, Gert; Rutten, Annemie; Aly, Markus; Nordstrom, Tobias; Van Laere, Steven; Rantalainen, Mattias; Rajan, Prabhakar; Egevad, Lars; Ullen, Anders; Yachnin, Jeffrey; Dirix, Luc; Gronberg, Henrik; Lindberg, Johan | GENOME MEDICINE      | 2018 | 10 |   | 23 | 7,67 |
| Integrated Pharmacodynamic Analysis Identifies Two Metabolic Adaption Pathways to Metformin in Breast Cancer                                 | Lord, Simon R.; Cheng, Wei-Chen; Liu, Dan; Gaude, Edoardo; Haider, Syed; Metcalf, Tom; Patel, Neel; Teoh, Eugene J.; Gleeson, Fergus; Bradley, Kevin; Wigfield, Simon; Zois, Christos; McGowan, Daniel R.; Ah-See, Mei-Lin; Thompson, Alastair M.; Sharma, Anand; Bidaut, Luc; Pollak, Michael; Roy, Pankaj G.; Karpe, Fredrik; James, Tim; English, Ruth; Adams, Rosie F.; Campo, Leticia; Ayers, Lisa; Snell, Cameron; Roxanis, Ioannis; Frezza, Christian; Fenwick, John D.; Buffa, Francesca M.; Harris, Adrian L.                                   | CELL METABOLISM      | 2018 | 28 | 5 | 23 | 7,67 |
| LncRNA MIR100HG promotes cell proliferation in triple- negative breast cancer through triplex formation with p27 loci                        | Wang, Shaowei; Ke, Hao; Zhang, Honglei; Ma, Yujie; Ao, Lei; Zou, Li; Yang, Qin; Zhu, Hao; Nie, Jianyun; Wu, Chunlian; Jiao, Baowei                                                                                                                                                                                                                                                                                                                                                                                                                       | CELL DEATH & DISEASE | 2018 | 9  |   | 23 | 7,67 |

|                                                                                                                 |                                                                                                                                                                                                                                                                                                                                                                                                              |                                       |      |    |    |    |      |
|-----------------------------------------------------------------------------------------------------------------|--------------------------------------------------------------------------------------------------------------------------------------------------------------------------------------------------------------------------------------------------------------------------------------------------------------------------------------------------------------------------------------------------------------|---------------------------------------|------|----|----|----|------|
| Designer Oncolytic Adenovirus: Coming of Age                                                                    | Baker, Alexander T.; Aguirre-Hernandez, Carmen; Hallden, Gunnel; Parker, Alan L.                                                                                                                                                                                                                                                                                                                             | CANCERS                               | 2018 | 10 | 6  | 23 | 7,67 |
| BRD4 Promotes DNA Repair and Mediates the Formation of TMPRSS2-ERG Gene Rearrangements in Prostate Cancer       | Li, Xiangyi; Baek, GuemHee; Ramanand, Susmita G.; Sharp, Adam; Gao, Yunpeng; Yuan, Wei; Welti, Jon; Rodrigues, Daniel N.; Dolling, David; Figueiredo, Ines; Sumanasuriya, Semini; Crespo, Mateus; Aslam, Adam; Li, Rui; Yin, Yi; Mukherjee, Bipasha; Kanchwala, Mohammed; Hughes, Ashley M.; Halsey, Wendy S.; Chiang, Cheng-Ming; Xing, Chao; Raj, Ganesh V.; Burma, Sandeep; de Bono, Johann; Mani, Ram S. | CELL REPORTS                          | 2018 | 22 | 3  | 23 | 7,67 |
| CRAF gene fusions in pediatric low-grade gliomas define a distinct drug response based on dimerization profiles | Jain, P.; Fierst, T. M.; Han, H. J.; Smith, T. E.; Vakil, A.; Storm, P. B.; Resnick, A. C.; Waanders, A. J.                                                                                                                                                                                                                                                                                                  | ONCOGENE                              | 2017 | 36 | 45 | 23 | 5,75 |
| Mitochondrial mutations drive prostate cancer aggression                                                        | Hopkins, Julia F.; Sabelnykova, Veronica Y.; Weischenfeldt, Joachim; Simon, Ronald; Aguiar, Jennifer A.; Alkallas, Rached; Heisler, Lawrence E.; Zhang, Junyan; Watson, John D.; Chua, Melvin L. K.; Fraser, Michael; Favero, Francesco; Lawerenz, Chris; Plass, Christoph; Sauter, Guido; McPherson, John D.; van der Kwast, Theodorus; Korb, Jan; Schlomm, Thorsten; Bristow, Robert G.; Boutros, Paul C.  | NATURE COMMUNICATIONS                 | 2017 | 8  |    | 23 | 5,75 |
| PARP Inhibitors in Prostate Cancer                                                                              | Geethakumari, Praveen Ramakrishnan; Schiewer, Matthew J.; Knudsen, Karen E.; Kelly, Wm. Kevin                                                                                                                                                                                                                                                                                                                | CURRENT TREATMENT OPTIONS IN ONCOLOGY | 2017 | 18 | 6  | 23 | 5,75 |
| FEN1 promotes tumor progression and confers cisplatin resistance in non-small-cell lung cancer                  | He, Lingfeng; Luo, Libo; Zhu, Hong; Yang, Huan; Zhang, Yilan; Wu, Huan; Sun, Hongfang; Jiang, Feng; Kathera, Chandra S.; Liu, Lingjie; Zhuang, Ziheng; Chen, Haoyan; Pan, Feiyan; Hu, Zhigang; Zhang, Jing; Guo, Zhigang                                                                                                                                                                                     | MOLECULAR ONCOLOGY                    | 2017 | 11 | 6  | 23 | 5,75 |

|                                                                                                                                                           |                                                                                                                                                                                                                                                                                                                 |                                       |      |    |    |    |      |
|-----------------------------------------------------------------------------------------------------------------------------------------------------------|-----------------------------------------------------------------------------------------------------------------------------------------------------------------------------------------------------------------------------------------------------------------------------------------------------------------|---------------------------------------|------|----|----|----|------|
| Global analysis of H3K27me3 as an epigenetic marker in prostate cancer progression                                                                        | Ngollo, Marjolaine; Lebert, Andre; Daures, Marine; Judes, Gaelle; Rifai, Khaldoun; Dubois, Lucas; Kemeny, Jean-Louis; Penault-Llorca, Frederique; Bignon, Yves-Jean; Guy, Laurent; Bernard-Gallon, Dominique                                                                                                    | BMC CANCER                            | 2017 | 17 |    | 23 | 5,75 |
| Resveratrol induces mitochondria-mediated, caspase-independent apoptosis in murine prostate cancer cells                                                  | Kumar, Sanjay; Eroglu, Erdal; Stokes, James A., III; Scissum-Gunn, Karyn; Saldanha, Sabita N.; Singh, Udai P.; Manne, Upender; Ponnazhagan, Selvarangan; Mishra, Manoj K.                                                                                                                                       | ONCOTARGET                            | 2017 | 8  | 13 | 23 | 5,75 |
| Metabolomics Applications in Precision Medicine: An Oncological Perspective                                                                               | Puchades-Carrasco, Leonor; Pineda-Lucena, Antonio                                                                                                                                                                                                                                                               | CURRENT TOPICS IN MEDICINAL CHEMISTRY | 2017 | 17 | 24 | 23 | 5,75 |
| Adding genetic risk score to family history identifies twice as many high-risk men for prostate cancer: Results from the prostate cancer prevention trial | Chen, Haitao; Liu, Xu; Brendler, Charles B.; Ankerst, Donna P.; Leach, Robin J.; Goodman, Phyllis J.; Lucia, M. Scott; Tangen, Catherine M.; Wang, Li; Hsu, Fang-Chi; Sun, Jielin; Kader, A. Karim; Isaacs, William B.; Helfand, Brian T.; Zheng, S. Lilly; Thompson, Ian M.; Platz, Elizabeth A.; Xu, Jianfeng | PROSTATE                              | 2016 | 76 | 12 | 23 | 4,6  |
| Quantification of Somatic Chromosomal Rearrangements in Circulating Cell-Free DNA from Ovarian Cancers                                                    | Harris, Faye R.; Kovtun, Irina V.; Smadbeck, James; Multinu, Francesco; Jatoi, Aminah; Kosari, Farhad; Kalli, Kimberly R.; Murphy, Stephen J.; Halling, Geoffrey C.; Johnson, Sarah H.; Liu, Minetta C.; Mariani, Andrea; Vasmatazis, George                                                                    | SCIENTIFIC REPORTS                    | 2016 | 6  |    | 23 | 4,6  |
| Epigenomic profiling of DNA methylation in paired prostate cancer versus adjacent benign tissue                                                           | Geybels, Milan S.; Zhao, Shanshan; Wong, Chao-Jen; Bibikova, Marina; Klotzle, Brandy; Wu, Michael; Ostrander, Elaine A.; Fan, Jian-Bing; Feng, Ziding; Stanford, Janet L.                                                                                                                                       | PROSTATE                              | 2015 | 75 | 16 | 23 | 3,83 |
| Nuclear Protein Sam68 Interacts with the Enterovirus 71 Internal Ribosome Entry Site and Positively Regulates Viral Protein Translation                   | Zhang, Hua; Song, Lei; Cong, Haolong; Tien, Po                                                                                                                                                                                                                                                                  | JOURNAL OF VIROLOGY                   | 2015 | 89 | 19 | 23 | 3,83 |

|                                                                                                                                                                                            |                                                                                                                                                                                                                                                                      |                                   |      |    |    |    |      |
|--------------------------------------------------------------------------------------------------------------------------------------------------------------------------------------------|----------------------------------------------------------------------------------------------------------------------------------------------------------------------------------------------------------------------------------------------------------------------|-----------------------------------|------|----|----|----|------|
| Role and regulation of coordinately expressed de novo purine biosynthetic enzymes PPAT and PAICS in lung cancer                                                                            | Goswami, Moloy T.; Chen, Guoan; Chakravarthi, Balabhadrapatruni V. S. K.; Pathi, Satya S.; Anand, Sharath K.; Carskadon, Shannon L.; Giordano, Thomas J.; Chinnaiyan, Arul M.; Thomas, Dafydd G.; Palanisamy, Nallasivam; Beer, David G.; Varambally, Sooryanarayana | ONCOTARGET                        | 2015 | 6  | 27 | 23 | 3,83 |
| Systematic enrichment analysis of potentially functional regions for 103 prostate cancer risk-associated loci                                                                              | Chen, Haitao; Yu, Hongjie; Wang, Jianqing; Zhang, Zheng; Gao, Zhengrong; Chen, Zhuo; Lu, Yulan; Liu, Wennuan; Jiang, Deke; Zheng, S. Lilly; Wei, Gong-hong; Issacs, William B.; Feng, Junjie; Xu, Jianfeng                                                           | PROSTATE                          | 2015 | 75 | 12 | 23 | 3,83 |
| Bone metastasis in prostate cancer: Recurring mitochondrial DNA mutation reveals selective pressure exerted by the bone microenvironment                                                   | Arnold, Rebecca S.; Fedewa, Stacey A.; Goodman, Michael; Osunkoya, Adeboye O.; Kissick, Haydn T.; Morrissey, Colm; True, Lawrence D.; Petros, John A.                                                                                                                | BONE                              | 2015 | 78 |    | 23 | 3,83 |
| Breast cancer risk associated with gene expression and genotype polymorphisms of the folate-metabolizing MTHFR gene: a case-control study in a high altitude Ecuadorian mestizo population | Lopez-Cortes, Andres; Echeverria, Carolina; Ona-Cisneros, Fabian; Eugenia Sanchez, Maria; Herrera, Camilo; Cabrera-Andrade, Alejandro; Rosales, Felipe; Ortiz, Malena; Paz-y-Mino, Cesar                                                                             | TUMOR BIOLOGY                     | 2015 | 36 | 8  | 23 | 3,83 |
| Capillary nano-immunoassays: advancing quantitative proteomics analysis, biomarker assessment, and molecular diagnostics                                                                   | Chen, Jin-Qiu; Wakefield, Lalage M.; Goldstein, David J.                                                                                                                                                                                                             | JOURNAL OF TRANSLATIONAL MEDICINE | 2015 | 13 |    | 23 | 3,83 |
| Functional proteomics of the epigenetic regulators ASXL1, ASXL2 and ASXL3: a convergence of proteomics and epigenetics for translational medicine                                          | Katoh, Masaru                                                                                                                                                                                                                                                        | EXPERT REVIEW OF PROTEOMICS       | 2015 | 12 | 3  | 23 | 3,83 |

|                                                                                                                                                                             |                                                                                                                                                                                                                                                                                                                                                                                                                                                                                                                                                                                                                                                                                          |                                      |      |    |   |    |      |
|-----------------------------------------------------------------------------------------------------------------------------------------------------------------------------|------------------------------------------------------------------------------------------------------------------------------------------------------------------------------------------------------------------------------------------------------------------------------------------------------------------------------------------------------------------------------------------------------------------------------------------------------------------------------------------------------------------------------------------------------------------------------------------------------------------------------------------------------------------------------------------|--------------------------------------|------|----|---|----|------|
| Proteomics of Microparticles with SILAC Quantification (PROMIS-Quan): A Novel Proteomic Method for Plasma Biomarker Quantification                                          | Harel, Michal; Oren-Giladi, Pazit; Kaidar-Person, Orit; Shaked, Yuval; Geiger, Tamar                                                                                                                                                                                                                                                                                                                                                                                                                                                                                                                                                                                                     | MOLECULAR & CELLULAR PROTEOMICS      | 2015 | 14 | 4 | 23 | 3,83 |
| The G-quadruplex-stabilising agent RHPS4 induces telomeric dysfunction and enhances radiosensitivity in glioblastoma cells                                                  | Berardinelli, F.; Siteni, S.; Tanzarella, C.; Stevens, M. F.; Sgura, A.; Antocchia, A.                                                                                                                                                                                                                                                                                                                                                                                                                                                                                                                                                                                                   | DNA REPAIR                           | 2015 | 25 |   | 23 | 3,83 |
| TrkB inhibition by GNF-4256 slows growth and enhances chemotherapeutic efficacy in neuroblastoma xenografts                                                                 | Croucher, Jamie L.; Iyer, Radhika; Li, Nanxin; Molteni, Valentina; Loren, Jon; Gordon, W. Perry; Tuntland, Tove; Liu, Bo; Brodeur, Garrett M.                                                                                                                                                                                                                                                                                                                                                                                                                                                                                                                                            | CANCER CHEMOTHERAPY AND PHARMACOLOGY | 2015 | 75 | 1 | 23 | 3,83 |
| Olaparib in patients with metastatic castration-resistant prostate cancer with DNA repair gene aberrations (TOPARP-B): a multicentre, open-label, randomised, phase 2 trial | Mateo, Joaquin; Porta, Nuria; Bianchini, Diletta; McGovern, Ursula; Elliott, Tony; Jones, Robert; Syndikus, Isabel; Ralph, Christy; Jain, Suneil; Varughese, Mohini; Parikh, Omi; Crabb, Simon; Robinson, Angus; McLaren, Duncan; Birtle, Alison; Tanguay, Jacob; Miranda, Susana; Figueiredo, Ines; Seed, George; Bertan, Claudia; Flohr, Penny; Ebbs, Berni; Rescigno, Pasquale; Fowler, Gemma; Ferreira, Ana; Riisnaes, Ruth; Pereira, Rita; Curcean, Andra; Chandler, Robert; Clarke, Matthew; Gurel, Bora; Crespo, Mateus; Rodrigues, Daniel Nava; Sandhu, Shahneen; Espinasse, Aude; Chatfield, Peter; Tunariu, Nina; Yuan, Wei; Hall, Emma; Carreira, Suzanne; de Bono, Johann S. | LANCET ONCOLOGY                      | 2020 | 21 | 1 | 22 | 22   |

|                                                                                                                                             |                                                                                                                                                                                                                                                                                                                                                                                                                                                                                                                                                                                                                                                                                                                                                                                                                                                                                                                                                                                                                                            |                                     |      |    |   |    |      |
|---------------------------------------------------------------------------------------------------------------------------------------------|--------------------------------------------------------------------------------------------------------------------------------------------------------------------------------------------------------------------------------------------------------------------------------------------------------------------------------------------------------------------------------------------------------------------------------------------------------------------------------------------------------------------------------------------------------------------------------------------------------------------------------------------------------------------------------------------------------------------------------------------------------------------------------------------------------------------------------------------------------------------------------------------------------------------------------------------------------------------------------------------------------------------------------------------|-------------------------------------|------|----|---|----|------|
| A precision oncology approach to the pharmacological targeting of mechanistic dependencies in neuroendocrine tumors                         | Alvarez, Mariano J.; Subramaniam, Prem S.; Tang, Laura H.; Grunn, Adina; Aburi, Mahalaxmi; Rieckhof, Gabrielle; Komissarova, Elena V.; Hagan, Elizabeth A.; Bodei, Lisa; Clemons, Paul A.; Dela Cruz, Filemon S.; Dhall, Deepti; Diolaiti, Daniel; Fraker, Douglas A.; Ghavami, Afshin; Kaemmerer, Daniel; Karan, Charles; Kidd, Mark; Kim, Kyoung M.; Kim, Hee C.; Kunju, Lakshmi P.; Langel, Ulo; Li, Zhong; Lee, Jeeyun; Li, Hai; LiVolsi, Virginia; Pfragner, Roswitha; Rainey, Allison R.; Realubit, Ronald B.; Remotti, Helen; Regberg, Jakob; Roses, Robert; Rustgi, Anil; Sepulveda, Antonia R.; Serra, Stefano; Shi, Chanjuan; Yuan, Xiaopu; Barberis, Massimo; Bergamaschi, Roberto; Chinnaiyan, Arul M.; Detre, Tony; Ezzat, Shereen; Frilling, Andrea; Hommann, Merten; Jaeger, Dirk; Kim, Michelle K.; Knudsen, Beatrice S.; Kung, Andrew L.; Leahy, Emer; Metz, David C.; Milsom, Jeffrey W.; Park, Young S.; Reidy-Lagunes, Diane; Schreiber, Stuart; Washington, Kay; Wiedenmann, Bertram; Modlin, Irvin; Califano, Andrea | NATURE GENETICS                     | 2018 | 50 | 7 | 22 | 7,33 |
| From biomarkers to therapeutic targets-the promises and perils of long non-coding RNAs in cancer                                            | Gutschner, Tony; Richtig, Georg; Haemmerle, Monika; Pichler, Martin                                                                                                                                                                                                                                                                                                                                                                                                                                                                                                                                                                                                                                                                                                                                                                                                                                                                                                                                                                        | CANCER AND METASTASIS REVIEWS       | 2018 | 37 | 1 | 22 | 7,33 |
| Long noncoding RNA: multiple players in gene expression                                                                                     | Chen, Xiaochang; Sun, Yunmei; Cai, Rui; Wang, Guoqiang; Shu, Xiaoyan; Pang, Weijun                                                                                                                                                                                                                                                                                                                                                                                                                                                                                                                                                                                                                                                                                                                                                                                                                                                                                                                                                         | BMB REPORTS                         | 2018 | 51 | 6 | 22 | 7,33 |
| Smart Combinations of Bioactive Compounds in Fruits and Vegetables May Guide New Strategies for Personalized Prevention of Chronic Diseases | van Breda, Simone G. J.; de Kok, Theo M. C. M.                                                                                                                                                                                                                                                                                                                                                                                                                                                                                                                                                                                                                                                                                                                                                                                                                                                                                                                                                                                             | MOLECULAR NUTRITION & FOOD RESEARCH | 2018 | 62 | 1 | 22 | 7,33 |



|                                                                                                                                                                     |                                                                                                                                                                                                                                                                                                                                                                                                                                                                                                                   |                                                       |      |      |    |    |     |
|---------------------------------------------------------------------------------------------------------------------------------------------------------------------|-------------------------------------------------------------------------------------------------------------------------------------------------------------------------------------------------------------------------------------------------------------------------------------------------------------------------------------------------------------------------------------------------------------------------------------------------------------------------------------------------------------------|-------------------------------------------------------|------|------|----|----|-----|
| Comparative Transcriptome Profiling Reveals Coding and Noncoding RNA Differences in NSCLC from African Americans and European Americans                             | Mitchell, Khadijah A.; Zingone, Adriana; Toulabi, Leila; Boeckelman, Jacob; Ryan, Brid M.                                                                                                                                                                                                                                                                                                                                                                                                                         | CLINICAL CANCER RESEARCH                              | 2017 | 23   | 23 | 22 | 5,5 |
| MALDI imaging mass spectrometry - From bench to bedside                                                                                                             | Schwamborn, Kristina; Kriegsmann, Mark; Weichert, Wilko                                                                                                                                                                                                                                                                                                                                                                                                                                                           | BIOCHIMICA ET BIOPHYSICA ACTA-PROTEINS AND PROTEOMICS | 2017 | 1865 | 7  | 22 | 5,5 |
| Translating a Prognostic DNA Genomic Classifier into the Clinic: Retrospective Validation in 563 Localized Prostate Tumors                                          | Lalonde, Emilie; Alkallas, Rached; Chua, Melvin Lee Kiang; Fraser, Michael; Haider, Syed; Meng, Alice; Zheng, Junyan; Yao, Cindy Q.; Picard, Valerie; Orain, Michele; Hovington, Helene; Murgic, Jure; Berlin, Alejandro; Lacombe, Louis; Bergeron, Alain; Fradet, Yves; Tetu, Bernard; Lindberg, Johan; Egevad, Lars; Gronberg, Henrik; Ross-Adams, Helen; Lamb, Alastair D.; Halim, Silvia; Dunning, Mark J.; Neal, David E.; Pintilie, Melania; van der Kwast, Theodorus; Bristow, Robert G.; Boutros, Paul C. | EUROPEAN UROLOGY                                      | 2017 | 72   | 1  | 22 | 5,5 |
| Streptomyces colonosanans sp nov., A Novel Actinobacterium Isolated Exhibiting Antioxidative Activity and Cytotoxic Potential against Human Colon Cancer Cell Lines | Law, Jodi Woan-Fei; Ser, Hooi-Leng; Duangjai, Acharaporn; Saokaew, Surasak; Bukhari, Sarah I.; Khan, Tahir M.; Ab Mutalib, Nurul-Syakima; Chan, Kok-Gan; Goh, Bey-Hing; Lee, Learn-Han                                                                                                                                                                                                                                                                                                                            | FRONTIERS IN MICROBIOLOGY                             | 2017 | 8    |    | 22 | 5,5 |
| Metabolomics approaches in pancreatic adenocarcinoma: tumor metabolism profiling predicts clinical outcome of patients                                              | Battini, S.; Faitot, F.; Imperiale, A.; Cicek, A. E.; Heimbürger, C.; Averous, G.; Bachellier, P.; Namer, I. J.                                                                                                                                                                                                                                                                                                                                                                                                   | BMC MEDICINE                                          | 2017 | 15   |    | 22 | 5,5 |

|                                                                                                                                                                                 |                                                                                                                                                                                                                                                                                                                                                                                                                                                                                                                                         |                            |      |    |   |    |     |
|---------------------------------------------------------------------------------------------------------------------------------------------------------------------------------|-----------------------------------------------------------------------------------------------------------------------------------------------------------------------------------------------------------------------------------------------------------------------------------------------------------------------------------------------------------------------------------------------------------------------------------------------------------------------------------------------------------------------------------------|----------------------------|------|----|---|----|-----|
| Genome-wide association study of prostate-specific antigen levels identifies novel loci independent of prostate cancer                                                          | Hoffmann, Thomas J.; Passarelli, Michael N.; Graff, Rebecca E.; Emami, Nima C.; Sakoda, Lori C.; Jorgenson, Eric; Habel, Laurel A.; Shan, Jun; Ranatunga, Dilrini K.; Quesenberry, Charles P.; Chao, Chun R.; Ghai, Nirupa R.; Aaronson, David; Presti, Joseph; Nordstrom, Tobias; Wang, Zhaoming; Berndt, Sonja I.; Chanock, Stephen J.; Mosley, Jonathan D.; Klein, Robert J.; Middha, Mridu; Lilja, Hans; Melander, Olle; Kvale, Mark N.; Kwok, Pui-Yan; Schaefer, Catherine; Risch, Neil; Van Den Eeden, Stephen K.; Witte, John S. | NATURE COMMUNICATIONS      | 2017 | 8  |   | 22 | 5,5 |
| SiNVICT: ultra-sensitive detection of single nucleotide variants and indels in circulating tumour DNA                                                                           | Kockan, Can; Hach, Faraz; Sarrafi, Iman; Bell, Robert H.; McConeghy, Brian; Beja, Kevin; Haegert, Anne; Wyatt, Alexander W.; Volik, Stanislav V.; Chi, Kim N.; Collins, Colin C.; Sahinalp, Cenk                                                                                                                                                                                                                                                                                                                                        | BIOINFORMATICS             | 2017 | 33 | 1 | 22 | 5,5 |
| Phenotypic plasticity in prostate cancer: role of intrinsically disordered proteins                                                                                             | Mooney, Steven M.; Jolly, Mohit Kumar; Levine, Herbert; Kulkarni, Prakash                                                                                                                                                                                                                                                                                                                                                                                                                                                               | ASIAN JOURNAL OF ANDROLOGY | 2016 | 18 | 5 | 22 | 4,4 |
| Insulin-like Growth Factor 1 Signaling Axis Meets p53 Genome Protection Pathways                                                                                                | Werner, Haim; Sarfstein, Rive; LeRoith, Derek; Bruchim, Ilan                                                                                                                                                                                                                                                                                                                                                                                                                                                                            | FRONTIERS IN ONCOLOGY      | 2016 | 6  |   | 22 | 4,4 |
| Co-targeting hexokinase 2-mediated Warburg effect and ULK1-dependent autophagy suppresses tumor growth of PTEN- and TP53-deficiency-driven castration-resistant prostate cancer | Wang, Lei; Wang, Ji; Xiong, Hua; Wu, Fengxia; Lan, Tian; Zhang, Yingjie; Guo, Xiaolan; Wang, Huanan; Saleem, Mohammad; Jiang, Cheng; Lu, Junxuan; Deng, Yibin                                                                                                                                                                                                                                                                                                                                                                           | EBIOMEDICINE               | 2016 | 7  |   | 22 | 4,4 |
| Oncolytic vaccinia virus as a vector for therapeutic sodium iodide symporter gene therapy in prostate cancer                                                                    | Mansfield, D. C.; Kyula, J. N.; Rosenfelder, N.; Chao-Chu, J.; Kramer-Marek, G.; Khan, A. A.; Roulstone, V.; McLaughlin, M.; Melcher, A. A.; Vile, R. G.; Pandha, H. S.; Khoo, V.; Harrington, K. J.                                                                                                                                                                                                                                                                                                                                    | GENE THERAPY               | 2016 | 23 | 4 | 22 | 4,4 |

|                                                                                                                                                                |                                                                                                                                                                                                                                                                                                                                                                                 |                                           |      |    |    |    |      |
|----------------------------------------------------------------------------------------------------------------------------------------------------------------|---------------------------------------------------------------------------------------------------------------------------------------------------------------------------------------------------------------------------------------------------------------------------------------------------------------------------------------------------------------------------------|-------------------------------------------|------|----|----|----|------|
| CDO1 promoter methylation is associated with gene silencing and is a prognostic biomarker for biochemical recurrence-free survival in prostate cancer patients | Meller, Sebastian; Zipfel, Lisa; Gevensleben, Heidrun; Dietrich, Joern; Ellinger, Joerg; Majores, Michael; Stein, Johannes; Sailer, Verena; Jung, Maria; Kristiansen, Glen; Dietrich, Dima                                                                                                                                                                                      | EPIGENETICS                               | 2016 | 11 | 12 | 22 | 4,4  |
| The emerging role of the androgen receptor in bladder cancer                                                                                                   | Lombard, Alan P.; Mudryj, Maria                                                                                                                                                                                                                                                                                                                                                 | ENDOCRINE-RELATED CANCER                  | 2015 | 22 | 5  | 22 | 3,67 |
| Epigenetic regulation of drug metabolism and transport                                                                                                         | Peng, Lai; Zhong, Xiaobo                                                                                                                                                                                                                                                                                                                                                        | ACTA PHARMACEUTICA SINICA B               | 2015 | 5  | 2  | 22 | 3,67 |
| Organoid development in cancer genome discovery                                                                                                                | Gao, Dong; Chen, Yu                                                                                                                                                                                                                                                                                                                                                             | CURRENT OPINION IN GENETICS & DEVELOPMENT | 2015 | 30 |    | 22 | 3,67 |
| Targeting Transcription Factor Binding to DNA by Competing with DNA Binders as an Approach for Controlling Gene Expression                                     | Bouhlef, Mohamed Amine; Lambert, Melanie; David-Cordonnier, Marie-Helene                                                                                                                                                                                                                                                                                                        | CURRENT TOPICS IN MEDICINAL CHEMISTRY     | 2015 | 15 | 14 | 22 | 3,67 |
| Diagnostic associations of gene expression signatures in prostate cancer tissue                                                                                | Nguyen, Hao G.; Welty, Christopher J.; Cooperberg, Matthew R.                                                                                                                                                                                                                                                                                                                   | CURRENT OPINION IN UROLOGY                | 2015 | 25 | 1  | 22 | 3,67 |
| Linking prostate cancer cell AR heterogeneity to distinct castration and enzalutamide responses                                                                | Li, Qiuhui; Deng, Qu; Chao, Hsueh-Ping; Liu, Xin; Lu, Yue; Lin, Kevin; Liu, Bigang; Tang, Gregory W.; Zhang, Dingxiao; Tracz, Amanda; Jeter, Collene; Rycak, Kiera; Calhoun-Davis, Tammy; Huang, Jiaoti; Rubin, Mark A.; Beltran, Himisha; Shen, Jianjun; Chatta, Gurkamal; Puzanov, Igor; Mohler, James L.; Wang, Jianmin; Zhao, Ruizhe; Kirk, Jason; Chen, Xin; Tang, Dean G. | NATURE COMMUNICATIONS                     | 2018 | 9  |    | 21 | 7    |

|                                                                                                                                              |                                                                                                                                                                                                                                                                                                                                                                                                                                                                                                                               |                                                                                 |      |     |    |    |   |
|----------------------------------------------------------------------------------------------------------------------------------------------|-------------------------------------------------------------------------------------------------------------------------------------------------------------------------------------------------------------------------------------------------------------------------------------------------------------------------------------------------------------------------------------------------------------------------------------------------------------------------------------------------------------------------------|---------------------------------------------------------------------------------|------|-----|----|----|---|
| Systemic surfaceome profiling identifies target antigens for immune-based therapy in subtypes of advanced prostate cancer                    | Lee, John K.; Bangayan, Nathanael J.; Chai, Timothy; Smith, Bryan A.; Pariva, Tiffany E.; Yun, Sangwon; Vashisht, Ajay; Zhang, Qingfu; Park, Jung Wook; Corey, Eva; Huang, Jiaoti; Graeber, Thomas G.; Wohlschlegel, James; Witte, Owen N.                                                                                                                                                                                                                                                                                    | PROCEEDINGS OF THE NATIONAL ACADEMY OF SCIENCES OF THE UNITED STATES OF AMERICA | 2018 | 115 | 19 | 21 | 7 |
| Stromal Gene Expression is Predictive for Metastatic Primary Prostate Cancer                                                                 | Mo, Fan; Lin, Dong; Takhar, Mandeep; Ramnarine, Varune Rohan; Dong, Xin; Bell, Robert H.; Volik, Stanislav V.; Wang, Kendric; Xue, Hui; Wang, Yuwei; Haegert, Anne; Anderson, Shawn; Brahmabhatt, Sonal; Erho, Nicholas; Wang, Xinya; Gout, Peter W.; Morris, James; Karnes, R. Jeffrey; Den, Robert B.; Klein, Eric A.; Schaeffer, Edward M.; Ross, Ashley; Ren, Shancheng; Sahinalp, S. Cenk; Li, Yingrui; Xu, Xun; Wang, Jun; Wang, Jian; Gleave, Martin E.; Davicioni, Elai; Sun, Yinghao; Wang, Yuzhuo; Collin, Colin C. | EUROPEAN UROLOGY                                                                | 2018 | 73  | 4  | 21 | 7 |
| Intraductal/ductal histology and lymphovascular invasion are associated with germline DNA-repair gene mutations in prostate cancer           | Velho, Pedro Isaacsson; Silberstein, John L.; Markowski, Mark C.; Luo, Jun; Lotan, Tamara L.; Isaacs, William B.; Antonarakis, Emmanuel S.                                                                                                                                                                                                                                                                                                                                                                                    | PROSTATE                                                                        | 2018 | 78  | 5  | 21 | 7 |
| Principal Component Analysis with Linear and Quadratic Discriminant Analysis for Identification of Cancer Samples Based on Mass Spectrometry | Morais, Camilo L. M.; Lima, Kassio M. G.                                                                                                                                                                                                                                                                                                                                                                                                                                                                                      | JOURNAL OF THE BRAZILIAN CHEMICAL SOCIETY                                       | 2018 | 29  | 3  | 21 | 7 |
| Androgen receptor splice variants bind to constitutively open chromatin and promote abiraterone-resistant growth of prostate cancer          | He, Yundong; Lu, Ji; Ye, Zhenqing; Hao, Siyuan; Wang, Liewei; Kohli, Manish; Tindall, Donald J.; Li, Benyi; Zhu, Runzhi; Wang, Liguang; Huang, Haojie                                                                                                                                                                                                                                                                                                                                                                         | NUCLEIC ACIDS RESEARCH                                                          | 2018 | 46  | 4  | 21 | 7 |

|                                                                                                                                                      |                                                                                                                                                                                                                                                                                                                                                                                                                                                                                                                                                          |                 |      |    |    |    |      |
|------------------------------------------------------------------------------------------------------------------------------------------------------|----------------------------------------------------------------------------------------------------------------------------------------------------------------------------------------------------------------------------------------------------------------------------------------------------------------------------------------------------------------------------------------------------------------------------------------------------------------------------------------------------------------------------------------------------------|-----------------|------|----|----|----|------|
| Single-Cell RNA-seq Reveals a Subpopulation of Prostate Cancer Cells with Enhanced Cell-Cycle-Related Transcription and Attenuated Androgen Response | Horning, Aaron M.; Wang, Yao; Lin, Che-Kuang; Louie, Anna D.; Jadhav, Rohit R.; Hung, Chia-Nung; Wang, Chiou-Miin; Lin, Chun-Lin; Kirma, Nameer B.; Liss, Michael A.; Kumar, Addanki P.; Sun, Luzhe; Liu, Zhijie; Chao, Wei-Ting; Wang, Qianben; Jin, Victor X.; Chen, Chun-Liang; Huang, Tim H.-M.                                                                                                                                                                                                                                                      | CANCER RESEARCH | 2018 | 78 | 4  | 21 | 7    |
| Liquid Biopsy-Analysis of Circulating Tumor DNA (ctDNA) in Bladder Cancer                                                                            | Todenhoefer, Tilman; Struss, Werner J.; Seiler, Roland; Wyatt, Alexander William; Black, Peter C.                                                                                                                                                                                                                                                                                                                                                                                                                                                        | BLADDER CANCER  | 2018 | 4  | 1  | 21 | 7    |
| Rapid, ultra low coverage copy number profiling of cell-free DNA as a precision oncology screening strategy                                          | Hovelson, Daniel H.; Liu, Chia-Jen; Wang, Yugang; Kang, Qing; Henderson, James; Gursky, Amy; Brockman, Scott; Ramnath, Nithya; Krauss, John C.; Talpaz, Moshe; Kandarpa, Malathi; Chugh, Rashmi; Tuck, Missy; Herman, Kirk; Grasso, Catherine S.; Quist, Michael J.; Feng, Felix Y.; Haakenson, Christine; Langmore, John; Kamberov, Emmanuel; Tesmer, Tim; Husain, Hatim; Lonigro, Robert J.; Robinson, Dan; Smith, David C.; Alva, Ajai S.; Hussain, Maha H.; Chinnaiyan, Arul M.; Tewari, Muneesh; Mills, Ryan E.; Morgan, Todd M.; Tomlins, Scott A. | ONCOTARGET      | 2017 | 8  | 52 | 21 | 5,25 |
| Up-regulation of Biglycan is Associated with Poor Prognosis and PTEN Deletion in Patients with Prostate Cancer                                       | Jacobsen, Frank; Kraft, Juliane; Schroeder, Cornelia; Hube-Magg, Claudia; Kluth, Martina; Lang, Dagmar S.; Simon, Ronald; Sauter, Guido; Izbicki, Jakob R.; Clauditz, Till S.; Luebke, Andreas M.; Hinsch, Andrea; Wilczak, Waldemar; Wittmer, Corinna; Buescheck, Franziska; Hoeflmayer, Doris; Minner, Sarah; Tsourlakis, Maria Christina; Huland, Hartwig; Graefen, Markus; Budaeus, Lars; Thederan, Imke; Salomon, Georg; Schlomm, Thorsten; Melling, Nathaniel                                                                                      | NEOPLASIA       | 2017 | 19 | 9  | 21 | 5,25 |

|                                                                                                                                                |                                                                                                                                                                                                                                                                                                                                                         |                         |      |     |    |    |      |
|------------------------------------------------------------------------------------------------------------------------------------------------|---------------------------------------------------------------------------------------------------------------------------------------------------------------------------------------------------------------------------------------------------------------------------------------------------------------------------------------------------------|-------------------------|------|-----|----|----|------|
| Non-invasive urinary metabolomic profiling discriminates prostate cancer from benign prostatic hyperplasia                                     | Perez-Rambla, Clara; Puchades-Carrasco, Leonor; Garcia-Flores, Maria; Rubio-Briones, Jose; Antonio Lopez-Guerrero, Jose; Pineda-Lucena, Antonio                                                                                                                                                                                                         | METABOLOMICS            | 2017 | 13  | 5  | 21 | 5,25 |
| Acquired CYP19A1 amplification is an early specific mechanism of aromatase inhibitor resistance in ER alpha metastatic breast cancer           | Magnani, Luca; Frige, Gianmaria; Gadaleta, Raffaella Maria; Corleone, Giacomo; Fabris, Sonia; Kempe, Hermannus; Verschure, Pernette J.; Barozzi, Iros; Virchillo, Valentina; Hong, Sung-Pil; Perone, Ylenia; Saini, Massimo; Trumpp, Andreas; Viale, Giuseppe; Neri, Antonino; Ali, Simak; Colleoni, Marco Angelo; Pruneri, Giancarlo; Minucci, Saverio | NATURE GENETICS         | 2017 | 49  | 3  | 21 | 5,25 |
| A novel non-canonical Wnt signature for prostate cancer aggressiveness                                                                         | Sandsmark, Elise; Hansen, Ailin Falkmo; Selnaes, Kirsten M.; Bertilsson, Helena; Bofin, Anna M.; Wright, Alan J.; Viset, Trond; Richardsen, Elin; Drablos, Finn; Bathen, Tone F.; Tessem, May-Britt; Rye, Morten B.                                                                                                                                     | ONCOTARGET              | 2017 | 8   | 6  | 21 | 5,25 |
| The molecular underpinnings of prostate cancer: impacts on management and pathology practice                                                   | Rodrigues, Daniel Nava; Boysen, Gunther; Sumanasuriya, Semini; Seed, George; De Marzo, Angelo M.; de Bono, Johann                                                                                                                                                                                                                                       | JOURNAL OF PATHOLOGY    | 2017 | 241 | 2  | 21 | 5,25 |
| Identification and validation of potential prognostic gene biomarkers for predicting survival in patients with acute myeloid leukemia          | Huang, Rui; Liao, Xiwen; Li, Qiaochuan                                                                                                                                                                                                                                                                                                                  | ONCOTARGETS AND THERAPY | 2017 | 10  |    | 21 | 5,25 |
| MicroRNA and Transcription Factor Gene Regulatory Network Analysis Reveals Key Regulatory Elements Associated with Prostate Cancer Progression | Sadeghi, Mehdi; Ranjbar, Bijan; Ganjalikhany, Mohamad Reza; Khan, Faiz M.; Schmitz, Ulf; Wolkenhauer, Olaf; Gupta, Shailendra K.                                                                                                                                                                                                                        | PLOS ONE                | 2016 | 11  | 12 | 21 | 4,2  |

|                                                                                                                                                            |                                                                                                                                                                                                                                                                                                                                                                                                                                                                                                                                                                                       |                                             |      |    |    |    |     |
|------------------------------------------------------------------------------------------------------------------------------------------------------------|---------------------------------------------------------------------------------------------------------------------------------------------------------------------------------------------------------------------------------------------------------------------------------------------------------------------------------------------------------------------------------------------------------------------------------------------------------------------------------------------------------------------------------------------------------------------------------------|---------------------------------------------|------|----|----|----|-----|
| Emergence of the Noncoding Cancer Genome: A Target of Genetic and Epigenetic Alterations                                                                   | Zhou, Stanley; Treloar, Aislinn E.; Lupien, Mathieu                                                                                                                                                                                                                                                                                                                                                                                                                                                                                                                                   | CANCER DISCOVERY                            | 2016 | 6  | 11 | 21 | 4,2 |
| Pharmacogenetic Discovery in CALGB (Alliance) 90401 and Mechanistic Validation of a VAC14 Polymorphism that Increases Risk of Docetaxel-Induced Neuropathy | Hertz, Daniel L.; Owzar, Kouros; Lessans, Sherrie; Wing, Claudia; Jiang, Chen; Kelly, William Kevin; Patel, Jai; Halabi, Susan; Furukawa, Yoichi; Wheeler, Heather E.; Sibley, Alexander B.; Lassiter, Cameron; Weisman, Lois; Watson, Dorothy; Krens, Stefanie D.; Mulkey, Flora; Renn, Cynthia L.; Small, Eric J.; Febbo, Phillip G.; Shterev, Ivo; Kroetz, Deanna L.; Friedman, Paula N.; Mahoney, John F.; Carducci, Michael A.; Kelley, Michael J.; Nakamura, Yusuke; Kubo, Michiaki; Dorsey, Susan G.; Dolan, M. Eileen; Morris, Michael J.; Ratain, Mark J.; McLeod, Howard L. | CLINICAL CANCER RESEARCH                    | 2016 | 22 | 19 | 21 | 4,2 |
| Importance of Estrogenic Signaling and Its Mediated Receptors in Prostate Cancer                                                                           | Lau, Kin-Mang; To, Ka-Fai                                                                                                                                                                                                                                                                                                                                                                                                                                                                                                                                                             | INTERNATIONAL JOURNAL OF MOLECULAR SCIENCES | 2016 | 17 | 9  | 21 | 4,2 |
| The Early Effects of Rapid Androgen Deprivation on Human Prostate Cancer                                                                                   | Shaw, Greg L.; Whitaker, Hayley; Corcoran, Marie; Dunning, Mark J.; Luxton, Hayley; Kay, Jonathan; Massie, Charlie E.; Miller, Jodi L.; Lamb, Alastair D.; Ross-Adams, Helen; Russell, Roslin; Nelson, Adam W.; Eldridge, Matthew D.; Lynch, Andrew G.; Ramos-Montoya, Antonio; Mills, Ian G.; Taylor, Angela E.; Arlt, Wiebke; Shah, Nimish; Warren, Anne Y.; Neal, David E.                                                                                                                                                                                                         | EUROPEAN UROLOGY                            | 2016 | 70 | 2  | 21 | 4,2 |
| Whole-genome DNA methylation and hydroxymethylation profiling for HBV-related hepatocellular carcinoma                                                     | Ye, Chao; Tao, Ran; Cao, Qingyi; Zhu, Danhua; Wang, Yini; Wang, Jie; Lu, Juan; Chen, Ermei; Li, Lanjuan                                                                                                                                                                                                                                                                                                                                                                                                                                                                               | INTERNATIONAL JOURNAL OF ONCOLOGY           | 2016 | 49 | 2  | 21 | 4,2 |

|                                                                                                                                        |                                                                                                                                                                                                                                                                                                                                             |                                        |      |     |    |    |     |
|----------------------------------------------------------------------------------------------------------------------------------------|---------------------------------------------------------------------------------------------------------------------------------------------------------------------------------------------------------------------------------------------------------------------------------------------------------------------------------------------|----------------------------------------|------|-----|----|----|-----|
| Complex-I Alteration and Enhanced Mitochondrial Fusion Are Associated With Prostate Cancer Progression                                 | Phillely, Julie V.; Kannan, Anbarasu; Qin, Wenyi; Sauter, Edward R.; Ikebe, Mitsuo; Hertweck, Kate L.; Troyer, Dean A.; Semmes, Oliver J.; Dasgupta, Santanu                                                                                                                                                                                | JOURNAL OF CELLULAR PHYSIOLOGY         | 2016 | 231 | 6  | 21 | 4,2 |
| Integrated analysis of the prostate cancer small-nucleolar transcriptome reveals SNORA55 as a driver of prostate cancer progression    | Crea, Francesco; Quagliata, Luca; Michael, Agnieszka; Liu, Hui Hsuan; Frumento, Paolo; Azad, Arun A.; Xue, Hui; Pikor, Larissa; Watahiki, Akira; Morant, Rudolf; Eppenberger-Castori, Serenella; Wang, Yuwei; Parolia, Abhijit; Lennox, Kim A.; Lam, Wan L.; Gleave, Martin; Chi, Kim N.; Pandha, Hardev; Wang, Yuzhuo; Helgason, Cheryl D. | MOLECULAR ONCOLOGY                     | 2016 | 10  | 5  | 21 | 4,2 |
| Hunting the genes in male-pattern alopecia: how important are they, how close are we and what will they tell us?                       | Heilmann-Heimbach, Stefanie; Hochfeld, Lara M.; Paus, Ralf; Noethen, Markus M.                                                                                                                                                                                                                                                              | EXPERIMENTAL DERMATOLOGY               | 2016 | 25  | 4  | 21 | 4,2 |
| The UGT2B28 Sex-steroid Inactivation Pathway Is a Regulator of Steroidogenesis and Modifies the Risk of Prostate Cancer Progression    | Belledant, Anais; Hovington, Helene; Garcia, Luciana; Caron, Patrick; Brisson, Herve; Villeneuve, Lyne; Simonyan, David; Tetu, Bernard; Fradet, Yves; Lacombe, Louis; Guillemette, Chantal; Levesque, Eric                                                                                                                                  | EUROPEAN UROLOGY                       | 2016 | 69  | 4  | 21 | 4,2 |
| SRM/MRM targeted proteomics as a tool for biomarker validation and absolute quantification in human urine                              | Mermelekas, George; Vlahou, Antonia; Zoidakis, Jerome                                                                                                                                                                                                                                                                                       | EXPERT REVIEW OF MOLECULAR DIAGNOSTICS | 2015 | 15  | 11 | 21 | 3,5 |
| Incorporating Genetic Biomarkers into Predictive Models of Normal Tissue Toxicity                                                      | Barnett, G. C.; Kerns, S. L.; Noble, D. J.; Dunning, A. M.; West, C. M. L.; Burnet, N. G.                                                                                                                                                                                                                                                   | CLINICAL ONCOLOGY                      | 2015 | 27  | 10 | 21 | 3,5 |
| MicroRNA-205 inhibits cancer cell migration and invasion via modulation of centromere protein F regulating pathways in prostate cancer | Nishikawa, Rika; Goto, Yusuke; Kurozumi, Akira; Matsushita, Ryosuke; Enokida, Hideki; Kojima, Satoko; Naya, Yukio; Nakagawa, Masayuki; Ichikawa, Tomohiko; Seki, Naohiko                                                                                                                                                                    | INTERNATIONAL JOURNAL OF UROLOGY       | 2015 | 22  | 9  | 21 | 3,5 |
| Annexin A4 and cancer                                                                                                                  | Wei, Bin; Guo, Chunmei; Liu, Shuqing; Sun, Ming-Zhong                                                                                                                                                                                                                                                                                       | CLINICA CHIMICA ACTA                   | 2015 | 447 |    | 21 | 3,5 |



|                                                                                                                                                                                                       |                                                                                                                                                                                                                                                                      |                                     |      |     |   |    |     |
|-------------------------------------------------------------------------------------------------------------------------------------------------------------------------------------------------------|----------------------------------------------------------------------------------------------------------------------------------------------------------------------------------------------------------------------------------------------------------------------|-------------------------------------|------|-----|---|----|-----|
| Downregulation of EphA5 by promoter methylation in human prostate cancer                                                                                                                              | Li, Shibao; Zhu, Yingfeng; Ma, Chunguang; Qiu, Zhenhua; Zhang, Xinju; Kang, Zhihua; Wu, Zhiyuan; Wang, Hua; Xu, Xiao; Zhang, Hu; Ren, Guoqiang; Tang, Jianmin; Li, Xiangyu; Guan, Ming                                                                               | BMC CANCER                          | 2015 | 15  |   | 21 | 3,5 |
| Plumbagin elicits differential proteomic responses mainly involving cell cycle, apoptosis, autophagy, and epithelial-to-mesenchymal transition pathways in human prostate cancer PC-3 and DU145 cells | Qiu, Jia-Xuan; Zhou, Zhi-Wei; He, Zhi-Xu; Zhao, Ruan Jin; Zhang, Xueji; Yang, Lun; Zhou, Shu-Feng; Mao, Zong-Fu                                                                                                                                                      | DRUG DESIGN DEVELOPMENT AND THERAPY | 2015 | 9   |   | 21 | 3,5 |
| Targeting FOXA1-mediated repression of TGF-beta signaling suppresses castration-resistant prostate cancer progression                                                                                 | Song, Bing; Park, Su-Hong; Zhao, Jonathan C.; Fong, Ka-Wing; Li, Shangze; Lee, Yongik; Yang, Yeqing A.; Sridhar, Subhasree; Lu, Xiaodong; Abdulkadir, Sarki A.; Vessella, Robert L.; Morrissey, Colm; Kuzel, Timothy M.; Catalona, William; Yang, Ximing; Yu, Jindan | JOURNAL OF CLINICAL INVESTIGATION   | 2019 | 129 | 2 | 20 | 10  |

|                                                                                                                                   |                                                                                                                                                                                                                                                                                                                                                                                                                                                                                                                                                                                                                                                                                                                                                                                                                                                                                                                                                    |                    |      |    |   |    |      |
|-----------------------------------------------------------------------------------------------------------------------------------|----------------------------------------------------------------------------------------------------------------------------------------------------------------------------------------------------------------------------------------------------------------------------------------------------------------------------------------------------------------------------------------------------------------------------------------------------------------------------------------------------------------------------------------------------------------------------------------------------------------------------------------------------------------------------------------------------------------------------------------------------------------------------------------------------------------------------------------------------------------------------------------------------------------------------------------------------|--------------------|------|----|---|----|------|
| Patient-derived Models of Abiraterone- and Enzalutamide-resistant Prostate Cancer Reveal Sensitivity to Ribosome-directed Therapy | Lawrence, Mitchell G.; Obinata, Daisuke; Sandhu, Shahneen; Selth, Luke A.; Wong, Stephen Q.; Porter, Laura H.; Lister, Natalie; Pook, David; Pezaro, Carmel J.; Goode, David L.; Rebello, Richard J.; Clark, Ashlee K.; Papargiris, Melissa; Van Gramberg, Jenna; Hanson, Adrienne R.; Banks, Patricia; Wang, Hong; Niranjana, Birunthi; Keerthikumar, Shivakumar; Hedwards, Shelley; Huglo, Alisee; Yang, Rendong; Henzler, Christine; Li, Yingming; Lopez-Campos, Fernando; Castro, Elena; Toivanen, Roxanne; Azad, Arun; Bolton, Damien; Goad, Jeremy; Grummet, Jeremy; Harewood, Laurence; Kourambas, John; Lawrentschuk, Nathan; Moon, Daniel; Murphy, Declan G.; Sengupta, Shomik; Snow, Ross; Thorne, Heather; Mitchell, Catherine; Pedersen, John; Clouston, David; Norden, Sam; Ryan, Andrew; Dehm, Scott M.; Tilley, Wayne D.; Pearson, Richard B.; Hannan, Ross D.; Frydenberg, Mark; Furic, Luc; Taylor, Renea A.; Risbridger, Gail P. | EUROPEAN UROLOGY   | 2018 | 74 | 5 | 20 | 6,67 |
| A Plasma Biomarker Panel of Four MicroRNAs for the Diagnosis of Prostate Cancer                                                   | Matin, Farhana; Jeet, Varinder; Moya, Leire; Selth, Luke A.; Chambers, Suzanne; Clements, Judith A.; Batra, Jyotsna                                                                                                                                                                                                                                                                                                                                                                                                                                                                                                                                                                                                                                                                                                                                                                                                                                | SCIENTIFIC REPORTS | 2018 | 8  |   | 20 | 6,67 |
| Tamoxifen Resistance in Breast Cancer Is Regulated by the EZH2-ER alpha-GREB1 Transcriptional Axis                                | Wu, Yanming; Zhang, Zhao; Cenciarini, Mauro E.; Proietti, Cecilia J.; Amasino, Matias; Hong, Tao; Yang, Mei; Liao, Yiji; Chiang, Huai-Chin; Kaklamani, Virginia G.; Jeselsohn, Rinath; Vadlamudi, Ratna K.; Huang, Tim Hui-Ming; Li, Rong; De Angelis, Carmine; Fu, Xiaoyong; Elizalde, Patricia V.; Schiff, Rachel; Brown, Myles; Xu, Kexin                                                                                                                                                                                                                                                                                                                                                                                                                                                                                                                                                                                                       | CANCER RESEARCH    | 2018 | 78 | 3 | 20 | 6,67 |

|                                                                                                                                                                        |                                                                                                                                                                                                                                                                                                                                                                                                        |                          |      |    |    |    |      |
|------------------------------------------------------------------------------------------------------------------------------------------------------------------------|--------------------------------------------------------------------------------------------------------------------------------------------------------------------------------------------------------------------------------------------------------------------------------------------------------------------------------------------------------------------------------------------------------|--------------------------|------|----|----|----|------|
| Validation of a Genomic Risk Classifier to Predict Prostate Cancer-specific Mortality in Men with Adverse Pathologic Features                                          | Karnes, R. Jeffrey; Choeurng, Voleak; Ross, Ashley E.; Schaeffer, Edward M.; Klein, Eric A.; Freedland, Stephen J.; Erho, Nicholas; Yousefi, Kasra; Takhar, Mandeep; Davicioni, Elai; Cooperberg, Matthew R.; Trock, Bruce J.                                                                                                                                                                          | EUROPEAN UROLOGY         | 2018 | 73 | 2  | 20 | 6,67 |
| Metabolomic estimation of the diagnosis of hepatocellular carcinoma based on ultrahigh performance liquid chromatography coupled with time-of-flight mass spectrometry | Li, Yuan-Feng; Qiu, Shi; Gao, Li-Juan; Zhang, Ai-Hua                                                                                                                                                                                                                                                                                                                                                   | RSC ADVANCES             | 2018 | 8  | 17 | 20 | 6,67 |
| Aberrant Activation of a Gastrointestinal Transcriptional Circuit in Prostate Cancer Mediates Castration Resistance                                                    | Shukla, Shipra; Cyrtta, Joanna; Murphy, Devan A.; Walczak, Edward G.; Ran, Leili; Agrawal, Praveen; Xie, Yuanyuan; Chen, Yuedan; Wang, Shangqian; Zhan, Yu; Li, Dan; Wong, Elissa W. P.; Sboner, Andrea; Beltran, Himisha; Mosquera, Juan Miguel; Sher, Jessica; Cao, Zhen; Wongvipat, John; Koche, Richard P.; Gopalan, Anuradha; Zheng, Deyou; Rubin, Mark A.; Scher, Howard I.; Chi, Ping; Chen, Yu | CANCER CELL              | 2017 | 32 | 6  | 20 | 5    |
| Biomarker significance of plasma and tumor miR-21, miR-221, and miR-106a in osteosarcoma                                                                               | Nakka, Manjula; Allen-Rhoades, Wendy; Li, Yiting; Kelly, Aaron J.; Shen, Jianhe; Taylor, Aaron M.; Barkauskas, Donald A.; Yustein, Jason T.; Andrulis, Irene L.; Wunder, Jay S.; Gorlick, Richard; Meltzer, Paul S.; Lau, Ching C.; Man, Tsz-Kwong                                                                                                                                                     | ONCOTARGET               | 2017 | 8  | 57 | 20 | 5    |
| The Novel Association of Circulating Tumor Cells and Circulating Megakaryocytes with Prostate Cancer Prognosis                                                         | Xu, Lei; Mao, Xueying; Guo, Tianyu; Chan, Pui Ying; Shaw, Greg; Hines, John; Stankiewicz, Elzbieta; Wang, Yuqin; Oliver, R. Tim D.; Ahmad, Amar Sabri; Berney, Daniel; Shamash, Jonathan; Lu, Yong-Jie                                                                                                                                                                                                 | CLINICAL CANCER RESEARCH | 2017 | 23 | 17 | 20 | 5    |

|                                                                                                                                                                                     |                                                                                                                                                                                                                                                                                                        |                                        |      |     |    |    |   |
|-------------------------------------------------------------------------------------------------------------------------------------------------------------------------------------|--------------------------------------------------------------------------------------------------------------------------------------------------------------------------------------------------------------------------------------------------------------------------------------------------------|----------------------------------------|------|-----|----|----|---|
| Novel Androgen Receptor Coregulator GRHL2 Exerts Both Oncogenic and Antimetastatic Functions in Prostate Cancer                                                                     | Paltoglou, Steve; Das, Rajdeep; Townley, Scott L.; Hickey, Theresa E.; Tarulli, Gerard A.; Coutinho, Isabel; Fernandes, Rayzel; Hanson, Adrienne R.; Denis, Iza; Carroll, Jason S.; Dehm, Scott M.; Raj, Ganesh V.; Plymate, Stephen R.; Tilley, Wayne D.; Selth, Luke A.                              | CANCER RESEARCH                        | 2017 | 77  | 13 | 20 | 5 |
| Demographic, lifestyle, and genetic determinants of circulating concentrations of 25-hydroxyvitamin D and vitamin D-binding protein in African American and European American women | Yao, Song; Hong, Chi-Chen; Bandera, Elisa V.; Zhu, Qianqian; Liu, Song; Cheng, Ting-Yuan David; Zirpoli, Gary; Haddad, Stephen A.; Lunetta, Kathryn L.; Ruiz-Narvaez, Edward A.; McCann, Susan E.; Troester, Melissa A.; Rosenberg, Lynn; Palmer, Julie R.; Olshan, Andrew F.; Ambrosone, Christine B. | AMERICAN JOURNAL OF CLINICAL NUTRITION | 2017 | 105 | 6  | 20 | 5 |
| Chromosomal Instability in Cell-Free DNA as a Highly Specific Biomarker for Detection of Ovarian Cancer in Women with Adnexal Masses                                                | Vanderstichele, Adriaan; Busschaert, Pieter; Smeets, Dominiek; Landolfo, Chiara; Van Nieuwenhuysen, Els; Leunen, Karin; Neven, Patrick; Amant, Frederic; Mahner, Sven; Braicu, Elena Ioana; Zeilinger, Robert; Coosemans, An; Timmerman, Dirk; Lambrechts, Diether; Vergote, Ignace                    | CLINICAL CANCER RESEARCH               | 2017 | 23  | 9  | 20 | 5 |
| Genome-wide DNA methylation measurements in prostate tissues uncovers novel prostate cancer diagnostic biomarkers and transcription factor binding patterns                         | Kirby, Marie K.; Ramaker, Ryne C.; Roberts, Brian S.; Lasseigne, Brittany N.; Gunther, David S.; Burwell, Todd C.; Davis, Nicholas S.; Gulzar, Zulficrar G.; Absher, Devin M.; Cooper, Sara J.; Brooks, James D.; Myers, Richard M.                                                                    | BMC CANCER                             | 2017 | 17  |    | 20 | 5 |
| Role of steroid receptor and coregulator mutations in hormone-dependent cancers                                                                                                     | Groner, Anna C.; Brown, Myles                                                                                                                                                                                                                                                                          | JOURNAL OF CLINICAL INVESTIGATION      | 2017 | 127 | 4  | 20 | 5 |
| Circulating tumor cells capture disease evolution in advanced prostate cancer                                                                                                       | Lack, Justin; Gillard, Marc; Cam, Maggie; Paner, Gladell P.; VanderWeele, David J.                                                                                                                                                                                                                     | JOURNAL OF TRANSLATIONAL MEDICINE      | 2017 | 15  |    | 20 | 5 |

|                                                                                                                                                                |                                                                                                                                                                                                                                                                             |                              |      |     |    |    |   |
|----------------------------------------------------------------------------------------------------------------------------------------------------------------|-----------------------------------------------------------------------------------------------------------------------------------------------------------------------------------------------------------------------------------------------------------------------------|------------------------------|------|-----|----|----|---|
| Integration of VDR genome wide binding and GWAS genetic variation data reveals co-occurrence of VDR and NF-kappa B binding that is linked to immune phenotypes | Singh, Prashant K.; van den Berg, Patrick R.; Long, Mark D.; Vreugdenhil, Angie; Grieshaber, Laurie; Ochs-Balcom, Heather M.; Wang, Jianmin; Delcambre, Sylvie; Heikkinen, Sami; Carlberg, Carsten; Campbell, Moray J.; Sucheston-Campbell, Lara E.                         | BMC GENOMICS                 | 2017 | 18  |    | 20 | 5 |
| Therapeutic Targeting of Epithelial Plasticity Programs: Focus on the Epithelial-Mesenchymal Transition                                                        | Malek, Reem; Wang, Hailun; Kekoa, Taparra; Tran, Phuoc T.                                                                                                                                                                                                                   | CELLS TISSUES ORGANS         | 2017 | 203 | 2  | 20 | 5 |
| Detection of aggressive prostate cancer associated glycoproteins in urine using glycoproteomics and mass spectrometry                                          | Jia, Xingwang; Chen, Jing; Sun, Shisheng; Yang, Weiming; Yang, Shuang; Shah, Punit; Hoti, Naseruddin; Veltri, Bob; Zhang, Hui                                                                                                                                               | PROTEOMICS                   | 2016 | 16  | 23 | 20 | 4 |
| Antibody-Array-Based Proteomic Screening of Serum Markers in Systemic Lupus Erythematosus: A Discovery Study                                                   | Wu, Tianfu; Ding, Huihua; Han, Jie; Arriens, Cristina; Wei, Chungwen; Han, Weilu; Pedroza, Claudia; Jiang, Shan; Anolik, Jennifer; Petri, Michelle; Sanz, Ignacio; Saxena, Ramesh; Mohan, Chandra                                                                           | JOURNAL OF PROTEOME RESEARCH | 2016 | 15  | 7  | 20 | 4 |
| The Landscape of Prognostic Outlier Genes in High-Risk Prostate Cancer                                                                                         | Zhao, Shuang G.; Evans, Joseph R.; Kothari, Vishal; Sun, Grace; Larm, Ashley; Mondine, Victor; Schaeffer, Edward M.; Ross, Ashley E.; Klein, Eric A.; Den, Robert B.; Dicker, Adam P.; Karnes, R. Jeffrey; Erho, Nicholas; Nguyen, Paul L.; Davicioni, Elai; Feng, Felix Y. | CLINICAL CANCER RESEARCH     | 2016 | 22  | 7  | 20 | 4 |
| Development of Castration Resistant Prostate Cancer can be Predicted by a DNA Hypermethylation Profile                                                         | Angulo, Javier C.; Andres, Guillermo; Ashour, Nadia; Sanchez-Chapado, Manuel; Lopez, Jose I.; Ropero, Santiago                                                                                                                                                              | JOURNAL OF UROLOGY           | 2016 | 195 | 3  | 20 | 4 |
| Unravelling the transcriptomic landscape of the major phase II UDP-glucuronosyltransferase drug metabolizing pathway using targeted RNA sequencing             | Tourancheau, A.; Margaillan, G.; Rouleau, M.; Gilbert, I.; Villeneuve, L.; Levesque, E.; Droit, A.; Guillemette, C.                                                                                                                                                         | PHARMACOGENOMICS JOURNAL     | 2016 | 16  | 1  | 20 | 4 |

|                                                                                                                                               |                                                                                                                                                                                                                                                                                                                                            |                                      |      |     |    |    |      |
|-----------------------------------------------------------------------------------------------------------------------------------------------|--------------------------------------------------------------------------------------------------------------------------------------------------------------------------------------------------------------------------------------------------------------------------------------------------------------------------------------------|--------------------------------------|------|-----|----|----|------|
| Targeting Androgen/Estrogen Receptors Crosstalk in Cancer                                                                                     | Karamouzis, Michalis V.; Papavassiliou, Kostas A.; Adamopoulos, Christos; Papavassiliou, Athanasios G.                                                                                                                                                                                                                                     | TRENDS IN CANCER                     | 2016 | 2   | 1  | 20 | 4    |
| Differentially Expressed Genes and Signature Pathways of Human Prostate Cancer                                                                | Myers, Jennifer S.; von Lersner, Ariana K.; Robbins, Charles J.; Sang, Qing-Xiang Amy                                                                                                                                                                                                                                                      | PLOS ONE                             | 2015 | 10  | 12 | 20 | 3,33 |
| Methylseleninic acid promotes antitumour effects via nuclear FOXO3a translocation through Akt inhibition                                      | Tarrado-Castellarnau, Miriam; Cortes, Roldan; Zanuy, Miriam; Tarrago-Celada, Josep; Polat, Ibrahim H.; Hill, Richard; Fan, Teresa W. M.; Link, Wolfgang; Cascante, Marta                                                                                                                                                                   | PHARMACOLOGICAL RESEARCH             | 2015 | 102 |    | 20 | 3,33 |
| Hormone-related pathways and risk of breast cancer subtypes in African American women                                                         | Haddad, Stephen A.; Lunetta, Kathryn L.; Ruiz-Narvaez, Edward A.; Bensen, Jeannette T.; Hong, Chi-Chen; Sucheston-Campbell, Lara E.; Yao, Song; Bandera, Elisa V.; Rosenberg, Lynn; Haiman, Christopher A.; Troester, Melissa A.; Ambrosone, Christine B.; Palmer, Julie R.                                                                | BREAST CANCER RESEARCH AND TREATMENT | 2015 | 154 | 1  | 20 | 3,33 |
| FOXA1 regulates androgen receptor variant activity in models of castrate-resistant prostate cancer                                            | Jones, Dominic; Wade, Mark; Nakjang, Sirintra; Chaytor, Lewis; Grey, James; Robson, Craig N.; Gaughan, Luke                                                                                                                                                                                                                                | ONCOTARGET                           | 2015 | 6   | 30 | 20 | 3,33 |
| Genomic deletion of chromosome 12p is an independent prognostic marker in prostate cancer                                                     | Kluth, Martina; Ahrary, Ramin; Hube-Magg, Claudia; Ahmed, Malik; Volta, Heinke; Schwemin, Catina; Steurer, Stefan; Wittmer, Corinna; Wilczak, Waldemar; Krech, Eike Burandt Till; Adam, Meike; Michl, Uwe; Heinzer, Hans; Salomon, Georg; Graefen, Markus; Koop, Christina; Minner, Sarah; Simon, Ronald; Sauter, Guido; Schlomm, Thorsten | ONCOTARGET                           | 2015 | 6   | 29 | 20 | 3,33 |
| gamma H2AX assay in ex vivo irradiated tumour specimens: A novel Method to determine tumour radiation sensitivity in patient-derived material | Menegakis, Apostolos; von Neubeck, Claere; Yaromina, Ala; Thames, Howard; Hering, Sandra; Hennenlotter, Joerg; Scharpf, Marcus; Noell, Susan; Krause, Mechthild; Zips, Daniel; Baumann, Michael                                                                                                                                            | RADIOTHERAPY AND ONCOLOGY            | 2015 | 116 | 3  | 20 | 3,33 |

|                                                                                                                                                                      |                                                                                                                                                                                                                                                                                                                                                                                                                                                                                                                                                                                                                                                               |                                             |      |    |   |    |      |
|----------------------------------------------------------------------------------------------------------------------------------------------------------------------|---------------------------------------------------------------------------------------------------------------------------------------------------------------------------------------------------------------------------------------------------------------------------------------------------------------------------------------------------------------------------------------------------------------------------------------------------------------------------------------------------------------------------------------------------------------------------------------------------------------------------------------------------------------|---------------------------------------------|------|----|---|----|------|
| Estrogen receptor alpha drives proliferation in PTEN-deficient prostate carcinoma by stimulating survival signaling, MYC expression and altering glucose sensitivity | Takizawa, Itsuhiro; Lawrence, Mitchell G.; Balanathan, Preetika; Rebello, Richard; Pearson, Helen B.; Garg, Elika; Pedersen, John; Pouliot, Normand; Nadon, Robert; Watt, Matthew J.; Taylor, Renea A.; Humbert, Patrick; Topisirovic, Ivan; Larsson, Ola; Risbridger, Gail P.; Furic, Luc                                                                                                                                                                                                                                                                                                                                                                    | ONCOTARGET                                  | 2015 | 6  | 2 | 20 | 3,33 |
| Identifying Actionable Targets through Integrative Analyses of GEM Model and Human Prostate Cancer Genomic Profiling                                                 | Wanjala, Jackie; Taylor, Barry S.; Chapinski, Caren; Hieronymus, Haley; Wongvipat, John; Chen, Yu; Nanjangud, Gouri J.; Schultz, Nikolaus; Xie, Yingqiu; Liu, Shenji; Lu, Wenfu; Yang, Qing; Sander, Chris; Chen, Zhenbang; Sawyers, Charles L.; Carver, Brett S.                                                                                                                                                                                                                                                                                                                                                                                             | MOLECULAR CANCER THERAPEUTICS               | 2015 | 14 | 1 | 20 | 3,33 |
| Long non-coding RNAs as monitoring tools and therapeutic targets in breast cancer                                                                                    | Luisa Pecero, Ma; Salvador-Bofill, Javier; Molina-Pinelo, Sonia                                                                                                                                                                                                                                                                                                                                                                                                                                                                                                                                                                                               | CELLULAR ONCOLOGY                           | 2019 | 42 | 1 | 19 | 9,5  |
| ONECUT2 is a driver of neuroendocrine prostate cancer                                                                                                                | Guo, Haiyang; Ci, Xinpei; Ahmed, Musaddeque; Hua, Junjie Tony; Soares, Fraser; Lin, Dong; Puca, Loredana; Vosoughi, Aram; Xue, Hui; Li, Estelle; Su, Peiran; Chen, Sujun; Tran Nguyen; Liang, Yi; Zhang, Yuzhe; Xu, Xin; Xu, Jing; Sheahan, Anjali V.; Ba-Alawi, Wail; Zhang, Si; Mahamud, Osman; Vellanki, Ravi N.; Gleave, Martin; Bristow, Robert G.; Haibe-Kains, Benjamin; Poirier, John T.; Rudin, Charles M.; Tsao, Ming-Sound; Wouters, Bradley G.; Fazli, Ladan; Feng, Felix Y.; Ellis, Leigh; van der Kwast, Theo; Berlin, Alejandro; Koritzinsky, Marianne; Boutros, Paul C.; Zoubeidi, Amina; Beltran, Himisha; Wang, Yuzhuo; He, Housheng Hansen | NATURE COMMUNICATIONS                       | 2019 | 10 |   | 19 | 9,5  |
| Therapeutic Inhibition of Myc in Cancer. Structural Bases and Computer-Aided Drug Discovery Approaches                                                               | Carabet, Lavinia A.; Rennie, Paul S.; Cherkasov, Artem                                                                                                                                                                                                                                                                                                                                                                                                                                                                                                                                                                                                        | INTERNATIONAL JOURNAL OF MOLECULAR SCIENCES | 2019 | 20 | 1 | 19 | 9,5  |

|                                                                                            |                                                                                                                                                                                                                                                                                                                                                                                                                                                                                                     |                                |      |     |   |    |     |
|--------------------------------------------------------------------------------------------|-----------------------------------------------------------------------------------------------------------------------------------------------------------------------------------------------------------------------------------------------------------------------------------------------------------------------------------------------------------------------------------------------------------------------------------------------------------------------------------------------------|--------------------------------|------|-----|---|----|-----|
| Merging new-age biomarkers and nanodiagnosics for precision prostate cancer management     | Koo, Kevin M.; Mainwaring, Paul N.; Tomlins, Scott A.; Trau, Matt                                                                                                                                                                                                                                                                                                                                                                                                                                   | NATURE REVIEWS UROLOGY         | 2019 | 16  | 5 | 18 | 9   |
| PTEN as a Prognostic/Predictive Biomarker in Cancer: An Unfulfilled Promise?               | Bazzichetto, Chiara; Conciatori, Fabiana; Pallocca, Matteo; Falcone, Italia; Fanciulli, Maurizio; Cognetti, Francesco; Milella, Michele; Ciuffreda, Ludovica                                                                                                                                                                                                                                                                                                                                        | CANCERS                        | 2019 | 11  | 4 | 18 | 9   |
| High miR-454-3p expression predicts poor prognosis in hepatocellular carcinoma             | Li, Yanqing; Jiao, Yan; Fu, Zhuo; Luo, Zhangping; Su, Jing; Li, Yang                                                                                                                                                                                                                                                                                                                                                                                                                                | CANCER MANAGEMENT AND RESEARCH | 2019 | 11  |   | 18 | 9   |
| Prostate-specific Membrane Antigen Heterogeneity and DNA Repair Defects in Prostate Cancer | Paschalis, Alec; Sheehan, Beshara; Riisnaes, Ruth; Rodrigues, Daniel Nava; Gurel, Bora; Bertan, Claudia; Ferreira, Ana; Lambros, Maryou B. K.; Seed, George; Yuan, Wei; Dolling, David; Welte, Jon C.; Neeb, Antje; Sumanasuriya, Semini; Rescigno, Pasquale; Bianchini, Diletta; Tunariu, Nina; Carreira, Suzanne; Sharp, Adam; Oyen, Wim; de Bono, Johann S.                                                                                                                                      | EUROPEAN UROLOGY               | 2019 | 76  | 4 | 17 | 8,5 |
| Exosomes, new biomarkers in early cancer detection                                         | Jalalian, Seyed Hamid; Ramezani, Mohammad; Jalalian, Seyed Ali; Abnous, Khalil; Taghdisi, Seyed Mohammad                                                                                                                                                                                                                                                                                                                                                                                            | ANALYTICAL BIOCHEMISTRY        | 2019 | 571 |   | 17 | 8,5 |
| The Proteogenomic Landscape of Curable Prostate Cancer                                     | Sinha, Ankit; Huang, Vincent; Livingstone, Julie; Wang, Jenny; Fox, Natalie S.; Kurganovs, Natalie; Ignatchenko, Vladimir; Fritsch, Katharina; Donmez, Nilgun; Heisler, Lawrence E.; Shiah, Yu-Jia; Yao, Cindy Q.; Alfaro, Javier A.; Volik, Stas; Lapuk, Anna; Fraser, Michael; Kron, Ken; Murison, Alex; Lupien, Mathieu; Sahinalp, Cenk; Collins, Colin C.; Tetu, Bernard; Masoomian, Mehdi; Berman, David M.; van der Kwast, Theodorus; Bristow, Robert G.; Kislinger, Thomas; Boutros, Paul C. | CANCER CELL                    | 2019 | 35  | 3 | 17 | 8,5 |



|                                                                                                                               |                                                                                                                                                                                                                                                                                                                                                           |                                   |      |     |    |    |     |
|-------------------------------------------------------------------------------------------------------------------------------|-----------------------------------------------------------------------------------------------------------------------------------------------------------------------------------------------------------------------------------------------------------------------------------------------------------------------------------------------------------|-----------------------------------|------|-----|----|----|-----|
| The Long Noncoding RNA TTTY15, Which Is Located on the Y Chromosome, Promotes Prostate Cancer Progression by Sponging let-7   | Xiao, Guang'an; Yao, Jingjing; Kong, Depei; Ye, Chen; Chen, Rui; Li, Li; Zeng, Tao; Wang, Liujun; Zhang, Wei; Shi, Xiaolei; Zhou, Tie; Li, Jing; Wang, Yue; Xu, Chuan Liang; Jiang, Junfeng; Sun, Yinghao                                                                                                                                                 | EUROPEAN UROLOGY                  | 2019 | 76  | 3  | 16 | 8   |
| Identification of the perturbed metabolic pathways associating with prostate cancer cells and anticancer affects of obacunone | Xie, Jing; Zhang, Ai-hua; Qiu, Shi; Zhang, Tian-lei; Li, Xian-na; Yan, Guang-li; Sun, Hui; Liu, Liang; Wang, Xi-jun                                                                                                                                                                                                                                       | JOURNAL OF PROTEOMICS             | 2019 | 206 |    | 16 | 8   |
| Genome-wide CRISPR screens reveal synthetic lethality of RNASEH2 deficiency and ATR inhibition                                | Wang, Chao; Wang, Gang; Feng, Xu; Shepherd, Peter; Zhang, Jie; Tang, Mengfan; Chen, Zhen; Srivastava, Mrinal; McLaughlin, Megan E.; Navone, Nora M.; Hart, Glen Traver; Chen, Junjie                                                                                                                                                                      | ONCOGENE                          | 2019 | 38  | 14 | 16 | 8   |
| The Microbiome and Genitourinary Cancer: A Collaborative Review                                                               | Markowski, Mark C.; Boorjian, Stephen A.; Burton, Jeremy P.; Hahn, Noah M.; Ingersoll, Molly A.; Vareki, Saman Maleki; Pal, Sumanta K.; Sfanos, Karen S.                                                                                                                                                                                                  | EUROPEAN UROLOGY                  | 2019 | 75  | 4  | 16 | 8   |
| Advancing Personalized Medicine Through the Application of Whole Exome Sequencing and Big Data Analytics                      | Suwinski, Pawel; Ong, ChuangKee; Ling, Maurice H. T.; Poh, Yang Ming; Khan, Asif M.; Ong, Hui San                                                                                                                                                                                                                                                         | FRONTIERS IN GENETICS             | 2019 | 10  |    | 16 | 8   |
| N-Myc mediated epigenetic reprogramming drives lineage plasticity in advanced prostate cancer                                 | Berger, Adeline; Brady, Nicholas J.; Bareja, Rohan; Robinson, Brian; Conteduca, Vincenza; Augello, Michael A.; Ruca, Loredana; Ahmed, Adnan; Dardenne, Etienne; Lu, Xiaodong; Hwang, Inah; Bagadion, Alyssa M.; Sboner, Andrea; Elemento, Olivier; Paik, Jihye; Yu, Jindan; Barbieri, Christopher E.; Dephoure, Noah; Beltran, Himisha; Rickman, David S. | JOURNAL OF CLINICAL INVESTIGATION | 2019 | 129 | 9  | 15 | 7,5 |

|                                                                                                                                           |                                                                                                                                                                                                                                                                                      |                                             |      |     |      |    |     |
|-------------------------------------------------------------------------------------------------------------------------------------------|--------------------------------------------------------------------------------------------------------------------------------------------------------------------------------------------------------------------------------------------------------------------------------------|---------------------------------------------|------|-----|------|----|-----|
| Long noncoding RNA PCAT6 inhibits colon cancer cell apoptosis by regulating anti-apoptotic protein ARC expression via EZH2                | Huang, Weimei; Su, Geng; Huang, Xiaoxian; Zou, Angru; Wu, Jingfang; Yang, Yunchu; Zhu, Yaru; Liang, Shumei; Li, Deyu; Ma, Feng; Guo, Linlang                                                                                                                                         | CELL CYCLE                                  | 2019 | 18  | 1    | 15 | 7,5 |
| Current Trends in Cancer Biottarker Discovery Using Urinary Metabolomics: Achievements and New Challenges                                 | Burton, Casey; Ma, Yinfa                                                                                                                                                                                                                                                             | CURRENT MEDICINAL CHEMISTRY                 | 2019 | 26  | 1    | 15 | 7,5 |
| Exosomes for Non-Invasive Cancer Monitoring                                                                                               | Kalishwaralal, Kalimuthu; Kwon, Woo Young; Park, Ki Soo                                                                                                                                                                                                                              | BIOTECHNOLOGY JOURNAL                       | 2019 | 14  | 1    | 15 | 7,5 |
| The role of microRNAs in prostate cancer migration, invasion, and metastasis                                                              | Aghdam, Shirin Golabi; Ebrazeh, Mehrdad; Hemmatzadeh, Maryam; Seyfizadeh, Narges; Shabgah, Arezoo Gowhari; Azizi, Gholamreza; Ebrahimi, Negin; Babaie, Farhad; Mohammadi, Hamed                                                                                                      | JOURNAL OF CELLULAR PHYSIOLOGY              | 2019 | 234 | 7    | 14 | 7   |
| A Rich Array of Prostate Cancer Molecular Biomarkers: Opportunities and Challenges                                                        | Kohaar, Indu; Petrovics, Gyorgy; Srivastava, Shiv                                                                                                                                                                                                                                    | INTERNATIONAL JOURNAL OF MOLECULAR SCIENCES | 2019 | 20  | 8    | 14 | 7   |
| Growth Hormone's Links to Cancer                                                                                                          | Boguszewski, Cesar Luiz; da Silva Boguszewski, Margaret Cristina                                                                                                                                                                                                                     | ENDOCRINE REVIEWS                           | 2019 | 40  | 2    | 14 | 7   |
| The evolution of long noncoding RNA acceptance in prostate cancer initiation, progression, and its clinical utility in disease management | Ramnarine, Varune Rohan; Kobelev, Maxim; Gibb, Ewan A.; Nouri, Mannan; Lin, Dong; Wang, Yuzhuo; Buttyan, Ralph; Davicioni, Elai; Zoubeidi, Amina; Collins, Colin C.                                                                                                                  | EUROPEAN UROLOGY                            | 2019 | 76  | 5    | 13 | 6,5 |
| Distinct structural classes of activating FOXA1 alterations in advanced prostate cancer                                                   | Parolia, Abhijit; Cieslik, Marcin; Chu, Shih-Chun; Xiao, Lanbo; Ouchi, Takahiro; Zhang, Yuping; Wang, Xiaojun; Vats, Pankaj; Cao, Xuhong; Pitchiaya, Sethuramasundaram; Su, Fengyun; Wang, Rui; Feng, Felix Y.; Wu, Yi-Mi; Lonigro, Robert J.; Robinson, Dan R.; Chinnaiyan, Arul M. | NATURE                                      | 2019 | 571 | 7765 | 13 | 6,5 |

|                                                                                                                                          |                                                                                                                                                                                                                                                                                                                                                                                                                                       |                                                    |      |    |   |    |     |
|------------------------------------------------------------------------------------------------------------------------------------------|---------------------------------------------------------------------------------------------------------------------------------------------------------------------------------------------------------------------------------------------------------------------------------------------------------------------------------------------------------------------------------------------------------------------------------------|----------------------------------------------------|------|----|---|----|-----|
| Review and perspectives on the applications of mass spectrometry imaging under ambient conditions                                        | Perez, Consuelo J.; Bagga, Aafreen K.; Prova, Shamina S.; Taemeh, Maryam Yousefi; Ifa, Demian R.                                                                                                                                                                                                                                                                                                                                      | RAPID COMMUNICATIONS IN MASS SPECTROMETRY          | 2019 | 33 |   | 13 | 6,5 |
| Next-Generation Hedgehog/GLI Pathway Inhibitors for Cancer Therapy                                                                       | Peer, Elisabeth; Tesanovic, Suzana; Aberger, Fritz                                                                                                                                                                                                                                                                                                                                                                                    | CANCERS                                            | 2019 | 11 | 4 | 13 | 6,5 |
| Biological Evolution of Castration-resistant Prostate Cancer                                                                             | Davies, Alastair; Conteduca, Vincenza; Zoubeydi, Amina; Beltran, Himisha                                                                                                                                                                                                                                                                                                                                                              | EUROPEAN UROLOGY FOCUS                             | 2019 | 5  | 2 | 13 | 6,5 |
| Pirin: a potential novel therapeutic target for castration-resistant prostate cancer regulated by miR-455-5p                             | Arai, Takayuki; Kojima, Satoko; Yamada, Yasutaka; Sugawara, Sho; Kato, Mayuko; Yamazaki, Kazuto; Naya, Yukio; Ichikawa, Tomohiko; Seki, Naohiko                                                                                                                                                                                                                                                                                       | MOLECULAR ONCOLOGY                                 | 2019 | 13 | 2 | 13 | 6,5 |
| Large oncosomes overexpressing integrin alpha-V promote prostate cancer adhesion and invasion via AKT activation                         | Ciardello, Chiara; Leone, Alessandra; Lanuti, Paola; Roca, Maria S.; Moccia, Tania; Minciocchi, Valentina R.; Minopoli, Michele; Gigantino, Vincenzo; De Cecio, Rossella; Rippa, Massimo; Petti, Lucia; Capone, Francesca; Vitagliano, Carlo; Milone, Maria R.; Pucci, Biagio; Lombardi, Rita; Iannelli, Federica; Di Gennaro, Elena; Bruzzese, Francesca; Marchisio, Marco; Carriero, Maria, V; Di Vizio, Dolores; Budillon, Alfredo | JOURNAL OF EXPERIMENTAL & CLINICAL CANCER RESEARCH | 2019 | 38 |   | 12 | 6   |
| Long noncoding RNA PCAT1, a novel serum-based biomarker, enhances cell growth by sponging miR-326 in oesophageal squamous cell carcinoma | Huang, Lijie; Wang, Yan; Chen, Jiao; Wang, Yu; Zhao, Yabing; Wang, Yali; Ma, Yunping; Chen, Xin; Liu, Wenzhong; Li, Zhengzheng; Zhao, Lianmei; Shan, Baoen; Dong, Xin; Li, Dan; Shao, Shujuan; Song, Yongmei; Zhan, Qimin; Liu, Xuefeng                                                                                                                                                                                               | CELL DEATH & DISEASE                               | 2019 | 10 |   | 12 | 6   |

|                                                                                                                                                                         |                                                                                                                                                                                                                                                                                                                            |                                             |      |    |    |    |     |
|-------------------------------------------------------------------------------------------------------------------------------------------------------------------------|----------------------------------------------------------------------------------------------------------------------------------------------------------------------------------------------------------------------------------------------------------------------------------------------------------------------------|---------------------------------------------|------|----|----|----|-----|
| DNA-Methylation-Based Detection of Urological Cancer in Urine: Overview of Biomarkers and Considerations on Biomarker Design, Source of DNA, and Detection Technologies | Larsen, Louise Katrine; Lind, Guro Elisabeth; Guldberg, Per; Dahl, Christina                                                                                                                                                                                                                                               | INTERNATIONAL JOURNAL OF MOLECULAR SCIENCES | 2019 | 20 | 11 | 12 | 6   |
| Overexpression of the ASPM gene is associated with aggressiveness and poor outcome in bladder cancer                                                                    | Xu, Zhenglin; Zhang, Qi; Luh, Frank; Jin, Baiye; Liu, Xiyong                                                                                                                                                                                                                                                               | ONCOLOGY LETTERS                            | 2019 | 17 | 2  | 12 | 6   |
| Neuroendocrine Differentiation in Prostate Cancer: Emerging Biology, Models, and Therapies                                                                              | Puca, Loredana; Vlachostergios, Panagiotis J.; Beltran, Himisha                                                                                                                                                                                                                                                            | COLD SPRING HARBOR PERSPECTIVES IN MEDICINE | 2019 | 9  | 2  | 12 | 6   |
| Post-GWAS in prostate cancer: from genetic association to biological contribution                                                                                       | Farashi, Samaneh; Kryza, Thomas; Clements, Judith; Batra, Jyotsna                                                                                                                                                                                                                                                          | NATURE REVIEWS CANCER                       | 2019 | 19 | 1  | 12 | 6   |
| Metabolic Regulation of Redox Balance in Cancer                                                                                                                         | Purohit, Vinee; Simeone, Diane M.; Lyssiotis, Costas A.                                                                                                                                                                                                                                                                    | CANCERS                                     | 2019 | 11 | 7  | 11 | 5,5 |
| The influence of BRCA2 mutation on localized prostate cancer                                                                                                            | Taylor, Renea A.; Fraser, Michael; Rebello, Richard J.; Boutros, Paul C.; Murphy, Declan G.; Bristow, Robert G.; Risbridger, Gail P.                                                                                                                                                                                       | NATURE REVIEWS UROLOGY                      | 2019 | 16 | 5  | 11 | 5,5 |
| An AR-ERG transcriptional signature defined by long-range chromatin interactomes in prostate cancer cells                                                               | Zhang, Zhizhuo; Chng, Kern Rei; Lingadahalli, Shreyas; Chen, Zikai; Liu, Mei Hui; Do, Huy Hoang; Cai, Shaojiang; Rinaldi, Nicola; Poh, Huay Mei; Li, Guoliang; Sung, Ying Ying; Heng, Charlie L.; Core, Leighton J.; Tan, Si Kee; Ruan, Xiaolan; Lis, John T.; Kellis, Manolis; Ruan, Yijun; Sung, Wing-Kin; Cheung, Edwin | GENOME RESEARCH                             | 2019 | 29 | 2  | 11 | 5,5 |

|                                                                                                                                                         |                                                                                                                                                                                                                                                                                           |                                                             |      |     |   |    |     |
|---------------------------------------------------------------------------------------------------------------------------------------------------------|-------------------------------------------------------------------------------------------------------------------------------------------------------------------------------------------------------------------------------------------------------------------------------------------|-------------------------------------------------------------|------|-----|---|----|-----|
| Genomic Classifier for Guiding Treatment of Intermediate-Risk Prostate Cancers to Dose-Escalated Image Guided Radiation Therapy Without Hormone Therapy | Berlin, Alejandro; Murgic, Jure; Hosni, Ali; Pintilie, Melania; Salcedo, Adriana; Fraser, Michael; Kamel-Reid, Suzanne; Zhang, Jingbin; Wang, Qiqi; Ch'ng, Carolyn; Deheshi, Samineh; Davicioni, Elai; van der Kwast, Theodorus; Boutros, Paul C.; Bristow, Robert G.; Chua, Melvin L. K. | INTERNATIONAL JOURNAL OF RADIATION ONCOLOGY BIOLOGY PHYSICS | 2019 | 103 | 1 | 11 | 5,5 |
| SRRM4 gene expression correlates with neuroendocrine prostate cancer                                                                                    | Li, Yinan; Zhang, Qingfu; Lovnicki, Jessica; Chen, Ruiqi; Fazli, Ladan; Wang, Yuzhuo; Gleave, Martin; Huang, Jiaoti; Dong, Xuesen                                                                                                                                                         | PROSTATE                                                    | 2019 | 79  | 1 | 11 | 5,5 |

|                                                                                                                        |                                                                                                                                                                                                                                                                                                                                                                                                                                                                                                                                                                                                                                                                                                                                                                                                                                                                                                                                                                                                                                                                                                                                                                                                                                                                                            |                            |      |    |   |    |    |
|------------------------------------------------------------------------------------------------------------------------|--------------------------------------------------------------------------------------------------------------------------------------------------------------------------------------------------------------------------------------------------------------------------------------------------------------------------------------------------------------------------------------------------------------------------------------------------------------------------------------------------------------------------------------------------------------------------------------------------------------------------------------------------------------------------------------------------------------------------------------------------------------------------------------------------------------------------------------------------------------------------------------------------------------------------------------------------------------------------------------------------------------------------------------------------------------------------------------------------------------------------------------------------------------------------------------------------------------------------------------------------------------------------------------------|----------------------------|------|----|---|----|----|
| Management of Patients with Advanced Prostate Cancer: Report of the Advanced Prostate Cancer Consensus Conference 2019 | Gillessena, Silke; Attard, Gerhardt; Beer, Tomasz M.; Beltran, Himisha; Bjartell, Anders; Bossi, Alberto; Briganti, Alberto; Bristow, Rob G.; Chi, Kim N.; Clarke, Noel; Davis, Ian D.; de Bono, Johann; Drake, Charles G.; Duran, Ignacio; Eeles, Ros; Efstathiou, Eleni; Evans, Christopher P.; Fanti, Stefano; Feng, Felix Y.; Fizazi, Karim; Frydenberg, Mark; Gleave, Martin; Halabi, Susan; Heidenreich, Axel; Heinrich, Daniel; Higano, Celestia (Tia) S.; Hofman, Michael S.; Hussain, Maha; James, Nicolas; Kanesvaran, Ravindran; Kantoff, Philip; Khauli, Raja B.; Leibowitz, Raya; Logothetis, Chris; Maluf, Fernando; Millman, Robin; Morgans, Alicia K.; Morris, Michael J.; Mottet, Nicolas; Mrabti, Hind; Murphy, Declan G.; Murthy, Vedang; Oh, William K.; Ost, Piet; OSullivan, Joe M.; Padhani, Anwar R.; Parker, Chris; Poon, Darren M. C.; Pritchard, Colin C.; Reiter, Robert E.; Roach, Mack; Rubin, Mark; Ryan, Charles J.; Saad, Fred; Sade, Juan Pablo; Sartor, Oliver; Scher, Howard, I; Shore, Neal; Small, Eric; Smith, Matthew; Soule, Howard; Sternberg, Cora N.; Steuber, Thomas; Suzuki, Hiroyoshi; Sweeney, Christopher; Sydes, Matthew R.; Taplin, Mary-Ellen; Tombal, Bertrand; Turkeri, Levent; van Oort, Inge; Zapatero, Almudena; Omlind, Aurelius | EUROPEAN UROLOGY           | 2020 | 77 | 4 | 10 | 10 |
| The potential and controversy of targeting STAT family members in cancer                                               | Verhoeven, Yannick; Tilborghs, Sam; Jacobs, Julie; De Waele, Jorrit; Quatannens, Delphine; Deben, Christophe; Prenen, Hans; Pauwels, Patrick; Xuan Bich Trinh; Wouters, An; Smits, Evelien L. J.; Lardon, Filip; van Dam, Peter A.                                                                                                                                                                                                                                                                                                                                                                                                                                                                                                                                                                                                                                                                                                                                                                                                                                                                                                                                                                                                                                                         | SEMINARS IN CANCER BIOLOGY | 2020 | 60 |   | 10 | 10 |

|                                                                                                                                                                                       |                                                                                                                                                                                                                                                                                                                                                                                                                                                                                            |                            |      |     |    |    |   |
|---------------------------------------------------------------------------------------------------------------------------------------------------------------------------------------|--------------------------------------------------------------------------------------------------------------------------------------------------------------------------------------------------------------------------------------------------------------------------------------------------------------------------------------------------------------------------------------------------------------------------------------------------------------------------------------------|----------------------------|------|-----|----|----|---|
| Clinical features of neuroendocrine prostate cancer                                                                                                                                   | Conteduca, Vincenza; Oromendia, Clara; Eng, Kenneth W.; Bareja, Rohan; Sigouros, Michael; Molina, Ana; Faltas, Bishoy M.; Sboner, Andrea; Mosquera, Juan Miguel; Elemento, Olivier; Nanus, David M.; Tagawa, Scott T.; Ballman, Karla V.; Beltran, Himisha                                                                                                                                                                                                                                 | EUROPEAN JOURNAL OF CANCER | 2019 | 121 |    | 10 | 5 |
| A positive role of c-Myc in regulating androgen receptor and its splice variants in prostate cancer                                                                                   | Bai, Shanshan; Cao, Subing; Jin, Lianjin; Kobelski, Margaret; Schouest, Blake; Wang, Xiaojie; Ungerleider, Nathan; Baddoo, Melody; Zhang, Wensheng; Corey, Eva; Vessella, Robert L.; Dong, Xuesen; Zhang, Kun; Yu, Xianghui; Flemington, Erik K.; Dong, Yan                                                                                                                                                                                                                                | ONCOGENE                   | 2019 | 38  | 25 | 10 | 5 |
| The Metabolic Landscape of Prostate Cancer                                                                                                                                            | Giunchi, Francesca; Fiorentino, Michelangelo; Loda, Massimo                                                                                                                                                                                                                                                                                                                                                                                                                                | EUROPEAN UROLOGY ONCOLOGY  | 2019 | 2   | 1  | 10 | 5 |
| Non-BRCA DNA Damage Repair Gene Alterations and Response to the PARP Inhibitor Rucaparib in Metastatic Castration-Resistant Prostate Cancer: Analysis From the Phase II TRITON2 Study | Abida, Wassim; Campbell, David; Patnaik, Akash; Shapiro, Jeremy D.; Sautois, Brieuc; Vogelzang, Nicholas J.; Voog, Eric G.; Bryce, Alan H.; McDermott, Ray; Ricci, Francesco; Rowe, Julie; Zhang, Jingsong; Piulats, Josep Maria; Fizazi, Karim; Merseburger, Axel S.; Higano, Celestia S.; Krieger, Laurence E.; Ryan, Charles J.; Feng, Felix Y.; Simmons, Andrew D.; Loehr, Andrea; Despain, Darrin; Dowson, Melanie; Green, Foad; Watkins, Simon P.; Golsorkhi, Tony; Chowdhury, Simon | CLINICAL CANCER RESEARCH   | 2020 | 26  | 11 | 8  | 8 |
| Hyperpolarized MRI of Human Prostate Cancer Reveals Increased Lactate with Tumor Grade Driven by Monocarboxylate Transporter 1                                                        | Granlund, Kristin L.; Tee, Sui-Seng; Vargas, Hebert A.; Lyashchenko, Serge K.; Reznik, Ed; Fine, Samson; Laudone, Vincent; Eastham, James A.; Touijer, Karim A.; Reuter, Victor E.; Gonen, Mithat; Sosa, Ramon E.; Nicholson, Duane; Guo, YanWei W.; Chen, Albert P.; Tropp, James; Robb, Fraser; Hricak, Hedvig; Keshari, Kayvan R.                                                                                                                                                       | CELL METABOLISM            | 2020 | 31  | 1  | 7  | 7 |

|                                                                                                                                                                       |                                                                                                                                                                                                                                                                                                                                                                            |                                |      |     |   |   |   |
|-----------------------------------------------------------------------------------------------------------------------------------------------------------------------|----------------------------------------------------------------------------------------------------------------------------------------------------------------------------------------------------------------------------------------------------------------------------------------------------------------------------------------------------------------------------|--------------------------------|------|-----|---|---|---|
| Wnt-pathway Activating Mutations Are Associated with Resistance to First-line Abiraterone and Enzalutamide in Castration-resistant Prostate Cancer                    | Velho, Pedro Isaacsson; Fu, Wei; Wang, Hao; Mirkheshti, Nooshin; Qazi, Fahad; Lima, Fabiola A. S.; Shaukat, Farah; Carducci, Michael A.; Denmeade, Samuel R.; Paller, Channing J.; Markowski, Mark C.; Marshall, Catherine H.; Eisenberger, Mario A.; Antonarakis, Emmanuel S.                                                                                             | EUROPEAN UROLOGY               | 2020 | 77  | 1 | 7 | 7 |
| Establishment and characterization of stable red, far-red (fR) and near infra-red (NIR) transfected canine prostate cancer cell lines                                 | Liu, Wen; Sender, Sina; Kong, Weibo; Beck, Julia; Sekora, Anett; Bornemann-Kolatzki, Kirsten; Schuetz, Ekkehart; Junghanss, Christian; Brenig, Bertram; Nolte, Ingo; Escobar, Hugo Murua                                                                                                                                                                                   | CANCER CELL INTERNATIONAL      | 2020 | 20  | 1 | 6 | 6 |
| Long noncoding RNA SNHG12 indicates the prognosis of prostate cancer and accelerates tumorigenesis via sponging miR-133b                                              | Cheng, Gong; Song, Zhengshuai; Liu, Yuenan; Xiao, Haibing; Ruan, Hailong; Cao, Qi; Wang, Keshan; Xiao, Wen; Xiong, Zhiyong; Liu, Di; Chen, Ke; Zhang, Xiaoping                                                                                                                                                                                                             | JOURNAL OF CELLULAR PHYSIOLOGY | 2020 | 235 | 2 | 6 | 6 |
| The Novel ATR Inhibitor BAY 1895344 Is Efficacious as Monotherapy and Combined with DNA Damage-Inducing or Repair-Compromising Therapies in Preclinical Cancer Models | Wengner, Antje M.; Siemeister, Gerhard; Luecking, Ulrich; Lefranc, Julien; Wortmann, Lars; Lienau, Philip; Bader, Benjamin; Boemer, Ulf; Moosmayer, Dieter; Eberspaecher, Uwe; Golfier, Sven; Schatz, Christoph A.; Baumgart, Simon J.; Haendler, Bernard; Lejeune, Pascale; Schlicker, Andreas; von Nussbaum, Franz; Brands, Michael; Ziegelbauer, Karl; Mumberg, Dominik | MOLECULAR CANCER THERAPEUTICS  | 2020 | 19  | 1 | 6 | 6 |
| A critical appraisal of biomarkers in prostate cancer                                                                                                                 | Narayan, Vikram M.                                                                                                                                                                                                                                                                                                                                                         | WORLD JOURNAL OF UROLOGY       | 2020 | 38  | 3 | 5 | 5 |
| Clinical Outcomes in Cyclin-dependent Kinase 12 Mutant Advanced Prostate Cancer                                                                                       | Reimers, Melissa A.; Yip, Steven M.; Zhang, Li; Cieslik, Marcin; Dhawan, Mallika; Montgomery, Bruce; Wyatt, Alexander W.; Chi, Kim N.; Small, Eric J.; Chinnaiyan, Arul M.; Alva, Ajjai S.; Feng, Felix Y.; Chou, Jonathan                                                                                                                                                 | EUROPEAN UROLOGY               | 2020 | 77  | 3 | 5 | 5 |



|                                                                                                                                                                                                                                          |                                                                                                                                                                                                                                                                                                                                                                                                                                |                                            |      |     |   |   |     |
|------------------------------------------------------------------------------------------------------------------------------------------------------------------------------------------------------------------------------------------|--------------------------------------------------------------------------------------------------------------------------------------------------------------------------------------------------------------------------------------------------------------------------------------------------------------------------------------------------------------------------------------------------------------------------------|--------------------------------------------|------|-----|---|---|-----|
| Durable Response of Enzalutamide-resistant Prostate Cancer to Supraphysiological Testosterone Is Associated with a Multifaceted Growth Suppression and Impaired DNA Damage Response Transcriptomic Program in Patient-derived Xenografts | Lam, Hung-Ming; Nguyen, Holly M.; Labrecque, Mark P.; Brown, Lisha G.; Coleman, Ilsa M.; Gulati, Roman; Lakely, Bryce; Sondheim, Daniel; Chatterjee, Payel; Marck, Brett T.; Matsumoto, Alvin M.; Mostaghel, Elahe A.; Schweizer, Michael T.; Nelson, Peter S.; Corey, Eva                                                                                                                                                     | EUROPEAN UROLOGY                           | 2020 | 77  | 2 | 5 | 5   |
| Potential screening assays for individual radiation sensitivity and susceptibility and their current validation state                                                                                                                    | Gomolka, Maria; Blyth, Benjamin; Bourguignon, Michel; Badie, Christophe; Schmitz, Annette; Talbot, Christopher; Hoeschen, Christoph; Salomaa, Sisko                                                                                                                                                                                                                                                                            | INTERNATIONAL JOURNAL OF RADIATION BIOLOGY | 2020 | 96  | 3 | 5 | 2,5 |
| Exosomes secreted by prostate cancer cells under hypoxia promote matrix metalloproteinases activity at pre-metastatic niches                                                                                                             | Deep, Gagan; Jain, Anil; Kumar, Ashish; Agarwal, Chapla; Kim, Susy; Leevy, W. Matthew; Agarwal, Rajesh                                                                                                                                                                                                                                                                                                                         | MOLECULAR CARCINOGENESIS                   | 2020 | 59  | 3 | 4 | 4   |
| A low DNA methylation epigenotype in lung squamous cell carcinoma and its association with idiopathic pulmonary fibrosis and poorer prognosis                                                                                            | Hata, Atsushi; Nakajima, Takahiro; Matsusaka, Keisuke; Fukuyo, Masaki; Morimoto, Junichi; Yamamoto, Takayoshi; Sakairi, Yuichi; Rahmutulla, Bahityar; Ota, Satoshi; Wada, Hironobu; Suzuki, Hidemi; Matsubara, Hisahiro; Yoshino, Ichiro; Kaneda, Atsushi                                                                                                                                                                      | INTERNATIONAL JOURNAL OF CANCER            | 2020 | 146 | 2 | 4 | 2   |
| Prospective study to define the clinical utility and benefit of Decipher testing in men following prostatectomy                                                                                                                          | Marascio, Joseph; Spratt, Daniel E.; Zhang, Jingbin; Trabulsi, Edouard J.; Le, Tiffany; Sedzorme, Worlanyo Sosu; Beeler, Whitney H.; Davicioni, Elai; Dabbas, Bashar; Lin, Daniel W.; Gore, John L.; Bloom, Matthew; Mann, Mark; Mark, J. Ryan; Calvaresi, Anne; Godwin, James L.; McCue, Peter; Hurwitz, Mark D.; Kelly, W. Kevin; Lallas, Costas D.; Knudsen, Karen E.; Gomella, Leonard G.; Dicker, Adam P.; Den, Robert B. | PROSTATE CANCER AND PROSTATIC DISEASES     | 2020 | 23  | 2 | 3 | 3   |

|                                                                                                                                |                                                                                                                                                                                                                                                                                                                                                                                                                                                                                                                    |                                         |      |     |    |   |     |
|--------------------------------------------------------------------------------------------------------------------------------|--------------------------------------------------------------------------------------------------------------------------------------------------------------------------------------------------------------------------------------------------------------------------------------------------------------------------------------------------------------------------------------------------------------------------------------------------------------------------------------------------------------------|-----------------------------------------|------|-----|----|---|-----|
| Patients Resistant Against PSMA-Targeting alpha-Radiation Therapy Often Harbor Mutations in DNA Damage-Repair-Associated Genes | Kratochwil, Clemens; Giesel, Frederik L.; Heussel, Claus-Peter; Kazdal, Daniel; Endris, Volker; Nientiedt, Cathleen; Bruchertseifer, Frank; Kippenberger, Maximilian; Rathke, Hendrik; Leichsenring, Jonas; Hohenfellner, Markus; Morgenstern, Alfred; Haberkorn, Uwe; Duensing, Stefan; Stenzinger, Albrecht                                                                                                                                                                                                      | JOURNAL OF NUCLEAR MEDICINE             | 2020 | 61  | 5  | 3 | 3   |
| Exosomal microRNAs as liquid biopsy biomarkers in prostate cancer                                                              | Wang, Jingpu; Ni, Jie; Beretov, Julia; Thompson, James; Graham, Peter; Li, Yong                                                                                                                                                                                                                                                                                                                                                                                                                                    | CRITICAL REVIEWS IN ONCOLOGY HEMATOLOGY | 2020 | 145 |    | 3 | 3   |
| LncRNA SNHG15: A new budding star in human cancers                                                                             | Shuai, You; Ma, Zhonghua; Lu, Jianwei; Feng, Jifeng                                                                                                                                                                                                                                                                                                                                                                                                                                                                | CELL PROLIFERATION                      | 2020 | 53  | 1  | 3 | 1,5 |
| Long noncoding RNA FER1L4 acts as an oncogenic driver in human pan-cancer                                                      | You, Zilong; Ge, Anqi; Pang, Da; Zhao, Yashuang; Xu, Shouping                                                                                                                                                                                                                                                                                                                                                                                                                                                      | JOURNAL OF CELLULAR PHYSIOLOGY          | 2020 | 235 | 2  | 3 | 1,5 |
| Prostate cancer cell-intrinsic interferon signaling regulates dormancy and metastatic outgrowth in bone                        | Owen, Katie L.; Gearing, Linden J.; Zanker, Damien J.; Brockwell, Natasha K.; Khoo, Weng Hua; Roden, Daniel L.; Cmero, Marek; Mangiola, Stefano; Hong, Matthew K.; Spurling, Alex J.; McDonald, Michelle; Chan, Chia-Ling; Pasam, Anupama; Lyons, Ruth J.; Duivenvoorden, Hendrika M.; Ryan, Andrew; Butler, Lisa M.; Mariadason, John M.; Phan, Tri Giang; Hayes, Vanessa M.; Sandhu, Shahneen; Swarbrick, Alexander; Corcoran, Niall M.; Hertzog, Paul J.; Croucher, Peter, I; Hovens, Chris; Parker, Belinda S. | EMBO REPORTS                            | 2020 | 21  | 6  | 2 | 2   |
| Molecular Biomarkers in Localized Prostate Cancer: ASCO Guideline                                                              | Eggerer, Scott E.; Rumble, R. Bryan; Armstrong, Andrew J.; Morgan, Todd M.; Crispino, Tony; Cornford, Philip; van der Kwast, Theodorus; Grignon, David J.; Rai, Alex J.; Agarwal, Neeraj; Klein, Eric A.; Den, Robert B.; Beltran, Himisha                                                                                                                                                                                                                                                                         | JOURNAL OF CLINICAL ONCOLOGY            | 2020 | 38  | 13 | 2 | 2   |

|                                                                                                                                                                                                                                       |                                                                                                                                                                                                                                                                                                                                                                                                                                                                                                              |                                       |      |    |   |   |   |
|---------------------------------------------------------------------------------------------------------------------------------------------------------------------------------------------------------------------------------------|--------------------------------------------------------------------------------------------------------------------------------------------------------------------------------------------------------------------------------------------------------------------------------------------------------------------------------------------------------------------------------------------------------------------------------------------------------------------------------------------------------------|---------------------------------------|------|----|---|---|---|
| Intron retention is a hallmark and spliceosome represents a therapeutic vulnerability in aggressive prostate cancer                                                                                                                   | Zhang, Dingxiao; Hu, Qiang; Liu, Xiaozhuo; Ji, Yibing; Chao, Hsueh-Ping; Liu, Yan; Tracz, Amanda; Kirk, Jason; Buonamici, Silvia; Zhu, Ping; Wang, Jianmin; Liu, Song; Tang, Dean G.                                                                                                                                                                                                                                                                                                                         | NATURE COMMUNICATIONS                 | 2020 | 11 | 1 | 2 | 2 |
| Prostate cancer cell-intrinsic interferon signaling regulates dormancy and metastatic outgrowth in bone                                                                                                                               | Owen, Katie L.; Gearing, Linden J.; Zanker, Damien J.; Brockwell, Natasha K.; Khoo, Weng Hua; Roden, Daniel L.; Cmero, Marek; Mangiola, Stefano; Hong, Matthew K.; Spurling, Alex J.; McDonald, Michelle; Chan, Chia-Ling; Pasam, Anupama; Lyons, Ruth J.; Duivenvoorden, Hendrika M.; Ryan, Andrew; Butler, Lisa M.; Mariadason, John M.; Phan, Tri; Hayes, Vanessa M.; Sandhu, Shahneen; Swarbrick, Alexander; Corcoran, Niall M.; Hertzog, Paul J.; Croucher, Peter, I; Hovens, Chris; Parker, Belinda S. | EMBO REPORTS                          | 2020 |    |   | 2 | 2 |
| Appraising causal relationships of dietary, nutritional and physical-activity exposures with overall and aggressive prostate cancer: two-sample Mendelian-randomization study based on 79148 prostate-cancer cases and 61106 controls | Kazmi, Nabila; Haycock, Philip; Tsilidis, Konstantinos; Lynch, Brigid M.; Truong, Therese; Martin, Richard M.; Lewis, Sarah J.                                                                                                                                                                                                                                                                                                                                                                               | INTERNATIONAL JOURNAL OF EPIDEMIOLOGY | 2020 | 49 | 2 | 2 | 2 |
| Single-sample landscape entropy reveals the imminent phase transition during disease progression                                                                                                                                      | Liu, Rui; Chen, Pei; Chen, Luonan                                                                                                                                                                                                                                                                                                                                                                                                                                                                            | BIOINFORMATICS                        | 2020 | 36 | 5 | 2 | 2 |
| Cell Stress Induced Stressome Release Including Damaged Membrane Vesicles and Extracellular HSP90 by Prostate Cancer Cells                                                                                                            | Eguchi, Takanori; Sogawa, Chiharu; Ono, Kisho; Matsumoto, Masaki; Manh Tien Tran; Okusha, Yuka; Lang, Benjamin J.; Okamoto, Kuniaki; Calderwood, Stuart K.                                                                                                                                                                                                                                                                                                                                                   | CELLS                                 | 2020 | 9  | 3 | 2 | 2 |
| Integrative molecular characterization of Chinese prostate cancer specimens                                                                                                                                                           | Lv, Shi-Dong; Wang, Hong-Yi; Yu, Xin-Pei; Zhai, Qi-Liang; Wu, Yao-Bin; Wei, Qiang; Huang, Wen-Hua                                                                                                                                                                                                                                                                                                                                                                                                            | ASIAN JOURNAL OF ANDROLOGY            | 2020 | 22 | 2 | 2 | 2 |

|                                                                                                                                                                       |                                                                                                                                                                                                                                                                                                                         |                         |      |    |    |   |   |
|-----------------------------------------------------------------------------------------------------------------------------------------------------------------------|-------------------------------------------------------------------------------------------------------------------------------------------------------------------------------------------------------------------------------------------------------------------------------------------------------------------------|-------------------------|------|----|----|---|---|
| Understanding aberrant RNA splicing to facilitate cancer diagnosis and therapy                                                                                        | Dong, Xuesen; Chen, Ruiqi                                                                                                                                                                                                                                                                                               | ONCOGENE                | 2020 | 39 | 11 | 2 | 2 |
| Allergy, asthma, and the risk of breast and prostate cancer: a Mendelian randomization study                                                                          | Jiang, Xia; Dimou, Niki L.; Zhu, Zhaozhong; Bonilla, Carolina; Lewis, Sarah J.; Lindstrom, Sara; Kraft, Peter; Tsilidis, Konstantinos K.; Martin, Richard M.                                                                                                                                                            | CANCER CAUSES & CONTROL | 2020 | 31 | 3  | 2 | 2 |
| Data Mining and Expression Analysis of Differential lncRNA ADAMTS9-AS1 in Prostate Cancer                                                                             | Wan, Jiahui; Jiang, Shijun; Jiang, Ying; Ma, Wei; Wang, Xiuli; He, Zikang; Wang, Xiaojin; Cui, Rongjun                                                                                                                                                                                                                  | FRONTIERS IN GENETICS   | 2020 | 10 |    | 2 | 2 |
| Divergent mutational processes distinguish hypoxic and normoxic tumours                                                                                               | Bhandari, Vinayak; Li, Constance H.; Bristow, Robert G.; Boutros, Paul C.                                                                                                                                                                                                                                               | NATURE COMMUNICATIONS   | 2020 | 11 | 1  | 2 | 2 |
| HNF1B-mediated repression of SLUG is suppressed by EZH2 in aggressive prostate cancer                                                                                 | Wang, Jianqing; He, Chenxi; Gao, Peng; Wang, Siqing; Lv, Ruitu; Zhou, Huihui; Zhou, Qidong; Zhang, Ke; Sun, Jian; Fan, Caibin; Ding, Guanxiong; Lan, Fei                                                                                                                                                                | ONCOGENE                | 2020 | 39 | 6  | 2 | 2 |
| Phenethyl Isothiocyanate Suppresses Stemness in the Chemo- and Radio-Resistant Triple-Negative Breast Cancer Cell Line MDA-MB-231/IR Via Downregulation of Metadherin | Nguyen, Yen Thi-Kim; Moon, Jeong Yong; Ediriweera, Meran Keshawa; Cho, Somi Kim                                                                                                                                                                                                                                         | CANCERS                 | 2020 | 12 | 2  | 2 | 2 |
| Identification of a Circulating Amino Acid Signature in Frail Older Persons with Type 2 Diabetes Mellitus: Results from the Metabofrail Study                         | Calvani, Riccardo; Rodriguez-Manas, Leocadio; Picca, Anna; Marini, Federico; Biancolillo, Alessandra; Laosa, Olga; Pedraza, Laura; Gervasoni, Jacopo; Primiano, Aniello; Conta, Giorgia; Bourdel-Marchasson, Isabelle; Regueme, Sophie C.; Bernabei, Roberto; Marzetti, Emanuele; Sinclair, Alan J.; Gambassi, Giovanni | NUTRIENTS               | 2020 | 12 | 1  | 2 | 2 |

|                                                                                                                                                                                     |                                                                                                                                                                                                                                                                                                                                                                                                                        |                                               |      |     |    |   |   |
|-------------------------------------------------------------------------------------------------------------------------------------------------------------------------------------|------------------------------------------------------------------------------------------------------------------------------------------------------------------------------------------------------------------------------------------------------------------------------------------------------------------------------------------------------------------------------------------------------------------------|-----------------------------------------------|------|-----|----|---|---|
| Development of Treatments for Localized Prostate Cancer in Patients Eligible for Active Surveillance: US Food and Drug Administration Oncology Center of Excellence Public Workshop | Weinstock, Chana; Suzman, Daniel; Kluetz, Paul; Baxley, John; Viviano, Charles; Ibrahim, Amna; Jarow, Jonathan; Sridhara, Raejshwari; Liu, Ke; Carroll, Peter; Eggener, Scott; Hu, Jim C.; Hussain, Maha; King, Martin; Klein, Eric; Kungel, Terry; Makarov, Danil; Pinto, Peter A.; Rini, Brian; Roach, Mack; Sandler, Howard; Schlegel, Peter N.; Song, Daniel; Goldberg, Kirsten; Pazdur, Richard; Beaver, Julia A. | JOURNAL OF UROLOGY                            | 2020 | 203 | 1  | 2 | 2 |
| HDR Prostate Brachytherapy                                                                                                                                                          | Crook, Juanita; Marban, Marina; Batchelar, Deidre                                                                                                                                                                                                                                                                                                                                                                      | SEMINARS IN RADIATION ONCOLOGY                | 2020 | 30  | 1  | 2 | 2 |
| Sulforaphane Bioavailability and Chemopreventive Activity in Men Presenting for Biopsy of the Prostate Gland: A Randomized Controlled Trial                                         | Zhang, Zhenzhen; Garzotto, Mark; Davis, Edward W.; Mori, Motomi; Stoller, Wesley A.; Farris, Paige E.; Wong, Carmen P.; Beaver, Laura M.; Thomas, George, V; Williams, David E.; Dashwood, Roderick H.; Hendrix, David A.; Ho, Emily; Shannon, Jackilen                                                                                                                                                                | NUTRITION AND CANCER-AN INTERNATIONAL JOURNAL | 2020 | 72  | 1  | 2 | 1 |
| ATM Loss Confers Greater Sensitivity to ATR Inhibition Than PARP Inhibition in Prostate Cancer                                                                                      | Rafiei, Shahrzad; Fitzpatrick, Kenyon; Liu, David; Cai, Mu-Yan; Elmarakeby, Haitham A.; Park, Jihye; Ricker, Cora; Kochupurakkal, Bose S.; Choudhury, Atish D.; Hahn, William C.; Balk, Steven P.; Hwang, Justin H.; Van Allen, Eliezer M.; Mouw, Kent W.                                                                                                                                                              | CANCER RESEARCH                               | 2020 | 80  | 11 | 1 | 1 |
| The influence of hypoxia on the prostate cancer proteome                                                                                                                            | Ross, James A.; Vissers, Johannes P. C.; Nanda, Jyoti; Stewart, Grant D.; Husi, Holger; Habib, Fouad K.; Hammond, Dean E.; Gethings, Lee A.                                                                                                                                                                                                                                                                            | CLINICAL CHEMISTRY AND LABORATORY MEDICINE    | 2020 | 58  | 6  | 1 | 1 |
| Detection of novel mitochondrial mutations in cytochrome C oxidase subunit 1 (COX1) in patients with familial adenomatous polyposis (FAP)                                           | Afkhami, E.; Heidari, M. M.; Khatami, M.; Ghadamyari, F.; Dianatpour, S.                                                                                                                                                                                                                                                                                                                                               | CLINICAL & TRANSLATIONAL ONCOLOGY             | 2020 | 22  | 6  | 1 | 1 |

|                                                                                                                                                              |                                                                                                                                                                                                                                                                                                                                                                                                                                                                                                                                                                                                           |                              |      |    |    |   |   |
|--------------------------------------------------------------------------------------------------------------------------------------------------------------|-----------------------------------------------------------------------------------------------------------------------------------------------------------------------------------------------------------------------------------------------------------------------------------------------------------------------------------------------------------------------------------------------------------------------------------------------------------------------------------------------------------------------------------------------------------------------------------------------------------|------------------------------|------|----|----|---|---|
| Proteomic Tissue-Based Classifier for Early Prediction of Prostate Cancer Progression                                                                        | Gao, Yuqian; Wang, Yi-Ting; Chen, Yongmei; Wang, Hui; Young, Denise; Shi, Tujin; Song, Yingjie; Schepmoes, Athena A.; Kuo, Claire; Fillmore, Thomas L.; Qian, Wei-Jun; Smith, Richard D.; Srivastava, Sudhir; Kagan, Jacob; Dobi, Albert; Sesterhenn, Isabell A.; Rosner, Inger L.; Petrovics, Gyorgy; Rodland, Karin D.; Srivastava, Shiv; Cullen, Jennifer; Liu, Tao                                                                                                                                                                                                                                    | CANCERS                      | 2020 | 12 | 5  | 1 | 1 |
| Rapid Prostate Cancer Noninvasive Biomarker Screening Using Segmented Flow Mass Spectrometry-Based Untargeted Metabolomics                                   | Pinto, Frederico G.; Mahmud, Iqbal; Harmon, Taylor A.; Rubio, Vanessa Y.; Garrett, Timothy J.                                                                                                                                                                                                                                                                                                                                                                                                                                                                                                             | JOURNAL OF PROTEOME RESEARCH | 2020 | 19 | 5  | 1 | 1 |
| Benefits and Risks of Primary Treatments for High -risk Localized and Locally Advanced Prostate Cancer: An International Multidisciplinary Systematic Review | Moris, Lisa; Cumberbatch, Marcus G.; Van den Broeck, Thomas; Gandaglia, Giorgio; Fossati, Nicola; Kelly, Brian; Pal, Raj; Briers, Erik; Cornford, Philip; De Santis, Maria; Fanti, Stefano; Gillessen, Silke; Grummet, Jeremy P.; Henry, Ann M.; Lam, Thomas B. L.; Lardas, Michael; Liew, Matthew; Mason, Malcolm D.; Omar, Muhammad Imran; Rouviere, Olivier; Schoots, Ivo G.; Tilki, Derya; van den Bergh, Roderick C. N.; van Der Kwast, Theodorus H.; van Der Poel, Henk G.; Willemse, Peter-Paul M.; Yuan, Cathy Y.; Konety, Badrinath; Dorff, Tanya; Jain, Suneil; Mottet, Nicolas; Wiegel, Thomas | EUROPEAN UROLOGY             | 2020 | 77 | 5  | 1 | 1 |
| Metabolic Fingerprinting on Synthetic Alloys for Medulloblastoma Diagnosis and Radiotherapy Evaluation                                                       | Cao, Jing; Shi, Xuejiao; Gurav, Deepanjali D.; Huang, Lin; Su, Haiyang; Li, Keke; Niu, Jingyang; Zhang, Mengji; Wang, Qian; Jiang, Mawei; Qian, Kun                                                                                                                                                                                                                                                                                                                                                                                                                                                       | ADVANCED MATERIALS           | 2020 | 32 | 23 | 1 | 1 |

|                                                                                                                                                                       |                                                                                                                                                                                                                                                                                                                                                                 |                                   |      |      |   |   |   |
|-----------------------------------------------------------------------------------------------------------------------------------------------------------------------|-----------------------------------------------------------------------------------------------------------------------------------------------------------------------------------------------------------------------------------------------------------------------------------------------------------------------------------------------------------------|-----------------------------------|------|------|---|---|---|
| Ligand-based pharmacophore filtering, atom based 3D-QSAR, virtual screening and ADME studies for the discovery of potential ck2 inhibitors                            | Mohan, A.; Kirubakaran, R.; Parray, J. A.; Sivakumar, R.; Muruges, E.; Govarthanan, M.                                                                                                                                                                                                                                                                          | JOURNAL OF MOLECULAR STRUCTURE    | 2020 | 1205 |   | 1 | 1 |
| Fold-Change-Specific Enrichment Analysis (FSEA): Quantification of Transcriptional Response Magnitude for Functional Gene Groups                                      | Wiebe, Daniil S.; Omelyanchuk, Nadezhda A.; Mukhin, Aleksei M.; Grosse, Ivo; Lashin, Sergey A.; Zemlyanskaya, Elena, V; Mironova, Victoria V.                                                                                                                                                                                                                   | GENES                             | 2020 | 11   | 4 | 1 | 1 |
| Clinical and genomic insights into circulating tumor DNA-based alterations across the spectrum of metastatic hormone-sensitive and castrate-resistant prostate cancer | Kohli, Manish; Tan, Winston; Zheng, Tiantian; Wang, Amy; Montesinos, Carlos; Wong, Calven; Du, Pan; Jia, Shidong; Yadav, Siddhartha; Horvath, Lisa G.; Mahon, Kate L.; Kwan, Edmond M.; Fettke, Heidi; Yu, Jianjun; Azad, Arun A.                                                                                                                               | EBIOMEDICINE                      | 2020 | 54   |   | 1 | 1 |
| Circulating tumor DNA profile recognizes transformation to castration-resistant neuroendocrine prostate cancer                                                        | Beltran, Himisha; Romanel, Alessandro; Conteduca, Vincenza; Casiraghi, Nicola; Sigouros, Michael; Franceschini, Gian Marco; Orlando, Francesco; Fedrizzi, Tarcisio; Ku, Sheng-Yu; Dann, Emma; Alonso, Alicia; Mosquera, Juan Miguel; Sboner, Andrea; Xiang, Jenny; Elemento, Olivier; Nanus, David M.; Tagawa, Scott T.; Benelli, Matteo; Demichelis, Francesca | JOURNAL OF CLINICAL INVESTIGATION | 2020 | 130  | 4 | 1 | 1 |
| Comprehensive Analysis of AR Alterations in Circulating Tumor DNA from Patients with Advanced Prostate Cancer                                                         | Ledet, Elisa M.; Lilly, Michael B.; Sonpavde, Guru; Lin, Edwin; Nussenzweig, Roberto H.; Barata, Pedro C.; Yandell, Mark; Nagy, Rebecca J.; Kiedrowski, Lesli; Agarwal, Neeraj; Sartor, Oliver                                                                                                                                                                  | ONCOLOGIST                        | 2020 | 25   | 4 | 1 | 1 |

|                                                                                                                                                               |                                                                                                                                                                                                                                                                                                                                     |                                        |      |     |    |   |   |
|---------------------------------------------------------------------------------------------------------------------------------------------------------------|-------------------------------------------------------------------------------------------------------------------------------------------------------------------------------------------------------------------------------------------------------------------------------------------------------------------------------------|----------------------------------------|------|-----|----|---|---|
| Significance of BRCA2 and RB1 Co-loss in Aggressive Prostate Cancer Progression                                                                               | Chakraborty, Goutam; Armenia, Joshua; Mazzu, Ying Z.; Nandakumar, Subhiksha; Stopsack, Konrad H.; Atiq, Mohammad O.; Komura, Kazumasa; Jehane, Lina; Hirani, Rahim; Chadalavada, Kalyani; Yoshikawa, Yuki; Khan, Nabeela A.; Chen, Yu; Abida, Wassim; Mucci, Lorelei A.; Lee, Gwo-Shu Mary; Nanjangud, Gouri J.; Kantoff, Philip W. | CLINICAL CANCER RESEARCH               | 2020 | 26  | 8  | 1 | 1 |
| Comprehensive analysis of biomarkers for prostate cancer based on weighted gene co-expression network analysis                                                | Chen, Xuan; Wang, Jingyao; Peng, Xiqi; Liu, Kaihao; Zhang, Chunduo; Zeng, Xingzhen; Lai, Yongqing                                                                                                                                                                                                                                   | MEDICINE                               | 2020 | 99  | 14 | 1 | 1 |
| Identification of Therapeutic Vulnerabilities in Small-cell Neuroendocrine Prostate Cancer                                                                    | Corella, Alexandra N.; Ordonio, Ma Victoria Andrea Cabiliza; Coleman, Ilsa; Lucas, Jared M.; Kaipainen, Arja; Nguyen, Holly M.; Sondheim, Daniel; Brown, Lisha G.; True, Lawrence D.; Lee, John K.; MacPherson, David; Nghiem, Paul; Gulati, Roman; Morrissey, Colm; Corey, Eva; Nelson, Peter S.                                   | CLINICAL CANCER RESEARCH               | 2020 | 26  | 7  | 1 | 1 |
| Transcription levels and prognostic significance of the NF1 family members in human cancers                                                                   | Li, Yuexian; Sun, Cheng; Tan, Yonggang; Li, Lin; Zhang, Heying; Liang, Yusi; Zeng, Juan; Zou, Huawei                                                                                                                                                                                                                                | PEERJ                                  | 2020 | 8   |    | 1 | 1 |
| Plasma cell-free DNA-based predictors of response to abiraterone acetate/prednisone and prognostic factors in metastatic castration-resistant prostate cancer | Du, Meijun; Tian, Yijun; Tan, Winston; Wang, Liewei; Wang, Liguu; Kilari, Deepak; Huang, Chiang-Ching; Wang, Liang; Kohli, Manish                                                                                                                                                                                                   | PROSTATE CANCER AND PROSTATIC DISEASES | 2020 |     |    | 1 | 1 |
| Cys(2)His(2) Zinc Finger Methyl-CpG Binding Proteins: Getting a Handle on Methylated DNA                                                                      | Hodges, Amelia J.; Hudson, Nicholas O.; Buck-Koehntop, Bethany A.                                                                                                                                                                                                                                                                   | JOURNAL OF MOLECULAR BIOLOGY           | 2020 | 432 | 6  | 1 | 1 |
| Prediction of tumor location in prostate cancer tissue using a machine learning system on gene expression data                                                | Hamzeh, Osama; Alkhateeb, Abedalrhman; Zheng, Julia; Kandalam, Srinath; Rueda, Luis                                                                                                                                                                                                                                                 | BMC BIOINFORMATICS                     | 2020 | 21  |    | 1 | 1 |



|                                                                                                                                                       |                                                                                                                                                                                                                                                                                                                                                                                                                                                     |                                                        |      |    |   |   |   |
|-------------------------------------------------------------------------------------------------------------------------------------------------------|-----------------------------------------------------------------------------------------------------------------------------------------------------------------------------------------------------------------------------------------------------------------------------------------------------------------------------------------------------------------------------------------------------------------------------------------------------|--------------------------------------------------------|------|----|---|---|---|
| miR-221-3p Regulates VEGFR2 Expression in High-Risk Prostate Cancer and Represents an Escape Mechanism from Sunitinib In Vitro                        | Krebs, Markus; Solimando, Antonio Giovanni; Kalogirou, Charis; Marquardt, Andre; Frank, Torsten; Sokolakis, Ioannis; Hatzichristodoulou, Georgios; Kneitz, Susanne; Bargou, Ralf; Kuebler, Hubert; Schilling, Bastian; Spahn, Martin; Kneitz, Burkhard                                                                                                                                                                                              | JOURNAL OF CLINICAL MEDICINE                           | 2020 | 9  | 3 | 1 | 1 |
| Preanalytical Variables for the Genomic Assessment of the Cellular and Acellular Fractions of the Liquid Biopsy in a Cohort of Breast Cancer Patients | Shishido, Stephanie N.; Welter, Lisa; Rodriguez-Lee, Mariam; Kolatkar, Anand; Xu, Liya; Ruiz, Carmen; Gerdtsen, Anna S.; Restrepo-Vassalli, Sara; Carlsson, Anders; Larsen, Joe; Greenspan, Emily J.; Hwang, E. Shelley; Waitman, Kathryn R.; Nieva, Jorge; Bethel, Kelly; Hicks, James; Kuhn, Peter                                                                                                                                                | JOURNAL OF MOLECULAR DIAGNOSTICS                       | 2020 | 22 | 3 | 1 | 1 |
| Identification of PTPRR and JAG1 as key genes in castration-resistant prostate cancer by integrated bioinformatics methods                            | Wang, Ji-li; Wang, Yan; Ren, Guo-ping                                                                                                                                                                                                                                                                                                                                                                                                               | JOURNAL OF ZHEJIANG UNIVERSITY-SCIENCE B               | 2020 | 21 | 3 | 1 | 1 |
| Clinical Utility of a Genomic Classifier in Men Undergoing Radical Prostatectomy: The PRO-IMPACT Trial                                                | Gore, John L.; du Plessis, Marguerite; Zhang, Jingbin; Dai, Darlene; Thompson, Darby J. S.; Karsh, Lawrence; Lane, Brian; Franks, Michael; Chen, David Y. T.; Bianco, Fernando J., Jr.; Brown, Gordon; Clark, William; Kibel, Adam S.; Kim, Hyung; Lowrance, William; Manoharan, Murugesan; Maroni, Paul; Perrapato, Scott; Sieber, Paul; Trabulsi, Edouard J.; Waterhouse, Robert; Spratt, Daniel E.; Davicioni, Elai; Lotan, Yair; Lin, Daniel W. | PRACTICAL RADIATION ONCOLOGY                           | 2020 | 10 | 2 | 1 | 1 |
| Ethnic disparities among men with prostate cancer undergoing germline testing                                                                         | Kwon, Daniel Hyuck-Min; Borno, Hala T.; Cheng, Heather H.; Zhou, Alicia Yiran; Small, Eric Jay                                                                                                                                                                                                                                                                                                                                                      | UROLOGIC ONCOLOGY-SEMINARS AND ORIGINAL INVESTIGATIONS | 2020 | 38 | 3 | 1 | 1 |

|                                                                                                                                                    |                                                                                                                                                                                                                                                                                                                                                              |                                        |      |     |     |   |   |
|----------------------------------------------------------------------------------------------------------------------------------------------------|--------------------------------------------------------------------------------------------------------------------------------------------------------------------------------------------------------------------------------------------------------------------------------------------------------------------------------------------------------------|----------------------------------------|------|-----|-----|---|---|
| Why the UK Should Consider Gene Expression Testing in Prostate Cancer                                                                              | Dess, R. T.; Spratt, D. E.                                                                                                                                                                                                                                                                                                                                   | CLINICAL ONCOLOGY                      | 2020 | 32  | 3   | 1 | 1 |
| Cancer transcriptomic profiling from rapidly enriched circulating tumor cells                                                                      | Morrison, Gareth J.; Cunha, Alexander T.; Jojo, Nita; Xu, Yucheng; Xu, Yili; Kwok, Eric; Robinson, Peggy; Dorff, Tanya; Quinn, David; Carpten, John; Manojlovic, Zarko; Goldkorn, Amir                                                                                                                                                                       | INTERNATIONAL JOURNAL OF CANCER        | 2020 | 146 | 10  | 1 | 1 |
| Can epigenetic and inflammatory biomarkers identify clinically aggressive prostate cancer?                                                         | Santos, Pedro Bargao; Patel, Hitendra; Henrique, Rui; Felix, Ana                                                                                                                                                                                                                                                                                             | WORLD JOURNAL OF CLINICAL ONCOLOGY     | 2020 | 11  | 2   | 1 | 1 |
| TMEFF2 is a novel prognosis signature and target for endometrial carcinoma                                                                         | Gao, Lingling; Nie, Xin; Zheng, Mingjun; Li, Xiao; Guo, Qian; Liu, Juanjuan; Liu, Qing; Hao, Yingying; Lin, Bei                                                                                                                                                                                                                                              | LIFE SCIENCES                          | 2020 | 243 |     | 1 | 1 |
| Establishment and Analysis of Three-Dimensional (3D) Organoids Derived from Patient Prostate Cancer Bone Metastasis Specimens and their Xenografts | Lee, Sanghee; Burner, Danielle N.; Mendoza, Theresa R.; Muldong, Michelle T.; Arreola, Catalina; Wu, Christina N.; Cacalano, Nicholas A.; Kulidjian, Anna A.; Kane, Christopher J.; Jamieson, Christina A. M.                                                                                                                                                | JOVE-JOURNAL OF VISUALIZED EXPERIMENTS | 2020 |     | 156 | 1 | 1 |
| A NF-kappa B-Activin A signaling axis enhances prostate cancer metastasis                                                                          | Chen, Lanpeng; De Menna, Marta; Groenewoud, Arwin; Thalmann, George N.; Kruithof-de Julio, Marianna; Snaar-Jagalska, B. Ewa                                                                                                                                                                                                                                  | ONCOGENE                               | 2020 | 39  | 8   | 1 | 1 |
| DeepCOP: deep learning-based approach to predict gene regulating effects of small molecules                                                        | Woo, Godwin; Fernandez, Michael; Hsing, Michael; Lack, Nathan A.; Cavga, Ayse Derya; Cherkasov, Artem                                                                                                                                                                                                                                                        | BIOINFORMATICS                         | 2020 | 36  | 3   | 1 | 1 |
| Activation of beta-Catenin Cooperates with Loss of Pten to Drive AR-Independent Castration-Resistant Prostate Cancer                               | Patel, Rachana; Brzezinska, Elspeth A.; Repiscak, Peter; Ahmad, Imran; Mui, Ernest; Gao, Meiling; Blomme, Arnaud; Harle, Victoria; Tan, Ee Hong; Malviya, Gaurav; Mrowinska, Agata; Loveridge, Carolyn J.; Rushworth, Linda K.; Edwards, Joanne; Ntala, Chara; Nixon, Colin; Hedley, Ann; Mackay, Gillian; Tardito, Saverio; Sansom, Owen J.; Leung, Hing Y. | CANCER RESEARCH                        | 2020 | 80  | 3   | 1 | 1 |

|                                                                                                                                                                                                                                 |                                                                                                                                                                                                                                                                                                                                                                                                                                       |                                                   |      |     |   |   |   |
|---------------------------------------------------------------------------------------------------------------------------------------------------------------------------------------------------------------------------------|---------------------------------------------------------------------------------------------------------------------------------------------------------------------------------------------------------------------------------------------------------------------------------------------------------------------------------------------------------------------------------------------------------------------------------------|---------------------------------------------------|------|-----|---|---|---|
| Advancing Biomarker Development Through Convergent Engagement: Summary Report of the 2nd International Danube Symposium on Biomarker Development, Molecular Imaging and Applied Diagnostics; March 14-16, 2018; Vienna, Austria | Lim, M. S.; Beyer, Thomas; Babayan, A.; Bergmann, M.; Brehme, M.; Buyx, A.; Czernin, J.; Egger, G.; Elenitoba-Johnson, K. S. J.; Gueckel, B.; Jacan, A.; Haslacher, H.; Hicks, R. J.; Kenner, L.; Langanke, M.; Mitterhauser, M.; Pichler, B. J.; Salih, H. R.; Schibli, R.; Schulz, S.; Simecek, J.; Simon, J.; Soares, M. O.; Stelzl, U.; Wadsak, W.; Zatloukal, K.; Zeitlinger, M.; Hacker, M.                                     | MOLECULAR IMAGING AND BIOLOGY                     | 2020 | 22  | 1 | 1 | 1 |
| NMR-based metabolomics analysis identifies discriminatory metabolic disturbances in tissue and biofluid samples for progressive prostate cancer                                                                                 | Zheng, Hong; Dong, Baijun; Ning, Jie; Shao, Xiaoguang; Zhao, Liangcai; Jiang, Qiaoying; Ji, Hui; Cai, Aimin; Xue, Wei; Gao, Hongchang                                                                                                                                                                                                                                                                                                 | CLINICA CHIMICA ACTA                              | 2020 | 501 |   | 1 | 1 |
| Improving diagnosis of genitourinary cancers: Biomarker discovery strategies through mass spectrometry-based metabolomics                                                                                                       | Manzi, Malena; Riquelme, Gabriel; Zabalegui, Nicolas; Eugenia Monge, Maria                                                                                                                                                                                                                                                                                                                                                            | JOURNAL OF PHARMACEUTICAL AND BIOMEDICAL ANALYSIS | 2020 | 178 |   | 1 | 1 |
| Genetic Testing in Prostate Cancer                                                                                                                                                                                              | Sokolova, Alexandra O.; Cheng, Heather H.                                                                                                                                                                                                                                                                                                                                                                                             | CURRENT ONCOLOGY REPORTS                          | 2020 | 22  | 1 | 1 | 1 |
| Multi-omic serum biomarkers for prognosis of disease progression in prostate cancer                                                                                                                                             | Kiebish, Michael A.; Cullen, Jennifer; Mishra, Prachi; Ali, Amina; Milliman, Eric; Rodrigues, Leonardo O.; Chen, Emily Y.; Tolstikov, Vladimir; Zhang, Lixia; Panagopoulos, Kiki; Shah, Punit; Chen, Yongmei; Petrovics, Gyorgy; Rosner, Inger L.; Sesterhenn, Isabell A.; McLeod, David G.; Granger, Elder; Sarangarajan, Rangaprasad; Akmaev, Viatcheslav; Srinivasan, Alagarsamy; Srivastava, Shiv; Narain, Niven R.; Dobi, Albert | JOURNAL OF TRANSLATIONAL MEDICINE                 | 2020 | 18  | 1 | 1 | 1 |

|                                                                                                                                          |                                                                                                                                                                                                                                                          |                                                               |      |      |    |   |   |
|------------------------------------------------------------------------------------------------------------------------------------------|----------------------------------------------------------------------------------------------------------------------------------------------------------------------------------------------------------------------------------------------------------|---------------------------------------------------------------|------|------|----|---|---|
| Cyclic Multiplexed-Immunofluorescence (cmIF), a Highly Multiplexed Method for Single-Cell Analysis                                       | Eng, Jennifer; Thibault, Guillaume; Luoh, Shih-Wen; Gray, Joe W.; Chang, Young Hwan; Chin, Koei                                                                                                                                                          | BIOMARKERS FOR IMMUNOTHERAPY OF CANCER: METHODS AND PROTOCOLS | 2020 | 2055 |    | 1 | 1 |
| Differential Characteristics of HMGB2 Versus HMGB1 and their Perspectives in Ovary and Prostate Cancer                                   | Camara-Quilez, Maria; Barreiro-Alonso, Aida; Rodriguez-Bemonte, Esther; Quindos-Varela, Maria; Esperanza Cerdan, M.; Lamas-Maceiras, Monica                                                                                                              | CURRENT MEDICINAL CHEMISTRY                                   | 2020 | 27   | 20 | 1 | 1 |
| 150 years of the periodic table: New medicines and diagnostic agents                                                                     | Imberti, Cinzia; Sadler, Peter J.                                                                                                                                                                                                                        | MEDICINAL CHEMISTRY                                           | 2020 | 75   |    | 1 | 1 |
| Urinary prostate-specific antigen and microseminoprotein-beta levels in men with and without prostate cancer: A prospective cohort study | Shrivastava, Prashant; Garg, Harshit; Bhat, Madhusudan; Dinda, Amit; Kumar, Rajeev                                                                                                                                                                       | INDIAN JOURNAL OF UROLOGY                                     | 2020 | 36   | 1  | 1 | 1 |
| Urothelial Carcinoma Detection Based on Copy Number Profiles of Urinary Cell-Free DNA by Shallow Whole-Genome Sequencing                 | Ge, Guangzhe; Peng, Ding; Guan, Bao; Zhou, Yuanyuan; Gong, Yanqing; Shi, Yue; Hao, Xueyu; Xu, Zhengzheng; Qi, Jie; Lu, Huan; Zhang, Xiaoyun; Zhan, Yonghao; Li, Yifan; Wu, Yucai; Ding, Guangpu; Shen, Qi; He, Qun; Li, Xuesong; Zhou, Liqun; Ci, Weimin | CLINICAL CHEMISTRY                                            | 2020 | 66   | 1  | 1 | 1 |
| Unravelling the proteomic landscape of extracellular vesicles in prostate cancer by density-based fractionation of urine                 | Dhondt, Bert; Geeurickx, Edward; Tulkens, Joeri; Van Deun, Jan; Vergauwen, Glenn; Lippens, Lien; Miinalainen, Ilkka; Rappu, Pekka; Heino, Jyrki; Ost, Piet; Lumen, Nicolaas; De Wever, Olivier; Hendrix, An                                              | JOURNAL OF EXTRACELLULAR VESICLES                             | 2020 | 9    | 1  | 1 | 1 |
| The Panel of 12 Cell-Free MicroRNAs as Potential Biomarkers in Prostate Neoplasms                                                        | Konoshenko, Maria Yu; Lekchnov, Evgeniy A.; Bryzgunova, Olga E.; Zaporozhchenko, Ivan A.; Yarmoschuk, Sergey, V; Pashkovskaya, Oksana A.; Pak, Svetlana, V; Laktionov, Pavel P.                                                                          | DIAGNOSTICS                                                   | 2020 | 10   | 1  | 1 | 1 |
| Genome-wide analysis reveals the emerging roles of long non-coding RNAs in cancer (Review)                                               | Ren, Xiaoxia                                                                                                                                                                                                                                             | ONCOLOGY LETTERS                                              | 2020 | 19   | 1  | 1 | 1 |

|                                                                                                                                      |                                                                                                                                                                                                |                                                   |      |     |   |   |     |
|--------------------------------------------------------------------------------------------------------------------------------------|------------------------------------------------------------------------------------------------------------------------------------------------------------------------------------------------|---------------------------------------------------|------|-----|---|---|-----|
| Network Pharmacology-Based Study on the Molecular Biological Mechanism of Action for Compound Kushen Injection in Anti-Cancer Effect | He, Ruirong; Ou, Shuya; Chen, Shichun; Ding, Shaobo                                                                                                                                            | MEDICAL SCIENCE MONITOR                           | 2020 | 26  |   | 1 | 1   |
| The Genomic and Molecular Pathology of Prostate Cancer: Clinical Implications for Diagnosis, Prognosis, and Therapy                  | Faisal, Farzana A.; Lotan, Tamara L.                                                                                                                                                           | ADVANCES IN ANATOMIC PATHOLOGY                    | 2020 | 27  | 1 | 1 | 1   |
| Weighted gene co-expression network analysis identifies CCNA2 as a treatment target of prostate cancer through inhibiting cell cycle | Yang, Rui; Du, Yang; Wang, Lei; Chen, Zhiyuan; Liu, Xiuhe                                                                                                                                      | JOURNAL OF CANCER                                 | 2020 | 11  | 5 | 1 | 1   |
| Evaluation of statistical techniques to normalize mass spectrometry-based urinary metabolomics data                                  | Cook, Tyler; Ma, Yinfa; Gamagedara, Sanjeewa                                                                                                                                                   | JOURNAL OF PHARMACEUTICAL AND BIOMEDICAL ANALYSIS | 2020 | 177 |   | 1 | 1   |
| Noncanonical Wnt as a prognostic marker in prostate cancer: you can't always get what you Wnt                                        | Fisher, Rebecca R.; Pleskow, Haley M.; Bedingfield, Kathleen; Miyamoto, David T.                                                                                                               | EXPERT REVIEW OF MOLECULAR DIAGNOSTICS            | 2020 | 20  | 2 | 1 | 0,5 |
| Prostate cancer research: The next generation; report from the 2019 Coffey-Holden Prostate Cancer Academy Meeting                    | Miyahira, Andrea K.; Sharp, Adam; Ellis, Leigh; Jones, Jennifer; Kaochar, Salma; Larman, H. Benjamin; Quigley, David A.; Ye, Huihui; Simons, Jonathan W.; Pienta, Kenneth J.; Soule, Howard R. | PROSTATE                                          | 2020 | 80  | 2 | 1 | 0,5 |

|                                                                                                                                                                             |                                                                                                                                                                                                                                                                                                                                                                                                                                             |                            |      |    |   |   |     |
|-----------------------------------------------------------------------------------------------------------------------------------------------------------------------------|---------------------------------------------------------------------------------------------------------------------------------------------------------------------------------------------------------------------------------------------------------------------------------------------------------------------------------------------------------------------------------------------------------------------------------------------|----------------------------|------|----|---|---|-----|
| Expression of CCCTC-binding factor (CTCF) is linked to poor prognosis in prostate cancer                                                                                    | Hoeflmayer, Doris; Steinhoff, Amelie; Hube-Magg, Claudia; Kluth, Martina; Simon, Ronald; Burandt, Eike; Tsourlakis, Maria Christina; Minner, Sarah; Sauter, Guido; Buescheck, Franziska; Wilczak, Waldemar; Steurer, Stefan; Huland, Hartwig; Graefen, Markus; Haese, Alexander; Heinzer, Hans; Schlomm, Thorsten; Jacobsen, Frank; Hinsch, Andrea; Poos, Alexandra M.; Oswald, Marcus; Rippe, Karsten; Koenig, Rainer; Schroeder, Cornelia | MOLECULAR ONCOLOGY         | 2020 | 14 | 1 | 1 | 0,5 |
| Discordant and heterogeneous clinically relevant genomic alterations in circulating tumor cells vs plasma DNA from men with metastatic castration resistant prostate cancer | Gupta, Santosh; Hovelson, Daniel H.; Kemeny, Gabor; Halabi, Susan; Foo, Wen-Chi; Anand, Monika; Somarelli, Jason A.; Tomlins, Scott A.; Antonarakis, Emmanuel S.; Luo, Jun; Dittamore, Ryan, V; George, Daniel J.; Rothwell, Colin; Nanus, David M.; Armstrong, Andrew J.; Gregory, Simon G.                                                                                                                                                | GENES CHROMOSOMES & CANCER | 2020 | 59 | 4 | 1 | 0,5 |
| The molecular function of kallikrein-related peptidase 14 demonstrates a key modulatory role in advanced prostate cancer                                                    | Kryza, Thomas; Bock, Nathalie; Lovell, Scott; Rockstroh, Anja; Lehman, Melanie L.; Lesner, Adam; Panchadsaram, Janaththani; Silva, Lakmali Munasinghage; Srinivasan, Srilakshmi; Snell, Cameron E.; Williams, Elizabeth D.; Fazli, Ladan; Gleave, Martin; Batra, Jyotsna; Nelson, Colleen; Tate, Edward W.; Harris, Jonathan; Hooper, John D.; Clements, Judith A.                                                                          | MOLECULAR ONCOLOGY         | 2020 | 14 | 1 | 1 | 0,5 |
| Correlation between cribriform/intraductal prostatic adenocarcinoma and percent Gleason pattern 4 to a 22-gene genomic classifier                                           | Taylor, Alexander S.; Morgan, Todd M.; Wallington, David G.; Chinnaiyan, Arul M.; Spratt, Daniel E.; Mehra, Rohit                                                                                                                                                                                                                                                                                                                           | PROSTATE                   | 2020 | 80 | 2 | 1 | 0,5 |

|                                                                                                                                                |                                                                                                                                                                                                                                                                                                                                                              |                                                       |      |      |   |   |   |
|------------------------------------------------------------------------------------------------------------------------------------------------|--------------------------------------------------------------------------------------------------------------------------------------------------------------------------------------------------------------------------------------------------------------------------------------------------------------------------------------------------------------|-------------------------------------------------------|------|------|---|---|---|
| Mithramycin suppresses DNA damage repair via targeting androgen receptor in prostate cancer                                                    | Wang, Shan; Gilbreath, Collin; Kollipara, Rahul K.; Sonavane, Rajni; Huo, Xiaofang; Yenerall, Paul; Das, Amit; Ma, Shihong; Raj, Ganesh, V; Kittler, Ralf                                                                                                                                                                                                    | CANCER LETTERS                                        | 2020 | 488  |   | 0 | 0 |
| Paper-based ITP technology: An application to specific cancer-derived exosome detection and analysis                                           | Guo, Shuang; Xu, Jie; Estell, Alexander Pettit; Ivory, Cornelius F.; Du, Dan; Lin, Yuehe; Dong, Wen-Ji                                                                                                                                                                                                                                                       | BIOSENSORS & BIOELECTRONICS                           | 2020 | 164  |   | 0 | 0 |
| Deregulated PTEN/PI3K/AKT/mTOR signaling in prostate cancer: Still a potential druggable target?                                               | Braglia, Luca; Zavatti, Manuela; Vinceti, Marco; Martelli, Alberto M.; Marmioli, Sandra                                                                                                                                                                                                                                                                      | BIOCHIMICA ET BIOPHYSICA ACTA-MOLECULAR CELL RESEARCH | 2020 | 1867 | 9 | 0 | 0 |
| Identification of a natural compound, sesamin, as a novel TRPM8 antagonist with inhibitory effects on prostate adenocarcinoma                  | Sui, Yutong; Li, Shiyong; Zhao, Yahui; Liu, Qing; Qiao, Yanjiang; Feng, Li; Li, Sheng                                                                                                                                                                                                                                                                        | FITOTERAPIA                                           | 2020 | 145  |   | 0 | 0 |
| Quantitative and qualitative impairments in dendritic cell subsets of patients with ovarian or prostate cancer                                 | Mastelic-Gavillet, Beatris; Sarivalasis, Apostolos; Lozano, Leyder Elena; Wyss, Tania; Inoges, Susana; de Vries, Ingrid Jolanda Monique; Dartiguenave, Florence; Jichlinski, Patrice; Derre, Laurent; Coukos, George; Melero, Ignacio; Harari, Alexandre; Romero, Pedro; Vigano, Selena; Kandalaf, Lana Elias                                                | EUROPEAN JOURNAL OF CANCER                            | 2020 | 135  |   | 0 | 0 |
| An in vivo functional genomics screen of nuclear receptors and their co-regulators identifies FOXA1 as an essential gene in lung tumorigenesis | Hight, Suzie K.; Mootz, Allison; Kollipara, Rahul K.; McMillan, Elizabeth; Yenerall, Paul; Otaki, Yoichi; Li, Long-Shan; Avila, Kimberley; Peyton, Michael; Rodriguez-Canales, Jaime; Mino, Barbara; Villalobos, Pamela; Girard, Luc; Dospoy, Patrick; Larsen, Jill; White, Michael A.; Heymach, John V.; Wistuba, Ignacio I.; Kittler, Ralf; Minna, John D. | NEOPLASIA                                             | 2020 | 22   | 8 | 0 | 0 |

|                                                                                                                                                        |                                                                                                                                                                                                                                        |                                            |      |     |  |   |   |
|--------------------------------------------------------------------------------------------------------------------------------------------------------|----------------------------------------------------------------------------------------------------------------------------------------------------------------------------------------------------------------------------------------|--------------------------------------------|------|-----|--|---|---|
| Ampholine immobilized polymer microspheres for increasing coverage of human urinary proteome                                                           | Deng, Nan; Chen, Yuanbo; Liang, Zhen; Bian, Yangyang; Wang, Bing; Sui, Zhigang; Zhang, Xiaodan; Yang, Kaiguang; Zhang, Lihua; Zhang, Yukui                                                                                             | TALANTA                                    | 2020 | 215 |  | 0 | 0 |
| Identification of six novel alternative transcripts of the human kallikrein-related peptidase 15 (KLK15), using 3' RACE and high-throughput sequencing | Adamopoulos, Panagiotis G.; Koukouzeli, Fotini E.; Kontos, Christos K.; Scorilas, Andreas                                                                                                                                              | GENE                                       | 2020 | 749 |  | 0 | 0 |
| Melatonin, an ubiquitous metabolic regulator: functions, mechanisms and effects on circadian disruption and degenerative diseases                      | Socaciu, Andreea Iulia; Ionut, Razvan; Socaciu, Mihai Adrian; Ungur, Andreea Petra; Barsan, Maria; Chiorean, Angelica; Socaciu, Carmen; Rajnovaeu, Armand Gabriel                                                                      | REVIEWS IN ENDOCRINE & METABOLIC DISORDERS | 2020 |     |  | 0 | 0 |
| Zonal regulation of collagen-type proteins and posttranslational modifications in prostatic benign and cancer tissues by imaging mass spectrometry     | Angel, Peggi M.; Spruill, Laura; Jefferson, Melanie; Bethard, Jennifer R.; Ball, Lauren E.; Hughes-Halbert, Chanita; Drake, Richard R.                                                                                                 | PROSTATE                                   | 2020 |     |  | 0 | 0 |
| Identifying and treating ROBO1(-ve)/DOCK1(+ve) prostate cancer: An aggressive cancer subtype prevalent in African American patients                    | Ferrari, Marina G.; Ganaie, Arsheed A.; Shabenah, Ashraf; Mansini, Adrian P.; Wang, Li; Murugan, Paari; Davicioni, Elai; Wang, Jinhua; Deng, Yibin; Hoepfner, Luke H.; Warlick, Christopher A.; Konety, Badrinath R.; Saleem, Mohammad | PROSTATE                                   | 2020 |     |  | 0 | 0 |



|                                                                                                                                                                                 |                                                                                                                                                                                                                                                                                                                                                                                                                                                                                                                                         |                               |      |     |    |   |   |
|---------------------------------------------------------------------------------------------------------------------------------------------------------------------------------|-----------------------------------------------------------------------------------------------------------------------------------------------------------------------------------------------------------------------------------------------------------------------------------------------------------------------------------------------------------------------------------------------------------------------------------------------------------------------------------------------------------------------------------------|-------------------------------|------|-----|----|---|---|
| Secreted Frizzled-Related Protein 4 (SFRP4) Is an Independent Prognostic Marker in Prostate Cancers LackingTMPRSS2: ERGFusions                                                  | Bernreuther, Christian; Daghigh, Ferdous; Moeller, Katharina; Hube-Magg, Claudia; Lennartz, Maximilian; Lutz, Florian; Rico, Sebastian Dwertmann; Fraune, Christoph; Dum, David; Luebke, Andreas M.; Eichenauer, Till; Moeller-Koop, Christina; Schlomm, Thorsten; Wittmer, Corinna; Huland, Hartwig; Heinzer, Hans; Graefen, Markus; Haese, Alexander; Burandt, Eike; Tsourlakis, Maria Christina; Clauditz, Till S.; Hoeflmayer, Doris; Izbicki, Jakob R.; Simon, Ronald; Sauter, Guido; Minner, Sarah; Steurer, Stefan; Meiners, Jan | PATHOLOGY & ONCOLOGY RESEARCH | 2020 |     |    | 0 | 0 |
| The CHK1 inhibitor MU380 significantly increases the sensitivity of human docetaxel-resistant prostate cancer cells to gemcitabine through the induction of mitotic catastrophe | Drapela, Stanislav; Khirsariya, Prashant; van Weerden, Wytse M.; Fedr, Radek; Suchankova, Tereza; Buzova, Diana; Cerveny, Jan; Hampl, Ales; Puh, Martin; Watson, William R.; Culig, Zoran; Krejci, Lumir; Paruch, Kamil; Soucek, Karel                                                                                                                                                                                                                                                                                                  | MOLECULAR ONCOLOGY            | 2020 |     |    | 0 | 0 |
| Microtubule Engagement with Taxane Is Altered in Taxane-Resistant Gastric Cancer                                                                                                | Galletti, Giuseppe; Zhang, Chao; Gjyze, Ada; Cleveland, Kyle; Zhang, Jiaren; Powell, Sarah; Thakkar, Prashant, V; Betel, Doron; Shah, Manish A.; Giannakakou, Paraskevi                                                                                                                                                                                                                                                                                                                                                                 | CLINICAL CANCER RESEARCH      | 2020 | 26  | 14 | 0 | 0 |
| Associations of IL6 rs1800795, BLK rs13277113, TIMP3 rs9621532, IL1RL1 rs1041973 and IL1RAP rs4624606 single gene polymorphisms with laryngeal squamous cell carcinoma          | Pasvenskaite, Agne; Vilkeviciute, Alvita; Liutkeviciene, Rasa; Gedvilaite, Greta; Liutkevicius, Vyktintas; Uloza, Virgilijus                                                                                                                                                                                                                                                                                                                                                                                                            | GENE                          | 2020 | 747 |    | 0 | 0 |
| Targeting CPT1B as a potential therapeutic strategy in castration-resistant and enzalutamide-resistant prostate cancer                                                          | Abudurexiti, Mierxiti; Zhu, Wenkai; Wang, Yuchen; Wang, Jun; Xu, Wenhao; Huang, Yongqiang; Zhu, Yao; Shi, Guohai; Zhang, Hailiang; Zhu, Yiping; Shen, Yijun; Dai, Bo; Wan, Fangning; Lin, Guowen; Ye, Dingwei                                                                                                                                                                                                                                                                                                                           | PROSTATE                      | 2020 | 80  | 12 | 0 | 0 |

|                                                                                                                             |                                                                                                                                                                                                                            |                                              |      |    |   |   |   |
|-----------------------------------------------------------------------------------------------------------------------------|----------------------------------------------------------------------------------------------------------------------------------------------------------------------------------------------------------------------------|----------------------------------------------|------|----|---|---|---|
| Prostate cancer-derived holoclones: a novel and effective model for evaluating cancer stemness                              | Flynn, Louise; Barr, Martin P.; Baird, Anne-Marie; Smyth, Paul; Casey, Orla M.; Blackshields, Gordon; Greene, John; Pennington, Stephen R.; Hams, Emily; Fallon, Padraic G.; O'Leary, John; Sheils, Orla; Finn, Stephen P. | SCIENTIFIC REPORTS                           | 2020 | 10 | 1 | 0 | 0 |
| Acute Promyelocytic Leukemia After Radium-223 Exposure for Prostate Cancer in a Chemotherapy-Naive Patient                  | Perrone, Salvatore; Ortu La Barbera, Elettra; Ottone, Tiziana; Capriata, Marcello; Passucci, Mauro; Filippi, Luca; Bagni, Oreste; Voso, Maria Teresa; Cimino, Giuseppe                                                     | NUCLEAR MEDICINE AND MOLECULAR IMAGING       | 2020 |    |   | 0 | 0 |
| Systematic profiling of alternative splicing signature reveals prognostic predictor for prostate cancer                     | Zhao, Jiyu; Chang, Luchen; Gu, Xianen; Liu, Jia; Sun, Bei; Wei, Xi                                                                                                                                                         | CANCER SCIENCE                               | 2020 |    |   | 0 | 0 |
| In silicodocking of phytocompounds to identify potent inhibitors of signaling pathways involved in prostate cancer          | Jonnalagadda, Bhavana; Arockiasamy, Sumathy; Vetrivel, Umashankar; Abhinand, P. A.                                                                                                                                         | JOURNAL OF BIOMOLECULAR STRUCTURE & DYNAMICS | 2020 |    |   | 0 | 0 |
| An organoid-based drug screening identified a menin-MLL inhibitor for endometrial cancer through regulating the HIF pathway | Chen, Jingyao; Zhao, Lei; Peng, Hongling; Dai, Siqi; Quan, Yuan; Wang, Manli; Wang, Jian; Bi, Zhanying; Zheng, Ying; Zhou, Shengtao; Liu, Yu; Chen, Chong; Na, Feifei                                                      | CANCER GENE THERAPY                          | 2020 |    |   | 0 | 0 |
| Decoding the evolutionary response to prostate cancer therapy by plasma genome sequencing                                   | Ramesh, Naveen; Sei, Emi; Tsai, Pei Ching; Bai, Shanshan; Zhao, Yuehui; Troncoso, Patricia; Corn, Paul G.; Logothetis, Christopher; Zurita, Amado J.; Navin, Nicholas E.                                                   | GENOME BIOLOGY                               | 2020 | 21 | 1 | 0 | 0 |
| Cancer-driven IgG promotes the development of prostate cancer though the SOX2-CIgG pathway                                  | Qin, Caipeng; Sheng, Zhengzuo; Huang, Xinmei; Tang, Jingshu; Liu, Yang; Xu, Tao; Qiu, Xiaoyan                                                                                                                              | PROSTATE                                     | 2020 |    |   | 0 | 0 |

|                                                                                                                            |                                                                                                                                                                                                                                                                                                                                                              |                              |      |    |   |   |   |
|----------------------------------------------------------------------------------------------------------------------------|--------------------------------------------------------------------------------------------------------------------------------------------------------------------------------------------------------------------------------------------------------------------------------------------------------------------------------------------------------------|------------------------------|------|----|---|---|---|
| Reduced KLK2 expression is a strong and independent predictor of poor prognosis in ERG-negative prostate cancer            | Bonk, Sarah; Kluth, Martina; Jansen, Kristina; Hube-Magg, Claudia; Makrypidi-Fraune, Georgia; Hoeflmayer, Doris; Weidemann, Soeren; Moeller, Katharina; Uhlig, Ria; Buescheck, Franziska; Luebke, Andreas M.; Burandt, Eike; Clauditz, Till S.; Steurer, Stefan; Schlomm, Thorsten; Huland, Hartwig; Heinzer, Hans; Sauter, Guido; Simon, Ronald; Dum, David | PROSTATE                     | 2020 |    |   | 0 | 0 |
| Patterns of stemness-associated markers in the development of castration-resistant prostate cancer                         | Federer-Gsponer, Joel R.; Mueller, David C.; Zellweger, Tobias; Eggimann, Maurice; Marston, Katharina; Ruiz, Christian; Seifert, Hans-Helge; Rentsch, Cyrill A.; Bubendorf, Lukas; Le Magnen, Clementine                                                                                                                                                     | PROSTATE                     | 2020 |    |   | 0 | 0 |
| Proteomics Analysis of Formalin Fixed Paraffin Embedded Tissues in the Investigation of Prostate Cancer                    | Mantsiou, Anna; Makridakis, Manousos; Fasoulakis, Konstantinos; Katafigiotis, Ioannis; Constantinides, Constantinos A.; Zoidakis, Jerome; Roubelakis, Maria G.; Vlahou, Antonia; Lygirou, Vasiliki                                                                                                                                                           | JOURNAL OF PROTEOME RESEARCH | 2020 | 19 | 7 | 0 | 0 |
| HILIC-MRM-MS for Linkage-Specific Separation of Sialylated Glycopeptides to Quantify Prostate-Specific Antigen Proteoforms | van der Burgt, Yuri E. M.; Siliakus, Kasper M.; Cobbaert, Christa M.; Ruhaak, L. Renee                                                                                                                                                                                                                                                                       | JOURNAL OF PROTEOME RESEARCH | 2020 | 19 | 7 | 0 | 0 |

|                                                                                                                                       |                                                                                                                                                                                                                                                                                                                                                                                                                                                                                                                                                                                                                                                                                                                                                                                                                  |                                       |      |    |    |   |   |
|---------------------------------------------------------------------------------------------------------------------------------------|------------------------------------------------------------------------------------------------------------------------------------------------------------------------------------------------------------------------------------------------------------------------------------------------------------------------------------------------------------------------------------------------------------------------------------------------------------------------------------------------------------------------------------------------------------------------------------------------------------------------------------------------------------------------------------------------------------------------------------------------------------------------------------------------------------------|---------------------------------------|------|----|----|---|---|
| A Custom Genotyping Array Reveals Population-Level Heterogeneity for the Genetic Risks of Prostate Cancer and Other Cancers in Africa | Harlemon, Maxine; Ajayi, Olabode; Kachambwa, Paidamoyo; Kim, Michelle S.; Simonti, Corinne N.; Quiver, Melanie H.; Petersen, Desiree C.; Mittal, Anuradha; Fernandez, Pedro W.; Hsing, Ann W.; Baichoo, Shakuntala; Agalliu, Ilir; Jalloh, Mohamed; Gueye, Serigne M.; Snyder, Nana Yaa F.; Adusei, Ben; Mensah, James E.; Abrahams, Afua O. D.; Adebisi, Akindele O.; Orunmuyi, Akin T.; Aisuodionoe-Shadrach, Oseremen I.; Nwegbu, Maxwell M.; Joffe, Maureen; Chen, Wenlong C.; Irusen, Hayley; Neugut, Alfred I.; Quintana, Yuri; Seutloali, Moleboheng; Fadipe, Mayowa B.; Warren, Christopher; Woehrmann, Marcos H.; Zhang, Peng; Ongaco, Chrissie M.; Mawhinney, Michelle; McBride, Jo; Andrews, Caroline V.; Adams, Marcia; Pugh, Elizabeth; Rebbeck, Timothy R.; Petersen, Lindsay N.; Lachance, Joseph | CANCER RESEARCH                       | 2020 | 80 | 13 | 0 | 0 |
| Oncogenic Genomic Alterations, Clinical Phenotypes, and Outcomes in Metastatic Castration-Sensitive for Prostate Cancer               | Stopsack, Konrad H.; Nandakumar, Subhiksha; Wibmer, Andreas G.; Haywood, Samuel; Weg, Emily S.; Barnett, Ethan S.; Kim, Chloe J.; Carbone, Emily A.; Vasselmann, Samantha E.; Nguyen, Bastien; Hullings, Melanie A.; Scher, Howard I.; Morris, Michael J.; Solit, David B.; Schultz, Nikolaus; Kantoff, Philip W.; Abida, Wassim                                                                                                                                                                                                                                                                                                                                                                                                                                                                                 | CLINICAL CANCER RESEARCH              | 2020 | 26 | 13 | 0 | 0 |
| Transcriptomic analysis reveals that heat shock protein 90 alpha is a potential diagnostic and prognostic biomarker for cancer        | Chen, Wei; Li, Guanghua; Peng, Jianjun; Dai, Weigang; Su, Qiao; He, Yulong                                                                                                                                                                                                                                                                                                                                                                                                                                                                                                                                                                                                                                                                                                                                       | EUROPEAN JOURNAL OF CANCER PREVENTION | 2020 | 29 | 4  | 0 | 0 |

|                                                                                                                                      |                                                                                                                                                                                                                                 |                                        |      |     |   |   |   |
|--------------------------------------------------------------------------------------------------------------------------------------|---------------------------------------------------------------------------------------------------------------------------------------------------------------------------------------------------------------------------------|----------------------------------------|------|-----|---|---|---|
| A Network Pharmacology Approach to Explore the Potential Mechanisms of Huangqin-Baishao Herb Pair in Treatment of Cancer             | Xu, Tian; Wang, Qingguo; Liu, Min                                                                                                                                                                                               | MEDICAL SCIENCE MONITOR                | 2020 | 26  |   | 0 | 0 |
| p53/PGC-1 alpha-mediated mitochondrial dysfunction promotes PC3 prostate cancer cell apoptosis                                       | Li, Jiuling; Li, Yany; Chen, Lanlan; Yu, Bingbing; Xue, Yanan; Guo, Rui; Su, Jing; Liu, Yanan; Sun, Liankun                                                                                                                     | MOLECULAR MEDICINE REPORTS             | 2020 | 22  | 1 | 0 | 0 |
| Novel approach to therapeutic targeting of castration-resistant prostate cancer                                                      | Shankar, Eswar; Franco, Daniel; Iqbal, Omair; El-Hayek, Victoria; Gupta, Sanjay                                                                                                                                                 | MEDICAL HYPOTHESES                     | 2020 | 140 |   | 0 | 0 |
| Anti-prostate cancer activity of a nanoformulation of the spleen tyrosine kinase (SYK) inhibitor C61                                 | Sahin, Taha Koray; Aktepe, Oktay Halit; Uckun, Fatih Mehmet; Yalcin, Suayib                                                                                                                                                     | ANTI-CANCER DRUGS                      | 2020 | 31  | 6 | 0 | 0 |
| Roles of lncRNAs in cancer: Focusing on angiogenesis                                                                                 | Jin, Ke-Tao; Yao, Jia-Yu; Fang, Xing-Liang; Di, Hua; Ma, Ying-Yu                                                                                                                                                                | LIFE SCIENCES                          | 2020 | 252 |   | 0 | 0 |
| An overview of current and emerging diagnostic, staging and prognostic markers for prostate cancer                                   | Broenimann, Stephan; Pradere, Benjamin; Karakiewicz, Pierre; Abufaraj, Mohammad; Briganti, Alberto; Shariat, Shahrokh F.                                                                                                        | EXPERT REVIEW OF MOLECULAR DIAGNOSTICS | 2020 |     |   | 0 | 0 |
| Prostate cancer management: long-term beliefs, epidemic developments in the early twenty-first century and 3PM dimensional solutions | Kucera, Radek; Pecen, Ladislav; Topolcan, Ondrej; Dahal, Anshu Raj; Costigliola, Vincenzo; Giordano, Frank A.; Golubnitschaja, Olga                                                                                             | EPMA JOURNAL                           | 2020 |     |   | 0 | 0 |
| Cytochrome P450 1B1 polymorphism drives cancer cell stemness and patient outcome in head-and-neck carcinoma                          | Le Morvan, Valerie; Richard, Elodie; Cadars, Maud; Fessart, Delphine; Broca-Brisson, Lea; Auzanneau, Celine; Pasquies, Alban; Modesto, Anouchka; Lusque, Amelie; Mathoulin-Pelissier, Simone; Lansiaux, Amelie; Robert, Jacques | BRITISH JOURNAL OF CANCER              | 2020 |     |   | 0 | 0 |
| Blood-derived DNA methylation predictors of mortality discriminate tumor and healthy tissue in multiple organs                       | Zhang, Yan; Bewerunge-Hudler, Melanie; Schick, Matthias; Burwinkel, Barbara; Herpel, Esther; Hoffmeister, Michael; Brenner, Hermann                                                                                             | MOLECULAR ONCOLOGY                     | 2020 |     |   | 0 | 0 |

|                                                                                                                           |                                                                                                                                                                                                                                                                                                                                   |                                 |      |     |    |   |   |
|---------------------------------------------------------------------------------------------------------------------------|-----------------------------------------------------------------------------------------------------------------------------------------------------------------------------------------------------------------------------------------------------------------------------------------------------------------------------------|---------------------------------|------|-----|----|---|---|
| PKMYT1 is associated with prostate cancer malignancy and may serve as a therapeutic target                                | Wang, Jianan; Wang, Lin; Chen, Saipeng; Peng, Huahong; Xiao, Longfei; Du, E.; Liu, Yan; Lin, Dong; Wang, Yuzhuo; Xu, Yong; Yang, Kuo                                                                                                                                                                                              | GENE                            | 2020 | 744 |    | 0 | 0 |
| The role of the histone H3 variant CENPA in prostate cancer                                                               | Saha, Anjan K.; Contreras-Galindo, Rafael; Niknafs, Yashar S.; Iyer, Matthew; Qin, Tingting; Padmanabhan, Karthik; Siddiqui, Javed; Palande, Monica; Wang, Claire; Qian, Brian; Ward, Elizabeth; Tang, Tara; Tomlins, Scott A.; Gitlin, Scott D.; Sartor, Maureen A.; Omenn, Gilbert S.; Chinnaiyan, Arul M.; Markovitz, David M. | JOURNAL OF BIOLOGICAL CHEMISTRY | 2020 | 295 | 25 | 0 | 0 |
| Therapy-induced lipid uptake and remodeling underpin ferroptosis hypersensitivity in prostate cancer                      | Tousignant, Kaylyn D.; Rockstroh, Anja; Poad, Berwyck L. J.; Talebi, Ali; Young, Reuben S. E.; Fard, Atefeh Taherian; Gupta, Rajesh; Zang, Tuo; Wang, Chenwei; Lehman, Melanie L.; Swinnen, Johan, V; Blanksby, Stephen J.; Nelson, Colleen C.; Sadowski, Martin C.                                                               | CANCER & METABOLISM             | 2020 | 8   | 1  | 0 | 0 |
| Immune landscape of human prostate cancer: immune evasion mechanisms and biomarkers for personalized immunotherapy        | Bou-Dargham, Mayassa J.; Sha, Linlin; Sang, Qing-Xiang Amy; Zhang, Jinfeng                                                                                                                                                                                                                                                        | BMC CANCER                      | 2020 | 20  | 1  | 0 | 0 |
| AR and ERG drive the expression of prostate cancer specific long noncoding RNAs                                           | Kohvakka, Annika; Sattari, Mina; Shcherban, Anastasia; Annala, Matti; Urbanucci, Alfonso; Kesseli, Juha; Tammela, Teuvo L. J.; Kivinummi, Kati; Latonen, Leena; Nykter, Matti; Visakorpi, Tapio                                                                                                                                   | ONCOGENE                        | 2020 | 39  | 30 | 0 | 0 |
| G9a regulates tumorigenicity and stemness through genome-wide DNA methylation reprogramming in non-small cell lung cancer | Pangeni, Rajendra P.; Yang, Lu; Zhang, Keqiang; Wang, Jinhui; Li, Wendong; Guo, Chao; Yun, Xinwei; Sun, Ting; Wang, Jami; Raz, Dan J.                                                                                                                                                                                             | CLINICAL EPIGENETICS            | 2020 | 12  | 1  | 0 | 0 |

|                                                                                                                                                                                                              |                                                                                                                                                                                                                                   |                                          |      |    |    |   |   |
|--------------------------------------------------------------------------------------------------------------------------------------------------------------------------------------------------------------|-----------------------------------------------------------------------------------------------------------------------------------------------------------------------------------------------------------------------------------|------------------------------------------|------|----|----|---|---|
| Plasma metabolomic profile in prostatic intraepithelial neoplasia and prostate cancer and associations with the prostate-specific antigen and the Gleason score                                              | Markin, Pavel A.; Brito, Alex; Moskaleva, Natalia; Lartsova, Ekaterina, V; Shpot, Yevgeny, V; Lerner, Yulia, V; Mikhajlov, Vasily Y.; Potoldykova, Natalia, V; Enikeev, Dimitry, V; La Frano, Michael R.; Appolonova, Svetlana A. | METABOLOMICS                             | 2020 | 16 | 7  | 0 | 0 |
| Coexpression Analysis of the EZH2 Gene Using The Cancer Genome Atlas and Oncomine Databases Identifies Coexpressed Genes Involved in Biological Networks in Breast Cancer, Glioblastoma, and Prostate Cancer | Zhu, Jin; Jin, Lu; Zhang, Aili; Gao, Peng; Dai, Guangcheng; Xu, Ming; Xu, Lijun; Yang, Dongrong                                                                                                                                   | MEDICAL SCIENCE MONITOR                  | 2020 | 26 |    | 0 | 0 |
| Association of KLK3, VAMP8 and MDM4 Genetic Variants within microRNA Binding Sites with Prostate Cancer: Evidence from Serbian Population                                                                    | Kotarac, Nevena; Dobrijevic, Zorana; Matijasevic, Suzana; Savic-Pavicevic, Dusanka; Brajskovic, Goran                                                                                                                             | PATHOLOGY & ONCOLOGY RESEARCH            | 2020 |    |    | 0 | 0 |
| Sub-zeptomole Detection of Biomarker Proteins Using a Microfluidic Immunoarray with Nanostructured Sensors                                                                                                   | Dhanapala, Lasangi; Jones, Abby L.; Czarnecki, Patricia; Rusling, James F.                                                                                                                                                        | ANALYTICAL CHEMISTRY                     | 2020 | 92 | 12 | 0 | 0 |
| Downregulation of Collagen COL4A6 Is Associated with Prostate Cancer Progression and Metastasis                                                                                                              | Ma, Jian-Bin; Bai, Ji-Yu; Zhang, Hai-Bao; Gu, Lijiang; He, Dalin; Guo, Peng                                                                                                                                                       | GENETIC TESTING AND MOLECULAR BIOMARKERS | 2020 | 24 | 7  | 0 | 0 |
| Prediction of MiR-21-5p in Promoting the Development of Lung Adenocarcinoma via PDZD2 Regulation                                                                                                             | Cui, Shengjin; Lou, Shuang; Guo, Wei-quan; Jian, Shihui; Wu, Yunfeng; Liu, Xintong; Lan, Xi; Jia, Xingwang                                                                                                                        | MEDICAL SCIENCE MONITOR                  | 2020 | 26 |    | 0 | 0 |

|                                                                                                                                                                                         |                                                                                                                                                                                                                                                                                                                            |                                                                                 |      |     |    |   |   |
|-----------------------------------------------------------------------------------------------------------------------------------------------------------------------------------------|----------------------------------------------------------------------------------------------------------------------------------------------------------------------------------------------------------------------------------------------------------------------------------------------------------------------------|---------------------------------------------------------------------------------|------|-----|----|---|---|
| Enzyme-mediated depletion of serum L-Met abrogates prostate cancer growth via multiple mechanisms without evidence of systemic toxicity                                                 | Lu, Wei-Cheng; Saha, Achinto; Yan, Wupeng; Garrison, Kendra; Lamb, Candice; Pandey, Renu; Irani, Seema; Lodi, Alessia; Lu, Xiyuan; Tiziani, Stefano; Zhang, Yan Jessie; Georgiou, George; DiGiovanni, John; Stone, Everett                                                                                                 | PROCEEDINGS OF THE NATIONAL ACADEMY OF SCIENCES OF THE UNITED STATES OF AMERICA | 2020 | 117 | 23 | 0 | 0 |
| Systemic modulation of stress and immune parameters in patients treated for prostate adenocarcinoma by intensity-modulated radiation therapy or stereotactic ablative body radiotherapy | Frey, B.; Mika, J.; Jelonek, K.; Cruz-Garcia, L.; Roelants, C.; Testard, I; Cherradi, N.; Lumniczky, K.; Polozov, S.; Napieralska, A.; Widlak, P.; Gaip, U. S.; Badie, C.; Polanska, J.; Candelas, S. M.                                                                                                                   | STRAHLENTHERAPIE UND ONKOLOGIE                                                  | 2020 |     |    | 0 | 0 |
| Incarnatapeptins A and B, Nonribosomal Peptides Discovered Using Genome Mining and H-1/N-15 HSQC-TOCSY                                                                                  | Morgan, Kalindi D.; Williams, David E.; Patrick, Brian O.; Remigy, Marion; Banuelos, Carmen A.; Sadar, Marianne D.; Ryan, Katherine S.; Andersen, Raymond J.                                                                                                                                                               | ORGANIC LETTERS                                                                 | 2020 | 22  | 11 | 0 | 0 |
| H-1 NMR-Based Urine Metabolomics Reveals Signs of Enhanced Carbon and Nitrogen Recycling in Prostate Cancer                                                                             | Bruzzzone, Chiara; Loizaga-Iriarte, Ana; Sanchez-Mosquera, Pilar; Gil-Redondo, Ruben; Astobiza, Ianire; Diercks, Tammo; Cortazar, Ana R.; Ugalde-Olano, Aitziber; Schaefer, Hartmut; Blanco, Francisco J.; Unda, Miguel; Cannet, Claire; Spraul, Manfred; Mato, Jose M.; Embade, Nieves; Carracedo, Arkaitz; Millet, Oscar | JOURNAL OF PROTEOME RESEARCH                                                    | 2020 | 19  | 6  | 0 | 0 |
| Darolutamide antagonizes androgen signaling by blocking enhancer and super-enhancer activation                                                                                          | Baumgart, Simon J.; Nevedomskaya, Ekaterina; Lesche, Ralf; Newman, Richard; Mumberg, Dominik; Haendler, Bernard                                                                                                                                                                                                            | MOLECULAR ONCOLOGY                                                              | 2020 |     |    | 0 | 0 |
| New findings on urinary prostate cancer metabolome through combined GC-MS and(1)H NMR analytical platforms                                                                              | Lima, Ana Rita; Pinto, Joana; Barros-Silva, Daniela; Jeronimo, Carmen; Henrique, Rui; Bastos, Maria de Lourdes; Carvalho, Marcia; Pinho, Paula Guedes                                                                                                                                                                      | METABOLOMICS                                                                    | 2020 | 16  | 6  | 0 | 0 |



|                                                                                                                       |                                                                                                                                                                                                                                                                                                                                                                                                        |         |      |    |   |   |   |
|-----------------------------------------------------------------------------------------------------------------------|--------------------------------------------------------------------------------------------------------------------------------------------------------------------------------------------------------------------------------------------------------------------------------------------------------------------------------------------------------------------------------------------------------|---------|------|----|---|---|---|
| MARCH5 mediates NOXA-dependent MCL1 degradation driven by kinase inhibitors and integrated stress response activation | Arai, Seiji; Varkaris, Andreas; Nouri, Mannan; Chen, Sen; Xie, Lisha; Balk, Steven P.                                                                                                                                                                                                                                                                                                                  | ELIFE   | 2020 | 9  |   | 0 | 0 |
| Conditionally Reprogrammed Cells from Patient-Derived Xenograft to Model Neuroendocrine Prostate Cancer Development   | Ci, Xinpei; Hao, Jun; Dong, Xin; Xue, Hui; Wu, Rebecca; Choi, Stephen Yiu Chuen; Haegert, Anne M.; Collins, Colin C.; Liu, Xuefeng; Lin, Dong; Wang, Yuzhuo                                                                                                                                                                                                                                            | CELLS   | 2020 | 9  | 6 | 0 | 0 |
| Clinical Applications of Molecular Biomarkers in Prostate Cancer                                                      | Counago, Felipe; Lopez-Campos, Fernando; Diaz-Gavela, Ana Aurora; Almagro, Elena; Fenandez-Pascual, Esau; Henriquez, Ivan; Lozano, Rebeca; Espinos, Estefania Linares; Gomez-Iturriaga, Alfonso; de Velasco, Guillermo; Franco, Luis Miguel Quintana; Rodriguez-Melcon, Ignacio; Lopez-Torrecilla, Jose; Spratt, Daniel E.; Guerrero, Luis Leonardo; Martinez-Salamanca, Juan Ignacio; del Cerro, Elia | CANCERS | 2020 | 12 | 6 | 0 | 0 |
| Liquid Biopsy in Colorectal Carcinoma: Clinical Applications and Challenges                                           | Kolencik, Drahomir; Shishido, Stephanie N.; Pitule, Pavel; Mason, Jeremy; Hicks, James; Kuhn, Peter                                                                                                                                                                                                                                                                                                    | CANCERS | 2020 | 12 | 6 | 0 | 0 |
| Low Molecular Weight Fucoidan Prevents Radiation-Induced Fibrosis and Secondary Tumors in a Zebrafish Model           | Wu, Szu-Yuan; Yang, Wan-Yu; Cheng, Chun-Chia; Hsiao, Ming-Chen; Tsai, Shin-Lin; Lin, Hua-Kuo; Lin, Kuan-Hao; Yuh, Chiou-Hwa                                                                                                                                                                                                                                                                            | CANCERS | 2020 | 12 | 6 | 0 | 0 |
| New Frontiers in Prostate Cancer Treatment: Are We Ready for Drug Combinations with Novel Agents?                     | Aurilio, Gaetano; Cimadamore, Alessia; Santoni, Matteo; Nole, Franco; Scarpelli, Marina; Massari, Francesco; Lopez-Beltran, Antonio; Cheng, Liang; Montironi, Rodolfo                                                                                                                                                                                                                                  | CELLS   | 2020 | 9  | 6 | 0 | 0 |
| DNA Methylation Changes in Human Papillomavirus-Driven Head and Neck Cancers                                          | Weeramange, Chameera Ekanayake; Tang, Kai Dun; Vasani, Sarju; Langton-Lockton, Julian; Kenny, Liz; Punyadeera, Chamindie                                                                                                                                                                                                                                                                               | CELLS   | 2020 | 9  | 6 | 0 | 0 |

|                                                                                                                                                                        |                                                                                                                                                                                                                                             |                                         |      |     |    |   |   |
|------------------------------------------------------------------------------------------------------------------------------------------------------------------------|---------------------------------------------------------------------------------------------------------------------------------------------------------------------------------------------------------------------------------------------|-----------------------------------------|------|-----|----|---|---|
| Prostate cancer biology & genomics                                                                                                                                     | Whitaker, Hayley; Tam, Joseph O.; Connor, Martin J.; Grey, Alistair                                                                                                                                                                         | TRANSLATIONAL ANDROLOGY AND UROLOGY     | 2020 | 9   | 3  | 0 | 0 |
| Triple Selection Strategy for In Situ Labeling of Circulating Tumor Cells with High Purity and Viability toward Preclinical Personalized Drug Sensitivity Analysis     | Mu, Hsuan-Yo; Ou, Yen-Chuan; Chuang, Han-Ni; Lu, Tsai-Jung; Jhan, Pei-Pei; Hsiao, Tzu-Hung; Huang, Jen-Huang                                                                                                                                | ADVANCED BIOSYSTEMS                     | 2020 | 4   | 6  | 0 | 0 |
| Identification of Potential Key Genes for Pathogenesis and Prognosis in Prostate Cancer by Integrated Analysis of Gene Expression Profiles and the Cancer Genome Atlas | Liu, Shuang; Wang, Wenxin; Zhao, Yan; Liang, Kaige; Huang, Yaojiang                                                                                                                                                                         | FRONTIERS IN ONCOLOGY                   | 2020 | 10  |    | 0 | 0 |
| Detection of Molecular Signatures of Homologous Recombination Deficiency in Prostate Cancer with or without BRCA1/2 Mutations                                          | Sztupinszki, Zsafia; Diossy, Miklos; Krzystanek, Marcin; Borcsok, Judit; Pomerantz, Mark M.; Tisza, Viktoria; Spisak, Sandor; Ruzs, Orsolya; Csabai, Istvan; Freedman, Matthew L.; Szallasi, Zoltan                                         | CLINICAL CANCER RESEARCH                | 2020 | 26  | 11 | 0 | 0 |
| An Emerging Landscape for Canonical and Actionable Molecular Alterations in Primary and Metastatic Prostate Cancer                                                     | Dawson, Nancy A.; Zibelman, Matthew; Lindsay, Timothy; Feldman, Rebecca A.; Saul, Michelle; Gatalica, Zoran; Korn, W. Michael; Heath, Elisabeth, I                                                                                          | MOLECULAR CANCER THERAPEUTICS           | 2020 | 19  | 6  | 0 | 0 |
| Extracellular vesicles as biomarkers in malignant pleural mesothelioma: A review                                                                                       | Ahmadzada, Tamkin; Kao, Steven; Reid, Glen; Clarke, Stephen; Grau, Georges E.; Hosseini-Beheshti, Elham                                                                                                                                     | CRITICAL REVIEWS IN ONCOLOGY HEMATOLOGY | 2020 | 150 |    | 0 | 0 |
| AR-dependent phosphorylation and phospho-proteome targets in prostate cancer                                                                                           | Venkadakrishnan, Varadha Balaji; Ben-Salem, Salma; Heemers, Hannelore, V                                                                                                                                                                    | ENDOCRINE-RELATED CANCER                | 2020 | 27  | 6  | 0 | 0 |
| Germline polymorphisms associated with impaired survival outcomes and somatic tumor alterations in advanced prostate cancer                                            | Chen, William S.; Feng, Eric L.; Aggarwal, Rahul; Foye, Adam; Beer, Tomasz M.; Alumkal, Joshi J.; Gleave, Martin; Chi, Kim N.; Reiter, Robert E.; Rettig, Matthew B.; Evans, Christopher P.; Small, Eric J.; Sharifi, Nima; Zhao, Shuang G. | PROSTATE CANCER AND PROSTATIC DISEASES  | 2020 | 23  | 2  | 0 | 0 |

|                                                                                                                                                |                                                                                                                                                                                                                                                                                                                                      |                                      |      |     |   |   |   |
|------------------------------------------------------------------------------------------------------------------------------------------------|--------------------------------------------------------------------------------------------------------------------------------------------------------------------------------------------------------------------------------------------------------------------------------------------------------------------------------------|--------------------------------------|------|-----|---|---|---|
| Genomics models in radiotherapy: From mechanistic to machine learning                                                                          | Kang, John; Coates, James T.; Strawderman, Robert L.; Rosenstein, Barry S.; Kerns, Sarah L.                                                                                                                                                                                                                                          | MEDICAL PHYSICS                      | 2020 | 47  | 5 | 0 | 0 |
| PCAT1: An oncogenic lncRNA in diverse cancers and a putative therapeutic target                                                                | Ghafouri-Fard, Soudeh; Dashti, Sepideh; Taheri, Mohammad                                                                                                                                                                                                                                                                             | EXPERIMENTAL AND MOLECULAR PATHOLOGY | 2020 | 114 |   | 0 | 0 |
| Challenges, applications and future directions of precision medicine in prostate cancer - the role of organoids and patient-derived xenografts | Joshi, Andre; Roberts, Matthew J.; Alinezhad, Saeid; Williams, Elizabeth D.; Vela, Ian                                                                                                                                                                                                                                               | BJU INTERNATIONAL                    | 2020 | 126 | 1 | 0 | 0 |
| Reverse transcriptase inhibitors promote the remodelling of nuclear architecture and induce autophagy in prostate cancer cells                 | Bellisai, Cristina; Sciamanna, Ilaria; Rovella, Paola; Giovannini, Daniela; Baranzini, Mirko; Pugliese, Giusj Monia; Ansari, Mohammad Salik Zeya; Milite, Ciro; Sinibaldi-Vallebona, Paola; Cirilli, Roberto; Sbardella, Gianluca; Pichierri, Pietro; Trisciuglio, Daniela; Lavia, Patrizia; Serafino, Annalucia; Spadafora, Corrado | CANCER LETTERS                       | 2020 | 478 |   | 0 | 0 |
| Detecting Prognosis Risk Biomarkers for Colon Cancer Through Multi-Omics-Based Prognostic Analysis and Target Regulation Simulation Modeling   | Yin, Zuoqing; Yan, Xinmiao; Wang, Qiming; Deng, Zeliang; Tang, Kailin; Cao, Zhiwei; Qiu, Tianyi                                                                                                                                                                                                                                      | FRONTIERS IN GENETICS                | 2020 | 11  |   | 0 | 0 |
| Combined TP53 and RB1 Loss Promotes Prostate Cancer Resistance to a Spectrum of Therapeutics and Confers Vulnerability to Replication Stress   | Nyquist, Michael D.; Corella, Alexandra; Coleman, Ilsa; De Sarkar, Navonil; Kaipainen, Arja; Ha, Gavin; Gulati, Roman; Ang, Lisa; Chatterjee, Payel; Lucas, Jared; Pritchard, Colin; Risbridger, Gail; Isaacs, John; Montgomery, Bruce; Morrissey, Colm; Corey, Eva; Nelson, Peter S.                                                | CELL REPORTS                         | 2020 | 31  | 8 | 0 | 0 |

|                                                                                                                                                        |                                                                                                                                                                                                                                                                                                                                                                                                                                        |                                |      |     |   |   |   |
|--------------------------------------------------------------------------------------------------------------------------------------------------------|----------------------------------------------------------------------------------------------------------------------------------------------------------------------------------------------------------------------------------------------------------------------------------------------------------------------------------------------------------------------------------------------------------------------------------------|--------------------------------|------|-----|---|---|---|
| Independence of HIF1a and androgen signaling pathways in prostate cancer                                                                               | Tran, Maxine G. B.; Bibby, Becky A. S.; Yang, Lingjian; Lo, Franklin; Warren, Anne Y.; Shukla, Deepa; Osborne, Michelle; Hadfield, James; Carroll, Thomas; Stark, Rory; Scott, Helen; Ramos-Montoya, Antonio; Massie, Charlie; Maxwell, Patrick; West, Catharine M. L.; Mills, Ian G.; Neal, David E.                                                                                                                                  | BMC CANCER                     | 2020 | 20  | 1 | 0 | 0 |
| The genetic landscapes of urological cancers and their clinical implications in the era of high-throughput genome analysis                             | Light, Alexander; Ahmed, Aamir; Dasgupta, Prokar; Elhage, Oussama                                                                                                                                                                                                                                                                                                                                                                      | BJU INTERNATIONAL              | 2020 | 126 | 1 | 0 | 0 |
| CDCA2 Inhibits Apoptosis and Promotes Cell Proliferation in Prostate Cancer and Is Directly Regulated by HIF-1 alpha Pathway                           | Zhang, Yixiang; Cheng, Yingduan; Zhang, Zhaoxia; Bai, Zhongyuan; Jin, Hongtao; Guo, Xiaojing; Huang, Xiaoyan; Li, Meiqi; Wang, Maolin; Shu, Xing-sheng; Yuan, Yeqing; Ying, Ying                                                                                                                                                                                                                                                       | FRONTIERS IN ONCOLOGY          | 2020 | 10  |   | 0 | 0 |
| 2,4-dienoyl-CoA reductase regulates lipid homeostasis in treatment-resistant prostate cancer                                                           | Blomme, Arnaud; Ford, Catriona A.; Mui, Ernest; Patel, Rachana; Ntala, Chara; Jamieson, Lauren E.; Planque, Melanie; McGregor, Grace H.; Peixoto, Paul; Hervouet, Eric; Nixon, Colin; Salji, Mark; Gaughan, Luke; Markert, Elke; Repiscak, Peter; Sumpton, David; Blanco, Giovanni Rodriguez; Lilla, Sergio; Kamphorst, Jurre J.; Graham, Duncan; Faulds, Karen; MacKay, Gillian M.; Fendt, Sarah-Maria; Zanivan, Sara; Leung, Hing Y. | NATURE COMMUNICATIONS          | 2020 | 11  | 1 | 0 | 0 |
| Long non-coding RNA FAM66C is associated with clinical progression and promotes cell proliferation by inhibiting proteasome pathway in prostate cancer | Xie, Yimin; Gu, Jie; Qin, Zhenqian; Ren, Zhen; Wang, Yanwei; Shi, Haifeng; Chen, Binghai                                                                                                                                                                                                                                                                                                                                               | CELL BIOCHEMISTRY AND FUNCTION | 2020 |     |   | 0 | 0 |

|                                                                                                                                  |                                                                                                                                                                                                                                                                                                |                               |      |      |   |   |   |
|----------------------------------------------------------------------------------------------------------------------------------|------------------------------------------------------------------------------------------------------------------------------------------------------------------------------------------------------------------------------------------------------------------------------------------------|-------------------------------|------|------|---|---|---|
| Comprehensive metabolomics analysis of prostate cancer tissue in relation to tumor aggressiveness and TMPRSS2-ERG fusion status  | Dudka, Ilona; Thysell, Elin; Lundquist, Kristina; Antti, Henrik; Iglesias-Gato, Diego; Flores-Morales, Amilcar; Bergh, Anders; Wikstrom, Pernilla; Grobner, Gerhard                                                                                                                            | BMC CANCER                    | 2020 | 20   | 1 | 0 | 0 |
| Identification and Validation of Prognostically Relevant Gene Signature in Melanoma                                              | Gao, Yali; Li, Yaling; Niu, Xueli; Wu, Yutong; Guan, Xiuhao; Hong, Yuxiao; Chen, Hongduo; Song, Bing                                                                                                                                                                                           | BIOMED RESEARCH INTERNATIONAL | 2020 | 2020 |   | 0 | 0 |
| Aggressive prostate cancer phenotype and genome-wide association studies: where are we now?                                      | Pinto, Ana R.; Silva, Jani; Pinto, Ricardo; Medeiros, Rui                                                                                                                                                                                                                                      | PHARMACOGENOMICS              | 2020 | 21   | 7 | 0 | 0 |
| Phospholipase C-like protein 2 (PLC-L2) is associated with cytolytic ability of CD8(+) T cells and prognosis of prostate cancer  | Li, Kaiwen; Ma, Xiaoming; Wang, Qiong; Zhou, Qianghua; Chen, Xu; Guo, Zhenghui; Lai, Yiming; Tao, Yiran; Wu, Wanhua; Peng, Shirong; Cai, Wenli; Bai, Shoumin; Huang, Hai                                                                                                                       | MATERIALS EXPRESS             | 2020 | 10   | 5 | 0 | 0 |
| SLFN11 Expression in Advanced Prostate Cancer and Response to Platinum-based Chemotherapy                                        | Conteduca, Vincenza; Ku, Sheng-Yu; Puca, Loredana; Slade, Megan; Fernandez, Luisa; Hess, Judy; Bareja, Rohan; Vlachostergios, Panagiotis J.; Sigouros, Michael; Mosquera, Juan Miguel; Sboner, Andrea; Nanus, David M.; Elemento, Olivier; Dittamore, Ryan; Tagawa, Scott T.; Beltran, Himisha | MOLECULAR CANCER THERAPEUTICS | 2020 | 19   | 5 | 0 | 0 |
| Prognostic value of mitotic checkpoint protein BUB3, cyclin B1, and pituitary tumor-transforming 1 expression in prostate cancer | Ersvaer, Elin; Kildal, Wanja; Vlatkovic, Ljiljana; Cyll, Karolina; Pradhan, Manohar; Kleppe, Andreas; Hveem, Tarjei S.; Askautrud, Hanne A.; Novelli, Marco; Waehre, Hakon; Liestol, Knut; Danielsen, Havard E.                                                                                | MODERN PATHOLOGY              | 2020 | 33   | 5 | 0 | 0 |
| PLC epsilon knockdown enhances the radiosensitivity of castration-resistant prostate cancer via the AR/PARP1/DNA-PKcs axis       | Pu, Jun; Li, Ting; Liu, Nanjing; Luo, Chunli; Quan, Zhen; Li, Luo; Wu, Xiaohou                                                                                                                                                                                                                 | ONCOLOGY REPORTS              | 2020 | 43   | 5 | 0 | 0 |
| Proteomic and transcriptomic profiling of Pten gene-knockout mouse model of prostate cancer                                      | Zhang, Jinhui; Kim, Sangyub; Li, Li; Kemp, Christopher J.; Jiang, Cheng; Lu, Junxuan                                                                                                                                                                                                           | PROSTATE                      | 2020 | 80   | 7 | 0 | 0 |

|                                                                                                                                     |                                                                                                                                                                                                                                                                                                                                                               |                                      |      |     |    |   |   |
|-------------------------------------------------------------------------------------------------------------------------------------|---------------------------------------------------------------------------------------------------------------------------------------------------------------------------------------------------------------------------------------------------------------------------------------------------------------------------------------------------------------|--------------------------------------|------|-----|----|---|---|
| A comprehensive review of the role of long non-coding RNAs in organs with an endocrine function                                     | Ghafouri-Fard, Soudeh; Esmaeili, Mohammadhosein; Shoorei, Hamed; Taheri, Mohammad                                                                                                                                                                                                                                                                             | BIOMEDICINE & PHARMACOTHERAPY        | 2020 | 125 |    | 0 | 0 |
| Epigenetic regulation in human cancer: the potential role of epigenetic drug in cancer therapy                                      | Lu, Yuanjun; Chan, Yau-Tuen; Tan, Hor-Yue; Li, Sha; Wang, Ning; Feng, Yibin                                                                                                                                                                                                                                                                                   | MOLECULAR CANCER                     | 2020 | 19  | 1  | 0 | 0 |
| Circulating tumor cells as Trojan Horse for understanding, preventing, and treating cancer: a critical appraisal                    | Mentis, Alexios-Fotios A.; Grivas, Petros D.; Dardiotis, Efthimios; Romas, Nicholas A.; Papavassiliou, Athanasios G.                                                                                                                                                                                                                                          | CELLULAR AND MOLECULAR LIFE SCIENCES | 2020 |     |    | 0 | 0 |
| Emerging role of PTEN loss in evasion of the immune response to tumours                                                             | Vidotto, Thiago; Melo, Camila Morais; Castelli, Erick; Koti, Madhuri; dos Reis, Rodolfo Borges; Squire, Jeremy A.                                                                                                                                                                                                                                             | BRITISH JOURNAL OF CANCER            | 2020 |     |    | 0 | 0 |
| ARNT-dependent CCR8 reprogrammed LDH isoform expression correlates with poor clinical outcomes of prostate cancer                   | Chen, Guo; Cai, Zhi-duan; Lin, Zhuo-yuan; Wang, Cong; Liang, Yu-xiang; Han, Zhao-dong; He, Hui-chan; Mo, Ru-jun; Lu, Jian-ming; Pan, Bin; Wu, Chin-lee; Wang, Fen; Zhong, Wei-de                                                                                                                                                                              | MOLECULAR CARCINOGENESIS             | 2020 | 59  | 8  | 0 | 0 |
| Intratumor delta-catenin heterogeneity driven by genomic rearrangement dictates growth factor dependent prostate cancer progression | Li, Mingchuan; Nopparat, Jongdee; Aguilar, Byron J.; Chen, Yan-hua; Zhang, Jiao; Du, Jie; Ai, Xin; Luo, Yong; Jiang, Yongguang; Boykin, Christi; Lu, Qun                                                                                                                                                                                                      | ONCOGENE                             | 2020 | 39  | 22 | 0 | 0 |
| Upregulation of PTTG1 is associated with poor prognosis in prostate cancer                                                          | Fraune, Christoph; Yehorov, Serhiy; Luebke, Andreas M.; Steurer, Stefan; Hübner, Claudia; Buescheck, Franziska; Hoeflmayer, Doris; Tsourlakis, Maria Christina; Clauditz, Till S.; Simon, Ronald; Sauter, Guido; Weidemann, Soeren; Dum, David; Kind, Simon; Minner, Sarah; Schlomm, Thorsten; Huland, Hartwig; Heinzer, Hans; Graefen, Markus; Burandt, Eike | PATHOLOGY INTERNATIONAL              | 2020 | 70  | 7  | 0 | 0 |

|                                                                                                                                                                       |                                                                                                                                                                                                                                                                                                                                                                                                                                                                                                                                                   |                                        |      |    |   |   |   |
|-----------------------------------------------------------------------------------------------------------------------------------------------------------------------|---------------------------------------------------------------------------------------------------------------------------------------------------------------------------------------------------------------------------------------------------------------------------------------------------------------------------------------------------------------------------------------------------------------------------------------------------------------------------------------------------------------------------------------------------|----------------------------------------|------|----|---|---|---|
| Functional and genomic characterization of three novel cell lines derived from a metastatic gallbladder cancer tumor                                                  | Garcia, Patricia; Bizama, Carolina; Rosa, Lorena; Espinoza, Jaime A.; Weber, Helga; Cerda-Infante, Javier; Sanchez, Marianela; Montecinos, Viviana P.; Lorenzo-Bermejo, Justo; Boekstegers, Felix; Davila-Lopez, Marcela; Alfaro, Francisca; Leiva-Acevedo, Claudia; Parra, Zasha; Romero, Diego; Kato, Sumie; Leal, Pamela; Lagos, Marcela; Carlos Roa, Juan                                                                                                                                                                                     | BIOLOGICAL RESEARCH                    | 2020 | 53 | 1 | 0 | 0 |
| Clinical and genomic characterization of Low PSA Secretors: a unique subset of metastatic castration resistant prostate cancer                                        | Aggarwal, Rahul; Romero, Gustavo Rubio; Friedl, Verena; Weinstein, Alana; Foye, Adam; Huang Jiaoti; Feng, Felix; Stuart, Joshua M.; Small, Eric J.                                                                                                                                                                                                                                                                                                                                                                                                | PROSTATE CANCER AND PROSTATIC DISEASES | 2020 |    |   | 0 | 0 |
| Loss of CHD1 Promotes Heterogeneous Mechanisms of Resistance to AR-Targeted Therapy via Chromatin Dysregulation                                                       | Zhang, Zeda; Zhou, Chuanli; Li, Xiaoling; Barnes, Spencer D.; Deng, Su; Hoover, Elizabeth; Chen, Chi-Chao; Lee, Young Sun; Zhang, Yanxiao; Wang, Choushi; Metang, Lauren A.; Wu, Chao; Tirado, Carla Rodriguez; Johnson, Nickolas A.; Wongvipat, John; Navrazhina, Kristina; Cao, Zhen; Choi, Danielle; Huang, Chun-Hao; Linton, Eliot; Chen, Xiaoping; Liang, Yupu; Mason, Christopher E.; de Stanchina, Elisa; Abida, Wassim; Lujambio, Amaia; Li, Sheng; Lowe, Scott W.; Mendell, Joshua T.; Malladi, Venkat S.; Sawyers, Charles L.; Mu, Ping | CANCER CELL                            | 2020 | 37 | 4 | 0 | 0 |
| Quantitative SWATH-Based Proteomic Profiling for Identification of Mechanism-Driven Diagnostic Biomarkers Conferring in the Progression of Metastatic Prostate Cancer | Singh, Anshika N.; Sharma, Neeti                                                                                                                                                                                                                                                                                                                                                                                                                                                                                                                  | FRONTIERS IN ONCOLOGY                  | 2020 | 10 |   | 0 | 0 |

|                                                                                                                                                                                                          |                                                                                                                                                                                                                                                |                                                                                 |      |     |    |   |   |
|----------------------------------------------------------------------------------------------------------------------------------------------------------------------------------------------------------|------------------------------------------------------------------------------------------------------------------------------------------------------------------------------------------------------------------------------------------------|---------------------------------------------------------------------------------|------|-----|----|---|---|
| Broad and thematic remodeling of the surfaceome and glycoproteome on isogenic cells transformed with driving proliferative oncogenes                                                                     | Leung, Kevin K.; Wilson, Gary M.; Kirkemo, Lisa L.; Riley, Nicholas M.; Coon, Joshua J.; Wells, James A.                                                                                                                                       | PROCEEDINGS OF THE NATIONAL ACADEMY OF SCIENCES OF THE UNITED STATES OF AMERICA | 2020 | 117 | 14 | 0 | 0 |
| Circulating cell-free DNA: Translating prostate cancer genomics into clinical care                                                                                                                       | Tandefelt, Delila Gasi; de Bono, Johann                                                                                                                                                                                                        | MOLECULAR ASPECTS OF MEDICINE                                                   | 2020 | 72  |    | 0 | 0 |
| EGCG Mediated Targeting of Deregulated Signaling Pathways and Non-Coding RNAs in Different Cancers: Focus on JAK/STAT, Wnt/beta-Catenin, TGF/SMAD, NOTCH, SHH/GLI, and TRAIL Mediated Signaling Pathways | Farooqi, Ammad Ahmad; Pinheiro, Marina; Granja, Andreia; Farabegoli, Fulvia; Reis, Salette; Attar, Rukset; Sabitaliyevich, Uteuliyev Yerzhan; Xu, Baojun; Ahmad, Aamir                                                                         | CANCERS                                                                         | 2020 | 12  | 4  | 0 | 0 |
| The oncogenic roles of bacterial infections in development of cancer                                                                                                                                     | Eyvazi, Shirin; Vostakolaei, Mehdi Asghari; Dilmaghani, Azita; Borumandi, Omid; Hejazi, Mohammad Saeid; Kahroba, Houman; Tarhriz, Vahideh                                                                                                      | MICROBIAL PATHOGENESIS                                                          | 2020 | 141 |    | 0 | 0 |
| Identification of potential crucial genes associated with the pathogenesis and prognosis of prostate cancer                                                                                              | Mu, Hai-Qi; Liang, Zhi-Qiang; Xie, Qi-Peng; Han, Wei; Yang, Sen; Wang, Shuai-Bin; Zhao, Cheng; Cao, Ye-Min; He, You-Hua; Chen, Jian                                                                                                            | BIOMARKERS IN MEDICINE                                                          | 2020 | 14  | 5  | 0 | 0 |
| Exome sequencing identified six copy number variations as a prediction model for recurrence of primary prostate cancers with distinctive prognosis                                                       | Liu, Jie; Yan, Jiajun; Mao, Ruifang; Ren, Guoping; Liu, Xiaoyan; Zhang, Yanling; Wang, Jili; Wang, Yan; Li, Meiling; Qiu, Qingchong; Wang, Lin; Liu, Guanfeng; Jin, Shanshan; Ma, Liang; Ma, Yingying; Zhao, Na; Zhang, Hongwei; Lin, Biaoyang | TRANSLATIONAL CANCER RESEARCH                                                   | 2020 | 9   | 4  | 0 | 0 |



|                                                                                                                                                                                                                                            |                                                                                                                                                                                                                                                                                                                                                                                                                                                                                                                                                                                                             |                                            |      |     |   |   |   |
|--------------------------------------------------------------------------------------------------------------------------------------------------------------------------------------------------------------------------------------------|-------------------------------------------------------------------------------------------------------------------------------------------------------------------------------------------------------------------------------------------------------------------------------------------------------------------------------------------------------------------------------------------------------------------------------------------------------------------------------------------------------------------------------------------------------------------------------------------------------------|--------------------------------------------|------|-----|---|---|---|
| STAT3-dependent analysis reveals PDK4 as independent predictor of recurrence in prostate cancer                                                                                                                                            | Oberhuber, Monika; Pecoraro, Matteo; Rusz, Mate; Oberhuber, Georg; Wieselberg, Maritta; Haslinger, Peter; Gurnhofer, Elisabeth; Schleder, Michaela; Limberger, Tanja; Lagner, Sabine; Pencik, Jan; Kodajova, Petra; Hoegler, Sandra; Stockmaier, Georg; Grund-Groeschke, Sandra; Aberger, Fritz; Bolis, Marco; Theurillat, Jean-Philippe; Wiebringhaus, Robert; Weiss, Theresa; Haitel, Andrea; Brehme, Marc; Wadsak, Wolfgang; Griss, Johannes; Mohr, Thomas; Hofer, Alexandra; Jaeger, Anton; Pollheimer, Juergen; Egger, Gerda; Koellensperger, Gunda; Mann, Matthias; Hantusch, Brigitte; Kenner, Lukas | MOLECULAR SYSTEMS BIOLOGY                  | 2020 | 16  | 4 | 0 | 0 |
| MULTI-PARAMETRIC MAGNETIC RESONANCE IMAGING OF MULTI-FOCAL PROSTATE CANCER UNMASKS INTRA-PROSTATIC GENOMIC HETEROGENEITY AND NOVEL RADIO-GENOMIC CORRELATES: RESULTS OF THE SMARTER PROSTATE INTERVENTIONS AND THERAPEUTICS (SPIRIT) STUDY | Chin, Joseph; Correa, Rohann; Aref-Eshghi, Erfan; Alfano, Ryan; Sadikovic, Bekim; Ward, Aaron; Boutros, Paul; Bartlett, John; Kassam, Zahra; Pautler, Stephen; Gaed, Mena; GomezLemus, Jose; Moussa, Madeleine; Bauman, Glenn                                                                                                                                                                                                                                                                                                                                                                               | JOURNAL OF UROLOGY                         | 2020 | 203 |   | 0 | 0 |
| Development and validation of hub genes for lymph node metastasis in patients with prostate cancer                                                                                                                                         | Xu, Ning; Chen, Shao-Hao; Lin, Ting-Ting; Cai, Hai; Ke, Zhi-Bin; Dong, Ru-Nan; Huang, Peng; Li, Xiao-Dong; Chen, Ye-Hui; Zheng, Qing-Shui                                                                                                                                                                                                                                                                                                                                                                                                                                                                   | JOURNAL OF CELLULAR AND MOLECULAR MEDICINE | 2020 | 24  | 8 | 0 | 0 |

|                                                                                                                                                                             |                                                                                                                                                                                                                                                                                                                                               |                                                        |      |    |   |   |   |
|-----------------------------------------------------------------------------------------------------------------------------------------------------------------------------|-----------------------------------------------------------------------------------------------------------------------------------------------------------------------------------------------------------------------------------------------------------------------------------------------------------------------------------------------|--------------------------------------------------------|------|----|---|---|---|
| Diverse AR Gene Rearrangements Mediate Resistance to Androgen Receptor Inhibitors in Metastatic Prostate Cancer                                                             | Li, Yingming; Yang, Rendong; Henzler, Christine M.; Ho, Yeung; Passow, Courtney; Auch, Benjamin; Carreira, Suzanne; Rodrigues, Daniel Nava; Bertan, Claudia; Tae Hyun Hwang; Quigley, David A.; Dang, Ha X.; Morrissey, Colm; Fraser, Michael; Plymate, Stephen R.; Maher, Christopher A.; Feng, Felix Y.; de Bono, Johann S.; Dehm, Scott M. | CLINICAL CANCER RESEARCH                               | 2020 | 26 | 8 | 0 | 0 |
| TP53 Gain-of-Function Mutations in Circulating Tumor DNA in Men With Metastatic Castration-Resistant Prostate Cancer                                                        | Chapman, Lynne; Ledet, Elisa M.; Barata, Pedro C.; Cotogno, Patrick; Manogue, Charlotte; Moses, Marcus; Christensen, Bryce R.; Steinwald, Peter; Ranasinghe, Lahiru; Layton, Jodi L.; Lewis, Brian E.; Sartor, Oliver                                                                                                                         | CLINICAL GENITOURINARY CANCER                          | 2020 | 18 | 2 | 0 | 0 |
| A piece in prostate cancer puzzle: Future perspective of novel molecular signatures                                                                                         | Nassir, Anmar M.                                                                                                                                                                                                                                                                                                                              | SAUDI JOURNAL OF BIOLOGICAL SCIENCES                   | 2020 | 27 | 4 | 0 | 0 |
| Nuclear magnetic resonance spectroscopy of human body fluids and in vivo magnetic resonance spectroscopy: Potential role in the diagnosis and management of prostate cancer | Gholizadeh, Neda; Pundavela, Jay; Nagarajan, Rajakumar; Dona, Anthony; Quadrelli, Scott; Biswas, Tapan; Greer, Peter B.; Ramadan, Saadallah                                                                                                                                                                                                   | UROLOGIC ONCOLOGY-SEMINARS AND ORIGINAL INVESTIGATIONS | 2020 | 38 | 4 | 0 | 0 |
| Current Perspectives on Circulating Tumor DNA, Precision Medicine, and Personalized Clinical Management of Cancer                                                           | Oliveira, Kelly C. S.; Ramos, Iago Barroso; Silva, Jessica M. C.; Barra, Williams Fernandes; Riggins, Gregory J.; Palande, Vikrant; Pinho, Catarina Torres; Frenkel-Morgenstern, Milana; Santos, Sidney E. B.; Assumpcao, Paulo P.; Burbano, Rommel R.; Calcagno, Danielle Queiroz                                                            | MOLECULAR CANCER RESEARCH                              | 2020 | 18 | 4 | 0 | 0 |
| Alternative Splicing in the Nuclear Receptor Superfamily Expands Gene Function to Refine Endo-Xenobiotic Metabolism                                                         | Annalora, Andrew J.; Marcus, Craig B.; Iversen, Patrick L.                                                                                                                                                                                                                                                                                    | DRUG METABOLISM AND DISPOSITION                        | 2020 | 48 | 4 | 0 | 0 |

|                                                                                                                                                                               |                                                                                                                                                                                                                                                                                                                                                                                                                                                                                                    |                                        |      |      |    |   |   |
|-------------------------------------------------------------------------------------------------------------------------------------------------------------------------------|----------------------------------------------------------------------------------------------------------------------------------------------------------------------------------------------------------------------------------------------------------------------------------------------------------------------------------------------------------------------------------------------------------------------------------------------------------------------------------------------------|----------------------------------------|------|------|----|---|---|
| Metabolomic effects of androgen deprivation therapy treatment for prostate cancer                                                                                             | Chi, Jen-Tsan; Lin, Pao-Hwa; Tolstikov, Vladimir; Oyekunle, Taofik; Chen, Emily Y.; Bussberg, Valerie; Greenwood, Bennett; Sarangarajan, Rangaprasad; Narain, Niven R.; Kiebish, Michael A.; Freedland, Stephen J.                                                                                                                                                                                                                                                                                 | CANCER MEDICINE                        | 2020 | 9    | 11 | 0 | 0 |
| The Prospect of Identifying Resistance Mechanisms for Castrate-Resistant Prostate Cancer Using Circulating Tumor Cells: Is Epithelial-to-Mesenchymal Transition a Key Player? | Khan, Tanzila; Scott, Kieran F.; Becker, Therese M.; Lock, John; Nimir, Mohammed; Ma, Yafeng; de Souza, Paul                                                                                                                                                                                                                                                                                                                                                                                       | PROSTATE CANCER                        | 2020 | 2020 |    | 0 | 0 |
| How should radiologists incorporate non-imaging prostate cancer biomarkers into daily practice?                                                                               | Rajwa, Pawel; Syed, Jamil; Leapman, Michael S.                                                                                                                                                                                                                                                                                                                                                                                                                                                     | ABDOMINAL RADIOLOGY                    | 2020 |      |    | 0 | 0 |
| Performance of clinicopathologic models in men with high risk localized prostate cancer: impact of a 22-gene genomic classifier                                               | Tosoian, Jeffrey J.; Birer, Samuel R.; Karnes, R. Jeffrey; Zhang, Jingbin; Davicioni, Elai; Klein, Eric E.; Freedland, Stephen J.; Weinmann, Sheila; Trock, Bruce J.; Dess, Robert T.; Zhao, Shuang G.; Jackson, William C.; Yamoah, Kosj; Dal Pral, Alan; Mahal, Brandon A.; Morgan, Todd M.; Mehra, Rohit; Kaffenberger, Samuel; Salami, Simpa S.; Kane, Christopher; Pollack, Alan; Den, Robert B.; Berlin, Alejandro; Schaeffer, Edward M.; Nguyen, Paul L.; Feng, Felix Y.; Spratt, Daniel E. | PROSTATE CANCER AND PROSTATIC DISEASES | 2020 |      |    | 0 | 0 |
| Proteomic and genomic biomarkers for Non-Small Cell Lung Cancer: Peroxiredoxin, Haptoglobin, and Alpha-1 antitrypsin                                                          | Najafi, Zahra; Mohamadnia, Abdolreza; Ahmadi, Rahim; Mahmoudi, Minoo; Bahrami, Naghmeh; Khosravi, Adnan; Jamaati, Hamidreza; Tabarsi, Payam; Dizaji, Mehdi Kazem Pour; Shirian, Sadegh                                                                                                                                                                                                                                                                                                             | CANCER MEDICINE                        | 2020 | 9    | 11 | 0 | 0 |

|                                                                                                                                       |                                                                                                                                                                                                                                                                                                                                                                                                                  |                                            |      |     |    |   |   |
|---------------------------------------------------------------------------------------------------------------------------------------|------------------------------------------------------------------------------------------------------------------------------------------------------------------------------------------------------------------------------------------------------------------------------------------------------------------------------------------------------------------------------------------------------------------|--------------------------------------------|------|-----|----|---|---|
| Differential expression of circulating serum miR-1249-3p, miR-3195, and miR-3692-3p in non-small cell lung cancer                     | Kumar, Sachin; Sharawat, Surender K.; Ali, Ashraf; Gaur, Vikas; Malik, Prabhat Singh; Pandey, Monu; Kumar, Sunil; Mohan, Anant; Guleria, Randeep                                                                                                                                                                                                                                                                 | HUMAN CELL                                 | 2020 | 33  | 3  | 0 | 0 |
| Intratumoral heterogeneity and genetic characteristics of prostate cancer                                                             | Wu, Bo; Lu, Xin; Shen, Haibo; Yuan, Xiaobin; Wang, Xin; Yin, Nan; Sun, Libin; Shen, Pengliang; Hu, Caoyang; Jiang, Huanrong; Wang, Dongwen                                                                                                                                                                                                                                                                       | INTERNATIONAL JOURNAL OF CANCER            | 2020 | 146 | 12 | 0 | 0 |
| Type 2 diabetes induced microbiome dysbiosis is associated with therapy resistance in pancreatic adenocarcinoma                       | Kesh, Kousik; Mendez, Roberto; Abdelrahman, Leila; Banerjee, Santanu; Banerjee, Sulagna                                                                                                                                                                                                                                                                                                                          | MICROBIAL CELL FACTORIES                   | 2020 | 19  | 1  | 0 | 0 |
| A novel stratification framework for predicting outcome in patients with prostate cancer                                              | Luca, Bogdan-Alexandru; Moulton, Vincent; Ellis, Christopher; Edwards, Dylan R.; Campbell, Colin; Cooper, Rosalin A.; Clark, Jeremy; Brewer, Daniel S.; Cooper, Colin S.                                                                                                                                                                                                                                         | BRITISH JOURNAL OF CANCER                  | 2020 | 122 | 10 | 0 | 0 |
| Identification of the differentially expressed protein biomarkers in rat blood plasma in response to gamma irradiation                | Sun, Jia-Li; Li, Shuang; Lu, Xue; Feng, Jiang-Bin; Cai, Tian-Jing; Tian, Mei; Liu, Qing-Jie                                                                                                                                                                                                                                                                                                                      | INTERNATIONAL JOURNAL OF RADIATION BIOLOGY | 2020 | 96  | 6  | 0 | 0 |
| Prostate cancer: more effective use of underutilized postoperative radiation therapy                                                  | Motterle, Giovanni; Morlacco, Alessandro; Zattoni, Fabio; Karnes, R. Jeffrey                                                                                                                                                                                                                                                                                                                                     | EXPERT REVIEW OF ANTICANCER THERAPY        | 2020 | 20  | 4  | 0 | 0 |
| Loss of the adhesion molecule CEACAM1 is associated with early biochemical recurrence in TMPRSS2:ERG fusion-positive prostate cancers | Luebke, Andreas M.; Ricken, Wiebke; Kluth, Martina; Hube-Magg, Claudia; Schroeder, Cornelia; Buescheck, Franziska; Moeller, Katharina; Dum, David; Hoeflmayer, Doris; Weidemann, Soeren; Fraune, Christoph; Hinsch, Andrea; Wittmer, Corinna; Schlomm, Thorsten; Huland, Hartwig; Heinzer, Hans; Graefen, Markus; Haese, Alexander; Minner, Sarah; Simon, Ronald; Sauter, Guido; Wilczak, Waldemar; Meiners, Jan | INTERNATIONAL JOURNAL OF CANCER            | 2020 | 147 | 2  | 0 | 0 |

|                                                                                                                                                        |                                                                                                                                                                                                                                                                                                    |                                                                                 |      |     |    |   |   |
|--------------------------------------------------------------------------------------------------------------------------------------------------------|----------------------------------------------------------------------------------------------------------------------------------------------------------------------------------------------------------------------------------------------------------------------------------------------------|---------------------------------------------------------------------------------|------|-----|----|---|---|
| Harnessing cell-free DNA: plasma circulating tumour DNA for liquid biopsy in genitourinary cancers                                                     | Maia, Manuel Caitano; Salgia, Meghan; Pal, Sumanta K.                                                                                                                                                                                                                                              | NATURE REVIEWS UROLOGY                                                          | 2020 | 17  | 5  | 0 | 0 |
| Glandular orientation and shape determined by computational pathology could identify aggressive tumor for early colon carcinoma: a triple-center study | Ji, Meng-Yao; Yuan, Lei; Lu, Shi-Min; Gao, Meng-Ting; Zeng, Zhi; Zhan, Na; Ding, Yi-Juan; Liu, Zheng-Ru; Huang, Ping-Xiao; Lu, Cheng; Dong, Wei-Guo                                                                                                                                                | JOURNAL OF TRANSLATIONAL MEDICINE                                               | 2020 | 18  | 1  | 0 | 0 |
| Network-based multi-task learning models for biomarker selection and cancer outcome prediction                                                         | Wang, Zhibo; He, Zhezhi; Shah, Milan; Zhang, Teng; Fan, Deliang; Zhang, Wei                                                                                                                                                                                                                        | BIOINFORMATICS                                                                  | 2020 | 36  | 6  | 0 | 0 |
| The role of actinin-4 (ACTN4) in exosomes as a potential novel therapeutic target in castration-resistant prostate cancer                              | Ishizuya, Yu; Uemura, Motohide; Narumi, Ryohei; Tomiyama, Eisuke; Koh, Yoko; Matsushita, Makoto; Nakano, Kosuke; Hayashi, Yujiro; Wang, Cong; Kato, Taigo; Hatano, Koji; Kawashima, Atsunari; Ujike, Takeshi; Fujita, Kazutoshi; Imamura, Ryoichi; Adachi, Jun; Tomonaga, Takeshi; Nonomura, Norio | BIOCHEMICAL AND BIOPHYSICAL RESEARCH COMMUNICATIONS                             | 2020 | 523 | 3  | 0 | 0 |
| Pathway-guided analysis identifies Myc-dependent alternative pre-mRNA splicing in aggressive prostate cancers                                          | Phillips, John W.; Pan, Yang; Tsai, Brandon L.; Xie, Zhijie; Demirdjian, Levon; Xiao, Wen; Yang, Harry T.; Zhang, Yida; Lin, Chia Ho; Cheng, Donghui; Hu, Qiang; Liu, Song; Black, Douglas L.; Witte, Owen N.; Xing, Yi                                                                            | PROCEEDINGS OF THE NATIONAL ACADEMY OF SCIENCES OF THE UNITED STATES OF AMERICA | 2020 | 117 | 10 | 0 | 0 |
| Construction of a replication-competent retroviral vector for expression of the VSV-G envelope glycoprotein for cancer gene therapy                    | Jin, Sae Young; Jung, Yong-Tae                                                                                                                                                                                                                                                                     | ARCHIVES OF VIROLOGY                                                            | 2020 | 165 | 5  | 0 | 0 |

|                                                                                                                                                 |                                                                                                                                                                                                                                                                                                                                                                                                                                                                                      |                                        |      |    |     |   |   |
|-------------------------------------------------------------------------------------------------------------------------------------------------|--------------------------------------------------------------------------------------------------------------------------------------------------------------------------------------------------------------------------------------------------------------------------------------------------------------------------------------------------------------------------------------------------------------------------------------------------------------------------------------|----------------------------------------|------|----|-----|---|---|
| CNV Radar: an improved method for somatic copy number alteration characterization in oncology                                                   | Soong, David; Stratford, Jeran; Avet-Loiseau, Herve; Bahlis, Nizar; Davies, Faith; Dispenzieri, Angela; Sasser, A. Kate; Schecter, Jordan M.; Qi, Ming; Brown, Chad; Jones, Wendell; Keats, Jonathan J.; Auclair, Daniel; Chiu, Christopher; Powers, Jason; Schaffer, Michael                                                                                                                                                                                                        | BMC BIOINFORMATICS                     | 2020 | 21 | 1   | 0 | 0 |
| Immunotherapy for castration-resistant prostate cancer: has its time arrived?                                                                   | Slovin, Susan F.                                                                                                                                                                                                                                                                                                                                                                                                                                                                     | EXPERT OPINION ON BIOLOGICAL THERAPY   | 2020 | 20 | 5   | 0 | 0 |
| Upregulation of the transcription factor TFAP2D is associated with aggressive tumor phenotype in prostate cancer lacking the TMPRSS2:ERG fusion | Fraune, Christoph; Harms, Luisa; Buescheck, Franziska; Hoeflmayer, Doris; Tsourlakis, Maria Christina; Clauditz, Till S.; Simon, Ronald; Moeller, Katharina; Luebke, Andreas M.; Moeller-Koop, Christina; Steurer, Stefan; Hube-Magg, Claudia; Sauter, Guido; Weidemann, Soeren; Lebok, Patrick; Dum, David; Kind, Simon; Minner, Sarah; Izbicki, Jakob R.; Schlomm, Thorsten; Huland, Hartwig; Heinzer, Hans; Burandt, Eike; Haese, Alexander; Graefen, Markus; Schroeder, Cornelia | MOLECULAR MEDICINE                     | 2020 | 26 | 1   | 0 | 0 |
| Androgen receptor variant-driven prostate cancer II: advances in laboratory investigations                                                      | Lu, Changxue; Brown, Landon C.; Antonarakis, Emmanuel S.; Armstrong, Andrew J.; Luo, Jun                                                                                                                                                                                                                                                                                                                                                                                             | PROSTATE CANCER AND PROSTATIC DISEASES | 2020 |    |     | 0 | 0 |
| Knowing what's growing: Why ductal and intraductal prostate cancer matter                                                                       | Lawrence, Mitchell G.; Porter, Laura H.; Clouston, David; Murphy, Declan G.; Frydenberg, Mark; Taylor, Renea A.; Risbridger, Gail P.                                                                                                                                                                                                                                                                                                                                                 | SCIENCE TRANSLATIONAL MEDICINE         | 2020 | 12 | 533 | 0 | 0 |
| Mutational and transcriptomic landscapes of a rare human prostate basal cell carcinoma                                                          | Su, Xianbin; Long, Qi; Bo, Juanjie; Shi, Yi; Zhao, Li-Nan; Lin, Yingxin; Luo, Qing; Ghazanfar, Shila; Zhang, Chao; Liu, Qiang; Wang, Lan; He, Kunyan; He, Jian; Cui, Xiaofang; Yang, Jean Y. H.; Han, Ze-Guang; Yang, Guoliang; Sha, Jian-jun                                                                                                                                                                                                                                        | PROSTATE                               | 2020 | 80 | 6   | 0 | 0 |

|                                                                                                                                                         |                                                                                                                                                                                                                                                                                                                                                                                                                                                 |                                                    |      |     |    |   |   |
|---------------------------------------------------------------------------------------------------------------------------------------------------------|-------------------------------------------------------------------------------------------------------------------------------------------------------------------------------------------------------------------------------------------------------------------------------------------------------------------------------------------------------------------------------------------------------------------------------------------------|----------------------------------------------------|------|-----|----|---|---|
| Exosomes are the Driving Force in Preparing the Soil for the Metastatic Seeds: Lessons from the Prostate Cancer                                         | Saber, Saber H.; Ali, Hamdy E. A.; Gaballa, Rofaida; Gaballah, Mohamed; Ali, Hamed, I; Zerfaoui, Mourad; Abd Elmageed, Zakaria Y.                                                                                                                                                                                                                                                                                                               | CELLS                                              | 2020 | 9   | 3  | 0 | 0 |
| The Oncogenic Potential of the Centromeric Border Protein FAM84B of the 8q24.21 Gene Desert                                                             | Gu, Yan; Lin, Xiaozeng; Kapoor, Anil; Chow, Mathilda Jing; Jiang, Yanzhi; Zhao, Kuncheng; Tang, Damu                                                                                                                                                                                                                                                                                                                                            | GENES                                              | 2020 | 11  | 3  | 0 | 0 |
| TMPRSS2-Erg/AR-V7: Prognostic value of tests in urine and biopsy rince material in prostate cancer                                                      | Plante, G.; Bories, P-N; Denjean, L.; Pigat, N.; Sibony, M.; Goffin, V; Delongchamps, N. Barry                                                                                                                                                                                                                                                                                                                                                  | PROGRES EN UROLOGIE                                | 2020 | 30  | 3  | 0 | 0 |
| Isoquinoline thiosemicarbazone displays potent anticancer activity with in vivo efficacy against aggressive leukemias                                   | Sun, Daniel L.; Poddar, Soumya; Pan, Roy D.; Rosser, Ethan W.; Abt, Evan R.; Van Valkenburgh, Juno; Le, Thuc M.; Lok, Vincent; Hernandez, Selena P.; Song, Janet; Li, Joanna; Turlik, Aneta; Chen, Xiaohong; Cheng, Chi-An; Chen, Wei; Mona, Christine E.; Stuparu, Andreea D.; Vergnes, Laurent; Reue, Karen; Damoiseaux, Robert; Zink, Jeffrey I.; Czernin, Johannes; Donahue, Timothy R.; Houk, Kendall N.; Jung, Michael E.; Radu, Caius G. | RSC MEDICINAL CHEMISTRY                            | 2020 | 11  | 3  | 0 | 0 |
| Human prostasomes an extracellular vesicle - Biomarkers for male infertility and prostrate cancer: The journey from identification to current knowledge | Vickram, A. S.; Samad, Hari Abdul; Latheef, Shyma K.; Chakraborty, Sandip; Dhama, Kuldeep; Sridharan, T. B.; Sundaram, Thanigaivel; Gulothungan, G.                                                                                                                                                                                                                                                                                             | INTERNATIONAL JOURNAL OF BIOLOGICAL MACROMOLECULES | 2020 | 146 |    | 0 | 0 |
| Radiation Biomarkers: Can Small Businesses Drive Accurate Radiation Precision Medicine?                                                                 | Prasanna, Pataje G. S.; Narayanan, Deepa; Zhang, Kehui; Rahbar, Amir; Coleman, C. Norman; Vikram, Bhadrasain                                                                                                                                                                                                                                                                                                                                    | RADIATION RESEARCH                                 | 2020 | 193 | 3  | 0 | 0 |
| Systematic characterization of chromatin modifying enzymes identifies KDM3B as a critical regulator in castration resistant prostate cancer             | Sarac, Hilal; Morova, Tunc; Pires, Elisabete; McCullagh, James; Kaplan, Anil; Cingoz, Ahmet; Bagci-Onder, Tugba; onder, Tamer; Kawamura, Akane; Lack, Nathan A.                                                                                                                                                                                                                                                                                 | ONCOGENE                                           | 2020 | 39  | 10 | 0 | 0 |

|                                                                                                                                                                        |                                                                                                                                                                                                      |                                             |      |     |   |   |   |
|------------------------------------------------------------------------------------------------------------------------------------------------------------------------|------------------------------------------------------------------------------------------------------------------------------------------------------------------------------------------------------|---------------------------------------------|------|-----|---|---|---|
| Targeted next-generation sequencing for locally advanced prostate cancer in the Korean population                                                                      | Suh, Jungyo; Jeong, Chang Wook; Choi, Seongmin; Ku, Ja Hyeon; Kim, Hyeon Hoe; Kim, Kwang Soo; Kwak, Cheol                                                                                            | INVESTIGATIVE AND CLINICAL UROLOGY          | 2020 | 61  | 2 | 0 | 0 |
| Updates in Histologic Grading of Urologic Neoplasms                                                                                                                    | Rice-Stitt, Travis; Valencia-Guerrero, Aida; Cornejo, Kristine M.; Wu, Chin-Lee                                                                                                                      | ARCHIVES OF PATHOLOGY & LABORATORY MEDICINE | 2020 | 144 | 3 | 0 | 0 |
| Identification of Novel Prognosis and Prediction Markers in Advanced Prostate Cancer Tissues Based on Quantitative Proteomics                                          | Kwon, Oh Kwang; Ha, Yun-Sok; Na, Ann-Yae; Chun, So Young; Kwon, Tae Gyun; Lee, Jun Nyung; Lee, Sangkyu                                                                                               | CANCER GENOMICS & PROTEOMICS                | 2020 | 17  | 2 | 0 | 0 |
| The influence of single-nucleotide polymorphisms on overall survival and toxicity in cabazitaxel-treated patients with metastatic castration-resistant prostate cancer | Belderbos, Bodine P. S.; De With, Mirjam; Singh, Rajbir K.; Agema, Bram C.; El Bouazzaoui, Samira; Oomen-de Hoop, Esther; De Wit, Ronald; Van Schaik, Ron H. N.; Mathijssen, Ron H. J.; Bins, Sander | CANCER CHEMOTHERAPY AND PHARMACOLOGY        | 2020 | 85  | 3 | 0 | 0 |
| SIRPB1 promotes prostate cancer cell proliferation via Akt activation                                                                                                  | Song, Qiong; Qin, Siyuan; Pascal, Laura E.; Zou, Chunlin; Wang, Wenchu; Tong, Haibo; Zhang, Jian; Catalona, William J.; Dhir, Rajiv; Morrell, Megan; Balasubramani, Goundappa K.; Lu, Yi; Wang, Zhou | PROSTATE                                    | 2020 | 80  | 4 | 0 | 0 |
| Integrative Analysis of MicroRNA and Gene Interactions for Revealing Candidate Signatures in Prostate Cancer                                                           | Wei, Jingchao; Yin, Yinghao; Deng, Qiancheng; Zhou, Jun; Wang, Yong; Yin, Guangming; Yang, Jianfu; Tang, Yuxin                                                                                       | FRONTIERS IN GENETICS                       | 2020 | 11  |   | 0 | 0 |
| Androgen receptor variant-driven prostate cancer II: advances in clinical investigation                                                                                | Brown, Landon C.; Lu, Changxue; Antonarakis, Emmanuel S.; Luo, Jun; Armstrong, Andrew J.                                                                                                             | PROSTATE CANCER AND PROSTATIC DISEASES      | 2020 |     |   | 0 | 0 |
| An Automatable Hydrogel Culture Platform for Evaluating Efficacy of Antibody-Based Therapeutics in Overcoming Chemoresistance                                          | Kletzmayer, Anna; Clement Frey, Flurina; Zimmermann, Miriam; Eberli, Daniel; Millan, Christopher                                                                                                     | BIOTECHNOLOGY JOURNAL                       | 2020 | 15  | 5 | 0 | 0 |



|                                                                                                                                                                                                                                            |                                                                                                                                                                                                                                                              |                               |      |      |   |   |   |
|--------------------------------------------------------------------------------------------------------------------------------------------------------------------------------------------------------------------------------------------|--------------------------------------------------------------------------------------------------------------------------------------------------------------------------------------------------------------------------------------------------------------|-------------------------------|------|------|---|---|---|
| Multiparametric magnetic resonance imaging of multifocal prostate cancer to reveal intra-prostatic genomic heterogeneity and novel radio-genomic correlates: Results of the Smarter Prostate Interventions and Therapeutics (SPIRIT) study | Bauman, Glenn; Correa, Rohann; Aref-Eshghi, Erfan; Alfano, Ryan; Sadikovic, Bekim; Bartlett, John; Boutros, Paul Christopher; Pautler, Stephen E.; Chin, Joseph; Gaed, Mena; Kassam, Zahra; Lemus, Jose Gomez; Moussa, Madeleine; Ward, Aaron                | JOURNAL OF CLINICAL ONCOLOGY  | 2020 | 38   | 6 | 0 | 0 |
| Circulating tumor cell (CTC) genomic signatures of hormone therapy resistance in men with metastatic castration-resistant prostate cancer (mCRPC)                                                                                          | Gupta, Santosh; Halabi, Susan; Kemeny, Gabor; Anand, Monika; Nanus, David M.; Giannakakou, Paraskevi; George, Daniel J.; Gregory, Simon; Armstrong, Andrew J.                                                                                                | JOURNAL OF CLINICAL ONCOLOGY  | 2020 | 38   | 6 | 0 | 0 |
| Comprehensive genomic profiling (CGP) of metastatic castrate-sensitive prostate cancer (mCSPC) to reveal potential biomarkers and therapeutic targets                                                                                      | Jiang, Di Maria; Wong, Bryan; Hansen, Aaron Richard; Fallah-Rad, Nazanin; Sacher, Adrian G.; Zhang, Tong; Selvarajah, Shamini; Stockley, Tracy; Bedard, Philippe L.; Sridhar, Srikala S.                                                                     | JOURNAL OF CLINICAL ONCOLOGY  | 2020 | 38   | 6 | 0 | 0 |
| A tale of lineage plasticity: Intense neoadjuvant testosterone lowering therapy in localized prostate cancer (PCa) harboring high-risk genomic signatures                                                                                  | Karzai, Fatima; Madan, Ravi Amrit; Sowalsky, Adam G.; Bilusic, Marijo; Chun, Guinevere; Cordes, Lisa M.; Wilkinson, Scott C.; Terrigino, Nicholas; Harmon, Stephanie; Pinto, Peter A.; Choyke, Peter L.; Turkbey, Baris; Gulley, James L.; Dahut, William L. | JOURNAL OF CLINICAL ONCOLOGY  | 2020 | 38   | 6 | 0 | 0 |
| Clinical-genomic sub-classification of high-risk prostate cancer: Implications for tailoring therapy and clinical trial design                                                                                                             | Muralidhar, Vinayak; Alshalalfa, Mohammed; Spratt, Daniel Eidelberg; Liu, Yang; Karnes, R. Jeffrey; Schaeffer, Edward M.; Davicioni, Elai; Feng, Felix Y.; Klein, Eric A.; Tosoian, Jeffrey J.; Berlin, Alejandro; Den, Robert Benjamin; Nguyen, Paul L.     | JOURNAL OF CLINICAL ONCOLOGY  | 2020 | 38   | 6 | 0 | 0 |
| Recurrence-Associated Multi-RNA Signature to Predict Disease-Free Survival for Ovarian Cancer Patients                                                                                                                                     | Zhang, Yu; Ye, Qingjian; He, Junxian; Chen, Peigen; Wan, Jing; Li, Jing; Yang, Yuebo; Li, Xiaomao                                                                                                                                                            | BIOMED RESEARCH INTERNATIONAL | 2020 | 2020 |   | 0 | 0 |

|                                                                                                                                                                     |                                                                                                                                                                                                   |                                |      |     |     |   |   |
|---------------------------------------------------------------------------------------------------------------------------------------------------------------------|---------------------------------------------------------------------------------------------------------------------------------------------------------------------------------------------------|--------------------------------|------|-----|-----|---|---|
| Pan-cancer clinical and molecular analysis of racial disparities                                                                                                    | Lara, Olivia D.; Wang, Ying; Asare, Amma; Xu, Tao; Chiu, Hua-Sheng; Liu, Yuexin; Hu, Wei; Sumazin, Pavel; Uppal, Shitanshu; Zhang, Lin; Rauh-Hain, J. Alejandro; Sood, Anil K.                    | CANCER                         | 2020 | 126 | 4   | 0 | 0 |
| The Rare Variant rs35356162 in UHRF1BP1 Increases Bladder Cancer Risk in Han Chinese Population                                                                     | Wu, Junlong; Wang, Meilin; Chen, Haitao; Xu, Jianfeng; Zhang, Guiming; Gu, Chengyuan; Ding, Qiang; Wei, Qingyi; Zhu, Yao; Ye, Dingwei                                                             | FRONTIERS IN ONCOLOGY          | 2020 | 10  |     | 0 | 0 |
| Characterising a human endogenous retrovirus(HERV)-derived tumour-associated antigen: enriched RNA-Seq analysis of HERV-K(HML-2) in mantle cell lymphoma cell lines | Tatkiewicz, Witold; Dickie, James; Bedford, Franchesca; Jones, Alexander; Atkin, Mark; Kiernan, Michele; Maze, Emmanuel Atangana; Agit, Bora; Farnham, Garry; Kanapin, Alexander; Belshaw, Robert | MOBILE DNA                     | 2020 | 11  | 1   | 0 | 0 |
| A Three-Gene Classifier Associated With MicroRNA-Mediated Regulation Predicts Prostate Cancer Recurrence After Radical Prostatectomy                                | Cheng, Bo; He, Qidan; Cheng, Yong; Yang, Haifan; Pei, Lijun; Deng, Qingfu; Long, Hao; Zhu, Likun; Jiang, Rui                                                                                      | FRONTIERS IN GENETICS          | 2020 | 10  |     | 0 | 0 |
| Decreased glucose bioavailability and elevated aspartate metabolism in prostate cancer cells undergoing epithelial-mesenchymal transition                           | Chen, Yule; Wang, Ke; Liu, Tianjie; Chen, Jiaqi; Lv, Wei; Yang, Wenjie; Xu, Shan; Wang, Xinyang; Li, Lei                                                                                          | JOURNAL OF CELLULAR PHYSIOLOGY | 2020 | 235 | 7-8 | 0 | 0 |
| Genome-wide analysis of HOXC4 and HOXC6 regulated genes and binding sites in prostate cancer cells                                                                  | Luo, Zhifei; Farnham, Peggy J.                                                                                                                                                                    | PLOS ONE                       | 2020 | 15  | 2   | 0 | 0 |
| Leukocyte telomere length is associated with aggressive prostate cancer in localized prostate cancer patients                                                       | Xu, Junfeng; Chang, Wen-Shin; Tsai, Chia-Wen; Bau, Da-Tian; Xu, Yifan; Davis, John W.; Thompson, Timothy C.; Logothetis, Christopher J.; Gu, Jian                                                 | EBIOMEDICINE                   | 2020 | 52  |     | 0 | 0 |
| A risk prediction model of DNA methylation improves prognosis evaluation and indicates gene targets in prostate cancer                                              | Zhang, Enchong; Hou, Xueying; Hou, Baoxian; Zhang, Mo; Song, Yongsheng                                                                                                                            | EPIGENOMICS                    | 2020 | 12  | 4   | 0 | 0 |

|                                                                                                                                                 |                                                                                                                                                                                                                                                                                                                                                                         |                               |      |    |   |   |   |
|-------------------------------------------------------------------------------------------------------------------------------------------------|-------------------------------------------------------------------------------------------------------------------------------------------------------------------------------------------------------------------------------------------------------------------------------------------------------------------------------------------------------------------------|-------------------------------|------|----|---|---|---|
| Variants in the 8q24 region associated with risk of breast cancer Systematic research synopsis and meta-analysis                                | Wang Xuedong; He Xian; Guo Hui; Tong Yu                                                                                                                                                                                                                                                                                                                                 | MEDICINE                      | 2020 | 99 | 8 | 0 | 0 |
| The miR-28-5p Targetome Discovery Identified SREBF2 as One of the Mediators of the miR-28-5p Tumor Suppressor Activity in Prostate Cancer Cells | Fazio, Sofia; Berti, Gabriele; Russo, Francesco; Evangelista, Monica; D'Aurizio, Romina; Mercatanti, Alberto; Pellegrini, Marco; Rizzo, Milena                                                                                                                                                                                                                          | CELLS                         | 2020 | 9  | 2 | 0 | 0 |
| A Comprehensive Analysis of FUT8 Overexpressing Prostate Cancer Cells Reveals the Role of EGFR in Castration Resistance                         | Hoti, Naseruddin; Lih, Tung-Shing; Pan, Jianbo; Zhou, Yangying; Yang, Ganglong; Deng, Ashely; Chen, Lijun; Dong, Mingming; Yang, Ruey-Bing; Tu, Cheng-Fen; Haffner, Michael C.; Li, Qing Kay; Zhang, Hui                                                                                                                                                                | CANCERS                       | 2020 | 12 | 2 | 0 | 0 |
| The Urinary Transcriptome as a Source of Biomarkers for Prostate Cancer                                                                         | Sole, Carla; Goicoechea, Ibai; Goni, Alai; Schramm, Maike; Armesto, Maria; Arestin, Maria; Manterola, Lorea; Tellaetxe, Maitena; Alberdi, Aitor; Nogueira, Leonor; Roumiguie, Mathieu; Ignacio Lopez, Jose; Sanz Jaka, Juan Pablo; Urruticoechea, Ander; Vergara, Itziar; Loizaga-Iriarte, Ana; Unda, Miguel; Carracedo, Arkaitz; Malavaud, Bernard; Lawrie, Charles H. | CANCERS                       | 2020 | 12 | 2 | 0 | 0 |
| MiRNA-Based Inspired Approach in Diagnosis of Prostate Cancer                                                                                   | Munteanu, Vlad Cristian; Munteanu, Raluca Andrada; Onaciu, Anca; Berindan-Neagoe, Ioana; Petrut, Bogdan; Coman, Ioan                                                                                                                                                                                                                                                    | MEDICINA-LITHUANIA            | 2020 | 56 | 2 | 0 | 0 |
| Screening key miRNAs and genes in prostate cancer by microarray analysis                                                                        | Wu, Jianhui; Li, Xuemei; Luo, Fei; Yan, Jun; Yang, Kuo                                                                                                                                                                                                                                                                                                                  | TRANSLATIONAL CANCER RESEARCH | 2020 | 9  | 2 | 0 | 0 |
| Biomarker selection and imaging design in cancer: A link with biochemical pathways for imminent engineering                                     | Ali, Joham Surfraz; ul Ain, Noor; Naz, Sania; Zia, Muhammad                                                                                                                                                                                                                                                                                                             | HELIYON                       | 2020 | 6  | 2 | 0 | 0 |

|                                                                                                                                       |                                                                                                                                                                                                                                                                                                                              |                                          |      |     |   |   |   |
|---------------------------------------------------------------------------------------------------------------------------------------|------------------------------------------------------------------------------------------------------------------------------------------------------------------------------------------------------------------------------------------------------------------------------------------------------------------------------|------------------------------------------|------|-----|---|---|---|
| How and when to refer patients for oncogenetic counseling in the era of PARP inhibitors                                               | Neviere, Zoe; Rouge, Thibault De La Motte; Floquet, Anne; Johnson, Alison; Berthet, Pascaline; Joly, Florence                                                                                                                                                                                                                | THERAPEUTIC ADVANCES IN MEDICAL ONCOLOGY | 2020 | 12  |   | 0 | 0 |
| USP22 Functions as an Oncogenic Driver in Prostate Cancer by Regulating Cell Proliferation and DNA Repair                             | McCann, Jennifer J.; Vasilevskaya, Irina A.; Neupane, Neermala Poudel; Shafi, Ayesha A.; McNair, Christopher; Dylgjeri, Emanuela; Mandigo, Amy C.; Schiewer, Matthew; Schrecengost, Randy S.; Gallagher, Peter; Stanek, Timothy J.; McMahon, Steven B.; Berman-Booty, Lisa D.; Ostrander, William F., Jr.; Knudsen, Karen E. | CANCER RESEARCH                          | 2020 | 80  | 3 | 0 | 0 |
| Androgen Receptor Splice Variant, AR-V7, as a Biomarker of Resistance to Androgen Axis-Targeted Therapies in Advanced Prostate Cancer | Zhang, Tian; Karsh, Lawrence I.; Nissenblatt, Michael J.; Canfield, Steven E.                                                                                                                                                                                                                                                | CLINICAL GENITOURINARY CANCER            | 2020 | 18  | 1 | 0 | 0 |
| Enzalutamide in Combination with Abiraterone Acetate in Bone Metastatic Castration-resistant Prostate Cancer Patients                 | Efstathiou, Eleni; Titus, Mark; Wen, Sijin; Troncoso, Patricia; Hoang, Anh; Corn, Paul; Prokhorova, Ina; Araujo, John; Dmuchowski, Carl; Melhem-Bertrandt, Amal; Patil, Shiva; Logothetis, Christopher J.                                                                                                                    | EUROPEAN UROLOGY ONCOLOGY                | 2020 | 3   | 1 | 0 | 0 |
| Correlation between mouse age and human age in anti-tumor research: Significance and method establishment                             | Wang, Shuo; Lai, Xiaoxue; Deng, Yihui; Song, Yanzhi                                                                                                                                                                                                                                                                          | LIFE SCIENCES                            | 2020 | 242 |   | 0 | 0 |
| The ternary complex factor protein ELK1 is an independent prognosticator of disease recurrence in prostate cancer                     | Pardy, Luke; Rosati, Rayna; Soave, Claire; Huang, Yanfang; Kim, Seongho; Ratnam, Manohar                                                                                                                                                                                                                                     | PROSTATE                                 | 2020 | 80  | 2 | 0 | 0 |

|                                                                                                                                                                                          |                                                                                                                                                                                                                                                                                        |                                           |      |      |   |   |   |
|------------------------------------------------------------------------------------------------------------------------------------------------------------------------------------------|----------------------------------------------------------------------------------------------------------------------------------------------------------------------------------------------------------------------------------------------------------------------------------------|-------------------------------------------|------|------|---|---|---|
| GC-MS-Based Metabolomic Profiles Combined with Chemometric Tools and Cytotoxic Activities of Non-Polar Leaf Extracts of <i>Spondias mombin</i> L. and <i>Spondias tuberosa</i> Arr. Cam. | Guedes, Jhonyson A. C.; Alves Filho, Elenilson G.; Silva, Maria F. S.; Rodrigues, Tigressa H. S.; Ramires, Christian M. C.; Lima, Maria A. C.; Silva, Gisele S.; Pessoa, Claudia O.; Canuto, Kirley M.; Brito, Edy S.; Alves, Ricardo E.; Nascimento, Ronaldo F.; Zocolo, Guilherme J. | JOURNAL OF THE BRAZILIAN CHEMICAL SOCIETY | 2020 | 31   | 2 | 0 | 0 |
| Evaluating liquid biopsies for methylomic profiling of prostate cancer                                                                                                                   | Silva, Romina; Moran, Bruce; Russell, Niamh M.; Fahey, Ciara; Vlajnic, Tatjana; Manecksha, Rustom P.; Finn, Stephen P.; Brennan, Donal J.; Gallagher, William M.; Perry, Antoinette S.                                                                                                 | EPIGENETICS                               | 2020 |      |   | 0 | 0 |
| Pairing Microwell Arrays with an Affordable, Semiautomated Single-Cell Aspirator for the Interrogation of Circulating Tumor Cell Heterogeneity                                           | Tokar, Jacob J.; Stahlfeld, Charlotte N.; Sperger, Jamie M.; Niles, David J.; Beebe, David J.; Lang, Joshua M.; Warrick, Jay W.                                                                                                                                                        | SLAS TECHNOLOGY                           | 2020 | 25   | 2 | 0 | 0 |
| miR-210 is induced by hypoxia and regulates neural cell adhesion molecule in prostate cells                                                                                              | Angel, Charlotte Zoe; Lynch, Seodhna M.; Nesbitt, Heather; McKenna, Michael M.; Walsh, Colum P.; McKenna, Declan J.                                                                                                                                                                    | JOURNAL OF CELLULAR PHYSIOLOGY            | 2020 | 235  | 9 | 0 | 0 |
| Sulfiredoxin as a Potential Therapeutic Target for Advanced and Metastatic Prostate Cancer                                                                                               | Barquilha, Caroline N.; Santos, Nilton J.; Moncao, Caio C. D.; Barbosa, Isabela C.; Lima, Flavio O.; Justulin, Luis A.; Pertega-Gomes, Nelma; Felisbino, Sergio L.                                                                                                                     | OXIDATIVE MEDICINE AND CELLULAR LONGEVITY | 2020 | 2020 |   | 0 | 0 |
| Unleashing the full potential of Hsp90 inhibitors as cancer therapeutics through simultaneous inactivation of Hsp90, Grp94, and TRAP1                                                    | Park, Hye-Kyung; Yoon, Nam Gu; Lee, Ji-Eun; Hu, Sung; Yoon, Sora; Kim, So Yeon; Hong, Jun-Hee; Nam, Dougu; Chae, Young Chan; Park, Jong Bae; Kang, Byoung Heon                                                                                                                         | EXPERIMENTAL AND MOLECULAR MEDICINE       | 2020 |      |   | 0 | 0 |
| Active surveillance in intermediate-risk prostate cancer                                                                                                                                 | Klotz, Laurence                                                                                                                                                                                                                                                                        | BJU INTERNATIONAL                         | 2020 | 125  | 3 | 0 | 0 |

|                                                                                                                                                                        |                                                                                                                                                                                                                                                                                                                                                                         |                                   |      |     |   |   |   |
|------------------------------------------------------------------------------------------------------------------------------------------------------------------------|-------------------------------------------------------------------------------------------------------------------------------------------------------------------------------------------------------------------------------------------------------------------------------------------------------------------------------------------------------------------------|-----------------------------------|------|-----|---|---|---|
| The ETS transcription factor ETV5 is a target of activated ALK in neuroblastoma contributing to increased tumour aggressiveness                                        | Mus, Liselot M.; Lambertz, Irina; Claeys, Shana; Kumps, Candy; Van Looke, Wouter; Van Neste, Christophe; Umapathy, Ganesh; Vaapil, Marica; Bartenhagen, Christoph; Laureys, Genevieve; De Wever, Olivier; Bexell, Daniel; Fischer, Matthias; Hallberg, Bengt; Schulte, Johannes; De Wilde, Bram; Durinck, Kaat; Denecker, Geertrui; De Preter, Katleen; Speleman, Frank | SCIENTIFIC REPORTS                | 2020 | 10  | 1 | 0 | 0 |
| Aggressive prostate cancer with somatic loss of the homologous recombination repair gene FANCA: a case report                                                          | Hongo, Hiroshi; Kosaka, Takeo; Aimono, Eriko; Nishihara, Hiroshi; Oya, Mototsugu                                                                                                                                                                                                                                                                                        | DIAGNOSTIC PATHOLOGY              | 2020 | 15  | 1 | 0 | 0 |
| DNA hypermethylation associated with upregulated gene expression in prostate cancer demonstrates the diversity of epigenetic regulation                                | Rauluseviciute, Ieva; Drablos, Finn; Rye, Morten Beck                                                                                                                                                                                                                                                                                                                   | BMC MEDICAL GENOMICS              | 2020 | 13  | 1 | 0 | 0 |
| Genomic and clinical characterization of stromal infiltration markers in prostate cancer                                                                               | Mahal, Brandon A.; Alshalalfa, Mohammed; Zhao, Shuang G.; Beltran, Himisha; Chen, William S.; Chipidza, Fallon; Davicioni, Elai; Karnes, R. Jeffrey; Ku, Sheng-Yu; Lotan, Tamara L.; Muralidhar, Vinayak; Rebbeck, Timothy R.; Schaeffer, Edward M.; Spratt, Daniel E.; Feng, Felix Y.; Nguyen, Paul L.                                                                 | CANCER                            | 2020 | 126 | 7 | 0 | 0 |
| Metabolic characteristics of large and small extracellular vesicles from pleural effusion reveal biomarker candidates for the diagnosis of tuberculosis and malignancy | Luo, Ping; Mao, Kaimin; Xu, Juanjuan; Wu, Feng; Wang, Xuan; Wang, Sufei; Zhou, Mei; Duan, Limin; Tan, Qi; Ma, Guangzhou; Yang, Guanghai; Du, Ronghui; Huang, Hai; Huang, Qi; Li, Yumei; Guo, Mengfei; Jin, Yang                                                                                                                                                         | JOURNAL OF EXTRACELLULAR VESICLES | 2020 | 9   | 1 | 0 | 0 |
| Comprehensive palmitoyl-proteomic analysis identifies distinct protein signatures for large and small cancer-derived extracellular vesicles                            | Mariscal, Javier; Vagner, Tatyana; Kim, Minhyung; Zhou, Bo; Chin, Andrew; Zandian, Mandana; Freeman, Michael R.; You, Sungyong; Zijlstra, Andries; Yang, Wei; Di Vizio, Dolores                                                                                                                                                                                         | JOURNAL OF EXTRACELLULAR VESICLES | 2020 | 9   | 1 | 0 | 0 |

|                                                                                                                                 |                                                                                                       |                                                             |      |      |    |   |   |
|---------------------------------------------------------------------------------------------------------------------------------|-------------------------------------------------------------------------------------------------------|-------------------------------------------------------------|------|------|----|---|---|
| The Identification of Key Gene Expression Signature in Prostate Cancer                                                          | Yu, Huang; Qi, Cao; Song Zhengshuai; Ruan Hailong; Wang Keshan; Ke, Chen; Zhang Xiaoping              | CRITICAL REVIEWS IN EUKARYOTIC GENE EXPRESSION              | 2020 | 30   | 2  | 0 | 0 |
| Therapeutic Potential of Medicinal Plant Proteins: Present Status and Future Perspectives                                       | Wani, Snober Shabeer; Dar, Parvaiz A.; Zargar, Sajad M.; Dar, Tanveer A.                              | CURRENT PROTEIN & PEPTIDE SCIENCE                           | 2020 | 21   | 5  | 0 | 0 |
| Upregulation of long non-coding RNA ATP6V0E2-AS1 predicts a poor prognosis in prostate cancer                                   | Hu, Shengguo; Li, Youkong; Zhu, Min                                                                   | INTERNATIONAL JOURNAL OF CLINICAL AND EXPERIMENTAL MEDICINE | 2020 | 13   | 5  | 0 | 0 |
| The interactome of the prostate-specific protein Anoctamin 7                                                                    | Kaikkonen, Elina; Takala, Aliisa; Pursiheimo, Juha-Pekka; Wahlstrom, Gudrun; Schleutker, Johanna      | CANCER BIOMARKERS                                           | 2020 | 28   | 1  | 0 | 0 |
| The Power of Phytochemicals Combination in Cancer Chemoprevention                                                               | Rizeq, Balsam; Gupta, Ishita; Ilesanmi, Josephine; AlSafran, Mohammed; Rahman, Mizanur; Ouhtit, Allal | JOURNAL OF CANCER                                           | 2020 | 11   | 15 | 0 | 0 |
| Circulating let-7f-5p improve risk prediction of prostate cancer in patients with benign prostatic hyperplasia                  | Ge, Yuqiu; Wang, Qiangdong; Shao, Wei; Zhao, You; Shi, Qianqian; Yuan, Qinbo; Cui, Li                 | JOURNAL OF CANCER                                           | 2020 | 11   | 15 | 0 | 0 |
| BAP1 functions as a tumor promoter in prostate cancer cells through EMT regulation                                              | Park, Chan Mi; Lee, Jac Eun; Kim, Jung Hwa                                                            | GENETICS AND MOLECULAR BIOLOGY                              | 2020 | 43   | 2  | 0 | 0 |
| Personalized Treatment Approach to Metastatic Castration-Resistant Prostate Cancer with BRCA2 and PTEN Mutations: A Case Report | Julka, Pramod Kumar; Verma, Amit; Gupta, Kush                                                         | CASE REPORTS IN ONCOLOGY                                    | 2020 | 13   | 1  | 0 | 0 |
| Ubiquitin, SUMO, and Nedd8 as Therapeutic Targets in Cancer                                                                     | Gatel, Pierre; Piechaczyk, Marc; Bossis, Guillaume                                                    | PROTEOSTASIS AND DISEASE: FROM BASIC MECHANISMS TO CLINICS  | 2020 | 1233 |    | 0 | 0 |

|                                                                                                                          |                                                                                                                                                                                                                                                              |                                                   |      |    |   |   |   |
|--------------------------------------------------------------------------------------------------------------------------|--------------------------------------------------------------------------------------------------------------------------------------------------------------------------------------------------------------------------------------------------------------|---------------------------------------------------|------|----|---|---|---|
| Combined signature of nine immune-related genes: a novel risk score for predicting prognosis in hepatocellular carcinoma | Tang, Yunliang; Zeng, Zhenguo; Wang, Jiao; Li, Guoyong; Huang, Chao; Dong, Xiaoyang; Feng, Zhen                                                                                                                                                              | AMERICAN JOURNAL OF TRANSLATIONAL RESEARCH        | 2020 | 12 | 4 | 0 | 0 |
| Integrin-associated CD151 is a suppressor of prostate cancer progression                                                 | Han, Rongbo; Hensley, Patrick J.; Li, Jieming; Zhang, Yang; Stark, Timothy W.; Heller, Allie; Qian, Hai; Shi, Junfeng; Liu, Zeyi; Huang, Jian-An; Jin, Tengchuan; Wei, Xiaowei; Zhou, Binhua P.; Wu, Yadi; Kyprianou, Natasha; Chen, Jinfei; Yang, Xiuwei H. | AMERICAN JOURNAL OF TRANSLATIONAL RESEARCH        | 2020 | 12 | 4 | 0 | 0 |
| Discovering Therapeutic Protein Targets for Bladder Cancer Using Proteomic Data Analysis                                 | Bahrami, Samira; Kazemi, Bahram; Zali, Hakimeh; Black, Peter C.; Basiri, Abbas; Bandehpour, Mojgan; Hedayati, Mehdi; Sahebkar, Amirhossein                                                                                                                   | CURRENT MOLECULAR PHARMACOLOGY                    | 2020 | 13 | 2 | 0 | 0 |
| miR-489-3p Inhibits Prostate Cancer Progression by Targeting DLX1                                                        | Bai, Peide; Li, Wei; Wan, Zhenghua; Xiao, Yujuan; Xiao, Wen; Wang, Xuegang; Wu, Zhun; Zhang, Kaiyan; Wang, Yongfeng; Chen, Bin; Xing, Jinchun; Wang, Tao                                                                                                     | CANCER MANAGEMENT AND RESEARCH                    | 2020 | 12 |   | 0 | 0 |
| Identification of key genes involved in the pathogenesis of cutaneous melanoma using bioinformatics analysis             | Chen, Jianqin; Sun, Wen; Mo, Nian; Chen, Xiangjun; Yang, Lihong; Tu, Shaozhong; Zhang, Siwen; Liu, Jing                                                                                                                                                      | JOURNAL OF INTERNATIONAL MEDICAL RESEARCH         | 2020 | 48 | 1 | 0 | 0 |
| Transcriptomic analysis reveals the oncogenic role of S6K1 in hepatocellular carcinoma                                   | Lai, Keng Po; Cheung, Angela; Ho, Cheuk Hin; Tam, Nathan Yi-Kan; Li, Jing Woei; Lin, Xiao; Chan, Ting Fung; Lee, Nikki Pui-Yue; Li, Rong                                                                                                                     | JOURNAL OF CANCER                                 | 2020 | 11 | 9 | 0 | 0 |
| Downregulation of PSCA promotes gastric cancer proliferation and is related to poor prognosis                            | Xu, Li-pu; Qiu, Hai-bo; Yuan, Shu-qiang; Chen, Yong-ming; Zhou, Zhi-wei; Chen, Ying-bo                                                                                                                                                                       | JOURNAL OF CANCER                                 | 2020 | 11 | 9 | 0 | 0 |
| Use of miRNA as a Biomarker in Prostate Cancer and New Approaches                                                        | Aslan, Elif Sibel; Cetinkaya, Sefa                                                                                                                                                                                                                           | TURK ONKOLOJI DERGISI-TURKISH JOURNAL OF ONCOLOGY | 2020 | 35 | 1 | 0 | 0 |



|                                                                                                                                                            |                                                                                                                                                                                 |                                      |      |     |     |   |   |
|------------------------------------------------------------------------------------------------------------------------------------------------------------|---------------------------------------------------------------------------------------------------------------------------------------------------------------------------------|--------------------------------------|------|-----|-----|---|---|
| Integrative Exome Sequencing Analysis in Castration-Resistant Prostate Cancer in Chinese Population                                                        | Hao, Lifang; Li, Hui; Zhang, Su; Yang, Yanlei; Xu, Zhenzhen; Zhang, Yanfen; Liu, Zhongcheng                                                                                     | CURRENT PHARMACEUTICAL BIOTECHNOLOGY | 2020 | 21  | 2   | 0 | 0 |
| Genomic Strategies to Personalize Use of Androgen Deprivation Therapy With Radiotherapy                                                                    | Glicksman, Rachel M.; Berlin, Alejandro                                                                                                                                         | CANCER JOURNAL                       | 2020 | 26  | 1   | 0 | 0 |
| Unleashing the full potential of Hsp90 inhibitors as cancer therapeutics through simultaneous inactivation of Hsp90, Grp94, and TRAP1                      | Park, Hye-Kyung; Yoon, Nam Gu; Lee, Ji-Eun; Hu, Sung; Yoon, Sora; Kim, So Yeon; Hong, Jun-Hee; Nam, Dougu; Chae, Young Chan; Park, Jong Bae; Kang, Byoung Heon                  | EXPERIMENTAL AND MOLECULAR MEDICINE  | 2020 | 52  | 1   | 0 | 0 |
| PTEN deletion drives aberrations of DNA methylome and transcriptome in different stages of prostate cancer                                                 | Wang, Chao; Feng, Yaping; Zhang, Chengyue; Cheng, David; Wu, Renyi; Yang, Yuqing; Sargsyan, Davit; Kumar, Dibyendu; Kong, Ah-Ng                                                 | FASEB JOURNAL                        | 2020 | 34  | 1   | 0 | 0 |
| Germline variants and response to systemic therapy in advanced prostate cancer                                                                             | Johnson, Eric; Nussenzweig, Roberto; Agarwal, Neeraj; Swami, Umang                                                                                                              | PHARMACOGENOMICS                     | 2020 | 21  | 1   | 0 | 0 |
| Identification of novel alternative transcripts of the human Ribonuclease kappa (RNASEK) gene using 3' RACE and high-throughput sequencing approaches      | Adamopoulos, Panagiotis G.; Kontos, Christos K.; Scorilas, Andreas; Sideris, Diamantis C.                                                                                       | GENOMICS                             | 2020 | 112 | 1   | 0 | 0 |
| Prognostic implication and functional annotations of Rad50 expression in patients with prostate cancer                                                     | Xu, Wen-Hao; Wang, Jun; Sheng, Hao-Yue; Qu, Yuan-Yuan; Wang, Hong-Kai; Zhu, Yu; Shi, Guo-Hai; Zhang, Hai-Liang; Ye, Ding-Wei                                                    | JOURNAL OF CELLULAR BIOCHEMISTRY     | 2020 | 121 | 5-6 | 0 | 0 |
| Marked response to cabazitaxel in prostate cancer xenografts expressing androgen receptor variant 7 and reversion of acquired resistance by anti-androgens | Ylitalo, Erik Bovinder; Thysell, Elin; Thellenberg-Karlsson, Camilla; Lundholm, Marie; Widmark, Anders; Bergh, Anders; Josefsson, Andreas; Brattsand, Maria; Wikstrom, Pernilla | PROSTATE                             | 2020 | 80  | 2   | 0 | 0 |

|                                                                                                                                |                                                                                                                                                                                                                                                                                                                                                                                                                                                                           |                                               |      |     |   |   |   |
|--------------------------------------------------------------------------------------------------------------------------------|---------------------------------------------------------------------------------------------------------------------------------------------------------------------------------------------------------------------------------------------------------------------------------------------------------------------------------------------------------------------------------------------------------------------------------------------------------------------------|-----------------------------------------------|------|-----|---|---|---|
| Integrative clinical transcriptome analysis reveals TMPRSS2-ERG dependency of prognostic biomarkers in prostate adenocarcinoma | Gerke, Julia S.; Orth, Martin F.; Tolkach, Yuri; Romero-Perez, Laura; Wehweck, Fabienne S.; Stein, Stefanie; Musa, Julian; Knott, Maximilian M. L.; Hoelting, Tilman L. B.; Li, Jing; Sannino, Giuseppina; Marchetto, Aruna; Ohmura, Shunya; Cidre-Aranaz, Florencia; Mueller-Nurasyid, Martina; Strauch, Konstantin; Stief, Christian; Kristiansen, Glen; Kirchner, Thomas; Buchner, Alexander; Gruenewald, Thomas G. P.                                                 | INTERNATIONAL JOURNAL OF CANCER               | 2020 | 146 | 7 | 0 | 0 |
| Prostate cancer and the role of biomarkers                                                                                     | Nevo, Amihay; Navaratnam, Anojan; Andrews, Paul                                                                                                                                                                                                                                                                                                                                                                                                                           | ABDOMINAL RADIOLOGY                           | 2020 | 45  | 7 | 0 | 0 |
| High RSF1 protein expression is an independent prognostic feature in prostate cancer                                           | Hoeflmayer, Doris; Hamuda, Moslim; Schroeder, Cornelia; Hube-Magg, Claudia; Simon, Ronald; Goebel, Cosima; Hinsch, Andrea; Weidemann, Soeren; Moeller, Katharina; Izbicki, Jacob R.; Jacobsen, Frank; Mandelkow, Tim; Blessin, Niclas C.; Lutz, Florian; Viehweger, Florian; Sauter, Guido; Burandt, Eike; Lebok, Patrick; Lennartz, Maximilian; Fraune, Christoph; Minner, Sarah; Bonk, Sarah; Huland, Hartwig; Graefen, Markus; Schlomm, Thorsten; Buescheck, Franziska | ACTA ONCOLOGICA                               | 2020 | 59  | 3 | 0 | 0 |
| Prostate cancer pathology: What has changed in the last 5 years                                                                | Cimadamore, Alessia; Scarpelli, Marina; Raspollini, Maria Rosaria; Doria, Andrea; Galosi, Andrea Benedetto; Massari, Francesco; Di Nunno, Vincenzo; Cheng, Liang; Lopez-Beltran, Antonio; Montironi, Rodolfo                                                                                                                                                                                                                                                              | UROLOGIA JOURNAL                              | 2020 | 87  | 1 | 0 | 0 |
| Anticancer Characteristics of Fomitopsis pinicola Extract in a Xenograft Mouse Model-a Preliminary Study                       | Kao, Chi H. J.; Greenwood, David R.; Jamieson, Stephen M. F.; Coe, Margaret E.; Murray, Pamela M.; Ferguson, Lynnette R.; Bishop, Karen S.                                                                                                                                                                                                                                                                                                                                | NUTRITION AND CANCER-AN INTERNATIONAL JOURNAL | 2020 | 72  | 4 | 0 | 0 |
