# Supplementary material for: Omics Derived Biomarkers and Novel Drug Targets for Improved Intervention in Advanced Prostate Cancer
Source: MDPI journal article supplement (doi:10.3390/diagnostics10090658), 2020-08-31
Supplement: s1 [file s1]

**Table S2. List of selected manuscripts**

| Title                                                           | Authors                                                                                                                                                                                                                                                                                                                                                                                                                                                                                                                                                                                                                                                                                       | Source Title                    | Publication Year | Volume | Issue | Total Citations | Average per Year |
|-----------------------------------------------------------------|-----------------------------------------------------------------------------------------------------------------------------------------------------------------------------------------------------------------------------------------------------------------------------------------------------------------------------------------------------------------------------------------------------------------------------------------------------------------------------------------------------------------------------------------------------------------------------------------------------------------------------------------------------------------------------------------------|---------------------------------|------------------|--------|-------|-----------------|------------------|
| The landscape of long noncoding RNAs in the human transcriptome | Iyer, Matthew K.; Niknafs, Yashar S.; Malik, Rohit; Singhal, Udit; Sahu, Anirban; Hosono, Yasuyuki; Barrette, Terrence R.; Prensner, John R.; Evans, Joseph R.; Zhao, Shuang; Poliakov, Anton; Cao, Xuhong; Dhanasekaran, Saravana M.; Wu, Yi-Mi; Robinson, Dan R.; Beer, David G.; Feng, Felix Y.; Iyer, Hariharan K.; Chinnaiyan, Arul M.                                                                                                                                                                                                                                                                                                                                                   | NATURE GENETICS                 | 2015             | 47     | 3     | 1100            | 183,33           |
| Long Noncoding RNAs in Cancer Pathways                          | Schmitt, Adam M.; Chang, Howard Y.                                                                                                                                                                                                                                                                                                                                                                                                                                                                                                                                                                                                                                                            | CANCER CELL                     | 2016             | 29     | 4     | 1076            | 215,2            |
| DNA-Repair Defects and Olaparib in Metastatic Prostate Cancer   | Mateo, J.; Carreira, S.; Sandhu, S.; Miranda, S.; Mossop, H.; Perez-Lopez, R.; Rodrigues, D. Nava; Robinson, D.; Omlin, A.; Tunariu, N.; Boysen, G.; Porta, N.; Flohr, P.; Gillman, A.; Figueiredo, I.; Paulding, C.; Seed, G.; Jain, S.; Ralph, C.; Protheroe, A.; Hussain, S.; Jones, R.; Elliott, T.; McGovern, U.; Bianchini, D.; Goodall, J.; Zafeiriou, Z.; Williamson, C. T.; Ferraldeschi, R.; Riisnaes, R.; Ebbs, B.; Fowler, G.; Roda, D.; Yuan, W.; Wu, Y. - M.; Cao, X.; Brough, R.; Pemberton, H.; A'Hern, R.; Swain, A.; Kunju, L. P.; Eeles, R.; Attard, G.; Lord, C. J.; Ashworth, A.; Rubin, M. A.; Knudsen, K. E.; Feng, F. Y.; Chinnaiyan, A. M.; Hall, E.; de Bono, J. S. | NEW ENGLAND JOURNAL OF MEDICINE | 2015             | 373    | 18    | 935             | 155,83           |

|                                                                                                                                 |                                                                                                                                                                                                                                                                                                                                                                                                                                                                                                                                                                     |                 |      |     |      |     |        |
|---------------------------------------------------------------------------------------------------------------------------------|---------------------------------------------------------------------------------------------------------------------------------------------------------------------------------------------------------------------------------------------------------------------------------------------------------------------------------------------------------------------------------------------------------------------------------------------------------------------------------------------------------------------------------------------------------------------|-----------------|------|-----|------|-----|--------|
| The evolutionary history of lethal metastatic prostate cancer                                                                   | Gundem, Gunes; Van Loo, Peter; Kremeyer, Barbara; Alexandrov, Ludmil B.; Tubio, Jose M. C.; Papaemmanuil, Elli; Brewer, Daniel S.; Kallio, Heini M. L.; Hoegnas, Gunilla; Annala, Matti; Kivinummi, Kati; Goody, Victoria; Latimer, Calli; O'Meara, Sarah; Dawson, Kevin J.; Isaacs, William; Emmert-Buck, Michael R.; Nykter, Matti; Foster, Christopher; Kote-Jarai, Zsolia; Easton, Douglas; Whitaker, Hayley C.; Neal, David E.; Cooper, Colin S.; Eeles, Rosalind A.; Visakorpi, Tapio; Campbell, Peter J.; McDermott, Ultan; Wedge, David C.; Bova, G. Steven | NATURE          | 2015 | 520 | 7547 | 604 | 100,67 |
| Divergent clonal evolution of castration-resistant neuroendocrine prostate cancer                                               | Beltran, Himisha; Prandi, Davide; Mosquera, Juan Miguel; Benelli, Matteo; Puca, Loredana; Cyrta, Joanna; Marotz, Clarisse; Giannopoulou, Eugenia; Chakravarthi, Balabhadrapatruni V. S. K.; Varambally, Sooryanarayana; Tomlins, Scott A.; Nanus, David M.; Tagawa, Scott T.; Van Allen, Eliezer M.; Elemento, Olivier; Sboner, Andrea; Garraway, Levi A.; Rubin, Mark A.; Demichelis, Francesca                                                                                                                                                                    | NATURE MEDICINE | 2016 | 22  | 3    | 485 | 97     |
| Substantial interindividual and limited intraindividual genomic diversity among tumors from men with metastatic prostate cancer | Kumar, Akash; Coleman, Ilsa; Morrissey, Colm; Zhang, Xiaotun; True, Lawrence D.; Gulati, Roman; Etzioni, Ruth; Bolouri, Hamid; Montgomery, Bruce; White, Thomas; Lucas, Jared M.; Brown, Lisha G.; Dumpit, Ruth F.; DeSarkar, Navonil; Higano, Celestia; Yu, Evan Y.; Coleman, Roger; Schultz, Nikolaus; Fang, Min; Lange, Paul H.; Shendure, Jay; Vessella, Robert L.; Nelson, Peter S.                                                                                                                                                                            | NATURE MEDICINE | 2016 | 22  | 4    | 267 | 53,4   |

|                                                                                       |                                                                                                                                                                                                                                                                                                                                                                                                                                                                                                                                                                             |                       |      |     |      |     |      |
|---------------------------------------------------------------------------------------|-----------------------------------------------------------------------------------------------------------------------------------------------------------------------------------------------------------------------------------------------------------------------------------------------------------------------------------------------------------------------------------------------------------------------------------------------------------------------------------------------------------------------------------------------------------------------------|-----------------------|------|-----|------|-----|------|
| Integrative clinical genomics of metastatic cancer                                    | Robinson, Dan R.; Wu, Yi-Mi; Lonigro, Robert J.; Vats, Pankaj; Cobain, Erin; Everett, Jessica; Cao, Xuhong; Rabban, Erica; Kumar-Sinha, Chandan; Raymond, Victoria; Schuetze, Scott; Alva, Ajai; Siddiqui, Javed; Chugh, Rashmi; Worden, Francis; Zalupski, Mark M.; Innis, Jeffrey; Mody, Rajen J.; Tomlins, Scott A. .; Lucas, David; Baker, Laurence H.; Ramnath, Nithya; Schott, Ann F.; Hayes, Daniel F.; Vijai, Joseph; Offit, Kenneth; Stoffel, Elena M.; Roberts, J. Scott; Smith, David C.; Kunju, Lakshmi P.; Talpaz, Moshe; Cieslik, Marcin; Chinnaiyan, Arul M. | NATURE                | 2017 | 548 | 7667 | 202 | 50,5 |
| Tracking the origins and drivers of subclonal metastatic expansion in prostate cancer | Hong, Matthew K. H.; Macintyre, Geoff; Wedge, David C.; Van Loo, Peter; Patel, Keval; Lunke, Sebastian; Alexandrov, Ludmil B.; Sloggett, Clare; Cmero, Marek; Marass, Francesco; Tsui, Dana; Mangiola, Stefano; Lonie, Andrew; Naeem, Haroon; Sapre, Nikhil; Phal, Pramit M.; Kurganovs, Natalie; Chin, Xiaowen; Kerger, Michael; Warren, Anne Y.; Neal, David; Gnanapragasam, Vincent; Rosenfeld, Nitzan; Pedersen, John S.; Ryan, Andrew; Haviv, Izhak; Costello, Anthony J.; Corcoran, Niall M.; Hovens, Christopher M.                                                  | NATURE COMMUNICATIONS | 2015 | 6   |      | 189 | 31,5 |

|                                                                                                                                                                                                                                 |                                                                                                                                                                                                                                                                         |                              |      |    |   |     |       |
|---------------------------------------------------------------------------------------------------------------------------------------------------------------------------------------------------------------------------------|-------------------------------------------------------------------------------------------------------------------------------------------------------------------------------------------------------------------------------------------------------------------------|------------------------------|------|----|---|-----|-------|
| A Biopsy-based 17-gene Genomic Prostate Score Predicts Recurrence After Radical Prostatectomy and Adverse Surgical Pathology in a Racially Diverse Population of Men with Clinically Low- and Intermediate-risk Prostate Cancer | Cullen, Jennifer; Rosner, Inger L.; Brand, Timothy C.; Zhang, Nan; Tsiatis, Athanasios C.; Moncur, Joel; Ali, Amina; Chen, Yongmei; Knezevic, Dejan; Maddala, Tara; Lawrence, H. Jeffrey; Febbo, Phillip G.; Srivastava, Shiv; Sesterhenn, Isabell A.; McLeod, David G. | EUROPEAN UROLOGY             | 2015 | 68 | 1 | 141 | 23,5  |
| Genomic Classifier Identifies Men With Adverse Pathology After Radical Prostatectomy Who Benefit From Adjuvant Radiation Therapy                                                                                                | Den, Robert B.; Yousefi, Kasra; Trabulsi, Edouard J.; Abdollah, Firas; Choeurng, Voleak; Feng, Felix Y.; Dicker, Adam P.; Lallas, Costas D.; Gomella, Leonard G.; Davicioni, Elai; Karnes, R. Jeffrey                                                                   | JOURNAL OF CLINICAL ONCOLOGY | 2015 | 33 | 8 | 127 | 21,17 |
| Genomic Predictors of Outcome in Prostate Cancer                                                                                                                                                                                | Bostrom, Peter J.; Bjartell, Anders S.; Catto, James W. F.; Eggener, Scott E.; Lilja, Hans; Loeb, Stacy; Schalken, Jack; Schlomm, Thorsten; Cooperberg, Matthew R.                                                                                                      | EUROPEAN UROLOGY             | 2015 | 68 | 6 | 103 | 17,17 |

|                                                                                                                                                         |                                                                                                                                                                                                                                                                                                                                                         |                  |      |    |   |     |      |
|---------------------------------------------------------------------------------------------------------------------------------------------------------|---------------------------------------------------------------------------------------------------------------------------------------------------------------------------------------------------------------------------------------------------------------------------------------------------------------------------------------------------------|------------------|------|----|---|-----|------|
| Combined Value of Validated Clinical and Genomic Risk Stratification Tools for Predicting Prostate Cancer Mortality in a High-risk Prostatectomy Cohort | Cooperberg, Matthew R.; Davicioni, Elai; Crisan, Anamaria; Jenkins, Robert B.; Ghadessi, Mercedeh; Karnes, R. Jeffrey                                                                                                                                                                                                                                   | EUROPEAN UROLOGY | 2015 | 67 | 2 | 102 | 17   |
| Tissue-based Genomics Augments Post-prostatectomy Risk Stratification in a Natural History Cohort of Intermediate- and High-Risk Men                    | Ross, Ashley E.; Johnson, Michael H.; Yousefi, Kasra; Davicioni, Elai; Netto, George J.; Marchionni, Luigi; Fedor, Helen L.; Glavaris, Stephanie; Choeurng, Voleak; Buerki, Christine; Erho, Nicholas; Lam, Lucia L.; Humphreys, Elizabeth B.; Faraj, Sheila; Bezerra, Stephania M.; Han, Misop; Partin, Alan W.; Trock, Bruce J.; Schaeffer, Edward M. | EUROPEAN UROLOGY | 2016 | 69 | 1 | 102 | 20,4 |

|                                                                                                                                                                                                           |                                                                                                                                                                                                                                                                                                                                                                                                                                                                                                                                      |                              |      |    |    |    |      |
|-----------------------------------------------------------------------------------------------------------------------------------------------------------------------------------------------------------|--------------------------------------------------------------------------------------------------------------------------------------------------------------------------------------------------------------------------------------------------------------------------------------------------------------------------------------------------------------------------------------------------------------------------------------------------------------------------------------------------------------------------------------|------------------------------|------|----|----|----|------|
| A Genomic Classifier Improves Prediction of Metastatic Disease Within 5 Years After Surgery in Node-negative High-risk Prostate Cancer Patients Managed by Radical Prostatectomy Without Adjuvant Therapy | Klein, Eric A.; Yousefi, Kasra; Haddad, Zaid; Choeurng, Voleak; Buerki, Christine; Stephenson, Andrew J.; Li, Jianbo; Kattan, Michael W.; Magi-Galluzzi, Cristina; Davicioni, Elai                                                                                                                                                                                                                                                                                                                                                   | EUROPEAN UROLOGY             | 2015 | 67 | 4  | 96 | 16   |
| Clinical and Genomic Characterization of Treatment-Emergent Small-Cell Neuroendocrine Prostate Cancer: A Multi-institutional Prospective Study                                                            | Aggarwal, Rahul; Huang, Jiaoti; Alumkal, Joshi J.; Zhang, Li; Feng, Felix Y.; Thomas, George V.; Weinstein, Alana S.; Friedl, Verena; Zhang, Can; Witte, Owen N.; Lloyd, Paul; Gleave, Martin; Evans, Christopher P.; Youngren, Jack; Beer, Tomasz M.; Rettig, Matthew; Wong, Christopher K.; True, Lawrence; Foye, Adam; Playdle, Denise; Ryan, Charles J.; Lara, Primo; Chi, Kim N.; Uzunangelov, Vlado; Sokolov, Artem; Newton, Yulia; Beltran, Himisha; Demichelis, Francesca; Rubin, Mark A.; Stuart, Joshua M.; Small, Eric J. | JOURNAL OF CLINICAL ONCOLOGY | 2018 | 36 | 24 | 93 | 31   |
| Decipher Genomic Classifier Measured on Prostate Biopsy Predicts Metastasis Risk                                                                                                                          | Klein, Eric A.; Haddad, Zaid; Yousefi, Kasra; Lam, Lucia L. C.; Wang, Qiqi; Choeurng, Voleak; Palmer-Aronsten, Beatrix; Buerki, Christine; Davicioni, Elai; Li, Jianbo; Kattan, Michael W.; Stephenson, Andrew J.; Magi-Galluzzi, Cristina                                                                                                                                                                                                                                                                                           | UROLOGY                      | 2016 | 90 |    | 79 | 15,8 |

|                                                                                                                                       |                                                                                                                                                                                                                                                                                                                                                                                |                          |      |     |    |    |       |
|---------------------------------------------------------------------------------------------------------------------------------------|--------------------------------------------------------------------------------------------------------------------------------------------------------------------------------------------------------------------------------------------------------------------------------------------------------------------------------------------------------------------------------|--------------------------|------|-----|----|----|-------|
| Combined Tumor Suppressor Defects Characterize Clinically Defined Aggressive Variant Prostate Cancers                                 | Aparicio, Ana M.; Shen, Li; Tapia, Elsa Li Ning; Lu, Jing-Fang; Chen, Hsiang-Chun; Zhang, Jiexin; Wu, Guanglin; Wang, Xuemei; Troncoso, Patricia; Corn, Paul; Thompson, Timothy C.; Broom, Bradley; Baggerly, Keith; Maity, Sankar N.; Logothetis, Christopher J.                                                                                                              | CLINICAL CANCER RESEARCH | 2016 | 22  | 6  | 78 | 15,6  |
| miR-195 Inhibits Tumor Progression by Targeting RPS6KB1 in Human Prostate Cancer                                                      | Cai, Chao; Chen, Qing-Biao; Han, Zhao-Dong; Zhang, Yan-Qiong; He, Hui-Chan; Chen, Jia-Hong; Chen, Yan-Ru; Yang, Sheng-Bang; Wu, Yong-Ding; Zeng, Yan-Ru; Qin, Guo-Qiang; Liang, Yu-Xiang; Dai, Qi-Shan; Jiang, Fu-Neng; Wu, Shu-lin; Zeng, Guo-Hua; Zhong, Wei-De; Wu, Chin-Lee                                                                                                | CLINICAL CANCER RESEARCH | 2015 | 21  | 21 | 76 | 12,67 |
| Phosphoproteome Integration Reveals Patient-Specific Networks in Prostate Cancer                                                      | Drake, Justin M.; Paull, Evan O.; Graham, Nicholas A.; Lee, John K.; Smith, Bryan A.; Titz, Bjoern; Stoyanova, Tanya; Faltermeier, Claire M.; Uzunangelov, Vladislav; Carlin, Daniel E.; Fleming, Daniel Teo; Wong, Christopher K.; Newton, Yulia; Sudha, Sud; Vashisht, Ajay A.; Huang, Jiaoti; Wohlschlegel, James A.; Graeber, Thomas G.; Witte, Owen N.; Stuart, Joshua M. | CELL                     | 2016 | 166 | 4  | 72 | 14,4  |
| Intrinsic BET inhibitor resistance in SPOP-mutated prostate cancer is mediated by BET protein stabilization and AKT-mTORC1 activation | Zhang, Pingzhao; Wang, Dejie; Zhao, Yu; Ren, Shancheng; Gao, Kun; Ye, Zhenqing; Wang, Shangqian; Pan, Chun-Wu; Zhu, Yasheng; Yan, Yuqian; Yang, Yinhui; Wu, Di; He, Yundong; Zhang, Jun; Lu, Daru; Liu, Xiuping; Yu, Long; Zhao, Shimin; Li, Yao; Lin, Dong; Wang, Yuzhuo; Wang, Ligu; Chen, Yu; Sun, Yinghao; Wang, Chenji; Huang, Haojie                                     | NATURE MEDICINE          | 2017 | 23  | 9  | 72 | 18    |

|                                                                                                                             |                                                                                                                                                                                                                                                                                                                                                                                                                         |                              |      |    |    |    |       |
|-----------------------------------------------------------------------------------------------------------------------------|-------------------------------------------------------------------------------------------------------------------------------------------------------------------------------------------------------------------------------------------------------------------------------------------------------------------------------------------------------------------------------------------------------------------------|------------------------------|------|----|----|----|-------|
| Novel Biomarker Signature That May Predict Aggressive Disease in African American Men With Prostate Cancer                  | Yamoah, Kosj; Johnson, Michael H.; Choeurng, Voleak; Faisal, Farzana A.; Yousefi, Kasra; Haddad, Zaid; Ross, Ashley E.; Alshalafa, Mohammed; Den, Robert; Lal, Priti; Feldman, Michael; Dicker, Adam P.; Klein, Eric A.; Davicioni, Elai; Rebbeck, Timothy R.; Schaeffer, Edward M.                                                                                                                                     | JOURNAL OF CLINICAL ONCOLOGY | 2015 | 33 | 25 | 70 | 11,67 |
| SRRM4 Drives Neuroendocrine Transdifferentiation of Prostate Adenocarcinoma Under Androgen Receptor Pathway Inhibition      | Li, Yanan; Donmez, Nilgun; Sahinalp, Cenk; Xie, Ning; Wang, Yuwei; Xue, Hui; Mo, Fan; Beltran, Himisha; Gleave, Martin; Wang, Yuzhuo; Collins, Colin; Dong, Xuesen                                                                                                                                                                                                                                                      | EUROPEAN UROLOGY             | 2017 | 71 | 1  | 69 | 17,25 |
| Development and Clinical Validation of an In Situ Biopsy-Based Multimarker Assay for Risk Stratification in Prostate Cancer | Blume-Jensen, Peter; Berman, David M.; Rimm, David L.; Shipitsin, Michail; Putzi, Mathew; Nifong, Thomas P.; Small, Clayton; Choudhury, Sibgat; Capela, Teresa; Coupal, Louis; Ernst, Christina; Hurley, Aeron; Kaprelyants, Alex; Chang, Hua; Giladi, Eldar; Nardone, Julie; Dunyak, James; Loda, Massimo; Klein, Eric A.; Magi-Galluzzi, Cristina; Latour, Mathieu; Epstein, Jonathan I.; Kantoff, Philip; Saad, Fred | CLINICAL CANCER RESEARCH     | 2015 | 21 | 11 | 69 | 11,5  |
| Stem cell and neurogenic gene-expression profiles link prostate basal cells to aggressive prostate cancer                   | Zhang, Dingxiao; Park, Daechan; Zhong, Yi; Lu, Yue; Rycaj, Kiera; Gong, Shuai; Chen, Xin; Liu, Xin; Chao, Hsueh-Ping; Whitney, Pamela; Calhoun-Davis, Tammy; Takata, Yoko; Shen, Jianjun; Iyer, Vishwanath R.; Tang, Dean G.                                                                                                                                                                                            | NATURE COMMUNICATIONS        | 2016 | 7  |    | 65 | 13    |



|                                                                                                                                                                     |                                                                                                                                                                                                                                                                                                                               |                           |      |     |      |    |       |
|---------------------------------------------------------------------------------------------------------------------------------------------------------------------|-------------------------------------------------------------------------------------------------------------------------------------------------------------------------------------------------------------------------------------------------------------------------------------------------------------------------------|---------------------------|------|-----|------|----|-------|
| MicroRNA expression signature of castration-resistant prostate cancer: the microRNA-221/222 cluster functions as a tumour suppressor and disease progression marker | Goto, Yusuke; Kojima, Satoko; Nishikawa, Rika; Kurozumi, Akira; Kato, Mayuko; Enokida, Hideki; Matsushita, Ryosuke; Yamazaki, Kazuto; Ishida, Yasuo; Nakagawa, Masayuki; Naya, Yukio; Ichikawa, Tomohiko; Seki, Naohiko                                                                                                       | BRITISH JOURNAL OF CANCER | 2015 | 113 | 7    | 65 | 10,83 |
| ROR-gamma drives androgen receptor expression and represents a therapeutic target in castration-resistant prostate cancer                                           | Wang, Junjian; Zou, June X.; Xue, Xiaoqian; Cai, Demin; Zhang, Yan; Duan, Zhijian; Xiang, Qiuping; Yang, Joy C.; Louie, Maggie C.; Borowsky, Alexander D.; Gao, Allen C.; Evans, Christopher P.; Lam, Kit S.; Xu, Jianzhen; Kung, Hsing-Jien; Evans, Ronald M.; Xu, Yong; Chen, Hong-Wu                                       | NATURE MEDICINE           | 2016 | 22  | 5    | 65 | 13    |
| Biology and evolution of poorly differentiated neuroendocrine tumors                                                                                                | Rickman, David S.; Beltran, Himisha; Demichelis, Francesca; Rubin, Mark A.                                                                                                                                                                                                                                                    | NATURE MEDICINE           | 2017 | 23  | 6    | 60 | 15    |
| Minimal functional driver gene heterogeneity among untreated metastases                                                                                             | Reiter, Johannes G.; Makohon-Moore, Alvin P.; Gerold, Jeffrey M.; Heyde, Alexander; Attiyeh, Marc A.; Kohutek, Zachary A.; Tokheim, Collin J.; Brown, Alexia; DeBlasio, Rayne M.; Niyazov, Juliana; Zucker, Amanda; Karchin, Rachel; Kinzler, Kenneth W.; Iacobuzio-Donahue, Christine A.; Vogelstein, Bert; Nowak, Martin A. | SCIENCE                   | 2018 | 361 | 6406 | 58 | 19,33 |

|                                                                                                                           |                                                                                                                                                                                                                                                                                                                                                                                                                                                                                                                                                                                                                                                                                                                                                              |                              |      |    |   |    |       |
|---------------------------------------------------------------------------------------------------------------------------|--------------------------------------------------------------------------------------------------------------------------------------------------------------------------------------------------------------------------------------------------------------------------------------------------------------------------------------------------------------------------------------------------------------------------------------------------------------------------------------------------------------------------------------------------------------------------------------------------------------------------------------------------------------------------------------------------------------------------------------------------------------|------------------------------|------|----|---|----|-------|
| Development and Validation of a Novel Integrated Clinical-Genomic Risk Group Classification for Localized Prostate Cancer | Spratt, Daniel E.; Zhang, Jingbin; Santiago-Jimenez, Maria; Dess, Robert T.; Davis, John W.; Den, Robert B.; Dicker, Adam P.; Kane, Christopher J.; Pollack, Alan; Stoyanova, Radka; Abdollah, Firas; Ross, Ashley E.; Cole, Adam; Uchio, Edward; Randall, Josh M.; Hao Nguyen; Zhao, Shuang G.; Mehra, Rohit; Glass, Andrew G.; Lam, Lucia L. C.; Chelliserry, Jijumon; du Plessis, Marguerite; Choeurng, Voleak; Aranes, Maria; Kolisnik, Tyler; Margrave, Jennifer; Alter, Jason; Jordan, Jennifer; Buerki, Christine; Yousefi, Kasra; Haddad, Zaid; Davicioni, Elai; Trabulsi, Edouard J.; Loeb, Stacy; Tewari, Ashutosh; Carroll, Peter R.; Weinmann, Sheila; Schaeffer, Edward M.; Klein, Eric A.; Karnes, R. Jeffrey; Feng, Felix Y.; Nguyen, Paul L. | JOURNAL OF CLINICAL ONCOLOGY | 2018 | 36 | 6 | 53 | 17,67 |
| Meta-analysis of miRNA expression profiles for prostate cancer recurrence following radical prostatectomy                 | Pashaei, Elnaz; Pashaei, Elham; Ahmady, Maryam; Ozen, Mustafa; Aydin, Nizamettin                                                                                                                                                                                                                                                                                                                                                                                                                                                                                                                                                                                                                                                                             | PLOS ONE                     | 2017 | 12 | 6 | 50 | 12,5  |

|                                                                    |                                                                                                                                                                                                                                                                                                                                                                                                                                                                                                                                                                                |                       |      |    |   |    |       |
|--------------------------------------------------------------------|--------------------------------------------------------------------------------------------------------------------------------------------------------------------------------------------------------------------------------------------------------------------------------------------------------------------------------------------------------------------------------------------------------------------------------------------------------------------------------------------------------------------------------------------------------------------------------|-----------------------|------|----|---|----|-------|
| Patient derived organoids to model rare prostate cancer phenotypes | Puca, Loredana; Bareja, Rohan; Prandi, Davide; Shaw, Reid; Benelli, Matteo; Karthaus, Wouter R.; Hess, Judy; Sigouros, Michael; Donoghue, Adam; Kossai, Myriam; Gao, Dong; Cyrta, Joanna; Sailer, Verena; Vosoughi, Aram; Pauli, Chantal; Churakova, Yelena; Cheung, Cynthia; Deonarine, Lesa Dayal; McNary, Terra J.; Rosati, Rachele; Tagawa, Scott T.; Nanus, David M.; Mosquera, Juan Miguel; Sawyers, Charles L.; Chen, Yu; Inghirami, Giorgio; Rao, Rema A.; Grandori, Carla; Elemento, Olivier; Sboner, Andrea; Demichelis, Francesca; Rubin, Mark A.; Beitrah, Himisha | NATURE COMMUNICATIONS | 2018 | 9  |   | 49 | 16,33 |
| The Proteome of Primary Prostate Cancer                            | Iglesias-Gato, Diego; Wikstrom, Pernilla; Tyanova, Stefka; Lavalley, Charlotte; Thysell, Elin; Carlsson, Jessica; Hagglof, Christina; Cox, Juergen; Andren, Ove; Stattin, Par; Egevad, Lars; Widmark, Anders; Bjartell, Anders; Collins, Colin C.; Bergh, Anders; Geiger, Tamar; Mann, Matthias; Flores-Morales, Amilcar                                                                                                                                                                                                                                                       | EUROPEAN UROLOGY      | 2016 | 69 | 5 | 49 | 9,8   |
| Polycomb-mediated silencing in neuroendocrine prostate cancer      | Clermont, Pier-Luc; Lin, Dong; Crea, Francesco; Wu, Rebecca; Xue, Hui; Wang, Yuwei; Thu, Kelsie L.; Lam, Wan L.; Collins, Colin C.; Wang, Yuzhuo; Helgason, Cheryl D.                                                                                                                                                                                                                                                                                                                                                                                                          | CLINICAL EPIGENETICS  | 2015 | 7  |   | 44 | 7,33  |

|                                                                                                                                                                                                                                          |                                                                                                                                                                                                                                                                  |                              |      |    |    |    |      |
|------------------------------------------------------------------------------------------------------------------------------------------------------------------------------------------------------------------------------------------|------------------------------------------------------------------------------------------------------------------------------------------------------------------------------------------------------------------------------------------------------------------|------------------------------|------|----|----|----|------|
| Genomic Classifier Augments the Role of Pathological Features in Identifying Optimal Candidates for Adjuvant Radiation Therapy in Patients With Prostate Cancer: Development and Internal Validation of a Multivariable Prognostic Model | Dalela, Deepansh; Santiago-Jimenez, Maria; Yousefi, Kasra; Karnes, R. Jeffrey; Ross, Ashley E.; Den, Robert B.; Freedland, Stephen J.; Schaeffer, Edward M.; Dicker, Adam P.; Menon, Mani; Briganti, Alberto; Davicioni, Elai; Abdollah, Firas                   | JOURNAL OF CLINICAL ONCOLOGY | 2017 | 35 | 18 | 39 | 9,75 |
| Long non-coding RNA urothelial carcinoma associated 1 (UCA1) mediates radiation response in prostate cancer                                                                                                                              | Ghiam, Alireza Fotouhi; Taeb, Samira; Huang, Xiaoyong; Huang, Vincent; Ray, Jessica; Scarcello, Seville; Hoey, Christianne; Jahangiri, Sahar; Fokas, Emmanouil; Loblaw, Andrew; Bristow, Robert G.; Vesprini, Danny; Boutros, Paul; Liu, Stanley K.              | ONCOTARGET                   | 2017 | 8  | 3  | 35 | 8,75 |
| Transcriptome Sequencing Reveals PCAT5 as a Novel ERG-Regulated Long Noncoding RNA in Prostate Cancer                                                                                                                                    | Ylipaa, Antti; Kivinummi, Kati; Kohvakka, Annika; Annala, Matti; Latonen, Leena; Scaravilli, Mauro; Kartasalo, Kimmo; Leppanen, Simo-Pekka; Karakurt, Serdar; Seppala, Janne; Yli-Harja, Olli; Tammela, Teuvo L. J.; Zhang, Wei; Visakorpi, Tapio; Nykter, Matti | CANCER RESEARCH              | 2015 | 75 | 19 | 35 | 5,83 |

|                                                                                                                                                                |                                                                                                                                                                                                                                                                                                                                                                                                                                                                                          |                          |      |     |   |    |      |
|----------------------------------------------------------------------------------------------------------------------------------------------------------------|------------------------------------------------------------------------------------------------------------------------------------------------------------------------------------------------------------------------------------------------------------------------------------------------------------------------------------------------------------------------------------------------------------------------------------------------------------------------------------------|--------------------------|------|-----|---|----|------|
| Validation of a Genomic Classifier for Predicting Post-Prostatectomy Recurrence in a Community Based Health Care Setting                                       | Glass, Andrew G.; Leo, Michael C.; Haddad, Zaid; Yousefi, Kasra; du Plessis, Marguerite; Chen, Chuhe; Choeurng, Voleak; Abdollah, Firas; Robbins, Bruce; Ra, Seong; Richert-Boe, Kathryn E.; Buerki, Christine; Pearson, Kathy; Davicioni, Elai; Weinmann, Sheila                                                                                                                                                                                                                        | JOURNAL OF UROLOGY       | 2016 | 195 | 6 | 25 | 5    |
| A Phase II Trial of the Aurora Kinase A Inhibitor Alisertib for Patients with Castration-resistant and Neuroendocrine Prostate Cancer: Efficacy and Biomarkers | Beltran, Himisha; Oromendia, Clara; Danila, Daniel C.; Montgomery, Bruce; Hoimes, Christopher; Szmulewitz, Russell Z.; Vaishampayan, Ulka; Armstrong, Andrew J.; Stein, Mark; Pinski, Jacek; Mosquera, Juan M.; Sailer, Verena; Bareja, Rohan; Romanel, Alessandro; Gumpeni, Naveen; Sboner, Andrea; Dardenne, Etienne; Puca, Loredana; Prandi, Davide; Rubin, Mark A.; Scher, Howard I.; Rickman, David S.; Demichelis, Francesca; Nanus, David M.; Ballman, Karla V.; Tagawa, Scott T. | CLINICAL CANCER RESEARCH | 2019 | 25  | 1 | 25 | 12,5 |
| Differentially methylated genes and androgen receptor re-expression in small cell prostate carcinomas                                                          | Kleb, Brittany; Estecio, Marcos R. H.; Zhang, Jiexin; Tzelepid, Vassiliki; Chung, Woonbok; Jelinek, Jaroslav; Navone, Nora M.; Tahir, Salahaldin; Marquez, Victor E.; Issa, Jean-Pierre; Maity, Sankar; Aparicio, Ana                                                                                                                                                                                                                                                                    | EPIGENETICS              | 2016 | 11  | 3 | 24 | 4,8  |

|                                                                                                                                                                                                |                                                                                                                                                                                                                                                                                                                                                                                                                                                                                                      |                   |      |     |    |    |      |
|------------------------------------------------------------------------------------------------------------------------------------------------------------------------------------------------|------------------------------------------------------------------------------------------------------------------------------------------------------------------------------------------------------------------------------------------------------------------------------------------------------------------------------------------------------------------------------------------------------------------------------------------------------------------------------------------------------|-------------------|------|-----|----|----|------|
| Decipher Test Impacts Decision Making Among Patients Considering Adjuvant and Salvage Treatment After Radical Prostatectomy: Interim Results From the Multicenter Prospective PRO-IMPACT Study | Gore, John L.; du Plessis, Marguerite G.; Santiago-Jimenez, Maria K.; Yousefi, Kasra K.; Thompson, Darby K.; Karsh, Lawrence P.; Lane, Brian R.; Franks, Michael T.; Chen, David S.; Bandyk, Mark P.; Bianco, Fernando J.; Brown, Gordon T.; Clark, William R.; Kibel, Adam S.; Kim, Hyung A.; Lowrance, William M.; Manoharan, Murugesan T.; Maroni, Paul U.; Perrapato, Scott, V; Sieber, Paul R.; Trabulsi, Edouard J.; Waterhouse, Robert C.; Davicioni, Elai T.; Lotan, Yair A.; Lin, Daniel W. | CANCER            | 2017 | 123 | 15 | 24 | 6    |
| Effect of a genomic classifier test on clinical practice decisions for patients with high-risk prostate cancer after surgery                                                                   | Badani, Ketan K.; Thompson, Darby J.; Brown, Gordon; Holmes, Daniel; Kella, Naveen; Albala, David; Singh, Amar; Buerki, Christine; Davicioni, Elai; Hornberger, John                                                                                                                                                                                                                                                                                                                                 | BJU INTERNATIONAL | 2015 | 115 | 3  | 24 | 4    |
| BRD4 Promotes DNA Repair and Mediates the Formation of TMPRSS2-ERG Gene Rearrangements in Prostate Cancer                                                                                      | Li, Xiangyi; Baek, GuemHee; Ramanand, Susmita G.; Sharp, Adam; Gao, Yunpeng; Yuan, Wei; Welti, Jon; Rodrigues, Daniel N.; Dolling, David; Figueiredo, Ines; Sumanasuriya, Semini; Crespo, Mateus; Aslam, Adam; Li, Rui; Yin, Yi; Mukherjee, Bipasha; Kanchwala, Mohammed; Hughes, Ashley M.; Halsey, Wendy S.; Chiang, Cheng-Ming; Xing, Chao; Raj, Ganesh V.; Burma, Sandeep; de Bono, Johann; Mani, Ram S.                                                                                         | CELL REPORTS      | 2018 | 22  | 3  | 23 | 7,67 |

|                                                                                                                                     |                                                                                                                                                                                                                                                                                                                                                                                                                                                                                                                   |                        |      |    |    |    |      |
|-------------------------------------------------------------------------------------------------------------------------------------|-------------------------------------------------------------------------------------------------------------------------------------------------------------------------------------------------------------------------------------------------------------------------------------------------------------------------------------------------------------------------------------------------------------------------------------------------------------------------------------------------------------------|------------------------|------|----|----|----|------|
| Translating a Prognostic DNA Genomic Classifier into the Clinic: Retrospective Validation in 563 Localized Prostate Tumors          | Lalonde, Emilie; Alkallas, Rached; Chua, Melvin Lee Kiang; Fraser, Michael; Haider, Syed; Meng, Alice; Zheng, Junyan; Yao, Cindy Q.; Picard, Valerie; Orain, Michele; Hovington, Helene; Murgic, Jure; Berlin, Alejandro; Lacombe, Louis; Bergeron, Alain; Fradet, Yves; Tetu, Bernard; Lindberg, Johan; Egevad, Lars; Gronberg, Henrik; Ross-Adams, Helen; Lamb, Alastair D.; Halim, Silvia; Dunning, Mark J.; Neal, David E.; Pintilie, Melania; van der Kwast, Theodorus; Bristow, Robert G.; Boutros, Paul C. | EUROPEAN UROLOGY       | 2017 | 72 | 1  | 22 | 5,5  |
| Androgen receptor splice variants bind to constitutively open chromatin and promote abiraterone-resistant growth of prostate cancer | He, Yundong; Lu, Ji; Ye, Zhenqing; Hao, Siyuan; Wang, Liewei; Kohli, Manish; Tindall, Donald J.; Li, Benyi; Zhu, Runzhi; Wang, Liguu; Huang, Haojie                                                                                                                                                                                                                                                                                                                                                               | NUCLEIC ACIDS RESEARCH | 2018 | 46 | 4  | 21 | 7    |
| Genomic deletion of chromosome 12p is an independent prognostic marker in prostate cancer                                           | Kluth, Martina; Ahrary, Ramin; Hube-Magg, Claudia; Ahmed, Malik; Volta, Heinke; Schwemin, Catina; Steurer, Stefan; Wittmer, Corinna; Wilczak, Waldemar; Krech, Eike Burandt Till; Adam, Meike; Michl, Uwe; Heinzer, Hans; Salomon, Georg; Graefen, Markus; Koop, Christina; Minner, Sarah; Simon, Ronald; Sauter, Guido; Schlomm, Thorsten                                                                                                                                                                        | ONCOTARGET             | 2015 | 6  | 29 | 20 | 3,33 |

|                                                                                       |                                                                                                                                                                                                                                                                                                                                                                                                                                                                                                                                                                                                                                                               |                       |      |    |   |    |     |
|---------------------------------------------------------------------------------------|---------------------------------------------------------------------------------------------------------------------------------------------------------------------------------------------------------------------------------------------------------------------------------------------------------------------------------------------------------------------------------------------------------------------------------------------------------------------------------------------------------------------------------------------------------------------------------------------------------------------------------------------------------------|-----------------------|------|----|---|----|-----|
| ONECUT2 is a driver of neuroendocrine prostate cancer                                 | Guo, Haiyang; Ci, Xinpei; Ahmed, Musaddeque; Hua, Junjie Tony; Soares, Fraser; Lin, Dong; Puca, Loredana; Vosoughi, Aram; Xue, Hui; Li, Estelle; Su, Peiran; Chen, Sujun; Tran Nguyen; Liang, Yi; Zhang, Yuzhe; Xu, Xin; Xu, Jing; Sheahan, Anjali V.; Ba-Alawi, Wail; Zhang, Si; Mahamud, Osman; Vellanki, Ravi N.; Gleave, Martin; Bristow, Robert G.; Haibe-Kains, Benjamin; Poirier, John T.; Rudin, Charles M.; Tsao, Ming-Sound; Wouters, Bradley G.; Fazli, Ladan; Feng, Felix Y.; Ellis, Leigh; van der Kwast, Theo; Berlin, Alejandro; Koritzinsky, Marianne; Boutros, Paul C.; Zoubeydi, Amina; Beltran, Himisha; Wang, Yuzhuo; He, Housheng Hansen | NATURE COMMUNICATIONS | 2019 | 10 |   | 19 | 9,5 |
| Proteomic Tissue-Based Classifier for Early Prediction of Prostate Cancer Progression | Gao, Yuqian; Wang, Yi-Ting; Chen, Yongmei; Wang, Hui; Young, Denise; Shi, Tujin; Song, Yingjie; Schepmoes, Athena A.; Kuo, Claire; Fillmore, Thomas L.; Qian, Wei-Jun; Smith, Richard D.; Srivastava, Sudhir; Kagan, Jacob; Dobi, Albert; Sesterhenn, Isabell A.; Rosner, Inger L.; Petrovics, Gyorgy; Rodland, Karin D.; Srivastava, Shiv; Cullen, Jennifer; Liu, Tao                                                                                                                                                                                                                                                                                        | CANCERS               | 2020 | 12 | 5 | 1  | 1   |



|                                                                                                                                                                       |                                                                                                                                                                                                                                                                                                                                                                                                                                        |                                   |      |    |   |   |   |
|-----------------------------------------------------------------------------------------------------------------------------------------------------------------------|----------------------------------------------------------------------------------------------------------------------------------------------------------------------------------------------------------------------------------------------------------------------------------------------------------------------------------------------------------------------------------------------------------------------------------------|-----------------------------------|------|----|---|---|---|
| Clinical and genomic insights into circulating tumor DNA-based alterations across the spectrum of metastatic hormone-sensitive and castrate-resistant prostate cancer | Kohli, Manish; Tan, Winston; Zheng, Tiantian; Wang, Amy; Montesinos, Carlos; Wong, Calven; Du, Pan; Jia, Shidong; Yadav, Siddhartha; Horvath, Lisa G.; Mahon, Kate L.; Kwan, Edmond M.; Fettke, Heidi; Yu, Jianjun; Azad, Arun A.                                                                                                                                                                                                      | EBIOMEDICINE                      | 2020 | 54 |   | 1 | 1 |
| Multi-omic serum biomarkers for prognosis of disease progression in prostate cancer                                                                                   | Kiebish, Michael A.; Cullen, Jennifer; Mishra, Prachi; Ali, Amina; Milliman, Eric; Rodrigues, Leonardo O.; Chen, Emily Y.; Tolstikov, Vladimir; Zhang, Lixia; Panagopoulos, Kiki; Shah, Punit; Chen, Yongmei; Petrovics, Gyorgy; Rosner, Inger L.; Sesterhenn, Isabell A.; McLeod, David G.; Granger, Elder; Sarangarajan, Rangaprasad; Akmaev, Viatcheslav; Srinivasan, Alagarsamy; Srivastava, Shiv; Narain, Niven R.; Dobi, Albert  | JOURNAL OF TRANSLATIONAL MEDICINE | 2020 | 18 | 1 | 1 | 1 |
| 2,4-dienoyl-CoA reductase regulates lipid homeostasis in treatment-resistant prostate cancer                                                                          | Blomme, Arnaud; Ford, Catriona A.; Mui, Ernest; Patel, Rachana; Ntala, Chara; Jamieson, Lauren E.; Planque, Melanie; McGregor, Grace H.; Peixoto, Paul; Hervouet, Eric; Nixon, Colin; Salji, Mark; Gaughan, Luke; Markert, Elke; Repiscak, Peter; Sumpton, David; Blanco, Giovanni Rodriguez; Lilla, Sergio; Kamphorst, Jurre J.; Graham, Duncan; Faulds, Karen; MacKay, Gillian M.; Fendt, Sarah-Maria; Zanivan, Sara; Leung, Hing Y. | NATURE COMMUNICATIONS             | 2020 | 11 | 1 | 0 | 0 |

|                                                                                                                                                    |                                                                                                                                                                                                                                                                                                                                                                                                                                                                                                                                                                                                             |                               |      |    |   |   |   |
|----------------------------------------------------------------------------------------------------------------------------------------------------|-------------------------------------------------------------------------------------------------------------------------------------------------------------------------------------------------------------------------------------------------------------------------------------------------------------------------------------------------------------------------------------------------------------------------------------------------------------------------------------------------------------------------------------------------------------------------------------------------------------|-------------------------------|------|----|---|---|---|
| SLFN11 Expression in Advanced Prostate Cancer and Response to Platinum-based Chemotherapy                                                          | Conteduca, Vincenza; Ku, Sheng-Yu; Puca, Loredana; Slade, Megan; Fernandez, Luisa; Hess, Judy; Bareja, Rohan; Vlachostergios, Panagiotis J.; Sigouros, Michael; Mosquera, Juan Miguel; Sboner, Andrea; Nanus, David M.; Elemento, Olivier; Dittamore, Ryan; Tagawa, Scott T.; Beltran, Himisha                                                                                                                                                                                                                                                                                                              | MOLECULAR CANCER THERAPEUTICS | 2020 | 19 | 5 | 0 | 0 |
| Exome sequencing identified six copy number variations as a prediction model for recurrence of primary prostate cancers with distinctive prognosis | Liu, Jie; Yan, Jiajun; Mao, Ruifang; Ren, Guoping; Liu, Xiaoyan; Zhang, Yanling; Wang, Jili; Wang, Yan; Li, Meiling; Qiu, Qingchong; Wang, Lin; Liu, Guanfeng; Jin, Shanshan; Ma, Liang; Ma, Yingying; Zhao, Na; Zhang, Hongwei; Lin, Biaoyang                                                                                                                                                                                                                                                                                                                                                              | TRANSLATIONAL CANCER RESEARCH | 2020 | 9  | 4 | 0 | 0 |
| STAT3-dependent analysis reveals PDK4 as independent predictor of recurrence in prostate cancer                                                    | Oberhuber, Monika; Pecoraro, Matteo; Rusz, Mate; Oberhuber, Georg; Wieselberg, Maritta; Haslinger, Peter; Gurnhofer, Elisabeth; Schleder, Michaela; Limberger, Tanja; Lagger, Sabine; Pencik, Jan; Kodajova, Petra; Hoegler, Sandra; Stockmaier, Georg; Grund-Groeschke, Sandra; Aberger, Fritz; Bolis, Marco; Theurillat, Jean-Philippe; Wiebringhaus, Robert; Weiss, Theresa; Haitel, Andrea; Brehme, Marc; Wadsak, Wolfgang; Griss, Johannes; Mohr, Thomas; Hofer, Alexandra; Jaeger, Anton; Pollheimer, Juergen; Egger, Gerda; Koellensperger, Gunda; Mann, Matthias; Hantusch, Brigitte; Kenner, Lukas | MOLECULAR SYSTEMS BIOLOGY     | 2020 | 16 | 4 | 0 | 0 |

|                                                                                                                                |                                                                                                                                                                                                                                                                                                                                                                                                                           |                                 |      |     |   |   |   |
|--------------------------------------------------------------------------------------------------------------------------------|---------------------------------------------------------------------------------------------------------------------------------------------------------------------------------------------------------------------------------------------------------------------------------------------------------------------------------------------------------------------------------------------------------------------------|---------------------------------|------|-----|---|---|---|
| Integrative Analysis of MicroRNA and Gene Interactions for Revealing Candidate Signatures in Prostate Cancer                   | Wei, Jingchao; Yin, Yinghao; Deng, Qiancheng; Zhou, Jun; Wang, Yong; Yin, Guangming; Yang, Jianfu; Tang, Yuxin                                                                                                                                                                                                                                                                                                            | FRONTIERS IN GENETICS           | 2020 | 11  |   | 0 | 0 |
| Integrative clinical transcriptome analysis reveals TMPRSS2-ERG dependency of prognostic biomarkers in prostate adenocarcinoma | Gerke, Julia S.; Orth, Martin F.; Tolkach, Yuri; Romero-Perez, Laura; Wehweck, Fabienne S.; Stein, Stefanie; Musa, Julian; Knott, Maximilian M. L.; Hoelting, Tilman L. B.; Li, Jing; Sannino, Giuseppina; Marchetto, Aruna; Ohmura, Shunya; Cidre-Aranaz, Florencia; Mueller-Nurasyid, Martina; Strauch, Konstantin; Stief, Christian; Kristiansen, Glen; Kirchner, Thomas; Buchner, Alexander; Gruenewald, Thomas G. P. | INTERNATIONAL JOURNAL OF CANCER | 2020 | 146 | 7 | 0 | 0 |
